# Supplementary material
Source: publisher figshare collection journal article supplement (https://gsapubs.figshare.com/ndownloader/files/23295149)

# PLATE 1: GEOLOGIC MAP AND CROSS-SECTIONS OF THE EASTERN ESPAÑOLA BASIN

GSA DR Item 2013139 accompanies the following chapter ([https://doi.org/10.1130/2013.2494\(08\)](https://doi.org/10.1130/2013.2494(08))) in GSA Special Paper 494:

## Structure and tectonic evolution of the eastern Española Basin, Rio Grande rift, north-central New Mexico

Daniel J. Koning, V.J.S. Grauch, Sean D. Connell, John Ferguson, William McIntosh, Janet L. Slate, Elmira Wan, and W. Scott Baldrige

### ACKNOWLEDGMENTS

Subsurface interpretations of Proterozoic and Paleozoic strata in the eastern third of cross-section I-I' are by Adam Read (New Mexico Bureau of Geology and Mineral Resources). Eastern third of cross-section G-G' slightly modified from Borchert et al. (1998). Pre-Santa Fe Group structure in cross-sections G-G' and H-H' drawn using Biehler et al. (1991). Cather (1992), and Grauch et al. (2009). Pre-Santa Fe Group structure in cross-section C-C' used unpublished gravity data and interpretations by Sean Biehler (Univ. of California, Riverside). Depths of basalt under Caja del Rio Plateau based in part from magnetotelluric soundings (Brian Rodriguez, written communication, 2009). Surface faults on the Caja del Rio Plateau drawn using Minor et al. (2013).

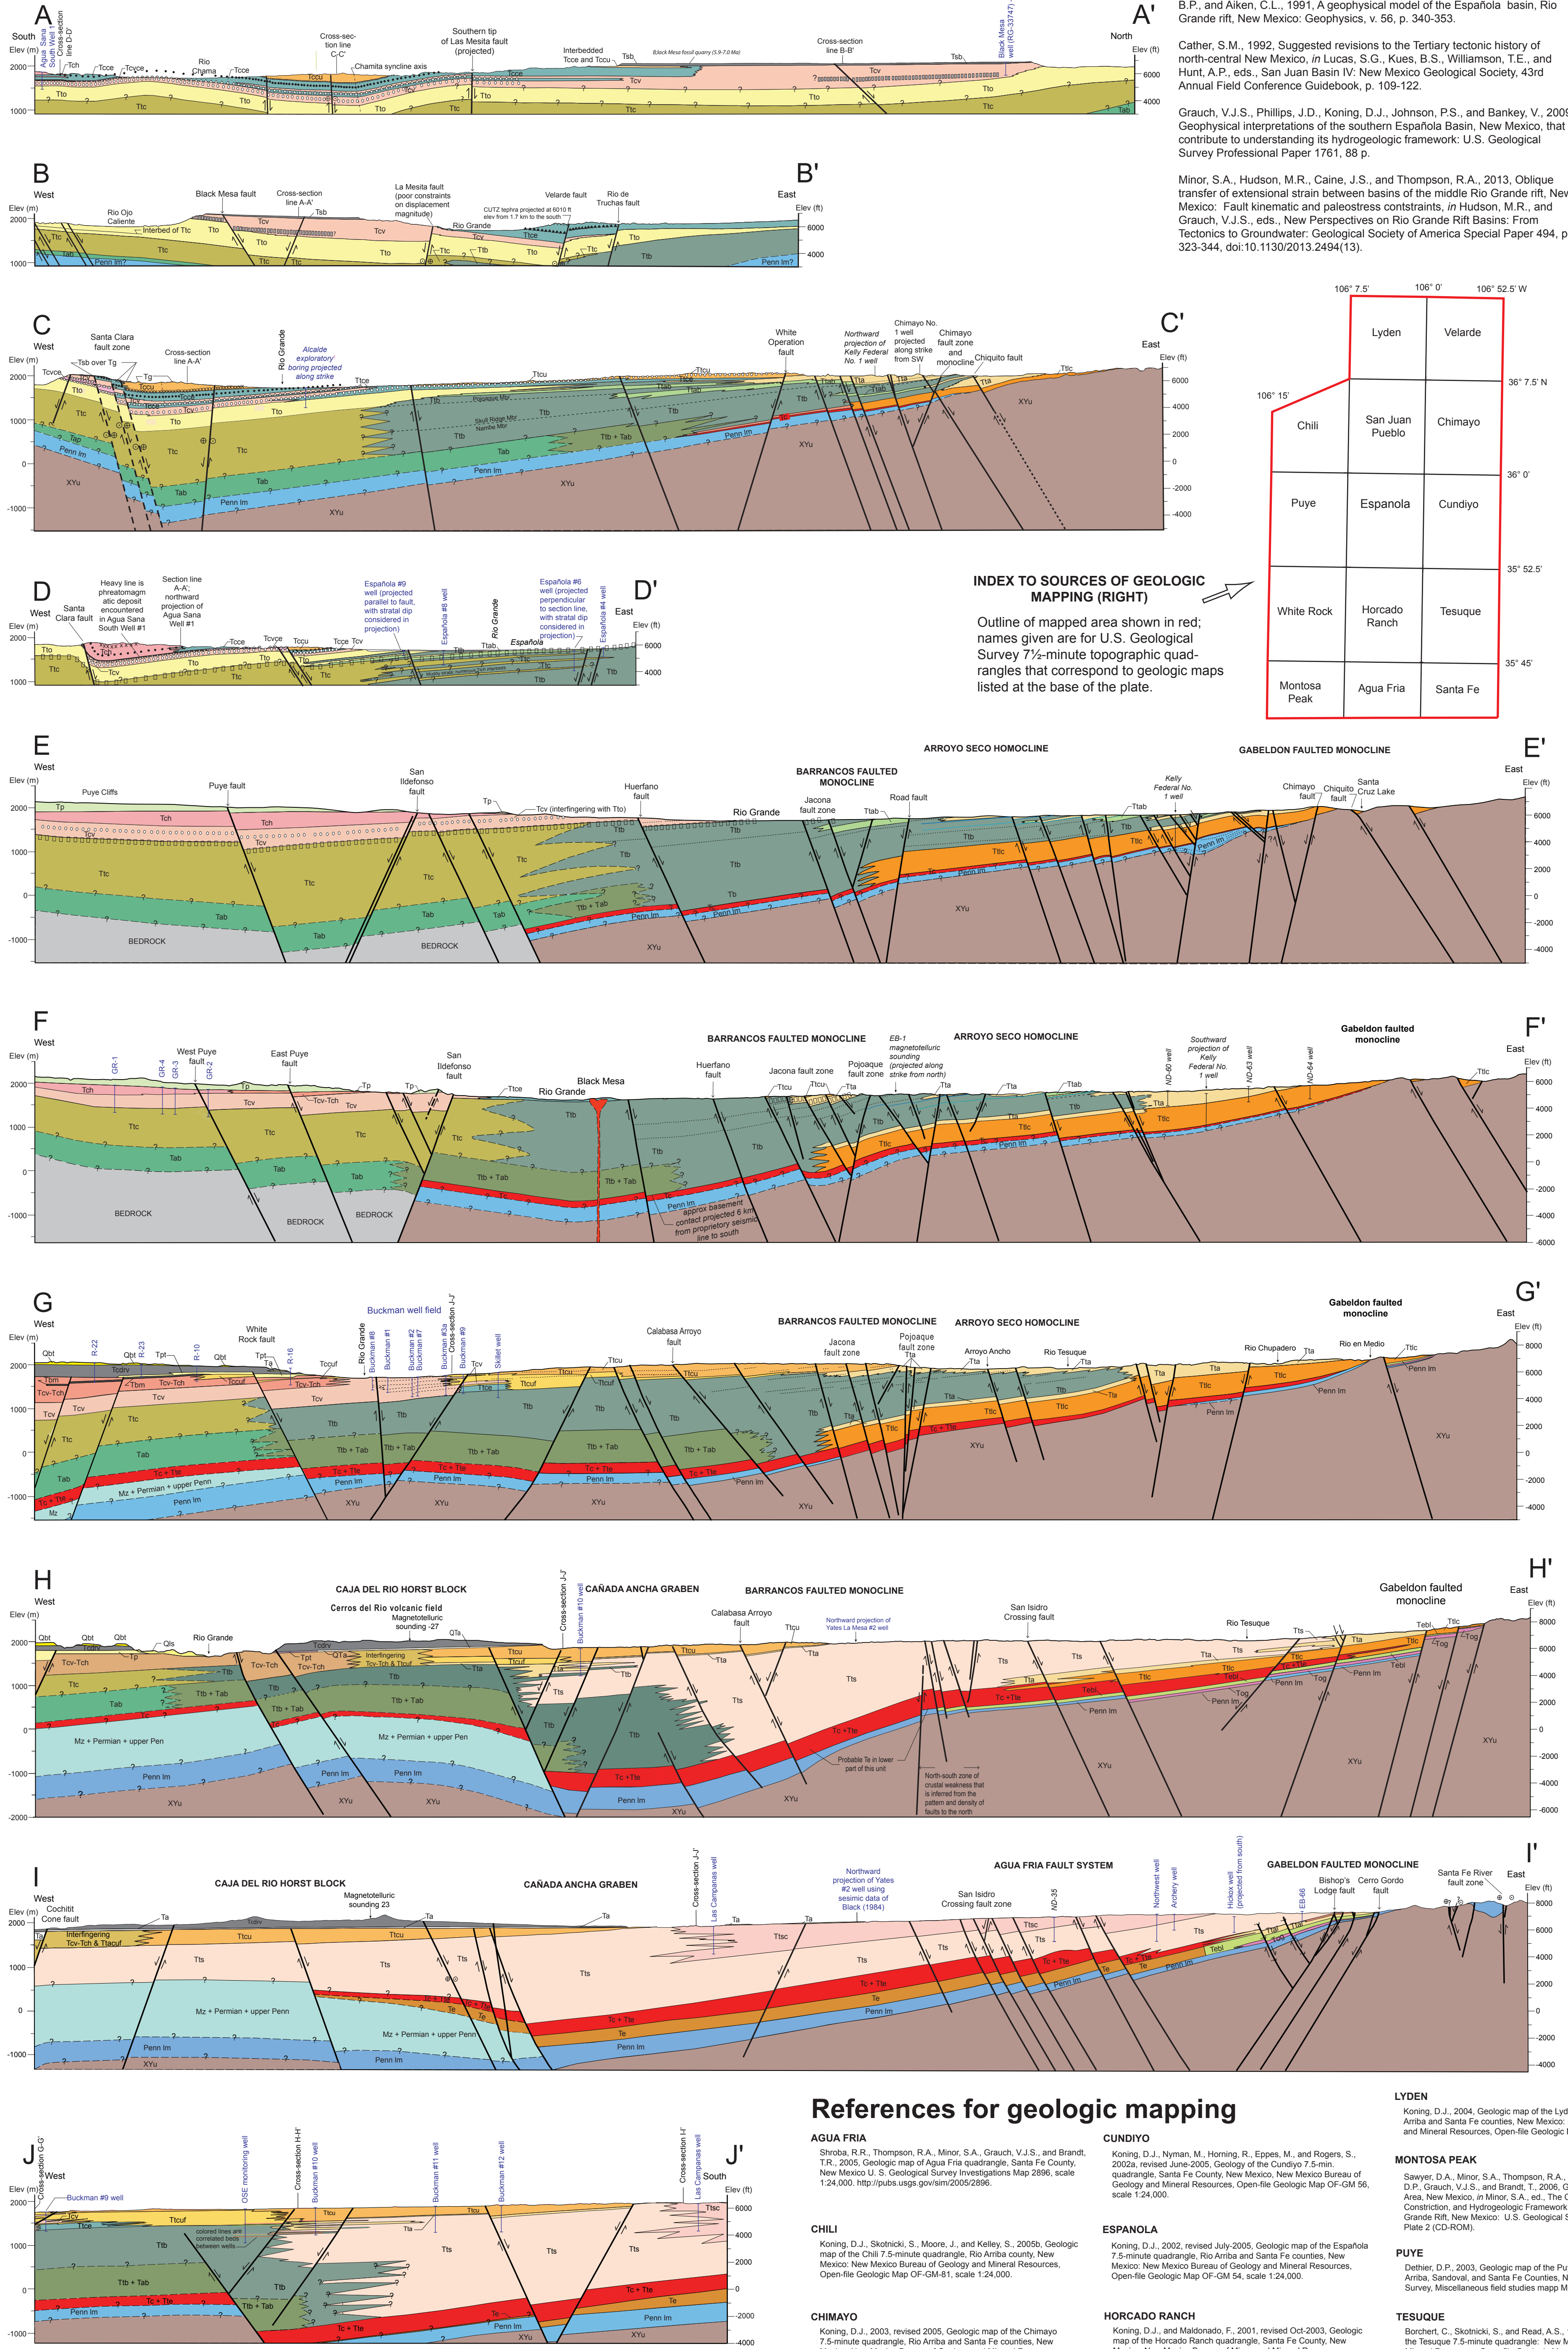

### EXPLANATION

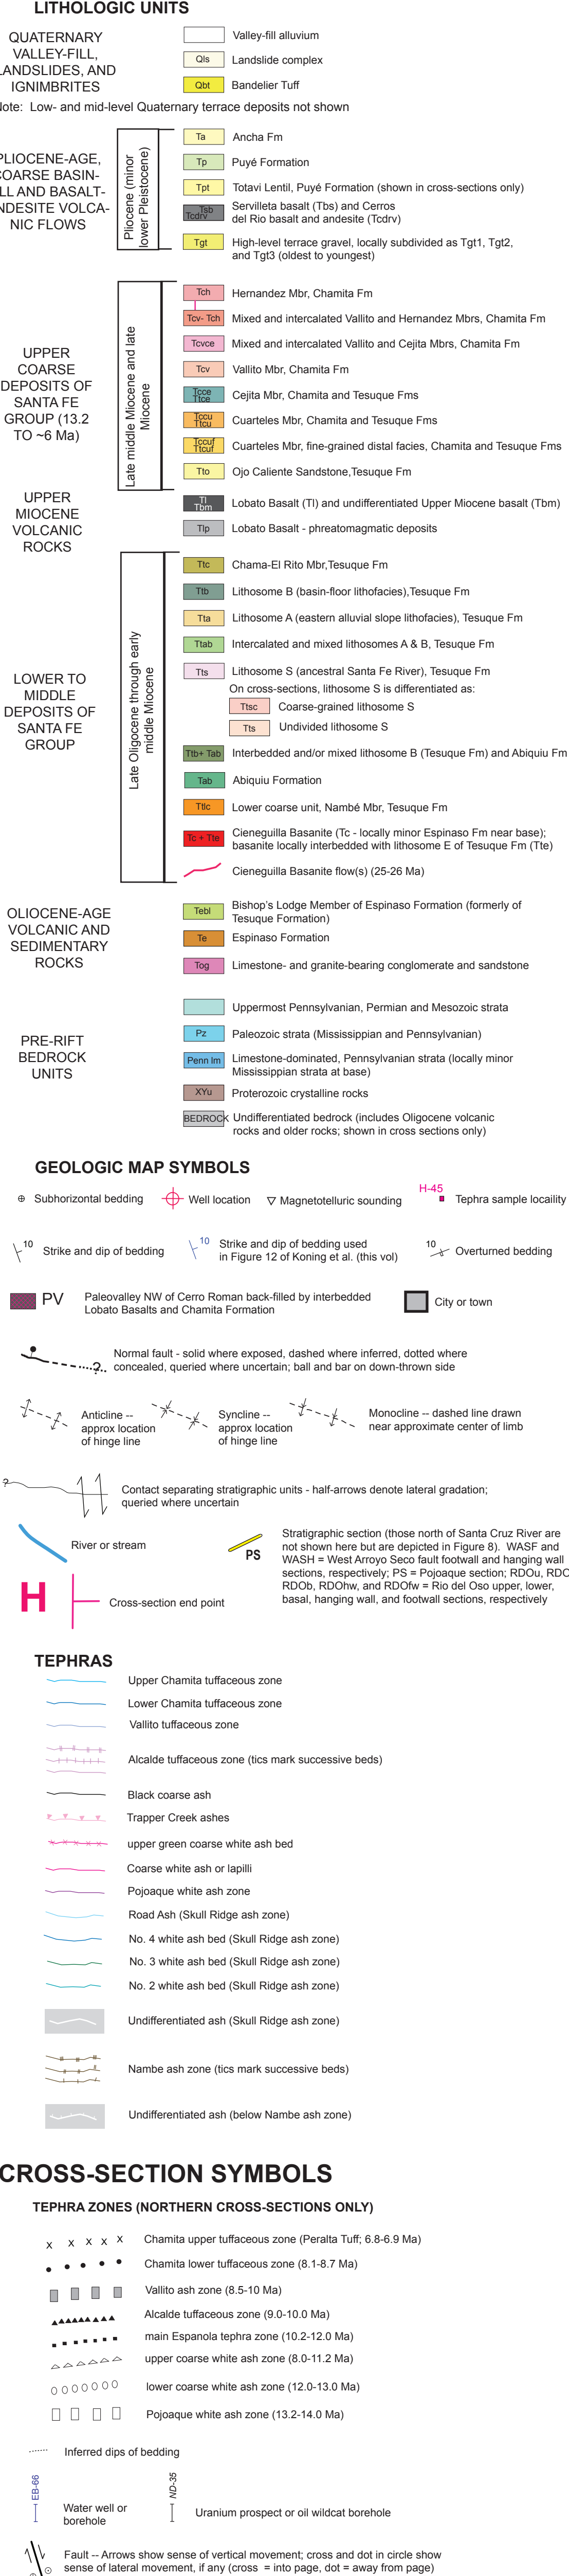

### References for geologic mapping

AGUA FRIA  
Schroeder, R.E., Thompson, B.A., Minor, S.A., Grauch, V.J.S., and Brandt, T.R., 2005. Geologic map of Agua Fria quadrangle, Santa Fe County, New Mexico. New Mexico Bureau of Geology and Mineral Resources. Open-File Geologic Map OF-GM-56, scale 1:24,000. <http://pubs.usgs.gov/of/2005/2896/>

CHILLY  
Koning, D.J., Skutumpah, S., Moore, J., and Kelley, S., 2009. Geologic map of the Chilly 7.5-minute quadrangle, Rio Arriba County, New Mexico. New Mexico Bureau of Geology and Mineral Resources. Open-File Geologic Map OF-GM-61, scale 1:24,000.

CHIMAYO  
Koning, D.J., 2003, revised 2005. Geologic map of the Chimayo 7.5-minute quadrangle, Rio Arriba and Santa Fe counties, New Mexico. New Mexico Bureau of Geology and Mineral Resources. Open-File Geologic Map OF-GM-47, scale 1:24,000.

CUNDIYO  
Koning, D.J., Naranjo, M., Hanning, R., Lopez, M., and Rogers, S., 2003a, revised June-2005. Geologic map of the Cundiyo 7.5-minute quadrangle, Santa Fe County, New Mexico. New Mexico Bureau of Geology and Mineral Resources. Open-File Geologic Map OF-GM-56, scale 1:24,000.

ESPAÑOLA  
Koning, D.J., 2002, revised July-2005. Geologic map of the Española 7.5-minute quadrangle, Rio Arriba and Santa Fe counties, New Mexico. New Mexico Bureau of Geology and Mineral Resources. Open-File Geologic Map OF-GM-56, scale 1:24,000.

HORRADO RANCH  
Koning, D.J., and Maldonado, F., 2001, revised Oct-2003. Geologic map of the Horrado Ranch quadrangle, Santa Fe County, New Mexico. New Mexico Bureau of Geology and Mineral Resources. Open-File Geologic Map OF-GM-47, scale 1:24,000.

LYDEN  
Koning, D.J., 2004. Geologic map of the Lyden 7.5-minute quadrangle, Rio Arriba and Santa Fe counties, New Mexico. New Mexico Bureau of Geology and Mineral Resources. Open-File Geologic Map OF-GM-58, scale 1:24,000.

MONTOSA PEAK  
Sawyer, D.A., Minor, S.A., Thompson, R.A., Shroba, R.R., Smith, G.A., Deffen, D.P., Grauch, V.J.S., and Brandt, T.R., 2006. Geologic map of the Montosa Peak 7.5-minute quadrangle, Santa Fe County, New Mexico. New Mexico Bureau of Geology and Mineral Resources. Open-File Geologic Map OF-GM-56, scale 1:24,000.

PUEY  
Dether, D.P., 2003. Geologic map of the Puey Quadrangle, Los Alamos, Rio Arriba, Sandoval, and Santa Fe Counties, New Mexico. U.S. Geological Survey, Miscellaneous Field Studies Map MF-2419, scale 1:24,000.

TESUQUE  
Borchert, C., Skutumpah, S., and Read, A.S., 1998. Preliminary geologic map of the Tesuque 7.5-minute quadrangle, Santa Fe County, New Mexico. New Mexico Bureau of Geology and Mineral Resources. Open-File Geologic Map OF-GM-48, scale 1:24,000.

WHITE ROCK  
Dether, D.P., and Koning, D.J., 2007. Preliminary geologic map of the White Rock 7.5-minute quadrangle, Los Alamos and Santa Fe counties, New Mexico. New Mexico Bureau of Geology and Mineral Resources. Open-File Geologic Map OF-GM-48, scale 1:24,000.

VELARDE  
Koning, D.J., and Aky, S., 2003, revised June-2004. Geologic map of the Velarde 7.5-minute quadrangle, Rio Arriba and Santa Fe counties, New Mexico. New Mexico Bureau of Geology and Mineral Resources. Open-File Geologic Map OF-GM-70, scale 1:24,000.

SANTA FE  
Read, A.S., Koning, D.J., Smith, G.A., Raiser, S., Rogers, J., and Bauer, P.W., 2000. Geologic map of the Santa Fe 7.5-minute quadrangle, New Mexico. New Mexico Bureau of Geology and Mineral Resources. Open-File Geologic Map OF-GM-56, scale 1:24,000.

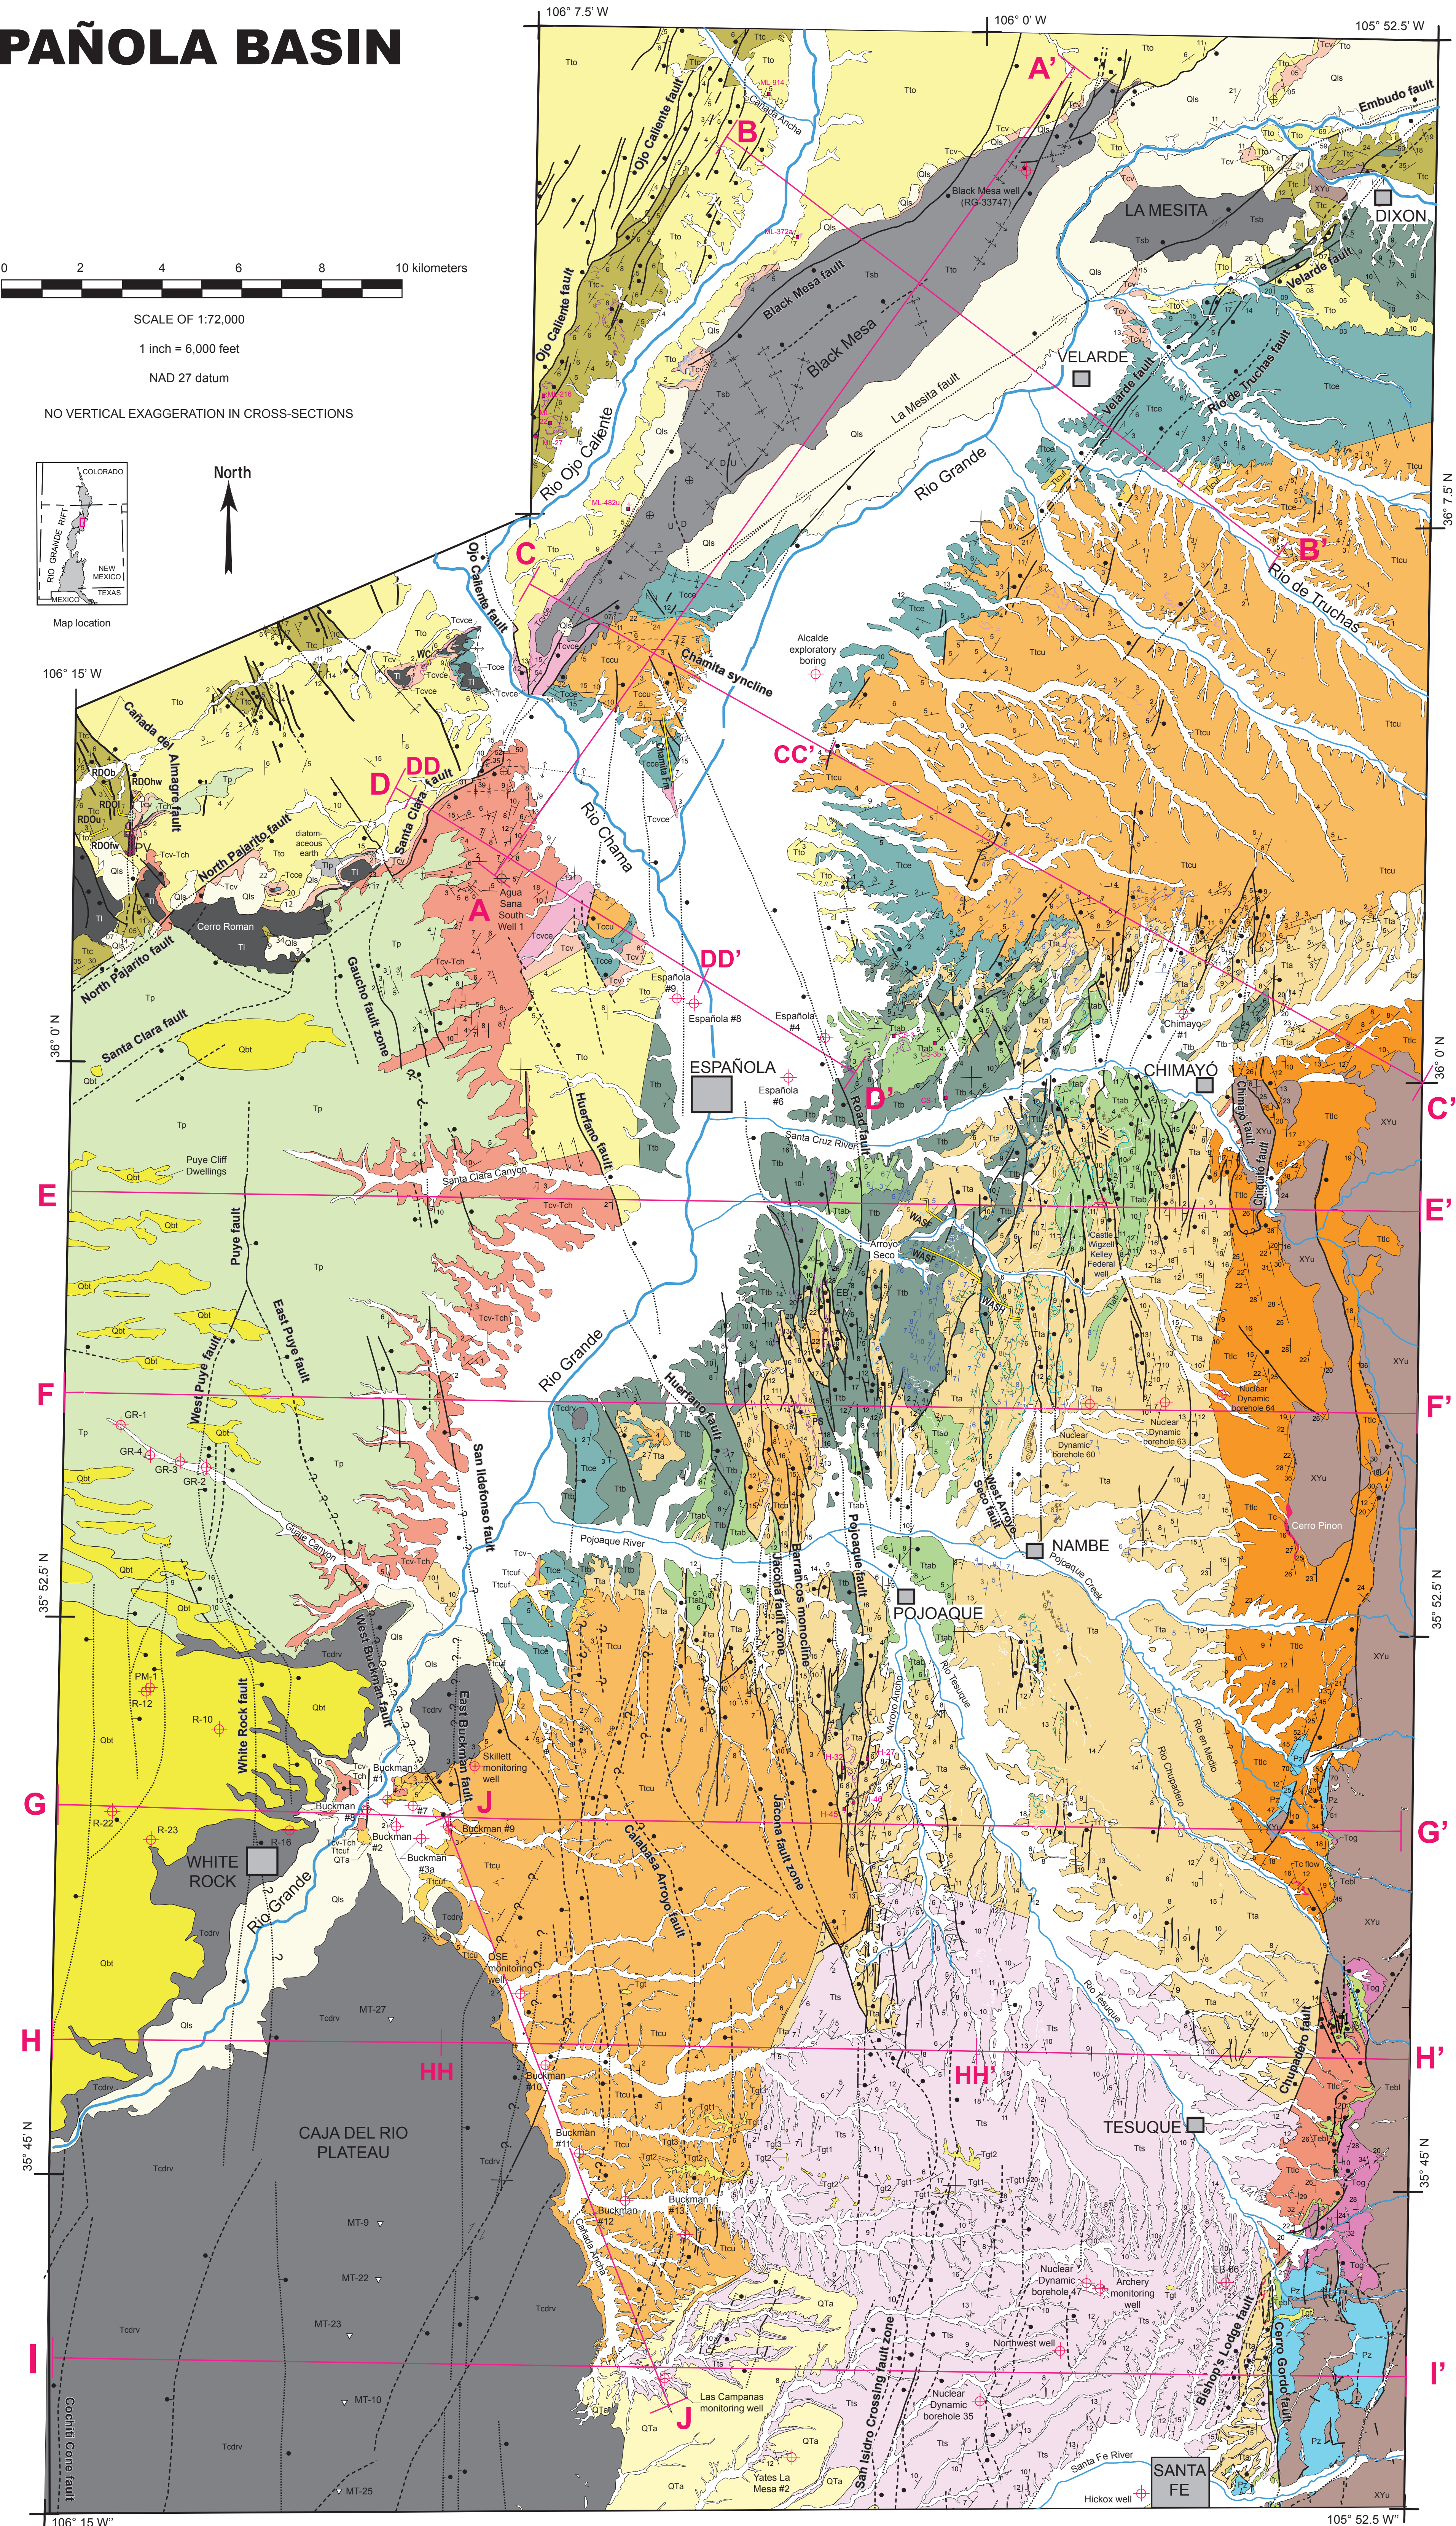

Supplement: Supplementary file 1 [file 23295149 › 2013139-Plate1.pdf]
