# Supplementary material
Source: publisher figshare collection journal article supplement (https://gsapubs.figshare.com/ndownloader/files/23295149)
Supplement: Supplementary file 1 [file 23295149]

Archive with 11 entries (11 files):
- 2013139-App_A.pdf
- 2013139-App_B.pdf
- 2013139-App_C.pdf
- 2013139-App_C_biotite_sanidine_data.XLS
- 2013139-App_C_groundmass_data.XLS
- 2013139-App_D.pdf
- 2013139-App_E.pdf
- 2013139-App_F.pdf
- 2013139-App_G.pdf
- 2013139-App_H.pdf
- 2013139-Plate1.pdf
