# Supplementary material
Source: publisher figshare collection journal article supplement (https://gsapubs.figshare.com/ndownloader/files/23295149)
Supplement: Supplementary file 1 [file 23295149 › 2013139-App_A.pdf]

## **APPENDIX A. STRATIGRAPHY OF THE TESUQUE AND CHAMITA FORMATIONS**

This appendix reviews stratigraphic relations and nomenclature for the Tesuque and Chamita Formations. Strata of these formations were deposited in three main depositional environments (Figure A-1): 1) a west-sloping, eastern alluvial slope (piedmont) along the foot of the Sangre de Cristo Mountains (Smith, 2000a; Kuhle and Smith, 2001); a south-sloping basin-floor, and 3) a south- to southeast-sloping western alluvial slope (piedmont) -- the latter two areas reached headward into the San Luis Basin. These depositional environments resulted in three distinct lithofacies assemblages that grade laterally with one another, which we call the eastern alluvial slope, basin-floor, and western alluvial slope lithofacies assemblages. Two smaller depositional areas include upper Oligocene-lower Miocene alluvial fans flanking the Cerrillos Uplift and upper Miocene-Pliocene alluvial fans flanking the Jemez Mountains (Figure A-1).

In the Española Basin, the pre-Pliocene part of the Santa Fe Group has been subdivided into the Tesuque Formation (Spiegel and Baldwin, 1963) and a somewhat coarser-grained, overlying Chamita Formation (Galusha and Blick, 1971), as illustrated in Figure A-2. The Tesuque Formation has been subdivided into several members by Galusha and Blick (1971) that include the Nambé, Skull Ridge, and Pojoaque Members in the eastern part of the Española Basin, and the Chama-El Rito Member in the central and western part of the basin (including the western part of the eastern half-graben). The Chama-El Rito Member consists of the aforementioned western alluvial slope lithofacies assemblage, in which relatively coarse volcanoclastic sediment, derived from dacitic-andesitic volcanoes in the San Luis Basin, is interbedded with orange, quartz-rich sand (May, 1980; 1984; Ekas et al., 1984; Ingersoll et al., 1990). The other three members were defined more by biostratigraphic criteria than lithostratigraphic criteria, and cut

across the basin-floor and eastern alluvial slope lithofacies assemblages (Figure A-2). Cavazza (1986) informally called pre ~13.1 Ma Tesuque Formation sediment deposited on the basin-floor and eastern alluvial slope as lithosomes B and A, respectively (Figures A-1 and A-2). Lithosome B is gray to pink in color, contains significant felsic-intermediate volcanic and Paleozoic sedimentary rock detritus, and was deposited by south- to southwest-flowing streams. Lithosome A is orange to pink in color, consists of arkosic sand and granite-and quartzite-bearing gravel, and was deposited by a plethora of streams flowing west out of the granite-cored Sangre de Cristo Mountains. Interbedded in these strata are three tephra zones consisting of fine, white and gray ashes, listed from bottom to top: 1) the Nambé white ash zone (16.6-16.2 Ma) near the top of the Nambé Member that only consists of white ashes; 2) the Skull Ridge ash zone (15.8 to 15.1 Ma) in the Skull Ridge and Chama-El Rito Members, which includes all of the ashes mapped in the Skull Ridge Member by Galusha and Blick (1971) and Koning et al. (2002) except for the No. 1 white ash bed; and 3) the Pojoaque white ash zone (14.0-13.2 Ma) in the Pojoaque and Chama-El Rito Members (Figure A-1; age control discussed in Appendix B).

Defining the base of the Santa Fe Group has become more problematic because of recent observations of lower basin-fill strata 7-13 km northeast of downtown Santa Fe. From bottom to top, basin-fill units found here include: 1) a limestone- and granite-bearing sandy conglomerate that is locally over 400 m-thick (Smith, 2000b); 2) white to light gray, tuffaceous, silty-clayey sand and pebbly sand with latitic clasts; 3) reddish pebble- to cobble-conglomerate composed almost wholly of granite clasts. The lowest unit has been called the Nambé Member of the Tesuque Formation by previous workers (e.g., Spiegel and Baldwin, 1963; Smith, 2000b), and the middle unit has been called the Bishops Lodge Member of the Tesuque Formation (Brewster, 1956; Spiegel and Baldwin, 1963) or part of the Picuris Formation (Cabot, 1938; Galusha and

Blick, 1971). However, recent interpretations demonstrate that the Bishops Lodge Member is a distal equivalent of the Espinazo Formation (Smith, 2000b; Smith, 2004). The Espinazo Formation southwest of Santa Fe mostly consists of proximal, debris-flow dominated alluvial fan deposits of volcaniclastic conglomerate and sandstone, with minor latite, quartz latite, and andesite flows erupted from vents in what is now the Cerrillos Hills (Stearns, 1953; Kautz et al., 1981; Smith et al., 1991). The Espinazo Formation and correlative intrusions under its eroded source vents range in age from 36-26 Ma (Baldrige et al., 1980; Sauer, 1999; Sawyer et al., 2002), and generally is considered to underlie the Santa Fe Group (Spiegel and Baldwin, 1963; Kautz et al., 1981), as evident in the Yates #2 well (Figure A-3). In this paper, we agree with Smith (2004) and include the Bishops Lodge Member in the Espinazo Formation.

The upper unit (i.e., reddish conglomerate) constitutes the basal part of what we informally refer to as the “lower coarse unit” of the Tesuque Formation (unit Ttan1 of Koning et al., 2002). This unit is composed of pebbly sandstone, conglomerate, and sandstone. The lower coarse unit can be followed northwards to the Chimayo area, but its upper contact is gradational and indistinctive. Cross-sections and inspection of cuttings from the Kelley Federal well 3.5 km southeast of Chimayo indicate a thickness of 380-460 m (Figure A-4; Plate 1). The basal age of the lower coarse interval is constrained at 25.5-26.0 Ma based on a  $^{40}\text{Ar}/^{39}\text{Ar}$  age of  $25.52 \pm 0.07$  Ma from a tephra ~18 m above its base (Table 1 of manuscript, sample SET-26). The upper age limit of this interval is probably around 18 Ma because it underlies the upper, fine-grained part of the Nambe Member; these upper strata have been assigned an approximate age range of 16-18? Ma based on fossil data and geomagnetic polarity studies (Tedford and Barghoorn, 1993; Barghoorn, 1981 and 1985).

An unit informally called lithosome E by Koning and Johnson (2006) is found in the subsurface southwest of Santa Fe. Lithosome E consists of pebbly sand and clayey pebbly sand of latite and basalt detritus. It overlies the Cieneguilla basanite and also interfingers with it (Figure A-3). Sediment of lithosome E is interpreted to have been eroded from the Cieneguilla basanite and Espinazo Formation on the eastern flanks of the Cerrillos Uplift (Koning and Johnson, 2006; Figure A-1).

The distinctive Ojo Caliente Sandstone Member of the Tesuque Formation is found in the west-central and northwestern parts of the Española Basin (Figure A-1). This eolianite consists of fine- to coarse-grained sand that is commonly tangential cross-stratified (Koning et al., 2005a). The unit coarsens slightly up-section and interfingers southward with the Vallito Member of the Chamita Formation. It interfingers eastward with the upper Pojoaque and the Cejita Members of the Tesuque Formation (Koning et al., 2005a; Cejita and Vallito Members introduced below). Based on geochemical correlations of Slate et al. (2013), the upper Pojoaque white ash zone is likely present in the lower part of the Ojo Caliente Sandstone (~13.5-13.2 Ma; Appendix B). Probable Trapper Creek ashes are found in the middle and upper part of the sandstone (ages of  $12.17 \pm 0.3$  Ma and  $11.3 \pm 0.10$  Ma, respectively) on the western flank of the Velarde graben (Koning et al., 2011; Slate et al., 2013). We suspect that preserved Ojo Caliente Sandstone is older than 11 Ma over much of the Abiquiu embayment to the west.

An important coarsening event at 13.1-13.2 Ma (Koning, 2002; Koning et al., 2005a and 2007; Appendix B) is used to subdivide Miocene-age, Santa Fe Group strata (Figure A-2). In the coarser upper unit, the Cuarteles Member (Koning et al., 2005a; Koning and Aby, 2005) encompasses the eastern alluvial slope lithofacies assemblages (equivalent to lithosome A lower in the section) and the Cejita Member (Manley, 1976, 1977, 1979) includes deposits derived

from the Peñasco embayment. Both these members extend from the Tesuque Formation east of the Rio Grande into the Chamita Formation west of the Rio Grande, as allowed by the stratigraphic code (North America Commission on Stratigraphic Nomenclature, 2005; Koning and Aby, 2005; Koning et al., 2005a). The Cejita Member interfingers westward with sand (and minor silt-clay and pebbles) derived from the San Luis Basin and Abiquiu embayment, called the Vallito Member of the Chamita Formation, which in turn interfingers westward with gravel, sand, and silt-clay deposited by an ancestral Rio Chama, called the Hernandez Member of the Chamita Formation (Figure A-2; Koning and Aby, 2005). The Hernandez Member interfingers westward with alluvial fans consisting of felsic-intermediate volcanic detritus derived from the Jemez Mountains (not shown on Figure A-2). In addition to their overall coarser texture, these post 13.1-13.2 Ma strata are also distinctive in that coarse tephra are more common than fine tephra. These upper tephra beds include, from bottom to top: the lower coarse white ash zone (12.0-13.0 Ma), the main Española tephra zone (poorly constrained age of 10.2-12.0 Ma; not shown on Figure A-2), the Alcalde tephra zone (9.0-10.0 Ma), the Chamita lower tuffaceous zone (8.1-8.7 Ma), and the Chamita upper tuffaceous zone (6.8-6.9 Ma), which is correlative to the Peralta Tuff (McIntosh and Quade, 1995; Koning and Aby, 2003; Koning et al., 2004; 2005a and 2007). These coarse tephra are almost certainly a product of abundant felsic-intermediate volcanism in the nearby Jemez Mountains. This volcanism formed the flows, intrusions, and proximal volcanoclastic deposition of the Keres Group. An exception is the main Española tephra zone, which includes beds of black volcanic grains, interpreted to be basalt or basaltic andesite, possibly derived from early activity of the Lobato volcanic field in the northeast Jemez Mountains.

## REFERENCES

- Aldrich, M.J., and Dethier, D.P., 1990, Stratigraphic and tectonic evolution of the northern Española Basin, Rio Grande rift, New Mexico: Geological Society of America Bulletin, v. 102, p. 1695-1705.
- Baldrige, W.S., Damon, P.E., Shafiqullah, M., and Bridwell, R.J., 1980, Evolution of the central Rio Grande rift, New Mexico - new Potassium-Argon ages: Earth and Planetary Science Letters, v. 51, p. 309-321.
- Barghoorn, S., 1981, Magnetic-polarity stratigraphy of the Miocene type Tesuque Formation, Santa Fe Group, in the Española Valley, New Mexico: Geological Society of America Bulletin, v. 92, p. 1027-1041.
- Barghoorn, S.F., 1985, Magnetic polarity stratigraphy of the Tesuque Formation, Santa Fe Group, in the Española Valley, New Mexico, with a taxonomic review of the fossil camels [doctoral]: New York, Columbia University, 489 p.
- Brewster, B. 1956, The Santa Fe Group of north-central New Mexico, *in* Rosenzweig, A., ed., Southeastern Sangre de Cristo Mountains, New Mexico: New Mexico Geological Society, 7<sup>th</sup> Field Conference Guidebook, p. 115-121.
- Cabot, E.C., 1938, Fault border of the Sangre de Cristo Mountains north of Santa Fe, New Mexico: Journal of Geology, v. 46, p. 88-105.
- Cavazza, W., 1986, Miocene sediment dispersal in the central Española Basin, Rio Grande rift, New Mexico, USA: Sedimentary Geology, v. 51, p. 119-135.

- Dethier, D.P., Aldrich, M.J., Jr., and Shafiqullah, M., 1986, New K-Ar ages for Miocene volcanic rocks from the northeastern Jemez Mountains and Tejana Mesa, New Mexico: *Isochron/West*, no. 47, p. 12-14.
- Ekas, L.M., Ingersoll, R.V., Baldrige, W.S., and Shafiqullah, M., 1984, The Chama-El Rito Member of the Tesuque Formation, Española Basin, New Mexico, *in* Baldrige, W.S., Dickerson, P.W., Riecker, R.E., and Zidek, J., eds., *Rio Grande Rift: Northern New Mexico: New Mexico Geological Society, 35<sup>th</sup> Annual Field Conference Guidebook*, p. 137-143.
- Galusha, T., and Blick, J.C., 1971, Stratigraphy of the Santa Fe Group, New Mexico: *Bulletin of the American Museum of Natural History*, v. 144, 127 p.
- Ingersoll, R.V., Cavazza, W., Baldrige, W.S., and Shafiqullah, M., 1990, Cenozoic sedimentation and paleotectonics of north-central New Mexico: Implications for initiation and evolution of the Rio Grande rift: *Geological Society of America Bulletin*, v. 102, p. 1280-1296.
- Izett, G.A., and Obradovich, J.D., 2001,  $^{40}\text{Ar}/^{39}\text{Ar}$  ages of Miocene tuffs in basin-fill deposits (Santa Fe Group, New Mexico, and Troublesome Formation, Colorado) of the Rio Grande rift system: *The Mountain Geologist*, v. 38, no. 2, p. 77-86.
- Kautz, P.F., Ingersoll, R.V., Baldrige, W.S., Damon, P.E., and Shafiqullah, M., 1981, Geology of the Espinazo Formation (Oligocene), north-central New Mexico: *Geological Society of America Bulletin*, vol. 92, Part I (p. 980-983) and Part II (p. 2318-2400).
- Kempton, K.A., Kelley, S.A., and Lawrence, J.R., 2007, Geology of the northern Jemez Mountains, north-central New Mexico, *in* Kues, B.S., Kelley, S.A., and Lueth, W., eds., *Geology of the Jemez Region II: New Mexico Geological Society, 58<sup>th</sup> Annual Field Conference Guidebook*, p. 155-168.

Koning, D.J., 2002, revised July-2005, Geologic map of the Española 7.5-minute quadrangle, Rio Arriba and Santa Fe counties, New Mexico: New Mexico Bureau of Geology and Mineral Resources, Open-file Geologic Map OF-GM 54, scale 1:24,000.

Koning, D.J., and Aby, S., 2003, revised June-2004, Geologic map of the Velarde 7.5-minute quadrangle, Rio Arriba and Taos counties, New Mexico: New Mexico Bureau of Geology and Mineral Resources, Open-file Geologic Map OF-GM-79, scale 1:24,000.

Koning, D.J., Aby, S.B., and Dunbar, N., 2004, Middle-upper Miocene stratigraphy of the Velarde graben, north-central New Mexico: tectonic and paleogeographic implications, *in* Brister, B.S., Bauer, P.W., Read, A.S., and Lueth, V.W., eds., *Geology of the Taos Region: New Mexico Geological Society, 55<sup>th</sup> Annual Field Conference Guidebook*, p. 359-373.

Koning, D.J., and Aby, S.B., 2005, Proposed Members of the Chamita Formation, north-central New Mexico, *in* Lucas, S.G., Zeigler, K.E., Lueth, V.W., and Owen, D.E., eds., *Geology of the Chama Basin: New Mexico Geological Society, 56<sup>th</sup> Annual Field Conference Guidebook*, p. 258-278.

Koning, D.J., and Johnson, P.S., 2006, Locations and textural contrasts of Tesuque Formation lithostratigraphic units in the southern Española Basin, NM, and hydrogeologic implications, *in* McKinney, K.C., ed., *Geologic and Hydrogeologic Framework of the Española Basin - Proceedings of the 5th Annual Española Basin Workshop, Santa Fe, New Mexico, March 7-8, 2006: U.S. Geological Survey, Open-file Report 2006-1134*, p. 24.

Koning, D.J., Nyman, M., Horning, R., Eppes, M., and Rogers, S., 2002, revised June-2005, *Geology of the Cundiyo 7.5-min. quadrangle, Santa Fe County, New Mexico*, New Mexico Bureau of Geology and Mineral Resources, Open-file Geologic Map OF-GM 56, scale 1:24,000.

- Koning, D.J., Connell, S.D., Morgan, G.S., Peters, L., and McIntosh, W.C., 2005a, Stratigraphy and depositional trends in the Santa Fe Group near Española, north-central New Mexico: tectonic and climatic implications, *in* Lucas, S.G., Zeigler, K.E., Lueth, V.W., and Owen, D.E., eds., *Geology of the Chama Basin: New Mexico Geological Society, 56<sup>th</sup> Annual Field Conference Guidebook*, p. 237-257.
- Koning, D.J., Skotnicki, S., Moore, J., and Kelley, S., 2005b, Geologic map of the Chili 7.5-minute quadrangle, Rio Arriba county, New Mexico: New Mexico Bureau of Geology and Mineral Resources, Open-file Geologic Map OF-GM-81, scale 1:24,000.
- Koning, D.J., Connell, S.D., Slate, J.L., and Wan, E., 2007, Stratigraphic constraints for Miocene-age, vertical motion along the Santa Clara fault, Española Basin, north-central New Mexico, *in* Kues, B.S., Kelley, S.A., and Lueth, W., eds., *Geology of the Jemez Region II: New Mexico Geological Society, 58<sup>th</sup> Annual Field Conference Guidebook*, p. 225-238.
- Koning, D.J., McIntosh, W., and Dunbar, N., 2011, Geology of southern Black Mesa, Española Basin, New Mexico, *in* Koning, D.J., Karlstrom, K.E., Kelley, S.A., Lueth, V.W., and Aby, S.B., eds., *Geology of the Tusas Mountains and Ojo Caliente Area: New Mexico Geological Society, 62<sup>nd</sup> Annual Field Conference Guidebook*, p. 191-214.
- Kuhle, A., and Smith, G.A., 2001, Alluvial-slope deposition of the Skull Ridge Member of the Tesuque Formation, Española Basin, New Mexico: *New Mexico Geology*, p. 30-37.
- Manley, K., 1976, The Late Cenozoic History of the Española Basin, New Mexico [Ph.D. thesis]: University of Colorado, 1-171 p.
- Manley, K., 1977, Geologic map of the Cejita Member (new name) of the Tesuque Formation, Española Basin, New Mexico: U.S. Geological Survey Miscellaneous Field Studies Map MF-877, scale 1:24000.

- Manley, K., 1979, Tertiary and Quaternary stratigraphy of the Northeast Plateau, Española Basin, New Mexico, *in* Ingersoll, R.V., Woodward, L.A., and James, H.L., eds., Guidebook of Santa Fe Country: New Mexico Geological Society, 30<sup>th</sup> Annual Field Conference Guidebook, p. 231-236.
- May, J., 1980, Neogene geology of the Ojo Caliente-Rio Chama area, Española Basin, New Mexico [Ph.D. thesis]: Albuquerque, New Mexico, University of New Mexico, 204 p.
- May, J., 1984, Miocene stratigraphic relations and problems between the Abiquiu, Los Pinos, and Tesuque formations near Ojo Caliente, northern Española Basin, *in* Baldrige, W.S., Dickerson, P.W., Riecker, R.E., and Zidek, J., eds., Rio Grande Rift: Northern New Mexico: New Mexico Geological Society, 35<sup>th</sup> Annual Field Conference Guidebook, p. 129-135.
- McIntosh, W.C., and Quade, J., 1995, <sup>40</sup>Ar/<sup>39</sup>Ar geochronology of tephra layers in the Santa Fe Group, Española Basin, New Mexico, *in* Bauer, P.W., Kues, B.S., Dunbar, N.W., Karlstrom, K.E., and Harrison, B., eds., Geology of the Santa Fe Region: New Mexico Geological Society, 46<sup>th</sup> Annual Field Conference Guidebook, p. 279-284.
- Myer, C., and Smith, G.A., 2006, Stratigraphic analysis of the Yates #2 La Mesa well and implications for southern Española Basin tectonic history: New Mexico Geology, vol. 28, no. 3, p. 75-83.
- North American Commission on Stratigraphic Nomenclature, 2005, North American Stratigraphic Code: The American Association of Petroleum Geologists Bulletin, v. 89, no. 11, p. 1547-1591.
- Ogg, J.G., and Smith, A.G., 2004, The geomagnetic polarity time scale, *in* Gradstein, F.M., Ogg, J.G., and Smith, A.G., eds., A Geologic Time Scale, Cambridge, U.K., Cambridge University Press, p. 63-86.

- Sawyer, D. A., Shroba, R. R., Minor, S. A., and Thompson, R. A., 2002, Geologic map of the Tetilla Peak quadrangle, Santa Fe and Sandoval Counties, New Mexico: U. S. Geological Survey Miscellaneous Field Studies Map MF-2352, scale 1:24,000, version 1.0.
- Sauer, R.R., 1999, Petrochemistry and geochronology of plutons relative to tectonics in the San Pedro-Ortiz porphyry belt, New Mexico [M.S. thesis]: Boulder, University of Colorado, 115 p.
- Slate, J.L., Sarna-Wojcicki, A.M., Koning, D.J., Wan, E., Wahl, D.B., Connell, S.D., and Perkins, M.E., 2013, Upper Neogene tephrochronologic correlations of the Española Basin and Jemez Mountains volcanic field, northern Rio Grande rift, north-central New Mexico, *in* Hudson, M.R., and Grauch, V.J.S., eds., *New Perspectives on Rio Grande Rift Basins: From Tectonics to Groundwater: Geological Society of America Special Paper 494*, p. 303–322, doi:10.1130/2012.2494(12).
- Smith, G.A., 2000a, Recognition and significance of streamflow-dominated piedmont facies in extensional basins: *Basin Research*: v. 12, p. 399-411.
- Smith, G.A., 2000b, Oligocene onset of Santa Fe Group sedimentation near Santa Fe, New Mexico (abs.): *New Mexico Geology*, v. 22, p. 43.
- Smith, G.A., 2004, Middle to late Cenozoic development of the Rio Grande rift and adjacent regions in northern New Mexico, *in* Mack, G.H., and Giles, K.A., eds., *The Geology of New Mexico, A Geologic History: New Mexico Geological Society, Special Publication 11*, p. 331-358.
- Smith, G.A., Larsen, D., Harlan, S.S., McIntosh, W.C., Erskine, D.W., and Taylor, S., 1991; A tale of two volcanoclastic aprons: *Field guide to the sedimentology and physical volcanology*

of the Oligocene Espinazo Formation and Miocene Peralta Tuff, north-central New Mexico:

New Mexico Bureau of Mines and Mineral Resources, Bulletin 137, p. 87-103.

Spiegel, Z., and Baldwin, B., 1963, Geology and Water Resources of the Santa Fe Area, New Mexico: Washington, D.C., Geological Survey Water-Supply Paper 1525, 258 p.

Stearns, C.E., 1953, Early Tertiary volcanism in the Galisteo-Tonque area, north-central New Mexico: American Journal of Science, vol. 251, p. 415-452.

Tedford, R.H., and Barghoorn, S.F., 1993, Neogene stratigraphy and mammalian biochronology of the Española Basin, northern New Mexico: Vertebrate paleontology in New Mexico, New Mexico Museum of Natural History and Science, Bulletin 2, p. 159-168.

Figure A-1

Koning, Grauch, Connell, Ferguson, McIntosh, Slate, Wan, & Baldrige  
Structure and tectonic evolution of the Española Basin

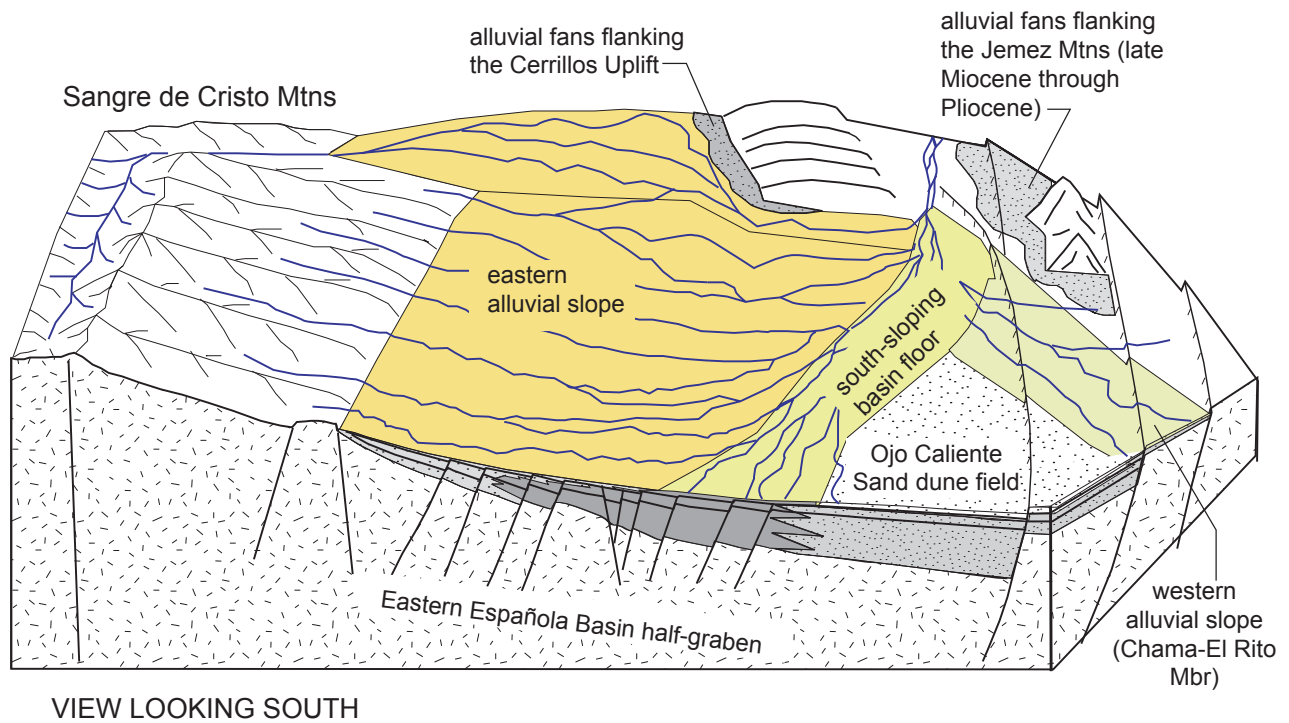

Figure A-1. Schematic block diagram illustrating depositional environments during Santa Fe Group deposition in the late middle Miocene. Late Miocene alluvial fans in the south-west basin are also included.

Figure A-2 (next page). Diagram illustrating ages and spatial stratigraphic relations of various units of the Santa Fe Group (schematically, from west to east across the Española Basin). Note that lithofacies of the Tesuque Formation (i.e., western alluvial slope, basin-floor, and eastern alluvial slope deposits, as explained in Appendix A) are shown in yellow and orange shades. The Nambé, Skull Ridge, and Pojoaque Members defined by Galusha and Blick (1971), which extend across the eastern alluvial slope-basin floor boundary, are delineated by blue lines. Tephra zones are depicted using cross-shaped stippled patterns. Age control derived primarily from the following works: Izett and Obradovich, 2001; McIntosh and Quade, 1995; Barghoorn, 1981, using the revised geomagnetic polarity time-scale of Ogg and Smith, 2004; Tedford and Barghoorn, 1993; Koning et al., 2005a, 2005b; Smith, 2000b; Kempter et al., 2007; Dethier et al., 1986; Aldrich and Dethier, 1990).

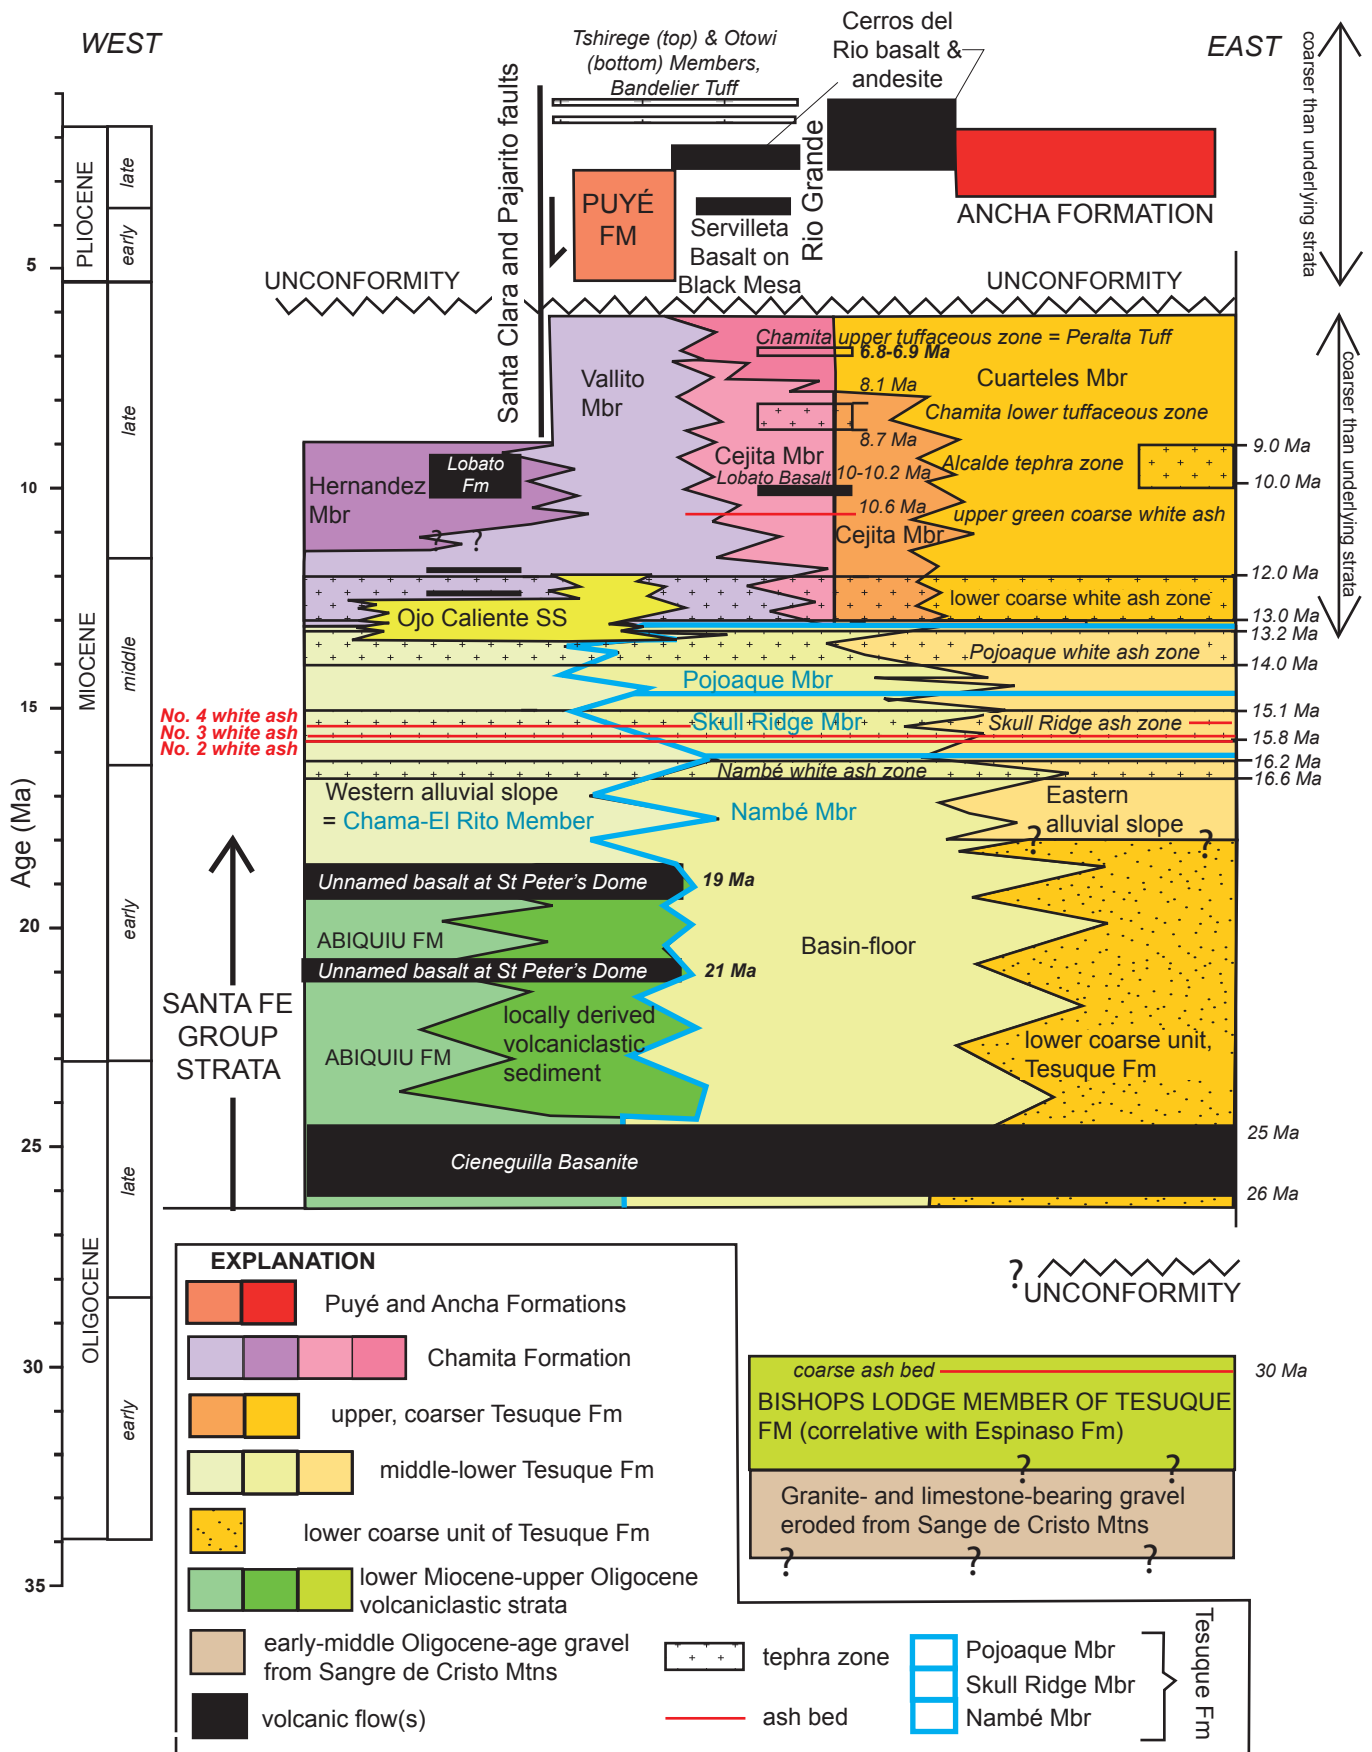

Figure A-3

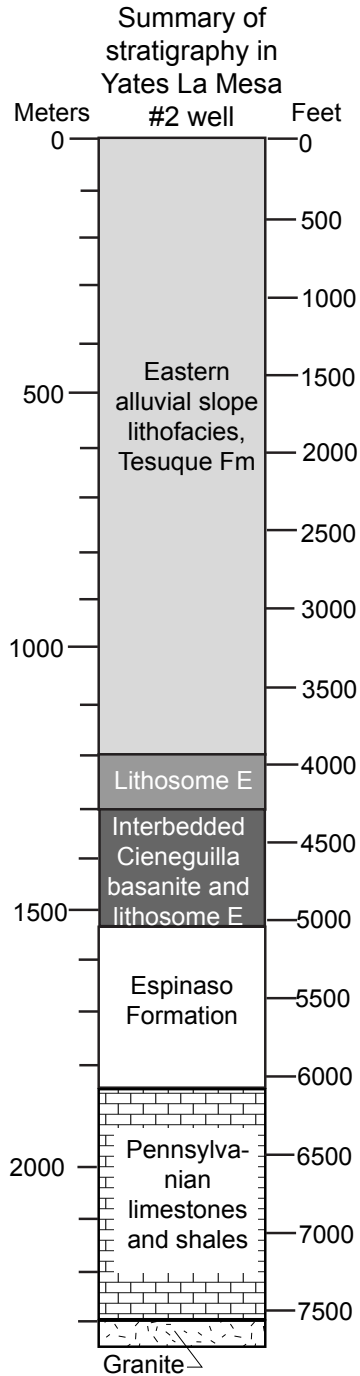

Figure A-3. Summary of stratigraphy of the Yates La Mesa No. 2 well. The well is located 8-9 km west of downtown Santa Fe (Plate 1, Figures 1 and 5 of manuscript). Figure modified slightly from Myer and Smith (2006) according to unpublished observations by Daniel Koning and David Sawyer (U.S. Geological Survey).

Figure A-4

Summary of stratigraphy  
in Castle & Wigzell  
#1 Kelley Federal Well

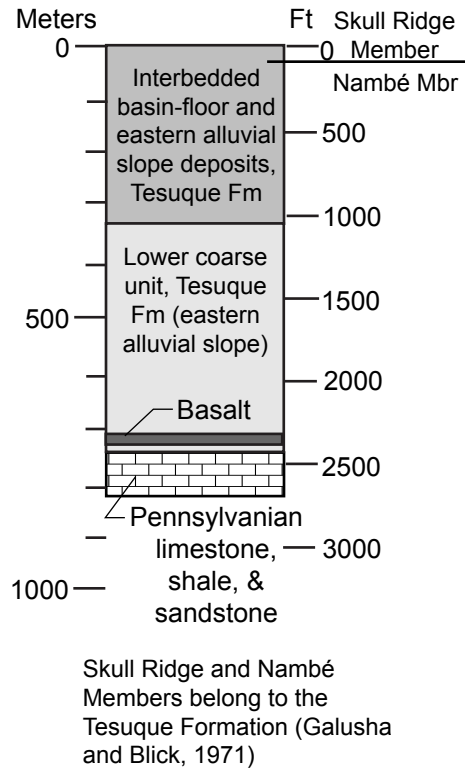

Figure A-4. Summary of stratigraphy of the Castle and Wigzell No. 1 Kelly Federal well, located 3.5 km southeast of Chimayo (Plate 1). Subsurface interpretations are from Koning et al. (2002) and David Sawyer (U.S. Geological survey; personal commun., 2005). The basalt at the base of the Santa Fe Group is correlated to the Cieneguilla basanite based on its stratigraphic position, but it does not match the composition of the Cerro Piñon basalt flow dated by Baldrige et al. (1980) (Nelia Dunbar, N.M. Bureau of Geology, written commun, 2007).
