# Supplementary material
Source: publisher figshare collection journal article supplement (https://gsapubs.figshare.com/ndownloader/files/23295149)
Supplement: Supplementary file 1 [file 23295149 › 2013139-App_C.pdf]

### Appendix C. Summary of $^{40}\text{Ar}/^{39}\text{Ar}$ results for tephra biotite or sanidine

| Sample               | Unit                                      | UTM coord zone<br>13; NAD 27) m            | Lab # | Irradiation | min                         | Mean Age |    |      |                    |
|----------------------|-------------------------------------------|--------------------------------------------|-------|-------------|-----------------------------|----------|----|------|--------------------|
|                      |                                           |                                            |       |             |                             | analysis | n  | MSWD | K/Ca $\pm 2\sigma$ |
| SCV-946FU-251102-djk | Cejita Mbr<br>(Chamita Fm)                | 3,987,345 $\pm$ 20 N<br>400,880 $\pm$ 20 E | 54283 | NM-170      | Biotite, single<br>crystal  | Mean     | 6  | 1.0  | 2.3 $\pm$ 1.7      |
| SCV-948-251102-djk   | Cejita Mbr<br>(Chamita Fm),               | 3,987,440 $\pm$ 20 N<br>400,530 $\pm$ 20 E | 54435 | NM-172      | Biotite, single<br>crystal  | Mean     | 8  | 2.5  | 0.5 $\pm$ 0.2      |
| SCV-318-230702-djk   | Cuarteles Mbr<br>(Tesuque Fm)             | 3,988,340 $\pm$ 15 N<br>409,670 $\pm$ 15 E | 54436 | NM-172      | Biotite, single<br>crystal  | Mean     | 14 | 3.9  | 0.3 $\pm$ 0.0      |
| SCV-1014-051202-djk  | Ojo Caliente<br>Sandstone<br>(Tesuque Fm) | 3,986,170 $\pm$ 20 N<br>398,980 $\pm$ 20 E | 54437 | NM-172      | Biotite, single<br>crystal  | Mean     | 12 | 2.7  | 0.6 $\pm$ 1.7      |
| SCV-1154-160103-djk  | Cuarteles Mbr<br>(Tesuque Fm)             | 3,996,440 $\pm$ 20 N<br>411,160 $\pm$ 20 E | 54445 | NM-172      | Biotite, single<br>crystal  | Mean     | 14 | 4.0  | 5.6 $\pm$ 13.7     |
| Set-26-230807-djk    | lower coarse<br>unit (Tesuque<br>Fm)      | 3,958,665 $\pm$ 8 N<br>419,464 $\pm$ 8 E   | 59156 | NM-226      | Sanidine,<br>single crystal | Mean     | 12 | 4.0  | 38.4 $\pm$ 16.2    |

#### Sample preparation and irradiation:

Minerals separated with standard heavy liquid, Franz Magnetic and hand-picking techniques.

Neutron flux monitor Fish Canyon Tuff sanidine (FC-2). Assigned age = 28.02 Ma (Renne et al, 1998).

#### Instrumentation:

Analyses performed on a Mass Analyzer Products 215-50 mass spectrometer on line with automated all-metal extraction system.

Biotite and groundmass concentrates step-heated, using a Mo double-vacuum resistance furnace.

Sanidine, biotite and flux monitor fused or step-heated by a 50 watt Synrad CO2 laser.

#### Notes:

Fm = Formation; Mbr = Member

Any use of trade names is for descriptive purposes only and does not imply endorsement by the U.S. Government.

#### Reference:

Renne, P.R., C.C. Swisher, A.L. Deino, D.B. Karner, T.L. Owens and D.J. Depaolo, 1998, Intercalibration of standards: absolute ages and uncertainties in  $^{40}\text{Ar}/^{39}\text{Ar}$  dating: *Chemical Geology*, v. 145, p.117-152.

**Appendix C. Summary of  $^{40}\text{Ar}/^{39}\text{Ar}$  results for groundmass concentrate from basalts**

| Sample              | Unit                                                                          | UTM coord (zone<br>13; NAD 27) m | Lab #    | Irradiation | min                       | Preferred Age |   |                    |      |                    |
|---------------------|-------------------------------------------------------------------------------|----------------------------------|----------|-------------|---------------------------|---------------|---|--------------------|------|--------------------|
|                     |                                                                               |                                  |          |             |                           | analysis      | n | % $^{39}\text{Ar}$ | MSWD | K/Ca $\pm 2\sigma$ |
| ML-767-190404-djk   | 2.5-3.0 m-wide<br>basalt dike                                                 | 390,330 E<br>3,998,450 N         | 55542-01 | NM-187J     | Groundmass<br>Concentrate | Plateau       | 7 | 95.3               | 2.4  | 0.1 $\pm$ 0.1      |
| V-63-061103-djk     | Lower of two flows<br>located on NE part<br>of Black Mesa                     | 412,130 E<br>4,007,050 N         | 55545-01 | NM-187J     | Groundmass<br>Concentrate | Plateau       | 6 | 79.2               | 1.6  | 0.0 $\pm$ 0.0      |
| 120304cl-djk        | Fm basalt flow<br>interbedded in<br>Vallito Mbr<br>(Chamita Fm)               | 396,250 E<br>3,990,570 N         | 55546-01 | NM-187J     | Groundmass<br>Concentrate | Plateau       | 4 | 77.4               | 2.3  | 0.2 $\pm$ 0.2      |
| 110604c-djk         | Top of 18 m-thick<br>Servilleta Basalt at<br>south tip of Black<br>Mesa       | 400,970 E<br>3,996,100 N         | 55547-01 | NM-187J     | Groundmass<br>Concentrate | Plateau       | 7 | 96.1               | 1.2  | 0.1 $\pm$ 0.2      |
| 120304a-djk         | Bomb found in<br>silty sand of the<br>Vallito Mbr,<br>lowermost<br>Chamita Fm | 394,620 E<br>3,989,680 N         | 55548-01 | NM-187K     | Groundmass<br>Concentrate | Plateau       | 5 | 62.2               | 3.9  | 0.2 $\pm$ 0.1      |
| SCV-1584-040603-djk | Servilleta Basalt<br>from footwall of La<br>Mesita fault; upper<br>flow.      | 414,595 E<br>4,004,755 N         | 55549-01 | NM-187K     | Groundmass<br>Concentrate | Plateau       | 7 | 95.1               | 1.4  | 0.1 $\pm$ 0.2      |

**Sample preparation and irradiation:**

Neutron flux monitor Fish Canyon Tuff sanidine (FC-2). Assigned age = 28.02 Ma (Renne et al, 1998).

**Instrumentation:**

Analyses performed on a Mass Analyzer Products 215-50 mass spectrometer on line with automated all-metal extraction system.

Biotite and groundmass concentrates step-heated, using a Mo double-vacuum resistance furnace.

Sanidine, biotite and flux monitor fused or step-heated by a 50 watt Synrad CO<sub>2</sub> laser.

**Notes:**

Fm = Formation; Mbr = Member

Any use of trade names is for descriptive purposes only and does not imply endorsement by the U.S. Government.

**Reference:**

Renne, P.R., C.C. Swisher, A.L. Deino, D.B. Karner, T.L. Owens and D.J. Depaolo, 1998, Intercalibration of standards: absolute ages and uncertainties in  $^{40}\text{Ar}/^{39}\text{Ar}$  dating: Chemical Geology, v. 145, p.117-152.

# $^{40}\text{Ar}/^{39}\text{Ar}$ Geochronology Results from Ojo Caliente, Chili and Las Tablas Quadrangles

By

Lisa Peters

NOVEMBER 17, 2009

Prepared for

Dan Koning

NM Bureau of Geology and Mineral Resources  
Socorro, NM 87801

NEW MEXICO  
GEOCHRONOLOGY RESEARCH LABORATORY  
(NMGRL)

CO-DIRECTORS

DR. MATTHEW T. HEIZLER

DR. WILLIAM C. MCINTOSH

LABORATORY TECHNICIAN

LISA PETERS

Internal Report #: NMGRL-IR-557

## Introduction

Samples from the Ojo Cliente, Chili and Las Tablas quadrangles were submitted by Dan Koning as part of the STATEMAP program. A variety of material was separated from these samples, some were determined to be undatable. The separated phase and data is summarized below.

**Table 1. Brief summary of results.**

| Sample                   | Phase                  | Age $\pm 2\sigma$ (Ma) | Comments                          |
|--------------------------|------------------------|------------------------|-----------------------------------|
| GTM-536-djk              | Sanidine               | 25.05 $\pm$ 0.06       | Gaussian distribution             |
| GTM-528-djk              | Sanidine               | 22.48 $\pm$ 0.07       | nearly Gaussian distribution      |
| GTM-439-djk              | Sanidine               | 24.93 $\pm$ 0.25       | possible altered crystals removed |
| OC-188a0011004-djk       | Sanidine/Plagioclase   | No age assigned        | younger than 16.7 $\pm$ 2.6 Ma    |
| GTM-627-djk              | Biotite                | 22.88 $\pm$ 0.07       | concordant age spectrum           |
| WRC-82                   | Biotite                | 29.98 $\pm$ 0.09       | somewhat concordant               |
| WRC-37-111006            | Biotite                | 11.72 $\pm$ 0.62       | somewhat disturbed                |
| OC-808-180805-djk        | Biotite                | 23.18 $\pm$ 0.48       | nearly Gaussian distribution      |
| OC-759-300605-djk        | Biotite                | 23.73 $\pm$ 0.30       | nearly Gaussian distribution      |
| Unit-5c-NWchili-sect-431 | Biotite                | 10.97 $\pm$ 0.47       | somewhat Gaussian distribution    |
| OC-379-111104-djk        | Biotite                | -                      | 10 Ma spread in ages              |
| GTM-625-djk              | Groundmass Concentrate | 24.92 $\pm$ 0.34       | nearly concordant                 |
| OC-740-130505            | Groundmass Concentrate | 10.55 $\pm$ 0.45       | concordant                        |
| GTM-260805               | Groundmass Concentrate | 4.59 $\pm$ 0.12        | somewhat discordant               |

|                   |                        |                 |                                  |
|-------------------|------------------------|-----------------|----------------------------------|
| TJ basalt         | Groundmass Concentrate | 4.79±0.15       | somewhat discordant              |
| J54B              | Groundmass Concentrate | 4.67±0.19       | nearly concordant                |
| ER-76             | Groundmass Concentrate | 21.5±1.1        | nearly concordant, low precision |
| GSO602            | Groundmass Concentrate | 17.5±1.2        | somewhat discordant              |
| ER-43             | Groundmass Concentrate | 14.2±1.9        | isochron age                     |
| 091206-d          | Groundmass Concentrate | 9.0±1.0         | isochron age                     |
| WRC-68            | Groundmass Concentrate | No age assigned | highly discordant                |
| GTM-490-djk       | Groundmass Concentrate | No age assigned | highly discordant                |
| OC-908-208805-djk | Groundmass Concentrate | No age assigned | highly discordant                |

## **<sup>40</sup>Ar/<sup>39</sup>Ar Analytical Methods and Results**

Samples were initially prepared by crushing, sieving and then washing away clay-sized material. Sanidine was separated by cleaning in hydrofluoric acid, rinsing in distilled water and then separating with heavy liquid. Biotite was separated with a magnetic separator, heavy liquid and hand picking. The groundmass concentrates were prepared by crushing, sieving, cleaning with hydrochloric acid and removing of phenocrysts with hand picking or by using a magnetic separator. The mineral separates and monitors (Fish Canyon tuff sanidine, 28.02, Renne et al., 1998) were loaded into aluminum discs and irradiated for 7 hours at the Nuclear Science Center in College Station, Texas.

The sanidine and monitors were analyzed by the single-crystal-laser-fusion method. Where xenocrystic contaminants were a possibility, biotite was step-heated as single crystals or small aliquots with a defocused CO<sub>2</sub> laser. The biotite and groundmass concentrate were analyzed with the incremental heating age spectrum method, heated with either the furnace or the CO<sub>2</sub> laser equipped with a top hat lens. Abbreviated

analytical methods for the dated sample are given in Table 2, and details of the overall operation of the New Mexico Geochronology Research Laboratory is provided in the Appendix. The age results are summarized in Tables 1 and 2 and the argon isotopic data are given in Tables 3 -5.

Three of the four sanidine separates yielded Gaussian or near-Gaussian populations (GTM-536-djk, GTM-528-djk, GTM-439-djk, Figures 1-3 respectively). These samples also have high radiogenic yields and K/Ca values typical of sanidine. The fourth sample analyzed as single crystals (OC-188a-01104-djk, Figure 4) yielded apparent ages ranging from 7.6 Ma to 40.3 Ma, radiogenic yields from 25.3% to 109.2% and only three crystals with K/Ca values indicative of sanidine. The rest of the crystals have K/Ca values less than one which is indicative of plagioclase.

Of the three biotite samples analyzed by the furnace step-heating method, only one, GTM-627, yielded a concordant age spectrum with high radiogenic yields and typical K/Ca values (Figure 5). The other two (WRC-82 and WRC-37-111006, Figures 6 and 7, respectively) yielded somewhat disturbed age spectra. WRC-82 yielded slightly older apparent ages in the early heating steps, probably caused by slight excess Ar. The remaining portion of the age spectrum (65.9% of the  $^{39}\text{Ar}$  released) is nearly concordant and this is the portion used to calculate the weighted mean age of  $29.98 \pm 0.09$  Ma. WRC-37-111006-djk has lower radiogenic yields (2.2% to 28.6%), lower K/Ca values (0.36-11.1) and a less concordant age spectrum than the other two but a weighted mean age of  $11.72 \pm 0.62$  Ma is calculated from all steps.

Eleven to eighteen aliquots containing one or two crystals of biotite from samples OC-808-180805-djk, OC-759-300605-djk, Unit-5c-NWchili-sect-djk and OC-379-111004-djk were step-heated with the CO<sub>2</sub> laser. The low power A steps were used to drive off the atmospheric gas and increase the radiogenic yield and thus precision of the B steps. The more radiogenic B steps are shown plotted on Figures 8-11. The radiogenic yields of the OC-808-180805-djk and OC-759-300605-djk are all above 20%. All fifteen biotite crystals of OC-808-180805-djk were used to calculate the weighted mean age of  $23.18 \pm 0.47$  Ma (Figure 8). Eleven of the fourteen OC-759-300605-djk crystals were used to calculate a weighted mean age of  $23.73 \pm 0.30$  Ma (Figure 9). Two analyses

with very little  $^{39}\text{Ar}$  were excluded from the calculation and one small crystal with a low radiogenic yield were excluded. All but one analysis of Unit-5c-NWChili-Sect-djk, which was considered to be a xenocrystic, were used to calculate the weighted mean age of  $10.97 \pm 0.47$  Ma (Figure 10). The 10 Ma spread in ages of the analyzed OC-379-1104-djk crystals ( $9.93 \pm 0.84$  Ma to  $19.8 \pm 2.0$  Ma, Figure 11) is approximately twice the spread of the other biotite samples analyzed as single crystals. A weighted mean age was not calculated for this sample.

The quality of the twelve groundmass concentrate analyses is highly variable, ranging from fairly well-behaved to highly disturbed. The age spectra for groundmass concentrates GTM-625-djk, OC-740-130505 and J-54B (Figures 12-14, respectively) are the most concordant with 98.1%, 100.0% and 100.0% (respectively) of the  $^{39}\text{Ar}$  released being used to calculate a weighted mean age for the sample. It is noted that the radiogenic yields for OC-740-130505 are less than 20%, lower than expected for a sample of this age; which results in higher than normal errors on the individual steps. Groundmass concentrates GTM-260805-djk and TJ basalt (Figures 15 and 16) reveal young apparent ages in the early heating steps that are often indicative of alteration and accompanying  $^{40}\text{Ar}$  loss; weighted mean ages for these samples are calculated from the more concordant later portions of the spectra ( $4.59 \pm 0.12$  Ma and  $4.79 \pm 0.15$  Ma, respectively). Four of the groundmass concentrates yielded saddle-shaped age spectra (ER-76, GSO 602, 091206-d and ER-43-djk, Figures 17-20). This can often be indicative of excess  $^{40}\text{Ar}$  (Zeitler, 1987). The inverse isochrons for ER-76 and GSO 602 do not have elevated  $^{40}\text{Ar}/^{36}\text{Ar}$  ratios ( $>295.5$ ). Weighted mean ages for these samples have therefore been calculated from the flatter mid-portion of the age spectra ( $21.5 \pm 1.1$  Ma and  $17.5 \pm 1.2$  Ma, respectively). These portions contain 89.4% and 91.8% of the  $^{39}\text{Ar}$  released. 091206-d and ER-43-djk have slightly elevated  $^{40}\text{Ar}/^{36}\text{Ar}$  ratios ( $299.4 \pm 2.5$  and  $298.9 \pm 5.7$ , respectively) so we have assigned the isochron ages to these two samples ( $9.0 \pm 1.0$  Ma and  $14.2 \pm 1.9$  Ma, respectively). It is noted that the radiogenic yields for both samples are less than 20%, the data is therefore highly affected by excess Ar. The remaining three groundmass analyses are so highly disturbed that no age is assigned to them (WRC-68, GTM-490-djk and OC-908-280805-djk, Figures 21-23, respectively).

## Discussion

The data obtained from these samples varies greatly in quality, from precise, very reliable to data of such low quality that we were unable to assign an age to the sample. The sanidine from samples GTM-536-djk, GTM-528-djk and GTM-439-djk yielded precise and reliable ages for the flows and intrusions from which they were separated ( $25.05 \pm 0.06$  Ma,  $22.48 \pm 0.07$  Ma, and  $24.93 \pm 0.25$  Ma, respectively). The crystals eliminated from the GTM-439-djk data are younger, less radiogenic and have smaller signals than the other crystals and have possibly undergone alteration and minor Ar loss. We are unable to assign an age to OC-188a-01104-djk. The large spread in ages (7.6 Ma to 40.3 Ma) without a clear main population implies significant xenocrystic contamination. The low radiogenic yields of many of the crystals (as low as 25.3%) implies that there may have been alteration and accompanying Ar loss, making the ages of those crystals suspect (youngest four crystals all have radiogenic yields below 80%). We are hesitant to assign the age of the youngest crystal as the maximum age of the unit.

The biotite samples analyzed by the furnace incremental heating age spectrum method (GTM-627-djk, WRC-82, and WRC-37-111006) provide reliable ages for the units from which they were sampled. GTM-627-djk provides an accurate eruption age ( $22.88 \pm 0.07$  Ma) for the rhyodacite flow, biotite from WRC-82 ( $29.98 \pm 0.09$  Ma) clast suggests that the clast came from the San Juan volcanic field rather than the Jemez, and that from WRC-37-111006-djk provides an eruption age ( $11.72 \pm 0.62$  Ma) for the tephra rip-up clasts and therefore a maximum age for the unit containing the clasts.

Three of the four biotite samples that were analyzed as single or few crystal aliquots provided fairly precise eruption ages for the ash and tephra samples from which they were sampled. We point out that although the age of OC-808-180805-djk ( $23.18 \pm 0.48$  Ma), from the stratigraphically lower Abiquiu Formation is younger age than

the age for the stratigraphically higher OC-759-300605-djk ( $23.73 \pm 0.30$  Ma, sampled in the Tesuque Formation), these ages do agree within error. We are unable to assign an age to sample OC-379-1104-djk due to the 10 Ma spread in ages and low radiogenic yields (<25% radiogenic). The large spread in ages is suggestive of contaminants and we would therefore typically assign the age of the young crystals as an eruption age. In this case however, the low radiogenic yields are suggestive of alteration and accompanying Ar loss, making the youngest apparent ages suspect.

The basaltic dikes and flows analyzed as groundmass concentrates yielded reliable, if in some cases low precision, eruption dates (GTM-625-djk, OC-740-130505, GTM-260805-djk, J-54B, TJ basalt, ER-76, and 091206-d) with the exception of GTM-490-djk and OC-908-280805-djk, which yielded such highly disturbed age spectra that we were unable to assign an eruption age. The groundmass concentrate obtained from a basaltic bomb in the Chama-El Rito Member (ER-43) provides a fairly low precision ( $14.2 \pm 1.9$  Ma) age for the Chama-El Rito member in the eastern half of the El Rito quadrangle. We are unable to assign an age to sample WRC-68, a basalt bomb, and thus constrain the age of the Vallito Member of the Chamita Formation.

## References Cited

- McIntosh, W.C., and Chapin, C.E., 2004, Geochronology of the central Colorado volcanic field: New Mexico Bureau of Geology & Mineral Resources Bulletin 160, p. 205-238.
- Renne, P.R., C.C. Swisher, A.L. Deino, D.B. Karner, T.L. Owens and D.J. Depaolo, 1998, Intercalibration of standards: absolute ages and uncertainties in  $^{40}\text{Ar}/^{39}\text{Ar}$  dating. Chem. Geol., v. 145, p.117-152.
- Steiger, R.H., and Jäger, E., 1977. Subcommission on geochronology: Convention on the use of decay constants in geo- and cosmochemistry. Earth and Planet. Sci. Lett., 36, 359-362.
- Taylor, J.R., 1982. An Introduction to Error Analysis: The Study of Uncertainties in Physical Measurements,. Univ. Sci. Books, Mill Valley, Calif., 270 p.
- Zeitler, P.K., 1987, Argon diffusion in partially outgassed alkali feldspars: insights from  $^{40}\text{Ar}/^{39}\text{Ar}$  analysis. Chem. Geol. V.65, p.167-181.

**Table 2. Summary of  $^{40}\text{Ar}/^{39}\text{Ar}$  results and analytical methods**

| Sample             | Lab # | Irradiation | mineral                | age analysis       | steps/analyses | Age   | $\pm 2\sigma$ | MSWD |                 |
|--------------------|-------|-------------|------------------------|--------------------|----------------|-------|---------------|------|-----------------|
| GTM-536-djk        | 57801 | NM-217      | sanidine               | laser total fusion | 15             | 25.05 | 0.06          | 0.98 |                 |
| GTM-528-djk        | 57802 | NM-217      | sanidine               | laser total fusion | 15             | 22.48 | 0.08          | 2.35 |                 |
| GTM-439-djk        | 57800 | NM-217      | sanidine               | laser total fusion | 12             | 24.93 | 0.25          | 1.53 |                 |
| OC-188a-011004-djk | 57174 | NM-208      | sanidine/plagioclase   | laser total fusion | -              | -     | -             | -    | no age assigned |
| GTM-627            | 57852 | NM-217      | biotite                | furnace step-heat  | 12             | 22.88 | 0.07          | 0.87 |                 |
| WRC-82             | 57849 | NM-217      | biotite                | furnace step-heat  | 9              | 29.98 | 0.09          | 0.09 |                 |
| WRC-37-111006      | 57851 | NM-217      | biotite                | furnace step-heat  | 10             | 11.72 | 0.62          | 4.87 |                 |
| OC-808-180805-djk  | 57206 | NM-208      | biotite                | laser step heat    | 16             | 23.18 | 0.48          |      |                 |
| OC-759-300605-djk  | 57205 | NM-208      | biotite                | laser step heat    | 12             | 23.73 | 0.30          |      |                 |
| NW-unit5c-sect-djk | 57850 | NM-217      | biotite                | laser step heat    | 17             | 10.97 | 0.47          |      |                 |
| OC-379-111104-djk  | 57207 | NM-208      | biotite                | laser step heat    | -              | -     | -             | -    |                 |
| GTM-625-djk        | 57808 | NM-217      | groundmass concentrate | furnace step-heat  | 6              | 24.92 | 0.34          | 2.31 |                 |
| OC-740-130505      | 57143 | NM-208      | groundmass concentrate | furnace step-heat  | 9              | 10.55 | 0.45          | 0.36 |                 |
| GTM-260805-djk     | 57183 | NM-208      | groundmass concentrate | furnace step-heat  | 6              | 4.59  | 0.12          | 6.67 |                 |
| J54B               | 57452 | NM-212      | groundmass concentrate | furnace step-heat  | 9              | 4.67  | 0.19          | 1.89 |                 |
| TJ basalt          | 57142 | NM-208      | groundmass concentrate | furnace step-heat  | 7              | 4.79  | 0.15          | 2.94 |                 |
| ER-76              | 57814 | NM-217      | groundmass concentrate | furnace step-heat  | 7              | 21.5  | 1.1           | 1.14 |                 |
| ER-43              | 57815 | NM-217      | groundmass concentrate | furnace step-heat  | 9              | 14.20 | 1.90          | 4.74 | isochron        |
| 091206-d           | 57806 | NM-217      | groundmass concentrate | furnace step-heat  | 9              | 9.0   | 1.0           | 3.80 |                 |
| GSO602             | 57805 | NM-217      | groundmass concentrate | furnace step-heat  | 8              | 17.5  | 1.2           | 5.62 |                 |
| WRC-68             | 57807 | NM-217      | groundmass concentrate | furnace step-heat  | -              | -     | -             | -    |                 |
| GTM-490-djk        | 57804 | NM-217      | groundmass concentrate | furnace step-heat  | -              | -     | -             | -    |                 |
| OC-908-280805-djk  | 57453 | NM-212      | groundmass concentrate | furnace step-heat  | -              | -     | -             | -    |                 |

**Sample preparation and irradiation:**

Minerals separated with standard heavy liquid, Franz Magnetic and hand-picking techniques.

Samples in NM-208 and 217 irradiated in a machined Aluminum tray for 7 hours in D-3 position, Nuclear Science Center, College Station, TX.

Samples in NM-212 irradiated in a machined Aluminum tray for 10 hours in C.T. position at the USGS TRIGA reactor in Denver, Colorado.

Neutron flux monitor Fish Canyon Tuff sanidine (FC-2). Assigned age = 28.02 Ma (Renne et al, 1998).

**Instrumentation:**

Analyses performed on a Mass Analyzer Products 215-50 mass spectrometer on line with automated all-metal extraction system.

Biotite and groundmass concentrates step-heated, using a Mo double-vacuum resistance furnace.

Sanidine, biotite and flux monitor fused or step-heated by a 50 watt Synrad CO<sub>2</sub> laser.

**Analytical parameters:**

Electron multiplier sensitivity averaged  $8.73\text{e-}17 \times 10^{-17}$  moles/pA for NM-208 furnace analyses,  $1.0\text{e-}16$  moles/pA for NM-212 furnace analyses and  $7\text{e-}17$  for NM-217 furnace analyses. and  $3.35 \times 10^{-17}$  for the sanidine analysis and  $4.68\text{e-}17\text{e-}17$  for laser biotite analyses from NM-208 and  $5.58\text{e-}17$  for laser biotite analyses from NM-217.

Total system blank and background averaged 1430, 13.3, 5.5, 6.8,  $27.4 \times 10^{-18}$  moles at masses 40, 39, 38, 37 and 36, respectively for the furnace analyses.

Total system blank and background averaged 375, 8.6, 2.2, 2.8,  $41.9 \times 10^{-18}$  moles at masses 40, 39, 38, 37 and 36 for the laser analyses.

J-factors determined by CO<sub>2</sub> laser-fusion of 6 single crystals from each of 10 radial positions around the irradiation tray.

Decay constants and isotopic abundances after Steiger and Jäger (1977).

**Table 3.  $^{40}\text{Ar}/^{39}\text{Ar}$  analytical data.**

| ID                                                                                               | $^{40}\text{Ar}/^{39}\text{Ar}$ | $^{37}\text{Ar}/^{39}\text{Ar}$ | $^{36}\text{Ar}/^{39}\text{Ar}$<br>( $\times 10^{-3}$ ) | $^{39}\text{Ar}_K$<br>( $\times 10^{-15}$ mol) | K/Ca              | $^{40}\text{Ar}^*$<br>(%) | Age<br>(Ma) | $\pm 1\sigma$<br>(Ma) |
|--------------------------------------------------------------------------------------------------|---------------------------------|---------------------------------|---------------------------------------------------------|------------------------------------------------|-------------------|---------------------------|-------------|-----------------------|
| <b>GTM-439-djk</b> , Sanidine, J=0.0008023 $\pm$ 0.05%, D=1.004 $\pm$ 0.001, NM-217C, Lab#=57800 |                                 |                                 |                                                         |                                                |                   |                           |             |                       |
| 14                                                                                               | 17.84                           | 0.0140                          | 4.840                                                   | 0.293                                          | 36.4              | 92.0                      | 23.6        | 1.0                   |
| 07                                                                                               | 17.38                           | 0.0267                          | 2.510                                                   | 0.180                                          | 19.1              | 95.7                      | 23.9        | 1.6                   |
| 15                                                                                               | 17.60                           | 0.0083                          | 2.809                                                   | 0.441                                          | 61.7              | 95.3                      | 24.11       | 0.69                  |
| 02                                                                                               | 17.62                           | 0.0077                          | 2.829                                                   | 0.765                                          | 66.2              | 95.3                      | 24.13       | 0.39                  |
| 05                                                                                               | 17.36                           | 0.0017                          | 0.6676                                                  | 1.611                                          | 293.9             | 98.9                      | 24.67       | 0.20                  |
| 12                                                                                               | 17.58                           | 0.0040                          | 1.376                                                   | 0.786                                          | 127.8             | 97.7                      | 24.69       | 0.41                  |
| 09                                                                                               | 17.59                           | 0.0064                          | 1.244                                                   | 0.500                                          | 79.9              | 97.9                      | 24.76       | 0.61                  |
| 06                                                                                               | 17.57                           | 0.0009                          | 1.130                                                   | 1.172                                          | 563.0             | 98.1                      | 24.78       | 0.27                  |
| 04                                                                                               | 17.58                           | 0.0087                          | 0.9847                                                  | 0.500                                          | 58.3              | 98.3                      | 24.85       | 0.61                  |
| 11                                                                                               | 17.46                           | 0.0035                          | 0.5549                                                  | 0.717                                          | 146.4             | 99.1                      | 24.86       | 0.43                  |
| 13                                                                                               | 17.64                           | 0.0010                          | 0.8796                                                  | 1.007                                          | 534.6             | 98.5                      | 24.98       | 0.30                  |
| 08                                                                                               | 17.97                           | 0.0095                          | 1.798                                                   | 0.625                                          | 53.5              | 97.0                      | 25.06       | 0.49                  |
| 10                                                                                               | 17.90                           | 0.0012                          | 0.9413                                                  | 0.848                                          | 425.5             | 98.4                      | 25.33       | 0.40                  |
| 03                                                                                               | 17.58                           | -0.0050                         | -0.5711                                                 | 0.624                                          | -                 | 101.0                     | 25.51       | 0.50                  |
| 01                                                                                               | 18.09                           | 0.0059                          | 0.7819                                                  | 1.210                                          | 86.7              | 98.7                      | 25.67       | 0.27                  |
| <b>Mean age <math>\pm 2\sigma</math></b>                                                         | n=12                            | MSWD=1.53                       |                                                         |                                                | 221.4 $\pm$ 379.7 |                           | 24.93       | 0.25                  |
| <b>GTM-536-djk</b> , Sanidine, J=0.0008007 $\pm$ 0.05%, D=1.004 $\pm$ 0.001, NM-217C, Lab#=57801 |                                 |                                 |                                                         |                                                |                   |                           |             |                       |
| 06                                                                                               | 18.73                           | 0.0037                          | 4.926                                                   | 1.856                                          | 137.8             | 92.2                      | 24.78       | 0.18                  |
| 14                                                                                               | 17.54                           | 0.0044                          | 0.6575                                                  | 3.661                                          | 116.4             | 98.9                      | 24.885      | 0.099                 |
| 11                                                                                               | 17.54                           | 0.0045                          | 0.5734                                                  | 2.812                                          | 113.2             | 99.0                      | 24.93       | 0.12                  |
| 03                                                                                               | 17.98                           | 0.0017                          | 2.004                                                   | 2.285                                          | 304.9             | 96.7                      | 24.94       | 0.14                  |
| 01                                                                                               | 17.61                           | 0.0009                          | 0.7394                                                  | 3.019                                          | 545.9             | 98.8                      | 24.95       | 0.11                  |
| 08                                                                                               | 17.76                           | 0.0062                          | 1.173                                                   | 1.692                                          | 81.7              | 98.1                      | 24.99       | 0.19                  |
| 12                                                                                               | 17.57                           | 0.0052                          | 0.5100                                                  | 2.906                                          | 97.3              | 99.1                      | 24.99       | 0.12                  |
| 04                                                                                               | 31.13                           | 0.0041                          | 46.35                                                   | 4.866                                          | 124.1             | 56.0                      | 25.01       | 0.19                  |
| 05                                                                                               | 17.68                           | 0.0065                          | 0.8120                                                  | 4.411                                          | 78.5              | 98.6                      | 25.022      | 0.082                 |
| 10                                                                                               | 17.57                           | 0.0049                          | 0.3305                                                  | 2.172                                          | 103.2             | 99.4                      | 25.07       | 0.15                  |
| 02                                                                                               | 17.82                           | 0.0064                          | 1.054                                                   | 2.000                                          | 79.1              | 98.3                      | 25.12       | 0.17                  |
| 13                                                                                               | 17.93                           | 0.0019                          | 1.379                                                   | 2.576                                          | 274.4             | 97.7                      | 25.13       | 0.13                  |
| 09                                                                                               | 17.67                           | 0.0026                          | 0.4646                                                  | 7.782                                          | 192.9             | 99.2                      | 25.151      | 0.056                 |
| 07                                                                                               | 18.24                           | 0.0019                          | 2.395                                                   | 4.274                                          | 262.4             | 96.1                      | 25.158      | 0.093                 |
| 15                                                                                               | 17.92                           | 0.0058                          | 1.216                                                   | 1.768                                          | 87.7              | 98.0                      | 25.20       | 0.19                  |
| <b>Mean age <math>\pm 2\sigma</math></b>                                                         | n=15                            | MSWD=0.98                       |                                                         |                                                | 173.3 $\pm$ 256.1 |                           | 25.050      | 0.063                 |

| ID                                                                                               | $^{40}\text{Ar}/^{39}\text{Ar}$ | $^{37}\text{Ar}/^{39}\text{Ar}$ | $^{36}\text{Ar}/^{39}\text{Ar}$<br>(x 10 <sup>-3</sup> ) | $^{39}\text{Ar}_K$<br>(x 10 <sup>-15</sup> mol) | K/Ca            | $^{40}\text{Ar}^*$<br>(%) | Age<br>(Ma) | $\pm 1\sigma$<br>(Ma) |
|--------------------------------------------------------------------------------------------------|---------------------------------|---------------------------------|----------------------------------------------------------|-------------------------------------------------|-----------------|---------------------------|-------------|-----------------------|
| <b>GTM-528-djk</b> , Sanidine, J=0.0007997 $\pm$ 0.06%, D=1.004 $\pm$ 0.001, NM-217C, Lab#=57802 |                                 |                                 |                                                          |                                                 |                 |                           |             |                       |
| 04                                                                                               | 22.30                           | 0.0054                          | 23.24                                                    | 4.149                                           | 94.1            | 69.2                      | 22.13       | 0.14                  |
| 10                                                                                               | 18.13                           | 0.0065                          | 8.732                                                    | 8.180                                           | 78.6            | 85.8                      | 22.294      | 0.074                 |
| 09                                                                                               | 16.73                           | 0.0047                          | 3.990                                                    | 1.257                                           | 108.9           | 93.0                      | 22.30       | 0.26                  |
| 07                                                                                               | 26.84                           | 0.0071                          | 38.17                                                    | 7.027                                           | 72.3            | 58.0                      | 22.32       | 0.14                  |
| 03                                                                                               | 18.23                           | 0.0070                          | 8.870                                                    | 11.054                                          | 72.7            | 85.6                      | 22.376      | 0.062                 |
| 08                                                                                               | 16.35                           | 0.0072                          | 2.514                                                    | 1.377                                           | 70.9            | 95.5                      | 22.38       | 0.23                  |
| 02                                                                                               | 16.96                           | 0.0067                          | 4.440                                                    | 5.571                                           | 76.4            | 92.3                      | 22.434      | 0.077                 |
| 06                                                                                               | 18.80                           | 0.0087                          | 10.61                                                    | 8.695                                           | 58.6            | 83.3                      | 22.461      | 0.074                 |
| 12                                                                                               | 19.68                           | 0.0063                          | 13.59                                                    | 10.708                                          | 80.6            | 79.6                      | 22.465      | 0.073                 |
| 14                                                                                               | 18.21                           | 0.0090                          | 8.452                                                    | 4.368                                           | 56.8            | 86.3                      | 22.528      | 0.098                 |
| 05                                                                                               | 27.91                           | 0.0074                          | 41.09                                                    | 10.062                                          | 68.8            | 56.5                      | 22.61       | 0.13                  |
| 15                                                                                               | 19.32                           | 0.0081                          | 12.02                                                    | 2.184                                           | 63.2            | 81.6                      | 22.61       | 0.19                  |
| 01                                                                                               | 16.42                           | 0.0070                          | 2.174                                                    | 7.177                                           | 72.8            | 96.1                      | 22.624      | 0.067                 |
| 13                                                                                               | 18.13                           | 0.0108                          | 7.953                                                    | 4.119                                           | 47.2            | 87.0                      | 22.63       | 0.11                  |
| 11                                                                                               | 19.36                           | 0.0162                          | 12.01                                                    | 8.288                                           | 31.5            | 81.7                      | 22.676      | 0.075                 |
| <b>Mean age <math>\pm 2\sigma</math></b>                                                         | n=14                            | MSWD=2.05                       |                                                          |                                                 | 68.5 $\pm$ 35.5 |                           | 22.484      | 0.073                 |

**OC-188a**, Sanidine, J=0.0007925 $\pm$ 0.05%, D=1.004 $\pm$ 0.001, NM-208J, Lab#=57174

|    |       |         |         |       |      |        |       |       |
|----|-------|---------|---------|-------|------|--------|-------|-------|
| 03 | 12.17 | -0.4941 | 84.97   | 0.001 | -    | -106.8 | -18.7 | 146.1 |
| 07 | 21.17 | 1.921   | 54.07   | 0.013 | 0.27 | 25.3   | 7.6   | 12.1  |
| 09 | 15.55 | 2.519   | 13.75   | 0.057 | 0.20 | 75.2   | 16.7  | 2.6   |
| 06 | 18.20 | 2.956   | 14.01   | 0.047 | 0.17 | 78.6   | 20.4  | 3.3   |
| 12 | 30.13 | 3.136   | 53.26   | 0.058 | 0.16 | 48.6   | 20.9  | 3.3   |
| 04 | 17.28 | 2.585   | 8.128   | 0.149 | 0.20 | 87.3   | 21.5  | 1.2   |
| 16 | 24.10 | 3.548   | 26.89   | 0.053 | 0.14 | 68.2   | 23.4  | 3.6   |
| 05 | 16.87 | 0.0069  | 1.292   | 1.372 | 73.4 | 97.7   | 23.43 | 0.14  |
| 01 | 20.68 | 2.465   | 12.84   | 0.289 | 0.21 | 82.6   | 24.31 | 0.63  |
| 14 | 20.18 | 0.0082  | 6.752   | 1.367 | 62.6 | 90.1   | 25.81 | 0.17  |
| 17 | 18.88 | 0.0126  | 1.781   | 1.087 | 40.4 | 97.2   | 26.06 | 0.18  |
| 10 | 24.74 | 2.617   | 13.41   | 0.058 | 0.19 | 84.9   | 29.8  | 3.8   |
| 08 | 22.04 | 2.155   | 3.010   | 0.071 | 0.24 | 96.8   | 30.3  | 2.3   |
| 15 | 25.37 | 4.184   | 14.44   | 0.039 | 0.12 | 84.5   | 30.5  | 5.0   |
| 13 | 20.19 | 2.301   | -5.6090 | 0.084 | 0.22 | 109.2  | 31.3  | 2.9   |
| 11 | 40.33 | 0.0140  | 39.99   | 0.010 | 36.3 | 70.7   | 40.3  | 14.5  |

#### Notes:

Isotopic ratios corrected for blank, radioactive decay, and mass discrimination, not corrected for interfering reactions.

Errors quoted for individual analyses include analytical error only, without interfering reaction or J uncertainties.

Mean age is weighted mean age of Taylor (1982). Mean age error is weighted error

of the mean (Taylor, 1982), multiplied by the root of the MSWD where MSWD>1, and also incorporates uncertainty in J factors and irradiation correction uncertainties.

Decay constants and isotopic abundances after Steiger and Jäger (1977).

# symbol preceding sample ID denotes analyses excluded from mean age calculations.

Ages calculated relative to FC-2 Fish Canyon Tuff sanidine interlaboratory standard at 28.02 Ma

Decay Constant (LambdaK (total)) = 5.543e-10/a

Correction factors:

$$(^{39}\text{Ar}/^{37}\text{Ar})_{\text{Ca}} = 0.00068 \pm 5\text{e-}05$$

$$(^{36}\text{Ar}/^{37}\text{Ar})_{\text{Ca}} = 0.00028 \pm 2\text{e-}05$$

$$(^{38}\text{Ar}/^{39}\text{Ar})_K = 0.0125$$

$$(^{40}\text{Ar}/^{39}\text{Ar})_K = 0 \pm 0.0004$$

**Table 4.  $^{40}\text{Ar}/^{39}\text{Ar}$  analytical data.**

| ID                                                                                                  | Power/Temp<br>(Watts/°C) | <sup>40</sup> Ar/ <sup>39</sup> Ar | <sup>37</sup> Ar/ <sup>39</sup> Ar | <sup>36</sup> Ar/ <sup>39</sup> Ar<br>(x 10 <sup>-3</sup> ) | <sup>39</sup> Ar <sub>k</sub><br>(x 10 <sup>-15</sup> mol) | K/Ca                                          | <sup>40</sup> Ar*<br>(%) | <sup>39</sup> Ar<br>(%) | Age<br>(Ma) | ±1σ<br>(Ma) |
|-----------------------------------------------------------------------------------------------------|--------------------------|------------------------------------|------------------------------------|-------------------------------------------------------------|------------------------------------------------------------|-----------------------------------------------|--------------------------|-------------------------|-------------|-------------|
| <b>GTM-627</b> , Biotite, 7.07 mg, J=0.0007997±0.06%, D=1.004±0.001, NM-217L, Lab#=57852-01         |                          |                                    |                                    |                                                             |                                                            |                                               |                          |                         |             |             |
| A                                                                                                   | 650                      | 632.2                              | 0.0478                             | 2100.4                                                      | 0.341                                                      | 10.7                                          | 1.8                      | 0.5                     | 16.61       | 5.37        |
| B                                                                                                   | 750                      | 74.61                              | 0.0437                             | 199.3                                                       | 0.484                                                      | 11.7                                          | 21.1                     | 1.1                     | 22.53       | 1.25        |
| C                                                                                                   | 850                      | 42.31                              | 0.0274                             | 88.64                                                       | 1.45                                                       | 18.6                                          | 38.1                     | 3.0                     | 23.11       | 0.46        |
| D                                                                                                   | 920                      | 27.88                              | 0.0142                             | 39.29                                                       | 2.55                                                       | 35.9                                          | 58.4                     | 6.4                     | 23.32       | 0.25        |
| E                                                                                                   | 1000                     | 21.05                              | 0.0102                             | 17.19                                                       | 6.23                                                       | 50.3                                          | 75.9                     | 14.7                    | 22.90       | 0.10        |
| F                                                                                                   | 1075                     | 20.11                              | 0.0108                             | 14.35                                                       | 8.5                                                        | 47.2                                          | 78.9                     | 26.0                    | 22.75       | 0.08        |
| G                                                                                                   | 1110                     | 20.35                              | 0.0080                             | 14.88                                                       | 10.9                                                       | 63.5                                          | 78.4                     | 40.5                    | 22.87       | 0.08        |
| H                                                                                                   | 1180                     | 19.24                              | 0.0301                             | 11.02                                                       | 23.9                                                       | 17.0                                          | 83.1                     | 72.2                    | 22.91       | 0.06        |
| I                                                                                                   | 1210                     | 19.11                              | 0.0410                             | 10.66                                                       | 15.1                                                       | 12.5                                          | 83.5                     | 92.2                    | 22.89       | 0.06        |
| J                                                                                                   | 1250                     | 20.19                              | 0.0169                             | 14.38                                                       | 5.00                                                       | 30.2                                          | 79.0                     | 98.9                    | 22.86       | 0.12        |
| K                                                                                                   | 1300                     | 28.63                              | 0.0175                             | 44.28                                                       | 0.67                                                       | 29.2                                          | 54.3                     | 99.8                    | 22.29       | 0.60        |
| L                                                                                                   | 1680                     | 507.0                              | 0.1638                             | 1675.3                                                      | 0.186                                                      | 3.1                                           | 2.4                      | 100.0                   | 17.16       | 5.78        |
| <b>Integrated age ± 2σ</b>                                                                          |                          |                                    | n=12                               |                                                             | 75.3                                                       | 21.1                                          | K2O=5.12                 |                         | 22.84       | 0.16        |
| <b>Plateau ± 2σ</b>                                                                                 |                          | steps A-L                          | n=12                               | MSWD=0.87                                                   | 75.3                                                       | 30.5 ±37.3                                    |                          | 100.0                   | 22.88       | 0.07        |
| <b>Isochron±2σ</b>                                                                                  |                          | steps A-L                          | n=12                               | MSWD=0.81                                                   |                                                            | <sup>40</sup> Ar/ <sup>36</sup> Ar= 294.1±2.6 |                          |                         | 22.90       | 0.08        |
| <b>WRC-82</b> , Biotite, 8.76 mg, J=0.000798±0.06%, D=1.004±0.001, NM-217L, Lab#=57849-01           |                          |                                    |                                    |                                                             |                                                            |                                               |                          |                         |             |             |
| X A                                                                                                 | 650                      | 727.1                              | 0.3915                             | 2411.7                                                      | 0.427                                                      | 1.3                                           | 2.0                      | 0.5                     | 20.78       | 5.32        |
| X B                                                                                                 | 750                      | 92.57                              | 0.2107                             | 248.6                                                       | 0.627                                                      | 2.4                                           | 20.6                     | 1.3                     | 27.32       | 1.13        |
| X C                                                                                                 | 850                      | 45.75                              | 0.1063                             | 81.97                                                       | 1.99                                                       | 4.8                                           | 47.1                     | 3.7                     | 30.74       | 0.42        |
| X D                                                                                                 | 920                      | 27.75                              | 0.0444                             | 22.02                                                       | 3.67                                                       | 11.5                                          | 76.6                     | 8.1                     | 30.34       | 0.16        |
| X E                                                                                                 | 1000                     | 24.48                              | 0.0248                             | 11.05                                                       | 8.2                                                        | 20.5                                          | 86.7                     | 18.0                    | 30.30       | 0.09        |
| X F                                                                                                 | 1075                     | 23.30                              | 0.0253                             | 7.162                                                       | 8.1                                                        | 20.2                                          | 90.9                     | 27.8                    | 30.25       | 0.07        |
| X G                                                                                                 | 1110                     | 23.75                              | 0.0404                             | 8.843                                                       | 5.25                                                       | 12.6                                          | 89.0                     | 34.1                    | 30.19       | 0.10        |
| H                                                                                                   | 1180                     | 24.46                              | 0.1647                             | 11.80                                                       | 13.5                                                       | 3.1                                           | 85.8                     | 50.3                    | 29.96       | 0.08        |
| I                                                                                                   | 1210                     | 23.15                              | 0.0316                             | 7.467                                                       | 18.3                                                       | 16.1                                          | 90.5                     | 72.4                    | 29.91       | 0.07        |
| J                                                                                                   | 1250                     | 22.63                              | 0.0046                             | 5.353                                                       | 21.0                                                       | 111.1                                         | 93.0                     | 97.7                    | 30.06       | 0.06        |
| K                                                                                                   | 1300                     | 25.80                              | 0.0047                             | 16.69                                                       | 1.51                                                       | 108.5                                         | 80.9                     | 99.5                    | 29.80       | 0.24        |
| L                                                                                                   | 1680                     | 274.4                              | 0.2547                             | 850.8                                                       | 0.395                                                      | 2.0                                           | 8.4                      | 100.0                   | 32.83       | 2.59        |
| <b>Integrated age ± 2σ</b>                                                                          |                          |                                    | n=12                               |                                                             | 82.9                                                       | 9.8                                           | K2O=4.56                 |                         | 30.03       | 0.17        |
| <b>Plateau ± 2σ</b>                                                                                 |                          | steps H-L                          | n=5                                | MSWD=1.11                                                   | 54.7                                                       | 1.8 ±113.1                                    |                          | 65.9                    | 29.98       | 0.09        |
| <b>Isochron±2σ</b>                                                                                  |                          | steps A-L                          | n=12                               | MSWD=3.53                                                   |                                                            | <sup>40</sup> Ar/ <sup>36</sup> Ar=294.6±4.3  |                          |                         | 30.10       | 0.15        |
| <b>WRC-37-111006-djk</b> , Biotite, 4.2 mg, J=0.000798±0.06%, D=1.004±0.001, NM-217L, Lab#=57851-14 |                          |                                    |                                    |                                                             |                                                            |                                               |                          |                         |             |             |
| A                                                                                                   | 650                      | 528.9                              | 0.0527                             | 1750.4                                                      | 4.53                                                       | 9.7                                           | 2.2                      | 13.9                    | 16.72       | 3.13        |
| B                                                                                                   | 750                      | 71.02                              | 0.0461                             | 216.8                                                       | 5.76                                                       | 11.1                                          | 9.8                      | 31.7                    | 9.97        | 0.45        |
| C                                                                                                   | 850                      | 51.68                              | 0.0470                             | 146.9                                                       | 3.19                                                       | 10.9                                          | 16.0                     | 41.5                    | 11.87       | 0.46        |
| D                                                                                                   | 920                      | 55.02                              | 0.0525                             | 163.1                                                       | 2.21                                                       | 9.7                                           | 12.4                     | 48.3                    | 9.82        | 0.52        |
| E                                                                                                   | 1000                     | 64.12                              | 0.0593                             | 187.9                                                       | 5.92                                                       | 8.6                                           | 13.4                     | 66.5                    | 12.35       | 0.43        |
| F                                                                                                   | 1075                     | 35.28                              | 0.0590                             | 90.57                                                       | 6.7                                                        | 8.6                                           | 24.2                     | 87.1                    | 12.24       | 0.26        |
| G                                                                                                   | 1110                     | 29.73                              | 0.0774                             | 73.42                                                       | 2.53                                                       | 6.6                                           | 27.0                     | 94.9                    | 11.54       | 0.32        |
| H                                                                                                   | 1180                     | 30.32                              | 0.4098                             | 73.47                                                       | 1.20                                                       | 1.2                                           | 28.5                     | 98.6                    | 12.41       | 0.40        |
| I                                                                                                   | 1210                     | 33.08                              | 1.415                              | 80.29                                                       | 0.354                                                      | 0.36                                          | 28.6                     | 99.7                    | 13.60       | 1.14        |
| J                                                                                                   | 1250                     | 44.07                              | 0.6706                             | 127.8                                                       | 0.113                                                      | 0.76                                          | 14.4                     | 100.0                   | 9.14        | 2.64        |
| <b>Integrated age ± 2σ</b>                                                                          |                          |                                    | n=10                               |                                                             | 32.5                                                       | 6.0                                           | K2O=3.72                 |                         | 12.24       | 1.32        |
| <b>Plateau ± 2σ</b>                                                                                 |                          | steps A-J                          | n=10                               | MSWD=4.87                                                   | 32.5                                                       | 8.9 ±8.6                                      |                          | 100.0                   | 11.72       | 0.62        |
| <b>Isochron±2σ</b>                                                                                  |                          | steps A-J                          | n=10                               | MSWD=5.35                                                   |                                                            | <sup>40</sup> Ar/ <sup>36</sup> Ar=294.9±2.2  |                          |                         | 11.83       | 1.11        |

| ID                                                                                                              | Power/Temp<br>(Watts/°C) | <sup>40</sup> Ar/ <sup>39</sup> Ar | <sup>37</sup> Ar/ <sup>39</sup> Ar | <sup>36</sup> Ar/ <sup>39</sup> Ar<br>(x 10 <sup>-3</sup> ) | <sup>39</sup> Ar <sub>K</sub><br>(x 10 <sup>-15</sup> mol) | K/Ca                                          | <sup>40</sup> Ar*<br>(%) | <sup>39</sup> Ar<br>(%) | Age<br>(Ma) | ±1σ<br>(Ma) |
|-----------------------------------------------------------------------------------------------------------------|--------------------------|------------------------------------|------------------------------------|-------------------------------------------------------------|------------------------------------------------------------|-----------------------------------------------|--------------------------|-------------------------|-------------|-------------|
| GTM-625-djk, wr, 40.96 mg, J=0.0007669±0.10%, D=1.004±0.001, NM-217D, Lab#=57808-01                             |                          |                                    |                                    |                                                             |                                                            |                                               |                          |                         |             |             |
| Xi B                                                                                                            | 625                      | 362.0                              | 3.967                              | 1184.0                                                      | 0.80                                                       | 0.13                                          | 3.4                      | 1.9                     | 17.23       | 2.92        |
| C                                                                                                               | 700                      | 81.98                              | 3.681                              | 213.5                                                       | 1.77                                                       | 0.14                                          | 23.4                     | 6.3                     | 26.44       | 0.66        |
| E                                                                                                               | 750                      | 48.11                              | 5.058                              | 102.6                                                       | 1.72                                                       | 0.10                                          | 37.9                     | 10.5                    | 25.12       | 0.45        |
| F                                                                                                               | 800                      | 42.02                              | 3.996                              | 81.33                                                       | 3.63                                                       | 0.13                                          | 43.6                     | 19.3                    | 25.23       | 0.27        |
| G                                                                                                               | 875                      | 45.09                              | 3.138                              | 91.96                                                       | 4.90                                                       | 0.16                                          | 40.3                     | 31.2                    | 25.03       | 0.31        |
| H                                                                                                               | 975                      | 41.25                              | 2.442                              | 78.76                                                       | 7.8                                                        | 0.21                                          | 44.1                     | 50.2                    | 25.02       | 0.21        |
| I                                                                                                               | 1075                     | 44.11                              | 1.250                              | 89.76                                                       | 10.3                                                       | 0.41                                          | 40.1                     | 75.4                    | 24.33       | 0.24        |
| J                                                                                                               | 1250                     | 51.96                              | 7.235                              | 118.2                                                       | 4.46                                                       | 0.071                                         | 34.0                     | 86.2                    | 24.37       | 0.36        |
| K                                                                                                               | 1700                     | 81.55                              | 10.99                              | 217.1                                                       | 5.67                                                       | 0.046                                         | 22.5                     | 100.0                   | 25.35       | 0.52        |
| Integrated age ± 2σ                                                                                             |                          |                                    | n=9                                |                                                             | 41.1                                                       | 0.12                                          | K2O=0.50                 |                         | 24.75       | 0.53        |
| Plateau ± 2σ                                                                                                    |                          | steps C-K                          | n=8                                | MSWD=2.31                                                   | 40.3                                                       | 0.20 ±0.23                                    |                          | 98.1                    | 24.92       | 0.34        |
| Isochron±2σ                                                                                                     |                          | steps C-K                          | n=8                                | MSWD=2.22                                                   |                                                            | <sup>40</sup> Ar/ <sup>36</sup> Ar=299.2±7.0  |                          |                         | 24.4        | 1.00        |
| OC-740-130505-djk, Groundmass Concentrate, 33.29 mg, J=0.0008033±0.09%, D=1.0068±0.0015, NM-208D, Lab#=57143-01 |                          |                                    |                                    |                                                             |                                                            |                                               |                          |                         |             |             |
| A                                                                                                               | 3                        | 4636.9                             | 3.919                              | 15661.5                                                     | 0.223                                                      | 0.13                                          | 0.2                      | 0.3                     | 13.46       | 41.49       |
| B                                                                                                               | 3                        | 2467.2                             | 3.494                              | 8289.9                                                      | 0.448                                                      | 0.15                                          | 0.7                      | 0.8                     | 25.66       | 22.20       |
| C                                                                                                               | 4                        | 1214.9                             | 5.707                              | 4083.7                                                      | 0.875                                                      | 0.089                                         | 0.7                      | 1.9                     | 12.52       | 10.85       |
| D                                                                                                               | 4                        | 746.8                              | 4.382                              | 2502.2                                                      | 1.539                                                      | 0.12                                          | 1.0                      | 3.7                     | 11.25       | 6.72        |
| E                                                                                                               | 5                        | 464.9                              | 3.193                              | 1545.1                                                      | 2.440                                                      | 0.16                                          | 1.8                      | 6.7                     | 12.38       | 4.07        |
| F                                                                                                               | 6                        | 441.3                              | 3.453                              | 1466.0                                                      | 7.53                                                       | 0.15                                          | 1.9                      | 15.7                    | 12.13       | 3.78        |
| G                                                                                                               | 8                        | 130.8                              | 3.147                              | 415.8                                                       | 31.97                                                      | 0.16                                          | 6.3                      | 54.3                    | 11.92       | 1.10        |
| H                                                                                                               | 10                       | 37.32                              | 2.210                              | 102.6                                                       | 23.76                                                      | 0.23                                          | 19.3                     | 83.0                    | 10.42       | 0.29        |
| I                                                                                                               | 25                       | 46.61                              | 14.40                              | 137.2                                                       | 14.10                                                      | 0.035                                         | 15.6                     | 100.0                   | 10.58       | 0.39        |
| Integrated age ± 2σ                                                                                             |                          |                                    | n=9                                |                                                             | 82.9                                                       | 0.10                                          | K2O=1.19                 |                         | 11.37       | 2.93        |
| Plateau ± 2σ                                                                                                    |                          | steps A-I                          | n=9                                | MSWD=0.33                                                   | 82.9                                                       | 0.16 ±0.11                                    |                          | 100.0                   | 10.55       | 0.45        |
| Isochron±2σ                                                                                                     |                          | steps A-I                          | n=9                                | MSWD=0.19                                                   |                                                            | <sup>40</sup> Ar/ <sup>36</sup> Ar= 296.4±1.5 |                          |                         | 10.38       | 0.55        |
| GTM-260805-djk, Groundmass Concentrate, 19.41 mg, J=0.0007819±0.09%, D=1.0068±0.0015, NM-208K, Lab#=57183-01    |                          |                                    |                                    |                                                             |                                                            |                                               |                          |                         |             |             |
| Xi A                                                                                                            | 3                        | 8.694                              | 0.5563                             | 23.00                                                       | 2.348                                                      | 0.92                                          | 22.4                     | 2.0                     | 2.74        | 0.23        |
| Xi B                                                                                                            | 3                        | 10.63                              | 0.5990                             | 27.17                                                       | 3.738                                                      | 0.85                                          | 24.9                     | 5.2                     | 3.73        | 0.16        |
| C                                                                                                               | 4                        | 5.501                              | 0.7002                             | 7.685                                                       | 4.58                                                       | 0.73                                          | 59.8                     | 9.1                     | 4.63        | 0.10        |
| D                                                                                                               | 4                        | 15.57                              | 0.7518                             | 43.37                                                       | 5.19                                                       | 0.68                                          | 18.1                     | 13.5                    | 3.98        | 0.19        |
| E                                                                                                               | 5                        | 5.226                              | 0.7982                             | 7.053                                                       | 5.26                                                       | 0.64                                          | 61.4                     | 18.0                    | 4.52        | 0.09        |
| F                                                                                                               | 6                        | 5.292                              | 0.9196                             | 7.446                                                       | 16.94                                                      | 0.55                                          | 59.9                     | 32.5                    | 4.47        | 0.04        |
| G                                                                                                               | 8                        | 9.882                              | 0.9434                             | 23.13                                                       | 22.04                                                      | 0.54                                          | 31.6                     | 51.3                    | 4.41        | 0.08        |
| H                                                                                                               | 10                       | 18.20                              | 0.9869                             | 50.82                                                       | 19.61                                                      | 0.52                                          | 17.9                     | 68.0                    | 4.60        | 0.15        |
| I                                                                                                               | 25                       | 5.225                              | 1.226                              | 6.666                                                       | 37.42                                                      | 0.42                                          | 64.2                     | 100.0                   | 4.73        | 0.04        |
| Integrated age ± 2σ                                                                                             |                          |                                    | n=9                                |                                                             | 117.1                                                      | 0.51                                          | K2O=2.96                 |                         | 4.49        | 0.12        |
| Plateau ± 2σ                                                                                                    |                          | steps C-I                          | n=7                                | MSWD=6.67                                                   | 111.0                                                      | 0.52 ±0.21                                    |                          | 94.8                    | 4.59        | 0.12        |
| Isochron±2σ                                                                                                     |                          | steps C-I                          | n=7                                | MSWD=6.58                                                   |                                                            | <sup>40</sup> Ar/ <sup>36</sup> Ar=290.4±9.5  |                          |                         | 4.67        | 0.18        |

| ID                                                                                                      | Power/Temp<br>(Watts/°C) | <sup>40</sup> Ar/ <sup>39</sup> Ar | <sup>37</sup> Ar/ <sup>39</sup> Ar | <sup>36</sup> Ar/ <sup>39</sup> Ar<br>(x 10 <sup>-3</sup> ) | <sup>39</sup> Ar <sub>K</sub><br>(x 10 <sup>-15</sup> mol) | K/Ca                                          | <sup>40</sup> Ar*<br>(%) | <sup>39</sup> Ar<br>(%) | Age<br>(Ma) | ±1σ<br>(Ma) |
|---------------------------------------------------------------------------------------------------------|--------------------------|------------------------------------|------------------------------------|-------------------------------------------------------------|------------------------------------------------------------|-----------------------------------------------|--------------------------|-------------------------|-------------|-------------|
| TJ basalt, Groundmass Concentrate, 32.49 mg, J=0.0008005±0.06%, D=1.0068±0.0015, NM-208D, Lab#=57142-01 |                          |                                    |                                    |                                                             |                                                            |                                               |                          |                         |             |             |
| X A                                                                                                     | 3                        | 62.49                              | 1.235                              | 206.9                                                       | 8.81                                                       | 0.41                                          | 2.3                      | 9.3                     | 2.08        | 0.57        |
| X B                                                                                                     | 3                        | 30.79                              | 1.673                              | 96.28                                                       | 14.78                                                      | 0.30                                          | 8.0                      | 25.0                    | 3.58        | 0.28        |
| C                                                                                                       | 4                        | 20.99                              | 2.133                              | 60.93                                                       | 15.09                                                      | 0.24                                          | 15.1                     | 41.0                    | 4.57        | 0.20        |
| D                                                                                                       | 4                        | 11.95                              | 2.942                              | 30.52                                                       | 21.70                                                      | 0.17                                          | 26.5                     | 64.0                    | 4.58        | 0.11        |
| E                                                                                                       | 5                        | 9.511                              | 3.598                              | 21.87                                                       | 9.68                                                       | 0.14                                          | 35.2                     | 74.3                    | 4.84        | 0.11        |
| F                                                                                                       | 6                        | 7.919                              | 4.104                              | 16.63                                                       | 13.09                                                      | 0.12                                          | 42.2                     | 88.1                    | 4.84        | 0.08        |
| G                                                                                                       | 8                        | 10.70                              | 7.049                              | 26.88                                                       | 5.33                                                       | 0.072                                         | 31.2                     | 93.8                    | 4.84        | 0.16        |
| H                                                                                                       | 10                       | 15.36                              | 10.22                              | 41.38                                                       | 2.241                                                      | 0.050                                         | 25.9                     | 96.1                    | 5.78        | 0.33        |
| I                                                                                                       | 25                       | 35.96                              | 32.82                              | 119.1                                                       | 3.634                                                      | 0.016                                         | 9.7                      | 100.0                   | 5.14        | 0.43        |
| Integrated age ± 2σ                                                                                     |                          |                                    | n=9                                |                                                             | 94.4                                                       | 0.12                                          | K2O=1.39                 |                         | 4.32        | 0.34        |
| Plateau ± 2σ                                                                                            |                          | steps C-I                          | n=7                                | MSWD=2.56                                                   | 70.8                                                       | 0.15 ±0.15                                    |                          | 75.0                    | 4.79        | 0.15        |
| Isochron±2σ                                                                                             |                          | steps A-I                          | n=9                                | MSWD=4.43                                                   |                                                            | <sup>40</sup> Ar/ <sup>36</sup> Ar=288.7±5.5  |                          |                         | 5.02        | 0.29        |
| J54B, Groundmass Concentrate, 36.68 mg, J=0.0023±0.43%, D=1.0032±0.0012, NM-212F, Lab#=57452-01         |                          |                                    |                                    |                                                             |                                                            |                                               |                          |                         |             |             |
| A                                                                                                       | 550                      | 38.07                              | 0.3158                             | 125.0                                                       | 18.9                                                       | 1.6                                           | 3.1                      | 12.8                    | 4.82        | 0.84        |
| B                                                                                                       | 625                      | 7.116                              | 0.6634                             | 20.72                                                       | 20.4                                                       | 0.77                                          | 14.6                     | 26.7                    | 4.31        | 0.20        |
| C                                                                                                       | 700                      | 5.523                              | 1.565                              | 15.38                                                       | 21.9                                                       | 0.33                                          | 19.9                     | 41.6                    | 4.56        | 0.15        |
| D                                                                                                       | 750                      | 4.142                              | 2.755                              | 10.56                                                       | 13.7                                                       | 0.19                                          | 30.0                     | 50.9                    | 5.15        | 0.20        |
| E                                                                                                       | 800                      | 2.660                              | 4.157                              | 6.182                                                       | 15.3                                                       | 0.12                                          | 44.1                     | 61.3                    | 4.85        | 0.17        |
| F                                                                                                       | 875                      | 1.817                              | 4.812                              | 3.737                                                       | 17.9                                                       | 0.11                                          | 60.9                     | 73.4                    | 4.58        | 0.17        |
| G                                                                                                       | 975                      | 1.709                              | 5.509                              | 3.401                                                       | 17.8                                                       | 0.093                                         | 67.7                     | 85.6                    | 4.78        | 0.17        |
| H                                                                                                       | 1075                     | 2.415                              | 6.407                              | 6.424                                                       | 8.9                                                        | 0.080                                         | 43.1                     | 91.6                    | 4.32        | 0.23        |
| I                                                                                                       | 1250                     | 5.302                              | 16.57                              | 18.23                                                       | 6.72                                                       | 0.031                                         | 24.1                     | 96.2                    | 5.35        | 0.57        |
| Xi J                                                                                                    | 1700                     | 12.27                              | 59.58                              | 52.93                                                       | 5.62                                                       | 0.009                                         | 12.6                     | 100.0                   | 6.7         | 1.7         |
| Integrated age ± 2σ                                                                                     |                          |                                    | n=10                               |                                                             | 147.3                                                      | 0.088                                         | K2O=0.67%                |                         | 4.78        | 0.45        |
| Plateau ± 2σ                                                                                            |                          | steps A-I                          | n=9                                | MSWD=1.89                                                   | 141.6                                                      | 0.44 ±1.04                                    |                          | 96.2                    | 4.67        | 0.19        |
| Isochron±2σ                                                                                             |                          | steps A-I                          | n=9                                | MSWD=3.01                                                   |                                                            | <sup>40</sup> Ar/ <sup>36</sup> Ar= 295.0±4.7 |                          |                         | 4.70        | 0.24        |
| ER-76, wr, 42.82 mg, J=0.0007825±0.08%, D=1.0014±0.001, NM-217F, Lab#=57814-01                          |                          |                                    |                                    |                                                             |                                                            |                                               |                          |                         |             |             |
| Xi B                                                                                                    | 625                      | 1236.6                             | 1.121                              | 4087.1                                                      | 2.24                                                       | 0.46                                          | 2.3                      | 7.3                     | 40.48       | 7.35        |
| C                                                                                                       | 700                      | 376.9                              | -0.1576                            | 1216.6                                                      | 2.19                                                       | -                                             | 4.6                      | 14.5                    | 24.33       | 2.59        |
| D                                                                                                       | 750                      | 368.5                              | 0.6771                             | 1189.1                                                      | 1.44                                                       | 0.75                                          | 4.7                      | 19.3                    | 24.11       | 2.68        |
| E                                                                                                       | 800                      | 995.4                              | 0.8257                             | 3301.9                                                      | 1.75                                                       | 0.62                                          | 2.0                      | 25.0                    | 27.69       | 5.97        |
| F                                                                                                       | 875                      | 795.6                              | 0.7307                             | 2620.2                                                      | 2.83                                                       | 0.70                                          | 2.7                      | 34.3                    | 29.98       | 4.78        |
| G                                                                                                       | 975                      | 344.2                              | 0.7200                             | 1115.1                                                      | 5.80                                                       | 0.71                                          | 4.3                      | 53.3                    | 20.71       | 2.04        |
| H                                                                                                       | 1075                     | 229.4                              | 2.116                              | 725.7                                                       | 3.22                                                       | 0.24                                          | 6.6                      | 63.9                    | 21.25       | 1.48        |
| I                                                                                                       | 1250                     | 97.84                              | 19.48                              | 286.2                                                       | 10.0                                                       | 0.026                                         | 15.2                     | 96.8                    | 21.19       | 0.59        |
| Xi J                                                                                                    | 1700                     | 320.2                              | 72.56                              | 1032.9                                                      | 0.99                                                       | 0.007                                         | 6.6                      | 100.0                   | 30.91       | 2.96        |
| Integrated age ± 2σ                                                                                     |                          |                                    | n=9                                |                                                             | 30.5                                                       | 0.054                                         | K2O=0.35                 |                         | 24.4        | 4.4         |
| Plateau ± 2σ                                                                                            |                          | steps C-I                          | n=7                                | MSWD=1.14                                                   | 27.3                                                       | 0.37 ±0.56                                    |                          | 89.4                    | 21.5        | 1.1         |
| Isochron±2σ                                                                                             |                          | steps C-I                          | n=7                                | MSWD=0.48                                                   |                                                            | <sup>40</sup> Ar/ <sup>36</sup> Ar= 297.2±1.6 |                          |                         | 20.4        | 1.5         |

| ID                                                                                 | Power/Temp<br>(Watts/°C) | <sup>40</sup> Ar/ <sup>39</sup> Ar | <sup>37</sup> Ar/ <sup>39</sup> Ar | <sup>36</sup> Ar/ <sup>39</sup> Ar<br>(x 10 <sup>-3</sup> ) | <sup>39</sup> Ar <sub>K</sub><br>(x 10 <sup>-15</sup> mol) | K/Ca                                         | <sup>40</sup> Ar*<br>(%) | <sup>39</sup> Ar<br>(%) | Age<br>(Ma) | ±1σ<br>(Ma) |
|------------------------------------------------------------------------------------|--------------------------|------------------------------------|------------------------------------|-------------------------------------------------------------|------------------------------------------------------------|----------------------------------------------|--------------------------|-------------------------|-------------|-------------|
| GS0602, wr, 25.94 mg, J=0.0007696±0.07%, D=1.004±0.001, NM-217D, Lab#=57805-01     |                          |                                    |                                    |                                                             |                                                            |                                              |                          |                         |             |             |
| Xi A                                                                               | 550                      | 6698.1                             | 1.560                              | 22262.7                                                     | 0.85                                                       | 0.33                                         | 1.8                      | 4.2                     | 158.95      | 36.89       |
| B                                                                                  | 625                      | 283.0                              | 1.284                              | 921.3                                                       | 2.08                                                       | 0.40                                         | 3.8                      | 14.4                    | 15.03       | 1.91        |
| C                                                                                  | 700                      | 149.2                              | 1.460                              | 469.8                                                       | 1.64                                                       | 0.35                                         | 7.0                      | 22.5                    | 14.48       | 1.22        |
| D                                                                                  | 750                      | 96.89                              | 1.368                              | 289.4                                                       | 2.21                                                       | 0.37                                         | 11.9                     | 33.4                    | 15.91       | 0.78        |
| E                                                                                  | 800                      | 111.6                              | 1.167                              | 336.8                                                       | 1.85                                                       | 0.44                                         | 10.9                     | 42.5                    | 16.86       | 0.92        |
| F                                                                                  | 875                      | 128.8                              | 1.166                              | 387.2                                                       | 2.25                                                       | 0.44                                         | 11.3                     | 53.6                    | 20.05       | 0.95        |
| G                                                                                  | 975                      | 159.6                              | 1.383                              | 486.4                                                       | 2.32                                                       | 0.37                                         | 10.0                     | 65.0                    | 22.09       | 1.13        |
| H                                                                                  | 1075                     | 54.93                              | 2.256                              | 141.5                                                       | 1.60                                                       | 0.23                                         | 24.2                     | 72.9                    | 18.39       | 0.61        |
| I                                                                                  | 1250                     | 52.14                              | 16.81                              | 139.8                                                       | 4.70                                                       | 0.030                                        | 23.5                     | 96.0                    | 17.09       | 0.40        |
| Xi J                                                                               | 1700                     | 242.9                              | 28.87                              | 703.2                                                       | 0.82                                                       | 0.018                                        | 15.4                     | 100.0                   | 52.32       | 2.00        |
| Integrated age ± 2σ                                                                |                          |                                    | n=10                               |                                                             | 20.3                                                       | 0.083                                        | K2O=0.39                 |                         | 25.1        | 4.5         |
| Plateau ± 2σ                                                                       |                          | steps B-I                          | n=8                                | MSWD=5.62                                                   | 18.641                                                     | 0.288±0.275                                  |                          | 91.8                    | 17.5        | 1.2         |
| Isochron±2σ                                                                        |                          | steps B-I                          | n=8                                | MSWD=6.39                                                   |                                                            | <sup>40</sup> Ar/ <sup>36</sup> Ar=298.2±4.5 |                          |                         | 17.3        | 1.90        |
| ER-43-djk, wr, 38.17 mg, J=0.0007841±0.07%, D=1.0014±0.001, NM-217F, Lab#=57815-01 |                          |                                    |                                    |                                                             |                                                            |                                              |                          |                         |             |             |
| B                                                                                  | 625                      | 440.0                              | 0.9587                             | 1442.0                                                      | 2.74                                                       | 0.53                                         | 3.2                      | 8.0                     | 19.69       | 2.83        |
| C                                                                                  | 700                      | 122.9                              | 1.276                              | 380.0                                                       | 3.67                                                       | 0.40                                         | 8.7                      | 18.7                    | 15.07       | 0.84        |
| D                                                                                  | 750                      | 65.44                              | 1.626                              | 190.8                                                       | 3.57                                                       | 0.31                                         | 14.1                     | 29.2                    | 12.99       | 0.50        |
| E                                                                                  | 800                      | 52.25                              | 1.668                              | 141.6                                                       | 3.48                                                       | 0.31                                         | 20.2                     | 39.4                    | 14.86       | 0.39        |
| F                                                                                  | 875                      | 69.11                              | 1.402                              | 199.5                                                       | 4.45                                                       | 0.36                                         | 14.9                     | 52.4                    | 14.50       | 0.54        |
| G                                                                                  | 975                      | 81.02                              | 1.550                              | 235.4                                                       | 4.09                                                       | 0.33                                         | 14.3                     | 64.3                    | 16.34       | 0.67        |
| H                                                                                  | 1075                     | 62.94                              | 3.640                              | 175.2                                                       | 1.94                                                       | 0.14                                         | 18.2                     | 70.0                    | 16.20       | 0.55        |
| I                                                                                  | 1250                     | 79.37                              | 22.06                              | 235.3                                                       | 8.7                                                        | 0.023                                        | 14.7                     | 95.6                    | 16.67       | 0.56        |
| J                                                                                  | 1700                     | 160.7                              | 21.90                              | 508.2                                                       | 1.51                                                       | 0.023                                        | 7.7                      | 100.0                   | 17.59       | 1.50        |
| Integrated age ± 2σ                                                                |                          |                                    | n=9                                |                                                             | 34.2                                                       | 0.065                                        | K2O=0.44                 |                         | 15.86       | 1.22        |
| Plateau ± 2σ                                                                       |                          | steps B-J                          | n=9                                | MSWD=5.00                                                   | 34.2                                                       | 0.25 ±0.35                                   |                          | 100.0                   | 15.14       | 0.90        |
| Isochron±2σ                                                                        |                          | steps B-J                          | n=9                                | MSWD=4.74                                                   |                                                            | <sup>40</sup> Ar/ <sup>36</sup> Ar=298.9±5.7 |                          |                         | 14.2        | 1.9         |
| 091206-d, wr, 38.34 mg, J=0.0007706±0.07%, D=1.004±0.001, NM-217D, Lab#=57806-01   |                          |                                    |                                    |                                                             |                                                            |                                              |                          |                         |             |             |
| X A                                                                                | 550                      | 47793.3                            | 2.056                              | 158461.1                                                    | 0.154                                                      | 0.25                                         | 2.0                      | 0.6                     | 1006.65     | 177.21      |
| X B                                                                                | 625                      | 1991.5                             | 5.093                              | 6660.5                                                      | 0.434                                                      | 0.10                                         | 1.2                      | 2.4                     | 32.77       | 13.51       |
| X C                                                                                | 700                      | 619.1                              | 3.802                              | 2089.7                                                      | 0.487                                                      | 0.13                                         | 0.3                      | 4.4                     | 2.63        | 5.03        |
| X D                                                                                | 750                      | 1279.0                             | 3.154                              | 4251.6                                                      | 1.67                                                       | 0.16                                         | 1.8                      | 11.1                    | 31.64       | 7.31        |
| X E                                                                                | 800                      | 381.5                              | 2.505                              | 1240.9                                                      | 2.19                                                       | 0.20                                         | 3.9                      | 20.0                    | 20.80       | 2.32        |
| F                                                                                  | 875                      | 148.1                              | 3.227                              | 475.3                                                       | 5.55                                                       | 0.16                                         | 5.3                      | 42.6                    | 10.97       | 0.96        |
| G                                                                                  | 975                      | 43.19                              | 5.272                              | 124.9                                                       | 5.07                                                       | 0.097                                        | 15.6                     | 63.2                    | 9.37        | 0.37        |
| H                                                                                  | 1075                     | 55.71                              | 4.865                              | 167.2                                                       | 4.17                                                       | 0.10                                         | 12.0                     | 80.1                    | 9.32        | 0.44        |
| I                                                                                  | 1250                     | 39.06                              | 7.796                              | 109.3                                                       | 2.10                                                       | 0.065                                        | 19.0                     | 88.7                    | 10.34       | 0.40        |
| Xi J                                                                               | 1700                     | 84.42                              | 24.87                              | 254.2                                                       | 2.79                                                       | 0.021                                        | 13.5                     | 100.0                   | 16.00       | 0.76        |
| Integrated age ± 2σ                                                                |                          |                                    | n=10                               |                                                             | 24.6                                                       | 0.075                                        | K2O=0.32                 |                         | 21.7        | 5.8         |
| Plateau ± 2σ                                                                       |                          | steps F-I                          | n=4                                | MSWD=1.93                                                   | 16.9                                                       | 0.12 ±0.08                                   |                          | 68.6                    | 9.75        | 0.63        |
| Isochron±2σ                                                                        |                          | steps A-I                          | n=9                                | MSWD=3.80                                                   |                                                            | <sup>40</sup> Ar/ <sup>36</sup> Ar=299.4±2.5 |                          |                         | 9.0         | 1.0         |

| ID                                                                                                           | Power/Temp<br>(Watts/°C) | <sup>40</sup> Ar/ <sup>39</sup> Ar | <sup>37</sup> Ar/ <sup>39</sup> Ar | <sup>36</sup> Ar/ <sup>39</sup> Ar<br>(x 10 <sup>-3</sup> ) | <sup>39</sup> Ar <sub>K</sub><br>(x 10 <sup>-15</sup> mol) | K/Ca  | <sup>40</sup> Ar*<br>(%) | <sup>39</sup> Ar<br>(%) | Age<br>(Ma) | ±1σ<br>(Ma) |
|--------------------------------------------------------------------------------------------------------------|--------------------------|------------------------------------|------------------------------------|-------------------------------------------------------------|------------------------------------------------------------|-------|--------------------------|-------------------------|-------------|-------------|
| WRC-68, wr, 39.73 mg, J=0.0007692±0.08%, D=1.004±0.001, NM-217D, Lab#=57807-01                               |                          |                                    |                                    |                                                             |                                                            |       |                          |                         |             |             |
| Xi A                                                                                                         | 550                      | 22736.0                            | 1.782                              | 75626.9                                                     | 0.286                                                      | 0.29  | 1.7                      | 0.7                     | 472.12      | 104.29      |
| Xi B                                                                                                         | 625                      | 199.8                              | 3.121                              | 571.1                                                       | 1.38                                                       | 0.16  | 15.6                     | 3.9                     | 42.94       | 1.49        |
| Xi C                                                                                                         | 700                      | 64.16                              | 2.526                              | 117.0                                                       | 1.90                                                       | 0.20  | 46.4                     | 8.4                     | 40.95       | 0.53        |
| Xi D                                                                                                         | 750                      | 23.52                              | 2.364                              | 15.38                                                       | 5.22                                                       | 0.22  | 81.5                     | 20.7                    | 26.45       | 0.13        |
| Xi E                                                                                                         | 800                      | 14.00                              | 2.579                              | 3.323                                                       | 6.06                                                       | 0.20  | 94.5                     | 35.0                    | 18.30       | 0.08        |
| Xi F                                                                                                         | 875                      | 11.38                              | 2.306                              | 2.531                                                       | 9.5                                                        | 0.22  | 95.1                     | 57.5                    | 14.98       | 0.06        |
| Xi G                                                                                                         | 975                      | 12.00                              | 1.602                              | 3.236                                                       | 9.0                                                        | 0.32  | 93.1                     | 78.7                    | 15.46       | 0.06        |
| Xi H                                                                                                         | 1075                     | 22.40                              | 1.587                              | 15.31                                                       | 4.22                                                       | 0.32  | 80.4                     | 88.7                    | 24.84       | 0.15        |
| Xi I                                                                                                         | 1250                     | 55.95                              | 13.98                              | 84.72                                                       | 1.74                                                       | 0.036 | 57.3                     | 92.8                    | 44.38       | 0.50        |
| Xi J                                                                                                         | 1700                     | 82.13                              | 19.06                              | 240.8                                                       | 3.04                                                       | 0.027 | 15.3                     | 100.0                   | 17.58       | 0.78        |
| Integrated age ± 2σ                                                                                          |                          |                                    | n=10                               |                                                             | 42.3                                                       | 0.13  | K2O=0.53                 |                         | 24.9        | 2.0         |
| GTM-490-djk, wr, 27.42 mg, J=0.0007673±0.09%, D=1.004±0.001, NM-217D, Lab#=57804-01                          |                          |                                    |                                    |                                                             |                                                            |       |                          |                         |             |             |
| X A                                                                                                          | 550                      | 18011.2                            | 1.314                              | 60081.3                                                     | 0.240                                                      | 0.39  | 1.4                      | 4.0                     | 325.24      | 88.83       |
| X B                                                                                                          | 625                      | 88.65                              | 2.352                              | 275.6                                                       | 0.87                                                       | 0.22  | 8.4                      | 18.5                    | 10.25       | 1.13        |
| X C                                                                                                          | 700                      | 50.27                              | 4.163                              | 125.6                                                       | 0.91                                                       | 0.12  | 26.8                     | 33.7                    | 18.63       | 0.77        |
| X D                                                                                                          | 750                      | 41.36                              | 8.271                              | 89.35                                                       | 1.00                                                       | 0.062 | 37.8                     | 50.2                    | 21.64       | 0.57        |
| X E                                                                                                          | 800                      | 48.27                              | 12.57                              | 103.7                                                       | 0.70                                                       | 0.041 | 38.6                     | 61.8                    | 25.86       | 0.77        |
| X F                                                                                                          | 875                      | 39.94                              | 14.80                              | 77.03                                                       | 0.67                                                       | 0.034 | 46.1                     | 72.9                    | 25.55       | 0.87        |
| X G                                                                                                          | 975                      | 72.02                              | 17.55                              | 185.9                                                       | 0.523                                                      | 0.029 | 25.7                     | 81.6                    | 25.79       | 1.18        |
| X H                                                                                                          | 1075                     | 79.44                              | 19.49                              | 219.9                                                       | 0.288                                                      | 0.026 | 20.2                     | 86.3                    | 22.41       | 2.09        |
| X I                                                                                                          | 1250                     | 143.3                              | 95.23                              | 441.9                                                       | 0.148                                                      | 0.005 | 14.3                     | 88.8                    | 30.16       | 3.95        |
| X J                                                                                                          | 1700                     | 293.1                              | 68.13                              | 884.3                                                       | 0.67                                                       | 0.007 | 12.8                     | 100.0                   | 53.55       | 2.36        |
| Integrated age ± 2σ                                                                                          |                          |                                    | n=10                               |                                                             | 6.03                                                       | 0.028 | K2O=0.11                 |                         | 37.8        | 9.0         |
| OC-908-280805-djk, Groundmass Concentrate, 39.87 mg, J=0.0023±0.43%, D=1.0032±0.0012, NM-212F, Lab#=57453-01 |                          |                                    |                                    |                                                             |                                                            |       |                          |                         |             |             |
| X A                                                                                                          | 550                      | 95.60                              | 2.447                              | 300.0                                                       | 8.9                                                        | 0.21  | 7.5                      | 11.8                    | 29.5        | 2.0         |
| X B                                                                                                          | 625                      | 11.32                              | 2.978                              | 23.64                                                       | 4.55                                                       | 0.17  | 40.4                     | 17.8                    | 18.90       | 0.49        |
| X C                                                                                                          | 700                      | 7.204                              | 4.206                              | 8.754                                                       | 9.1                                                        | 0.12  | 68.9                     | 29.9                    | 20.51       | 0.23        |
| X D                                                                                                          | 750                      | 6.614                              | 5.538                              | 5.194                                                       | 7.5                                                        | 0.092 | 83.7                     | 39.9                    | 22.88       | 0.26        |
| X E                                                                                                          | 800                      | 6.426                              | 7.472                              | 4.469                                                       | 12.0                                                       | 0.068 | 89.1                     | 55.8                    | 23.68       | 0.24        |
| X F                                                                                                          | 875                      | 6.368                              | 8.966                              | 3.915                                                       | 13.3                                                       | 0.057 | 93.5                     | 73.4                    | 24.65       | 0.26        |
| X G                                                                                                          | 975                      | 6.700                              | 9.543                              | 4.950                                                       | 11.3                                                       | 0.053 | 89.9                     | 88.3                    | 24.96       | 0.30        |
| X H                                                                                                          | 1075                     | 7.798                              | 9.382                              | 11.26                                                       | 4.05                                                       | 0.054 | 67.3                     | 93.7                    | 21.75       | 0.45        |
| X I                                                                                                          | 1250                     | 11.98                              | 47.25                              | 44.82                                                       | 2.10                                                       | 0.011 | 22.0                     | 96.5                    | 11.3        | 1.6         |
| X J                                                                                                          | 1700                     | 16.09                              | 77.80                              | 64.53                                                       | 2.65                                                       | 0.007 | 21.4                     | 100.0                   | 15.1        | 2.2         |
| Integrated age ± 2σ                                                                                          |                          |                                    | n=10                               |                                                             | 75.5                                                       | 0.049 | K2O=0.32%                |                         | 23.23       | 0.81        |

| ID | Power/Temp<br>(Watts/°C) | <sup>40</sup> Ar/ <sup>39</sup> Ar | <sup>37</sup> Ar/ <sup>39</sup> Ar | <sup>36</sup> Ar/ <sup>39</sup> Ar<br>(x 10 <sup>-3</sup> ) | <sup>39</sup> Ar <sub>K</sub><br>(x 10 <sup>-15</sup> mol) | K/Ca | <sup>40</sup> Ar*<br>(%) | <sup>39</sup> Ar<br>(%) | Age<br>(Ma) | ±1σ<br>(Ma) |
|----|--------------------------|------------------------------------|------------------------------------|-------------------------------------------------------------|------------------------------------------------------------|------|--------------------------|-------------------------|-------------|-------------|
|----|--------------------------|------------------------------------|------------------------------------|-------------------------------------------------------------|------------------------------------------------------------|------|--------------------------|-------------------------|-------------|-------------|

---

**Notes:**

Isotopic ratios corrected for blank, radioactive decay, and mass discrimination, not corrected for interfering reactions.

Errors quoted for individual analyses include analytical error only, without interfering reaction or J uncertainties.

Integrated age calculated by summing isotopic measurements of all steps.

Integrated age error calculated by quadratically combining errors of isotopic measurements of all steps.

Plateau age is inverse-variance-weighted mean of selected steps.

Plateau age error is inverse-variance-weighted mean error (Taylor, 1982) times root MSWD where MSWD>1.

Plateau error is weighted error of Taylor (1982).

Decay constants and isotopic abundances after Steiger and Jäger (1977).

# symbol preceding sample ID denotes analyses excluded from plateau age calculations.

Weight percent K<sub>2</sub>O calculated from <sup>39</sup>Ar signal, sample weight, and instrument sensitivity.

Ages calculated relative to FC-2 Fish Canyon Tuff sanidine interlaboratory standard at 28.02 Ma

Decay Constant (LambdaK (total)) = 5.543e-10/a

Correction factors:

$$(^{39}\text{Ar}/^{37}\text{Ar})_{\text{Ca}} = 0.00068 \pm 2\text{e-}05$$

$$(^{36}\text{Ar}/^{37}\text{Ar})_{\text{Ca}} = 0.00028 \pm 1\text{e-}05$$

$$(^{38}\text{Ar}/^{39}\text{Ar})_{\text{K}} = 0.0125$$

$$(^{40}\text{Ar}/^{39}\text{Ar})_{\text{K}} = 0 \pm 0.0004$$


---

**Table 6.  $^{40}\text{Ar}/^{39}\text{Ar}$  analytical data.**

| ID                                                                                                            | $^{40}\text{Ar}/^{39}\text{Ar}$ | $^{37}\text{Ar}/^{39}\text{Ar}$ | $^{36}\text{Ar}/^{39}\text{Ar}$<br>( $\times 10^{-3}$ ) | $^{39}\text{Ar}_K$<br>( $\times 10^{-15}$ mol) | K/Ca            | $^{40}\text{Ar}^*$<br>(%) | Age<br>(Ma) | $\pm 1\sigma$<br>(Ma) |
|---------------------------------------------------------------------------------------------------------------|---------------------------------|---------------------------------|---------------------------------------------------------|------------------------------------------------|-----------------|---------------------------|-------------|-----------------------|
| <b>OC-759-300605-djk</b> , Biotite, 4 mg, J=0.0007753 $\pm$ 0.10%, D=1.0068 $\pm$ 0.0015, NM-208M, Lab#=57205 |                                 |                                 |                                                         |                                                |                 |                           |             |                       |
| 11B                                                                                                           | 62.11                           | 0.0198                          | 161.8                                                   | 0.336                                          | 25.8            | 23.0                      | 19.9        | 1.2                   |
| 05B                                                                                                           | 40.33                           | 0.0792                          | 81.33                                                   | 0.376                                          | 6.4             | 40.4                      | 22.66       | 0.83                  |
| 14B                                                                                                           | 45.95                           | 0.0578                          | 98.85                                                   | 1.692                                          | 8.8             | 36.4                      | 23.27       | 0.36                  |
| 13B                                                                                                           | 45.66                           | 0.0969                          | 97.78                                                   | 2.604                                          | 5.3             | 36.7                      | 23.31       | 0.29                  |
| 12B                                                                                                           | 46.45                           | 0.0836                          | 100.3                                                   | 1.385                                          | 6.1             | 36.2                      | 23.37       | 0.37                  |
| 07B                                                                                                           | 46.95                           | 0.0929                          | 101.2                                                   | 1.581                                          | 5.5             | 36.3                      | 23.71       | 0.36                  |
| 10B                                                                                                           | 46.00                           | 0.0510                          | 97.78                                                   | 1.611                                          | 10.0            | 37.2                      | 23.78       | 0.31                  |
| 06B                                                                                                           | 37.26                           | 0.0584                          | 67.85                                                   | 1.182                                          | 8.7             | 46.2                      | 23.92       | 0.36                  |
| 08B                                                                                                           | 37.62                           | 0.0917                          | 68.98                                                   | 1.897                                          | 5.6             | 45.8                      | 23.96       | 0.33                  |
| 09B                                                                                                           | 51.94                           | 0.0668                          | 117.2                                                   | 1.038                                          | 7.6             | 33.3                      | 24.04       | 0.49                  |
| 04B                                                                                                           | 43.01                           | 0.0325                          | 86.04                                                   | 0.694                                          | 15.7            | 40.9                      | 24.42       | 0.55                  |
| 03B                                                                                                           | 39.17                           | 0.0636                          | 71.41                                                   | 0.569                                          | 8.0             | 46.1                      | 25.11       | 0.50                  |
| 02C                                                                                                           | 53.69                           | -0.3131                         | 61.92                                                   | 0.005                                          | -               | 65.9                      | 48.8        | 36.9                  |
| 02B                                                                                                           | 64.13                           | 3.922                           | -206.1516                                               | 0.002                                          | 0.13            | 195.5                     | 167.8       | 122.1                 |
| <b>Mean age <math>\pm 2\sigma</math></b>                                                                      | n=11                            | MSWD=1.68                       |                                                         |                                                | 8.0 $\pm$ 6.0   |                           | 23.73       | 0.30                  |
| <b>OC-808-180805-djk</b> , Biotite, J=0.0007763 $\pm$ 0.10%, D=1.0044 $\pm$ 0.001, NM-208M, Lab#=57206        |                                 |                                 |                                                         |                                                |                 |                           |             |                       |
| 08B                                                                                                           | 71.83                           | -0.0327                         | 194.5                                                   | 0.104                                          | -               | 20.0                      | 20.0        | 2.5                   |
| 04B                                                                                                           | 50.25                           | 0.1268                          | 119.5                                                   | 0.142                                          | 4.0             | 29.7                      | 20.8        | 2.1                   |
| 15B                                                                                                           | 45.21                           | 0.0055                          | 101.5                                                   | 0.616                                          | 92.7            | 33.7                      | 21.18       | 0.70                  |
| 03B                                                                                                           | 40.86                           | 0.1096                          | 85.41                                                   | 0.228                                          | 4.7             | 38.2                      | 21.8        | 1.5                   |
| 05B                                                                                                           | 55.10                           | 0.0270                          | 133.4                                                   | 0.190                                          | 18.9            | 28.5                      | 21.9        | 1.5                   |
| 17B                                                                                                           | 48.13                           | 0.0537                          | 107.9                                                   | 0.656                                          | 9.5             | 33.8                      | 22.61       | 0.58                  |
| 14B                                                                                                           | 55.23                           | 0.0399                          | 130.8                                                   | 0.436                                          | 12.8            | 30.0                      | 23.08       | 0.74                  |
| 11B                                                                                                           | 58.45                           | 0.0934                          | 141.5                                                   | 0.542                                          | 5.5             | 28.5                      | 23.16       | 0.56                  |
| 02B                                                                                                           | 30.64                           | 0.0067                          | 46.61                                                   | 0.519                                          | 76.6            | 55.0                      | 23.47       | 0.68                  |
| 16B                                                                                                           | 47.05                           | 0.0448                          | 101.8                                                   | 1.036                                          | 11.4            | 36.1                      | 23.61       | 0.46                  |
| 13B                                                                                                           | 47.82                           | 0.0250                          | 104.1                                                   | 0.522                                          | 20.4            | 35.7                      | 23.74       | 0.76                  |
| 09B                                                                                                           | 43.66                           | -0.2811                         | 89.33                                                   | 0.108                                          | -               | 39.5                      | 24.0        | 2.3                   |
| 06B                                                                                                           | 40.60                           | -0.0189                         | 79.03                                                   | 0.377                                          | -               | 42.5                      | 23.99       | 0.80                  |
| 12B                                                                                                           | 50.75                           | 0.0309                          | 113.0                                                   | 0.614                                          | 16.5            | 34.2                      | 24.16       | 0.58                  |
| 07B                                                                                                           | 71.87                           | -0.1255                         | 183.6                                                   | 0.170                                          | -               | 24.5                      | 24.5        | 1.8                   |
| <b>Mean age <math>\pm 2\sigma</math></b>                                                                      | n=15                            | MSWD=1.43                       |                                                         |                                                | 24.8 $\pm$ 51.9 |                           | 23.18       | 0.48                  |
| <b>OC-379-111104-djk</b> , Biotite, J=0.0007771 $\pm$ 0.09%, D=1.0044 $\pm$ 0.001, NM-208M, Lab#=57207        |                                 |                                 |                                                         |                                                |                 |                           |             |                       |
| 13B                                                                                                           | 75.26                           | 0.2686                          | 230.7                                                   | 0.424                                          | 1.9             | 9.4                       | 9.93        | 0.84                  |
| 05B                                                                                                           | 89.89                           | 0.0721                          | 278.3                                                   | 0.149                                          | 7.1             | 8.5                       | 10.7        | 1.9                   |
| 02B                                                                                                           | 33.59                           | 0.0898                          | 85.31                                                   | 2.171                                          | 5.7             | 25.0                      | 11.73       | 0.33                  |
| 10B                                                                                                           | 113.3                           | 0.1279                          | 351.5                                                   | 0.428                                          | 4.0             | 8.4                       | 13.3        | 1.6                   |
| 07B                                                                                                           | 46.75                           | 0.0884                          | 125.9                                                   | 0.984                                          | 5.8             | 20.5                      | 13.36       | 0.52                  |
| 06B                                                                                                           | 99.70                           | 0.1964                          | 303.4                                                   | 0.826                                          | 2.6             | 10.1                      | 14.07       | 0.92                  |
| 04B                                                                                                           | 178.3                           | 0.1072                          | 568.7                                                   | 0.534                                          | 4.8             | 5.7                       | 14.3        | 1.5                   |
| 12B                                                                                                           | 156.6                           | 0.0473                          | 494.6                                                   | 0.802                                          | 10.8            | 6.7                       | 14.6        | 1.2                   |
| 09B                                                                                                           | 71.89                           | 0.1172                          | 205.6                                                   | 0.167                                          | 4.4             | 15.5                      | 15.5        | 1.7                   |
| 11B                                                                                                           | 171.2                           | 0.0661                          | 541.1                                                   | 0.680                                          | 7.7             | 6.6                       | 15.8        | 1.4                   |
| 08B                                                                                                           | 109.8                           | 0.1476                          | 331.4                                                   | 0.585                                          | 3.5             | 10.9                      | 16.6        | 1.1                   |
| 03B                                                                                                           | 167.2                           | 0.0656                          | 523.9                                                   | 0.744                                          | 7.8             | 7.4                       | 17.4        | 1.3                   |
| 01B                                                                                                           | 267.2                           | 0.1288                          | 856.0                                                   | 0.380                                          | 4.0             | 5.3                       | 19.8        | 2.0                   |
| <b>Mean age <math>\pm 2\sigma</math></b>                                                                      | n=13                            | MSWD=6.21                       |                                                         |                                                | 5.4 $\pm$ 4.9   |                           | 12.9        | 1.1                   |

| ID                                                                                                           | $^{40}\text{Ar}/^{39}\text{Ar}$ | $^{37}\text{Ar}/^{39}\text{Ar}$ | $^{36}\text{Ar}/^{39}\text{Ar}$<br>(x 10 <sup>-3</sup> ) | $^{39}\text{Ar}_K$<br>(x 10 <sup>-15</sup> mol) | K/Ca          | $^{40}\text{Ar}^*$<br>(%) | Age<br>(Ma) | $\pm 1\sigma$<br>(Ma) |
|--------------------------------------------------------------------------------------------------------------|---------------------------------|---------------------------------|----------------------------------------------------------|-------------------------------------------------|---------------|---------------------------|-------------|-----------------------|
| <b>unit-5c-NWchili-sect-djk</b> , Biotite, J=0.0007974 $\pm$ 0.06%, D=1.004 $\pm$ 0.001, NM-217L, Lab#=57850 |                                 |                                 |                                                          |                                                 |               |                           |             |                       |
| 13B                                                                                                          | 174.9                           | 0.0770                          | 576.8                                                    | 1.155                                           | 6.6           | 2.5                       | 6.4         | 1.3                   |
| 05B                                                                                                          | 169.8                           | 1.236                           | 557.0                                                    | 0.909                                           | 0.41          | 3.1                       | 7.6         | 1.3                   |
| 09B                                                                                                          | 275.2                           | 0.0911                          | 910.4                                                    | 0.597                                           | 5.6           | 2.2                       | 8.8         | 2.2                   |
| 26B                                                                                                          | 56.50                           | 0.1199                          | 168.4                                                    | 1.449                                           | 4.3           | 12.0                      | 9.69        | 0.57                  |
| 11B                                                                                                          | 200.0                           | 0.1073                          | 653.4                                                    | 1.141                                           | 4.8           | 3.4                       | 9.9         | 1.5                   |
| 07B                                                                                                          | 264.6                           | 0.1056                          | 871.8                                                    | 0.554                                           | 4.8           | 2.7                       | 10.1        | 2.3                   |
| 18B                                                                                                          | 57.77                           | 0.1551                          | 171.2                                                    | 5.168                                           | 3.3           | 12.4                      | 10.30       | 0.37                  |
| 20B                                                                                                          | 54.35                           | 0.0833                          | 159.0                                                    | 1.602                                           | 6.1           | 13.6                      | 10.59       | 0.51                  |
| 03C                                                                                                          | 130.8                           | 0.1184                          | 417.5                                                    | 0.780                                           | 4.3           | 5.7                       | 10.6        | 1.2                   |
| 28B                                                                                                          | 54.45                           | 0.4726                          | 158.1                                                    | 6.990                                           | 1.1           | 14.3                      | 11.15       | 0.34                  |
| 15B                                                                                                          | 86.04                           | 0.0803                          | 264.8                                                    | 2.807                                           | 6.4           | 9.1                       | 11.18       | 0.63                  |
| 59B                                                                                                          | 61.01                           | 0.0590                          | 179.7                                                    | 2.527                                           | 8.6           | 13.0                      | 11.35       | 0.46                  |
| 57B                                                                                                          | 53.01                           | 0.0769                          | 152.2                                                    | 5.236                                           | 6.6           | 15.2                      | 11.52       | 0.35                  |
| 17B                                                                                                          | 160.7                           | 0.1273                          | 516.6                                                    | 2.553                                           | 4.0           | 5.0                       | 11.6        | 1.0                   |
| 22B                                                                                                          | 52.99                           | 0.1055                          | 150.8                                                    | 2.998                                           | 4.8           | 15.9                      | 12.10       | 0.42                  |
| 24B                                                                                                          | 167.1                           | 0.0817                          | 536.0                                                    | 0.574                                           | 6.2           | 5.2                       | 12.5        | 1.6                   |
| 03B                                                                                                          | 66.82                           | -0.0036                         | 189.1                                                    | 0.019                                           | -             | 16.4                      | 15.6        | 9.0                   |
| X 01B                                                                                                        | 119.9                           | 0.1258                          | 343.4                                                    | 1.840                                           | 4.1           | 15.4                      | 26.37       | 0.78                  |
| <b>Mean age <math>\pm 2\sigma</math></b>                                                                     | n=17                            | MSWD=2.67                       |                                                          |                                                 | 4.9 $\pm$ 4.0 |                           | 10.97       | 0.47                  |

#### Notes:

Isotopic ratios corrected for blank, radioactive decay, and mass discrimination, not corrected for interfering reactions.

Errors quoted for individual analyses include analytical error only, without interfering reaction or J uncertainties.

Mean age is weighted mean age of Taylor (1982). Mean age error is weighted error

of the mean (Taylor, 1982), multiplied by the root of the MSWD where MSWD>1, and also incorporates uncertainty in J factors and irradiation correction uncertainties.

Decay constants and isotopic abundances after Steiger and Jäger (1977).

# symbol preceding sample ID denotes analyses excluded from mean age calculations.

Ages calculated relative to FC-2 Fish Canyon Tuff sanidine interlaboratory standard at 27.84 Ma

Decay Constant (LambdaK (total)) = 5.543e-10/a

Correction factors:

$$(^{39}\text{Ar}/^{37}\text{Ar})_{\text{Ca}} = 0.00068 \pm 2\text{e-}05$$

$$(^{36}\text{Ar}/^{37}\text{Ar})_{\text{Ca}} = 0.00028 \pm 1\text{e-}05$$

$$(^{38}\text{Ar}/^{39}\text{Ar})_K = 0.0125$$

$$(^{40}\text{Ar}/^{39}\text{Ar})_K = 0 \pm 0.0004$$

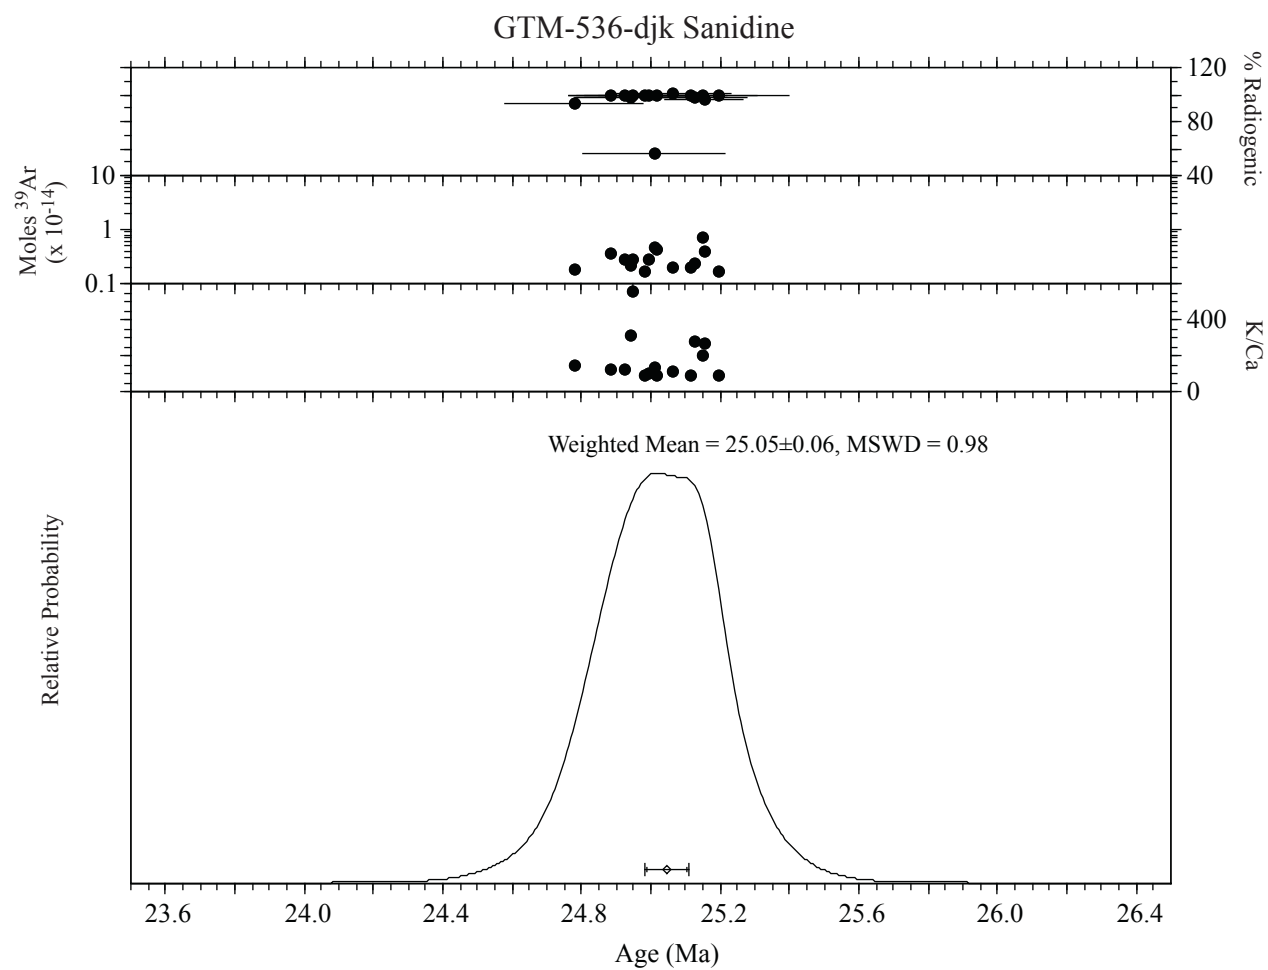

Figure 1. Age probability distribution diagram for GTM-536-djk sanidine. All errors quoted at 2 Sigma.

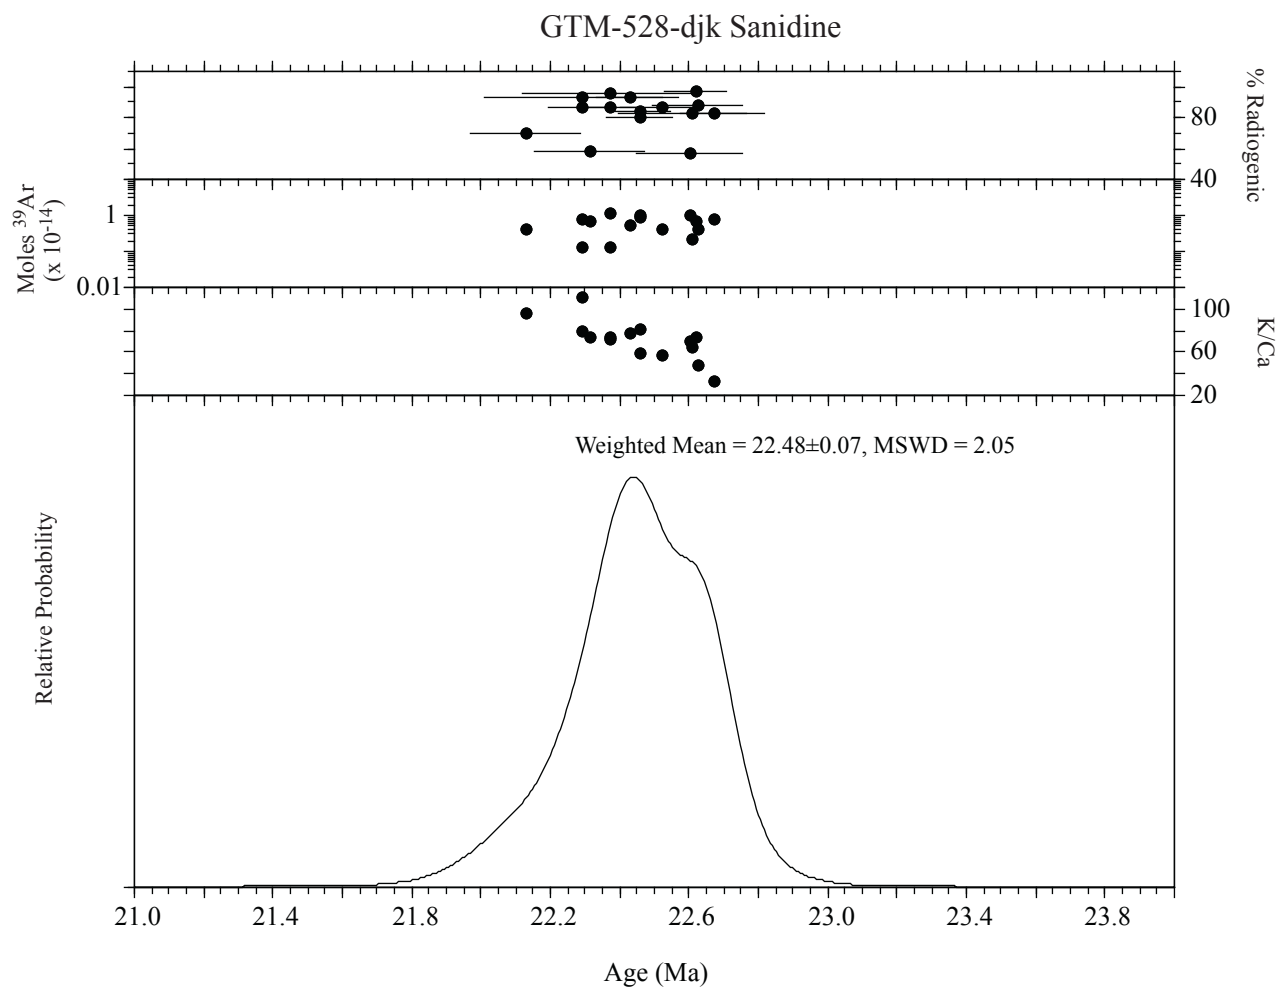

Figure 2. Age probability distribution diagram for GTM-528-djk sanidine. All errors quoted at 2 Sigma.

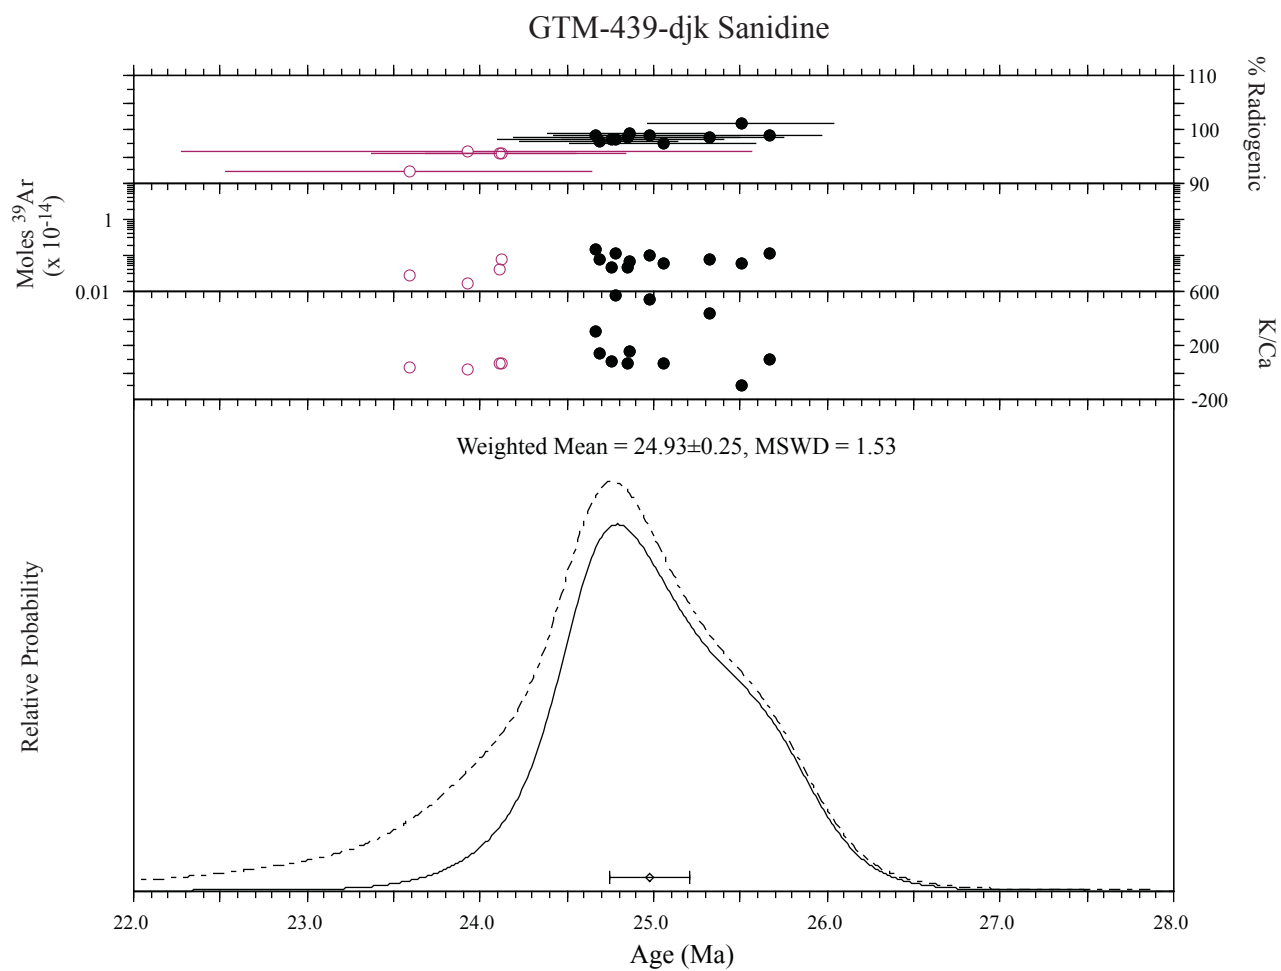

Figure 3. Age probability distribution diagram for GTM-439-djk sanidine. All errors quoted at 2 Sigma.

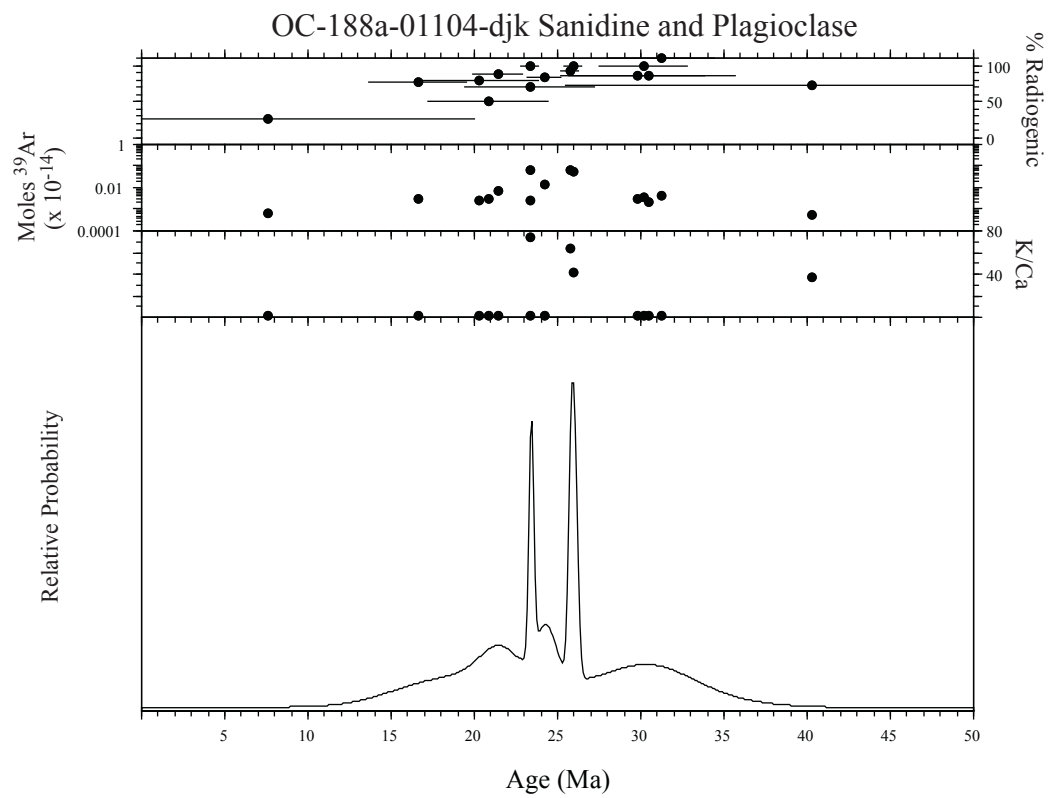

Figure 4. Age probability distribution diagram for OC-188a-01104-djk sanidine and plagioclase. All errors quoted at 2 Sigma.

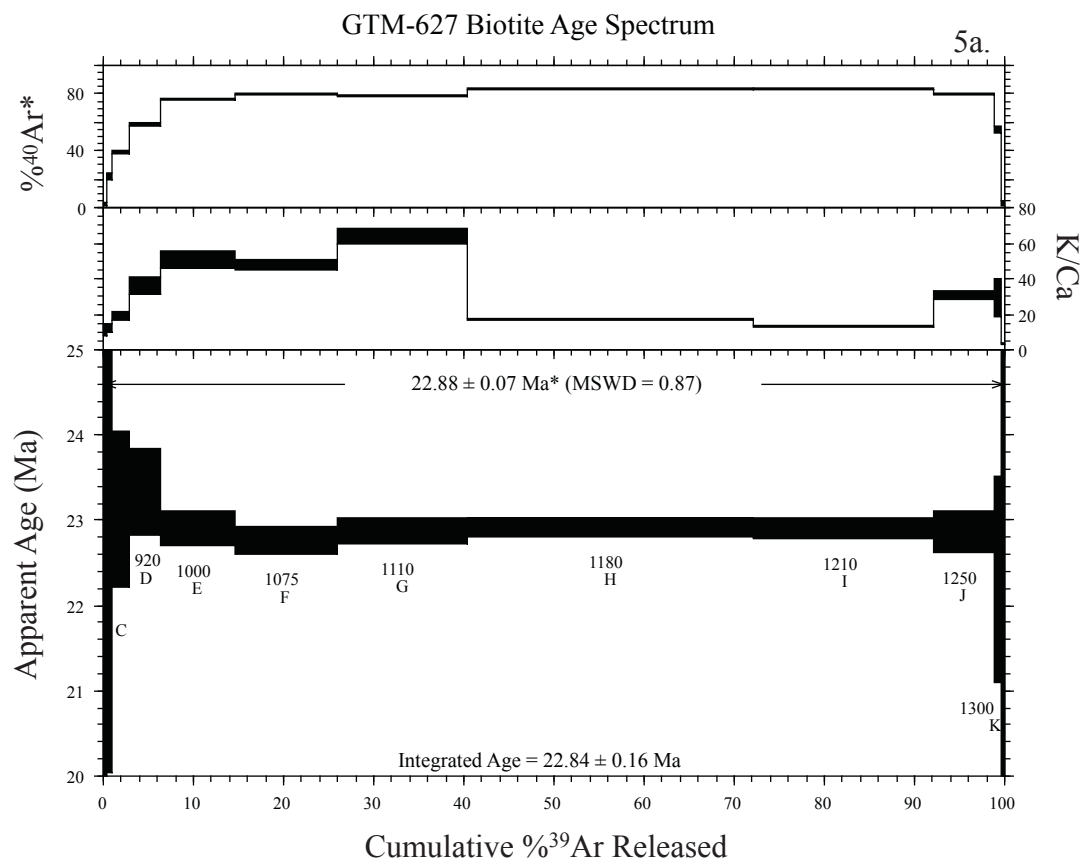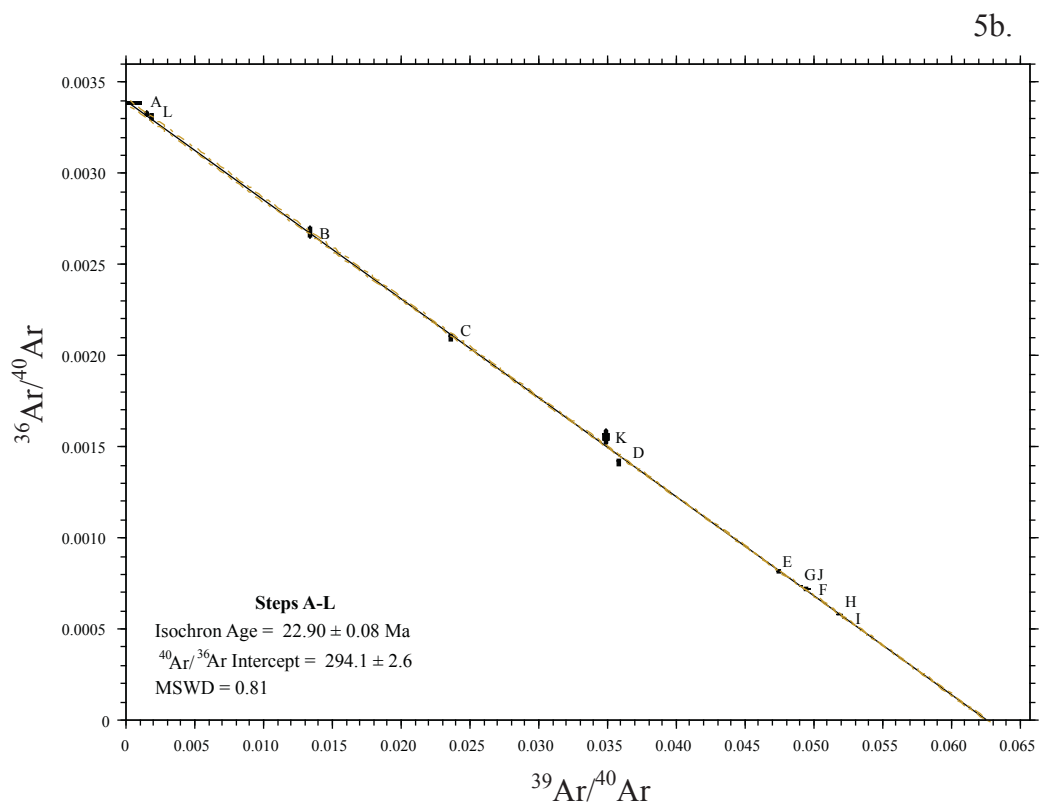

Figure 5. Age spectrum (5a) and isochron (5b) for GTM-627 biotite. All errors quoted at 2 sigma.

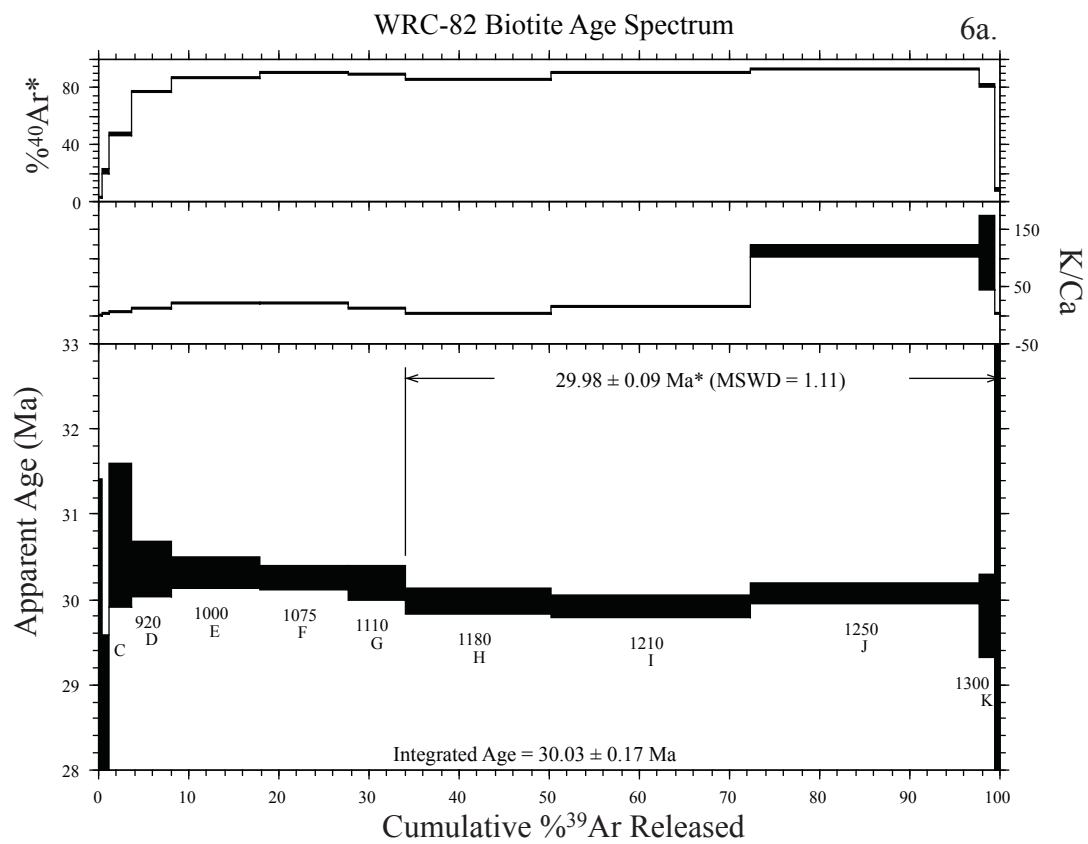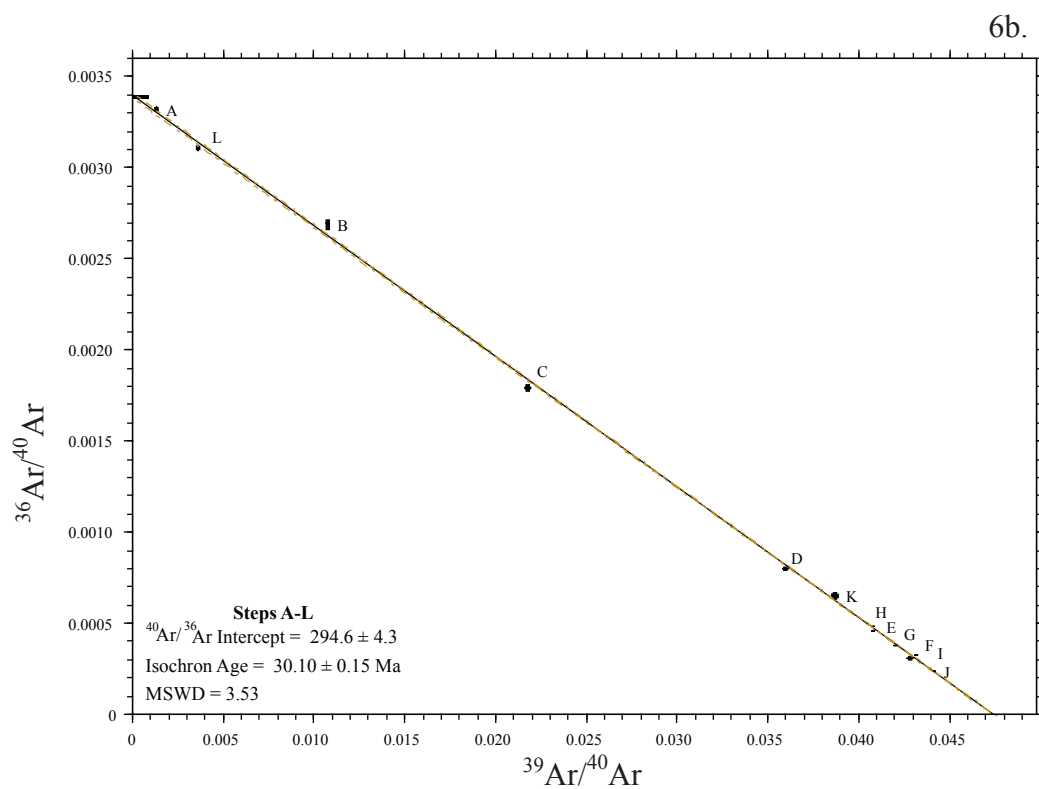

Figure 6. Age spectrum (6a) and isochron (6b) for WRC-82 biotite.

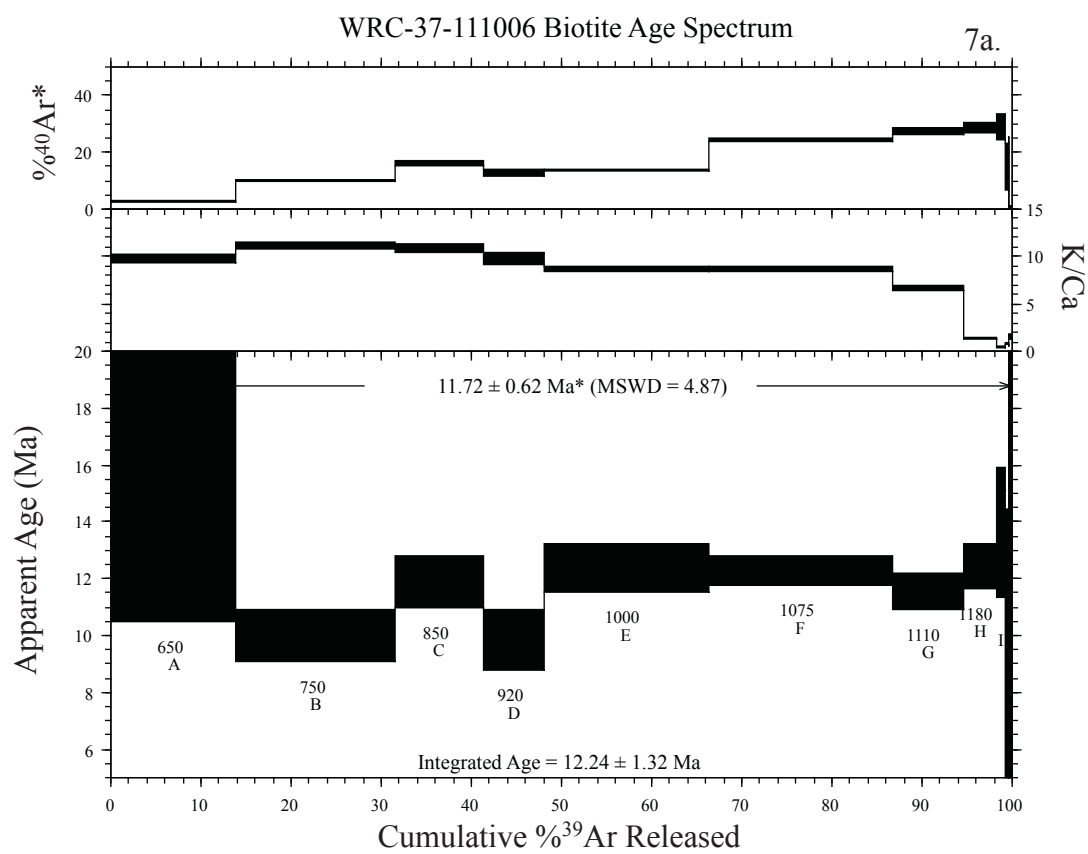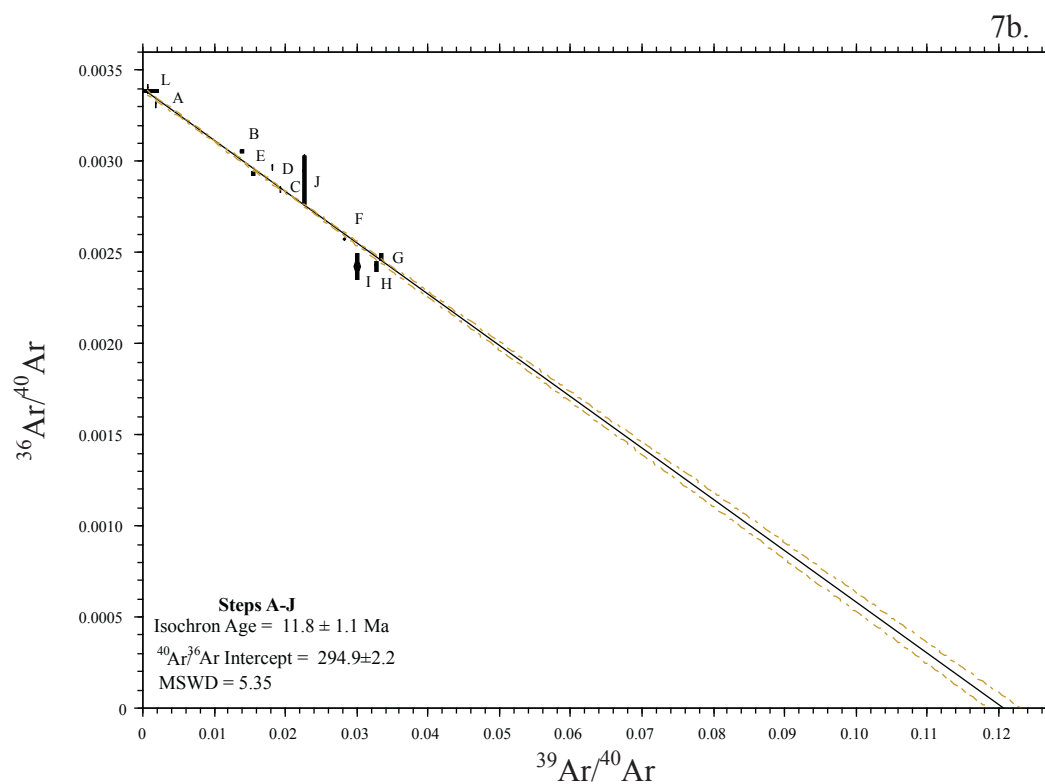

Figure 7. Age spectrum (7a) and isochron (7b) for WRC-37-111006-djk biotite.

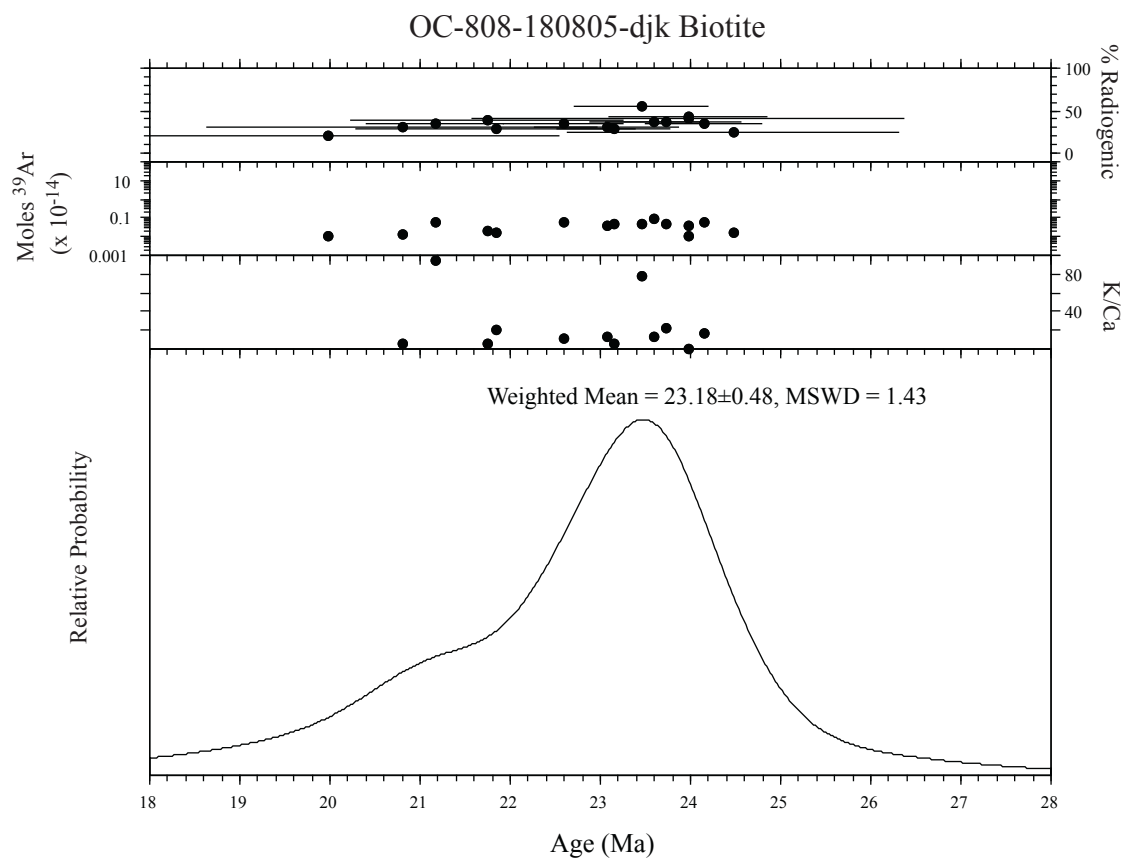

Figure 8. Age probability distribution diagram for OC-808-180805-djk biotite. All errors quoted at 2 Sigma.

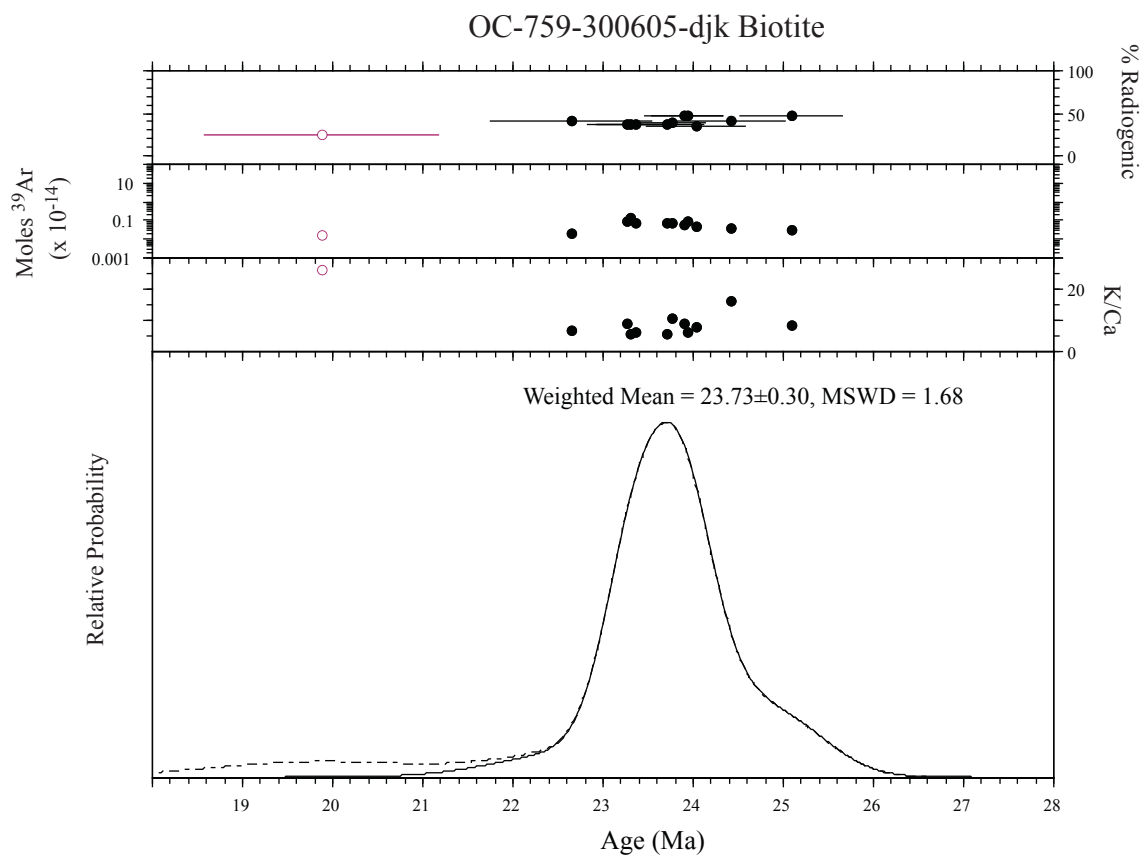

Figure 9. Age probability distribution diagram for OC-759-300605-djk biotite. All errors quoted at 2 Sigma.

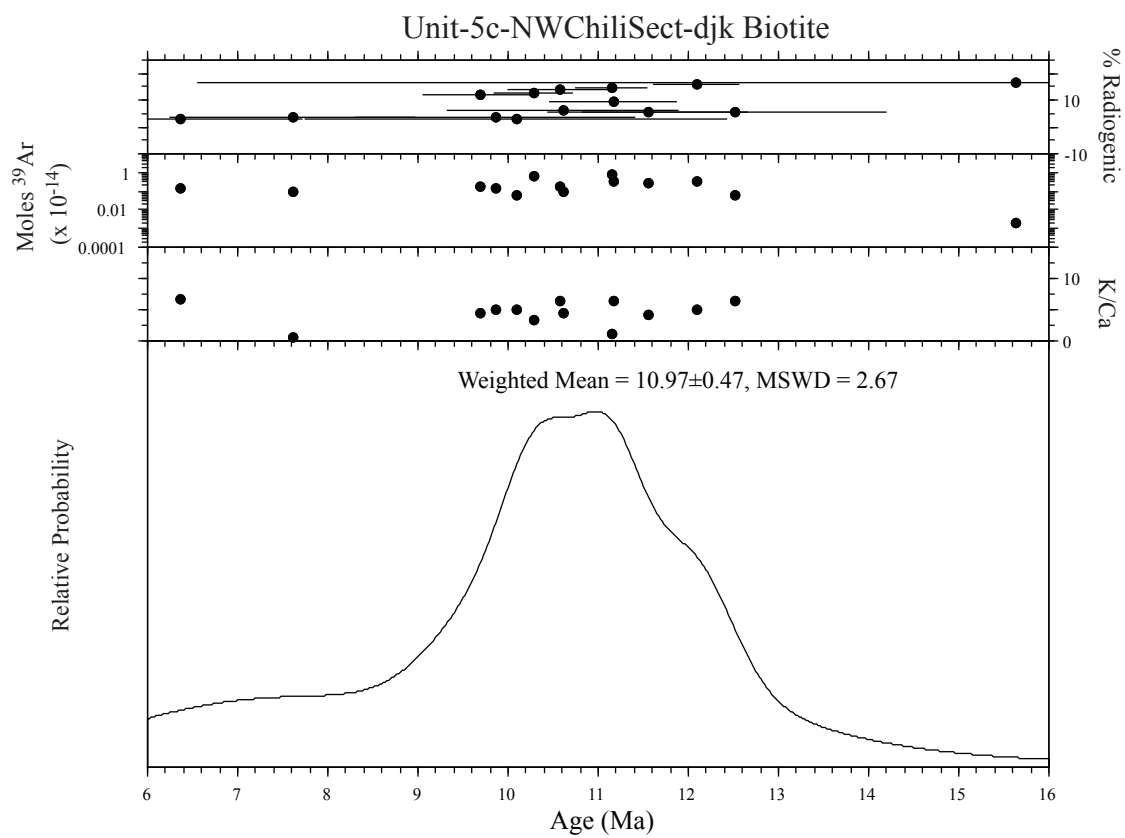

Figure 10. Age probability distribution diagram for Unit-5c-NWChiliSect-djk biotite. All errors quoted at 2 Sigma.

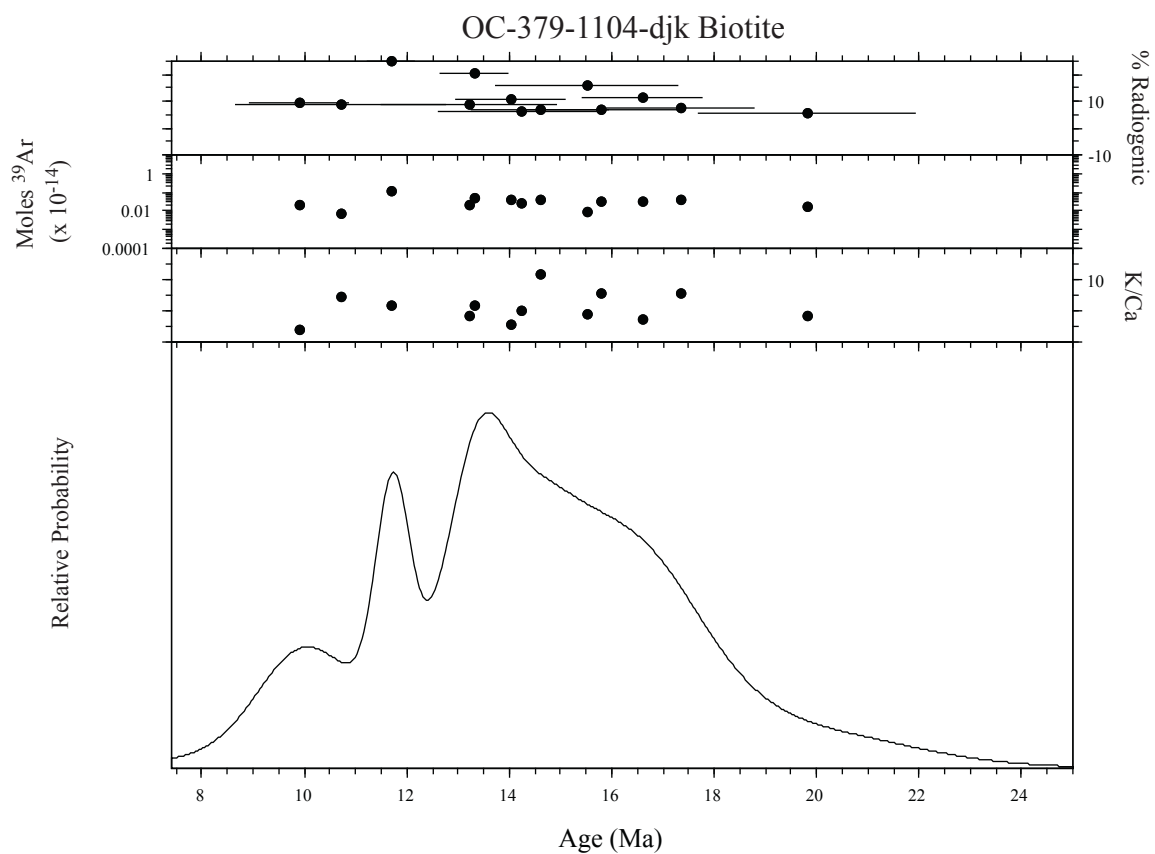

Figure 11. Age probability distribution diagram for Unit-5c-NWChiliSect-djk biotite. All errors quoted at 2 Sigma.

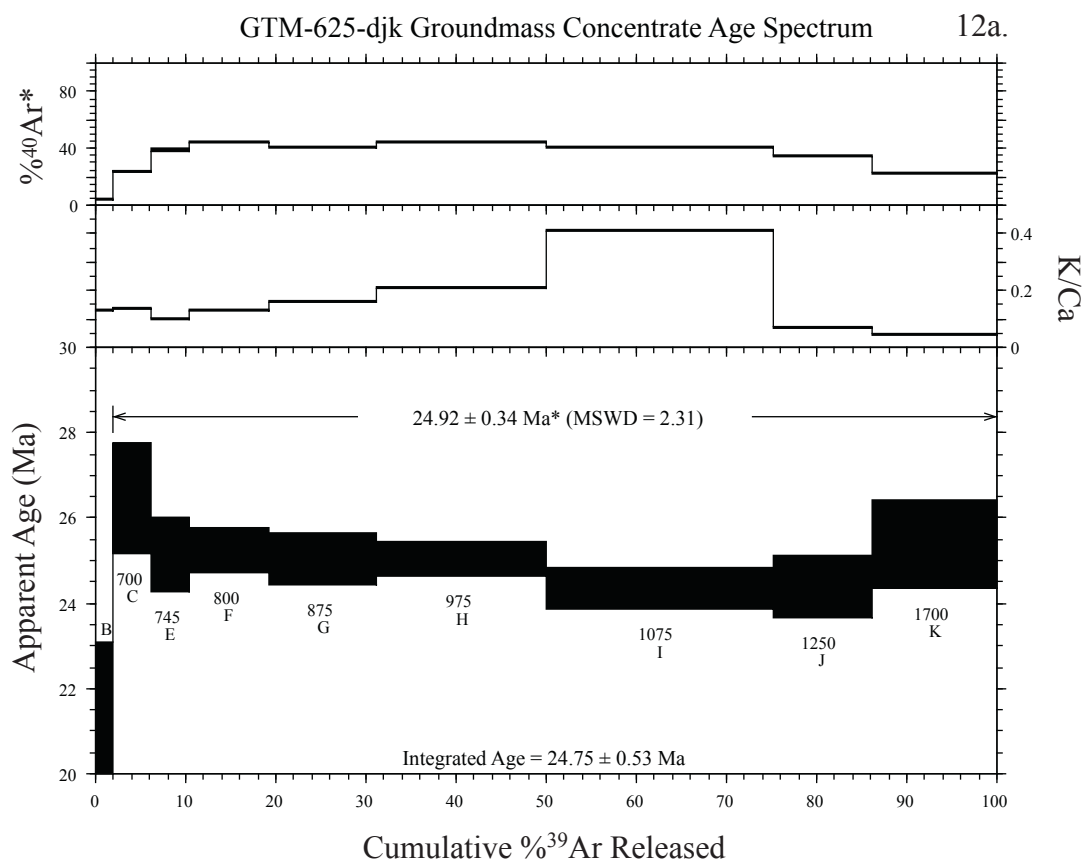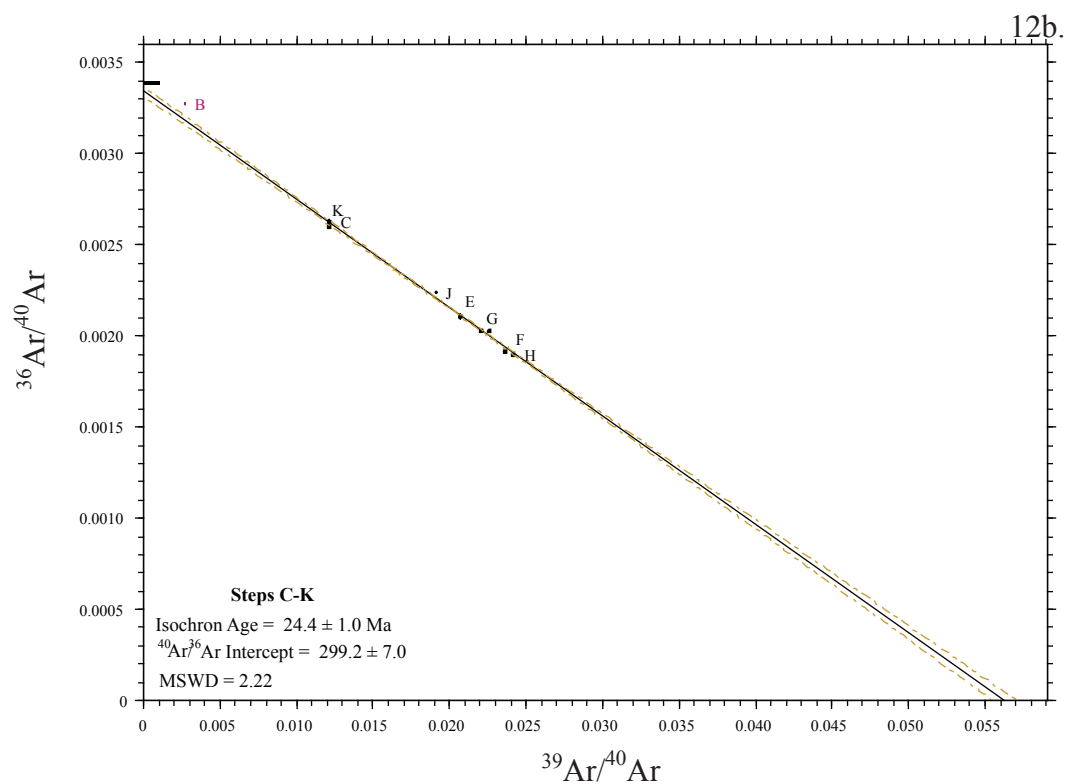

Figure 12. Age spectrum (12a) and isochron (12b) for GTM-625-djk groundmass concentrate.

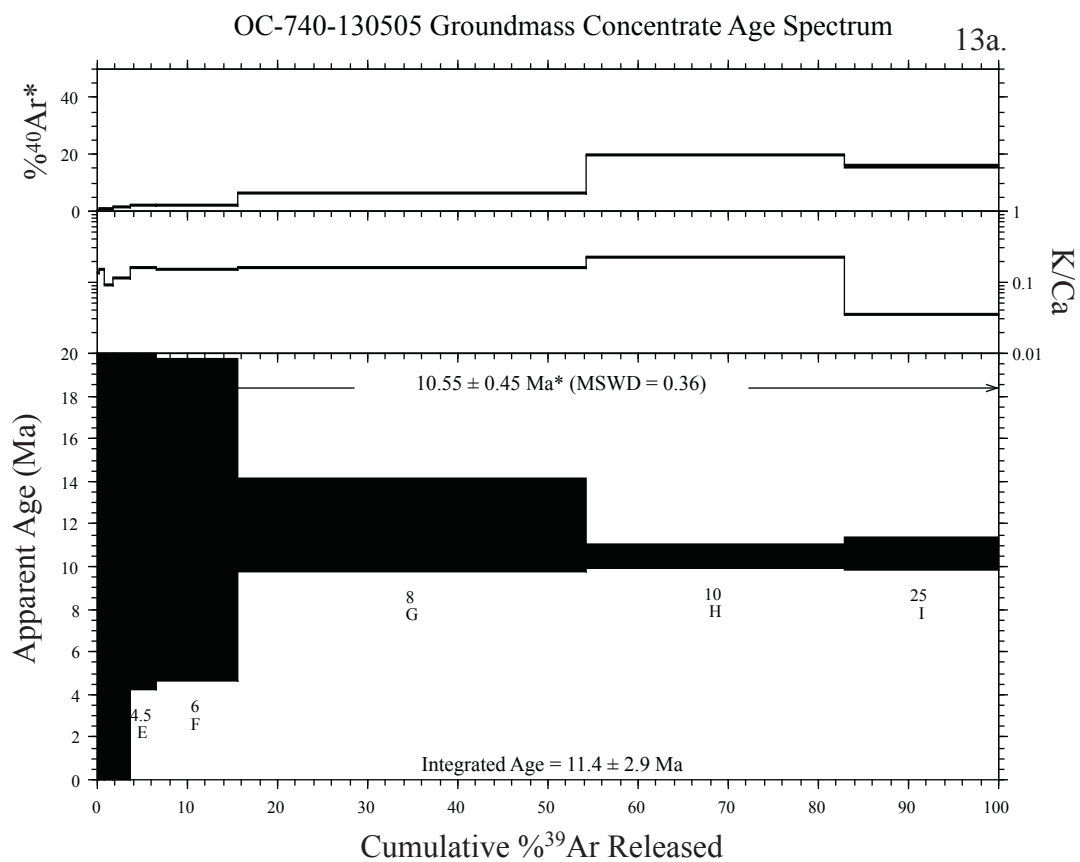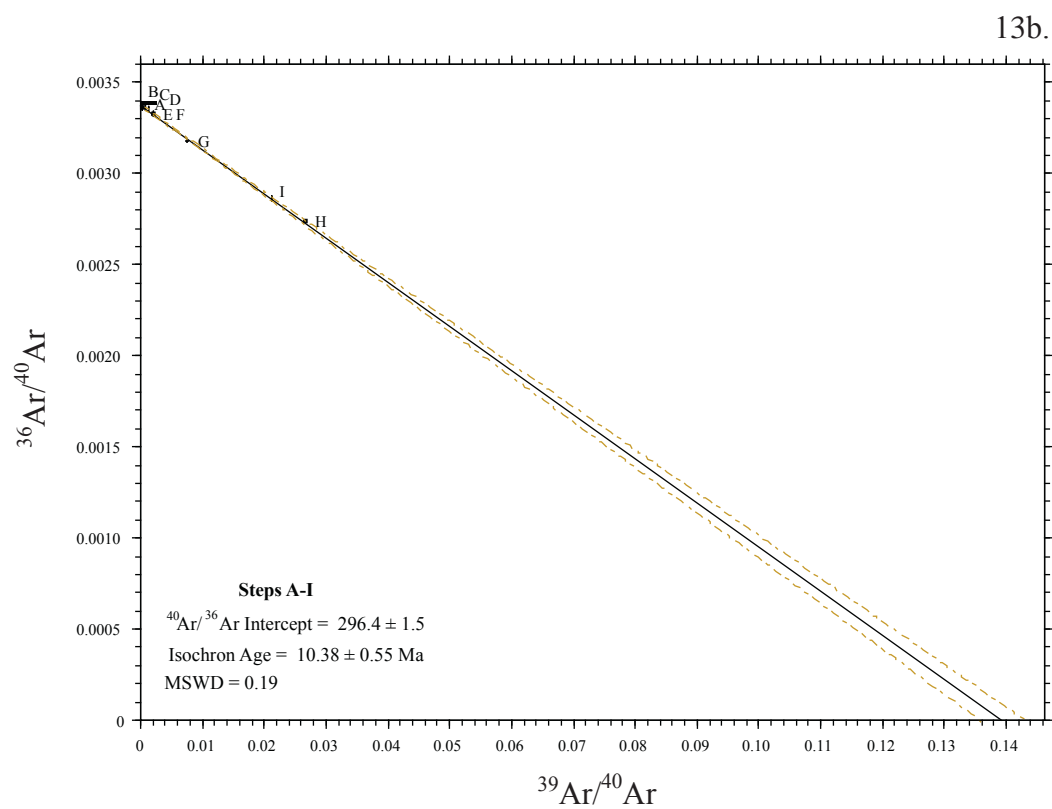

Figure 13. Age spectrum (13a) and isochron (13b) for OC-740-130505 groundmass concentrate.

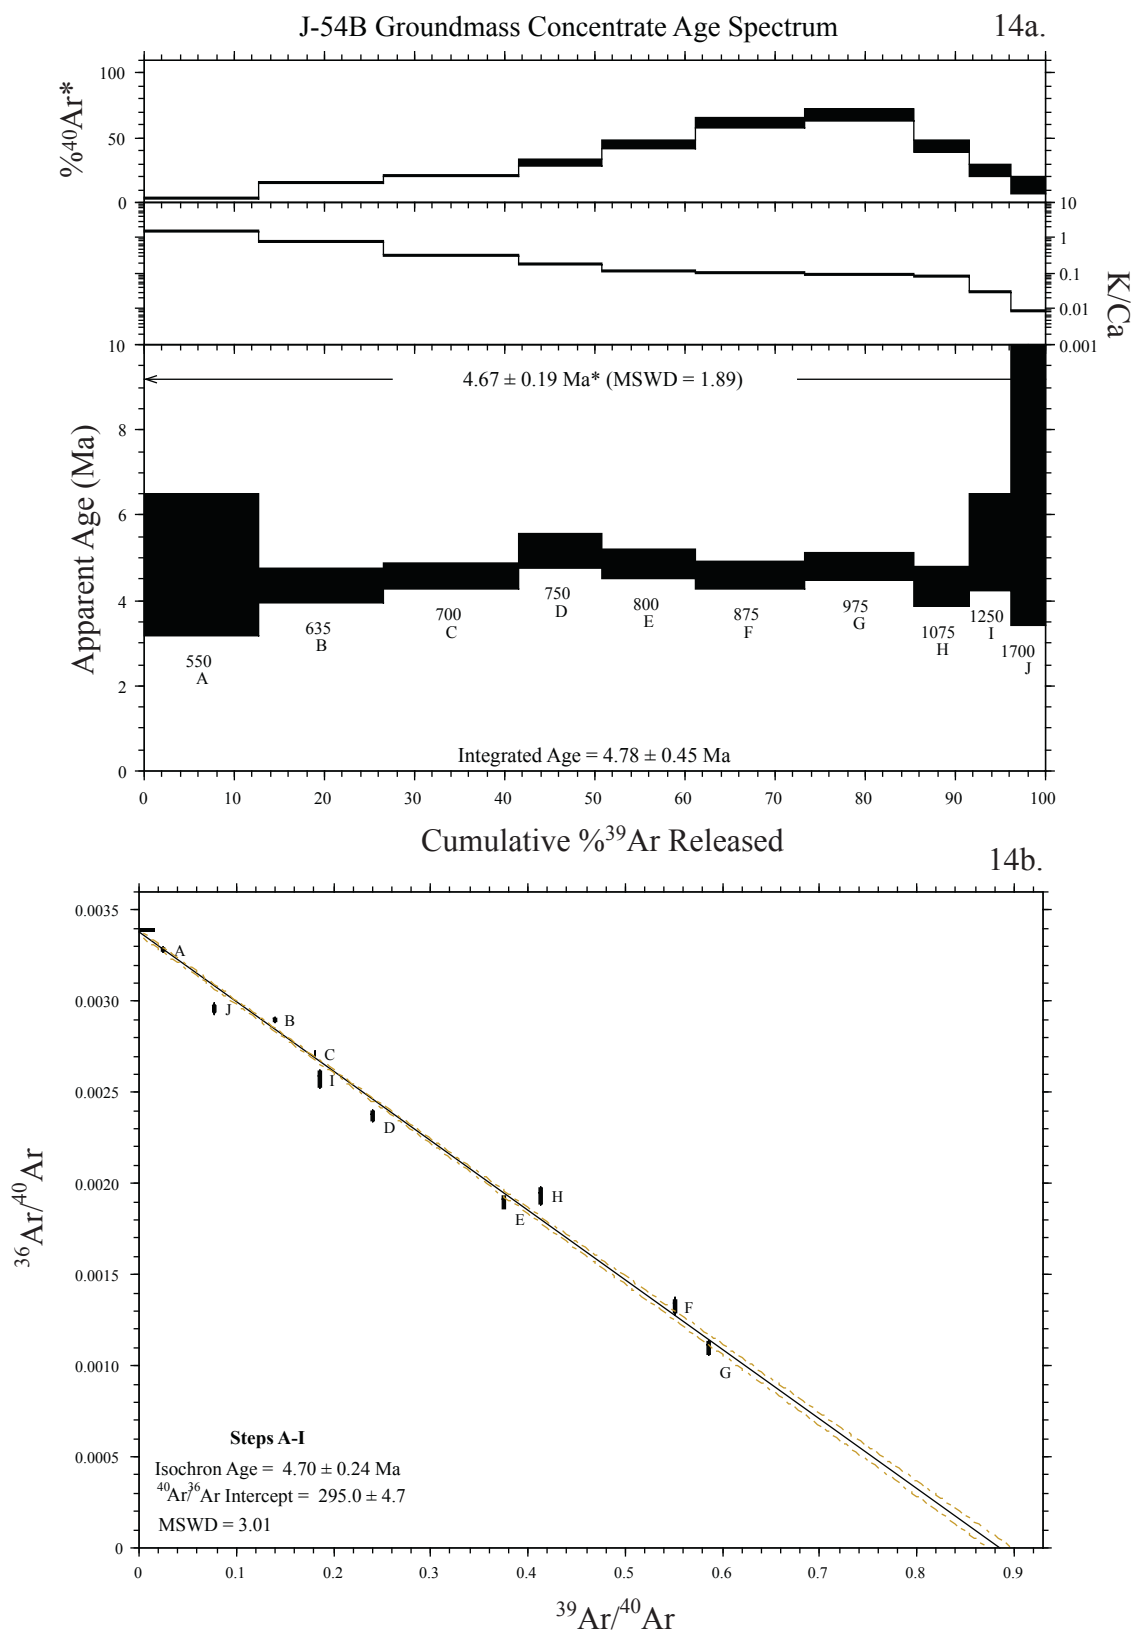

Figure 14. Age spectrum (14a) and isochron (14b) for J-54B groundmass concentrate.

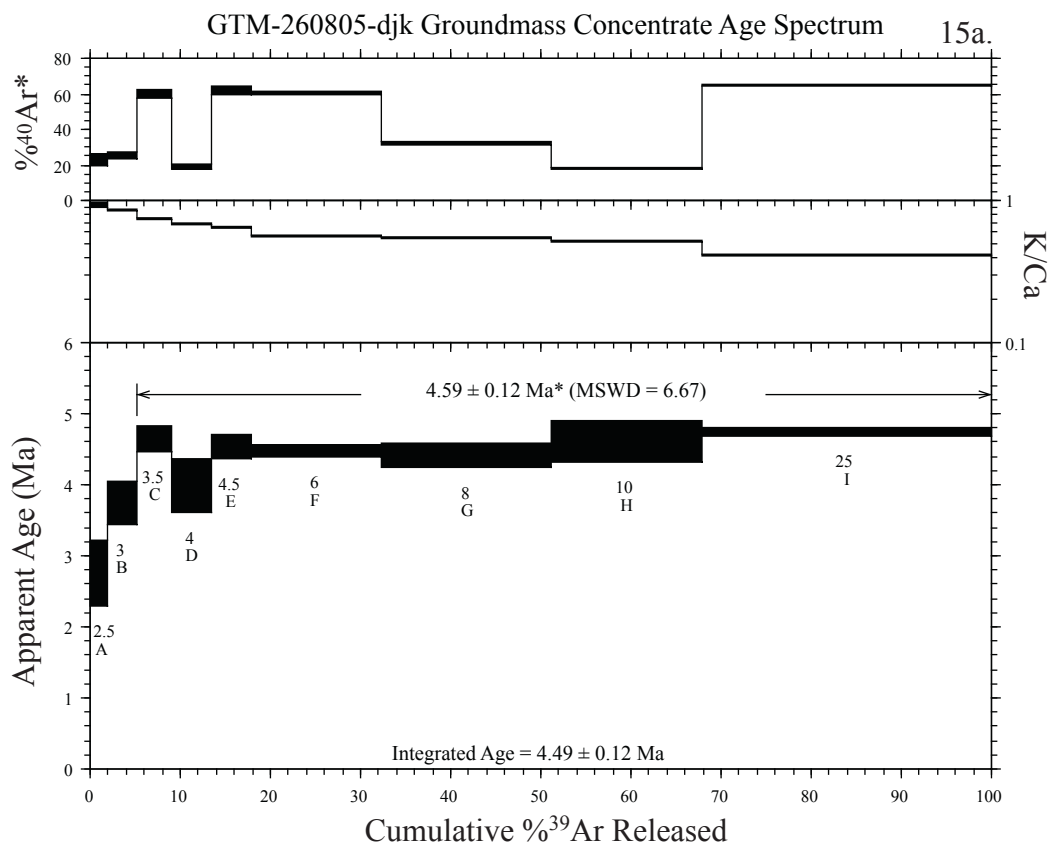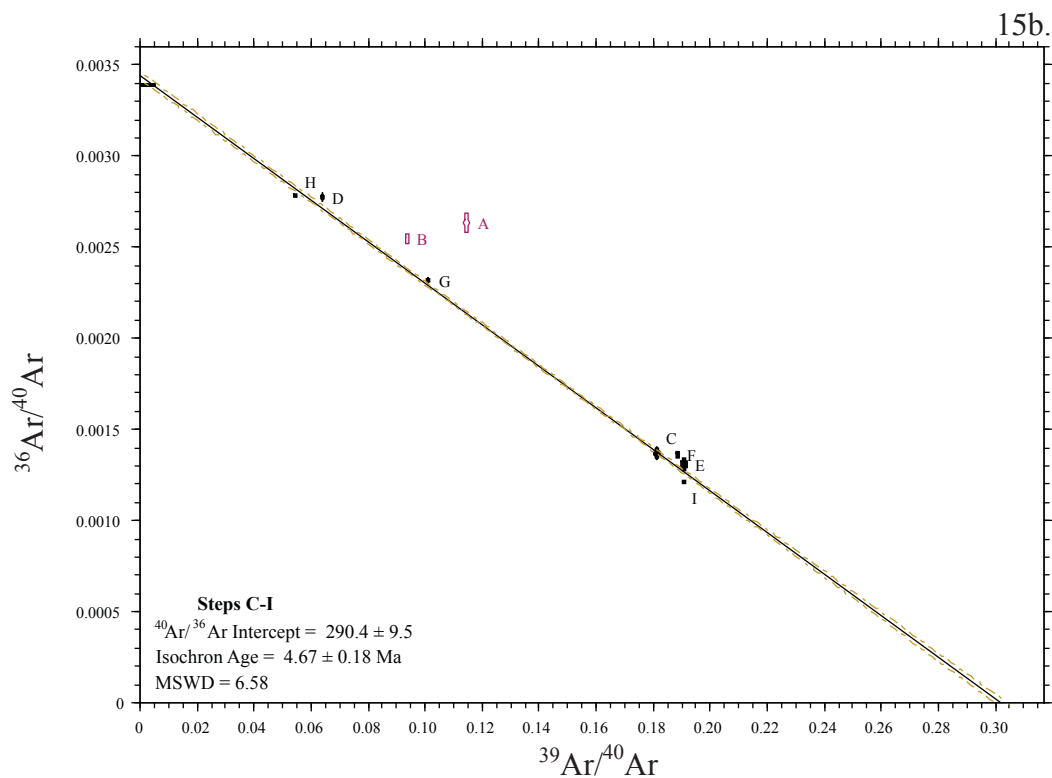

Figure 15. Age spectrum (15a) and isochron (15b) for GTM-260805-djk basalt.

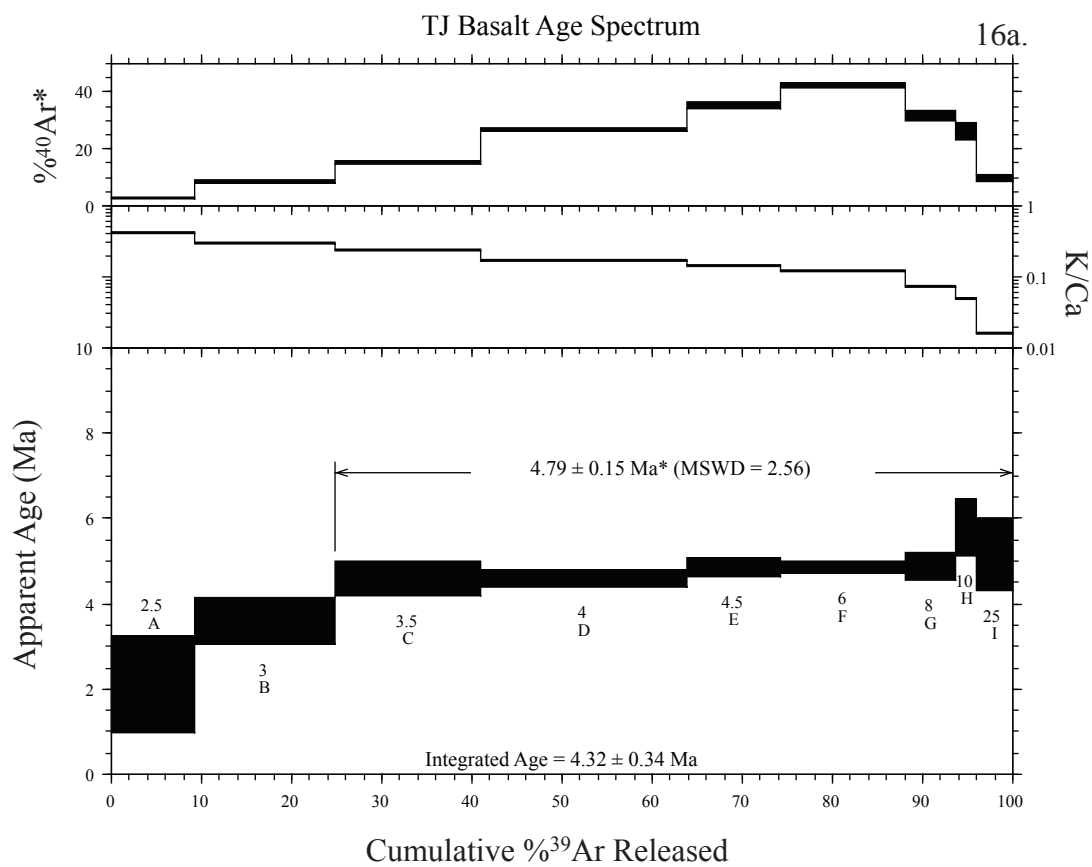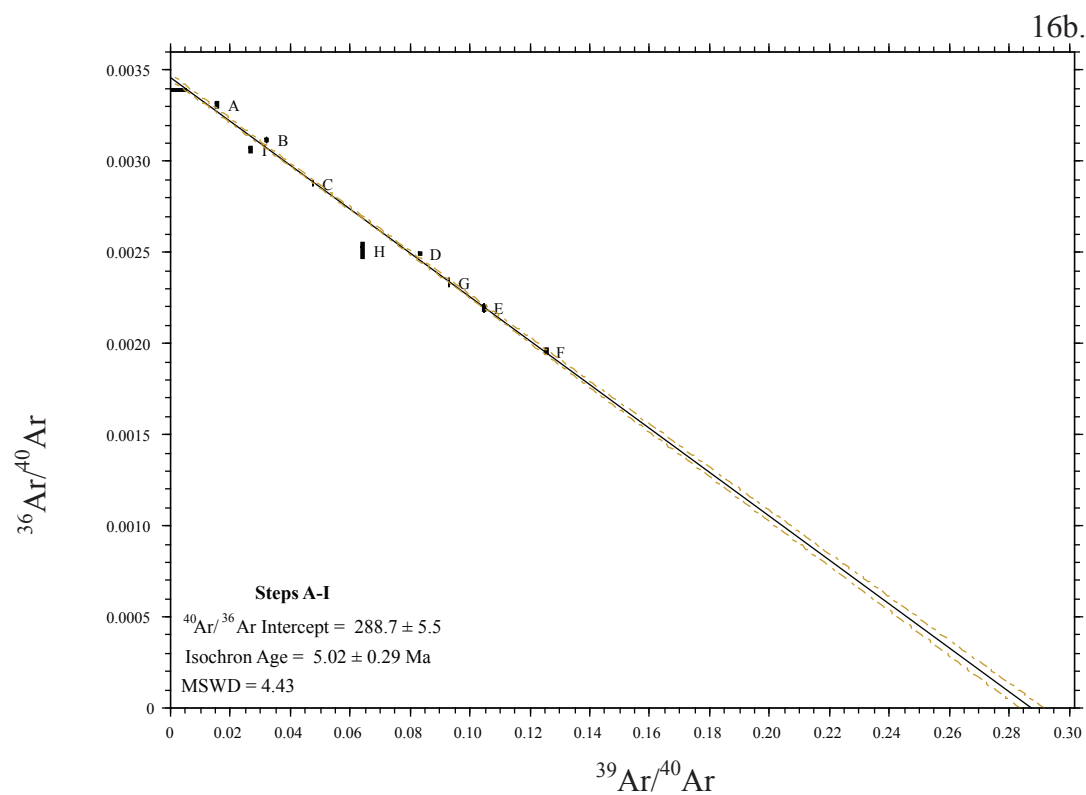

Figure 16. Age spectrum (16a) and isochron (16b) for TJ basalt.

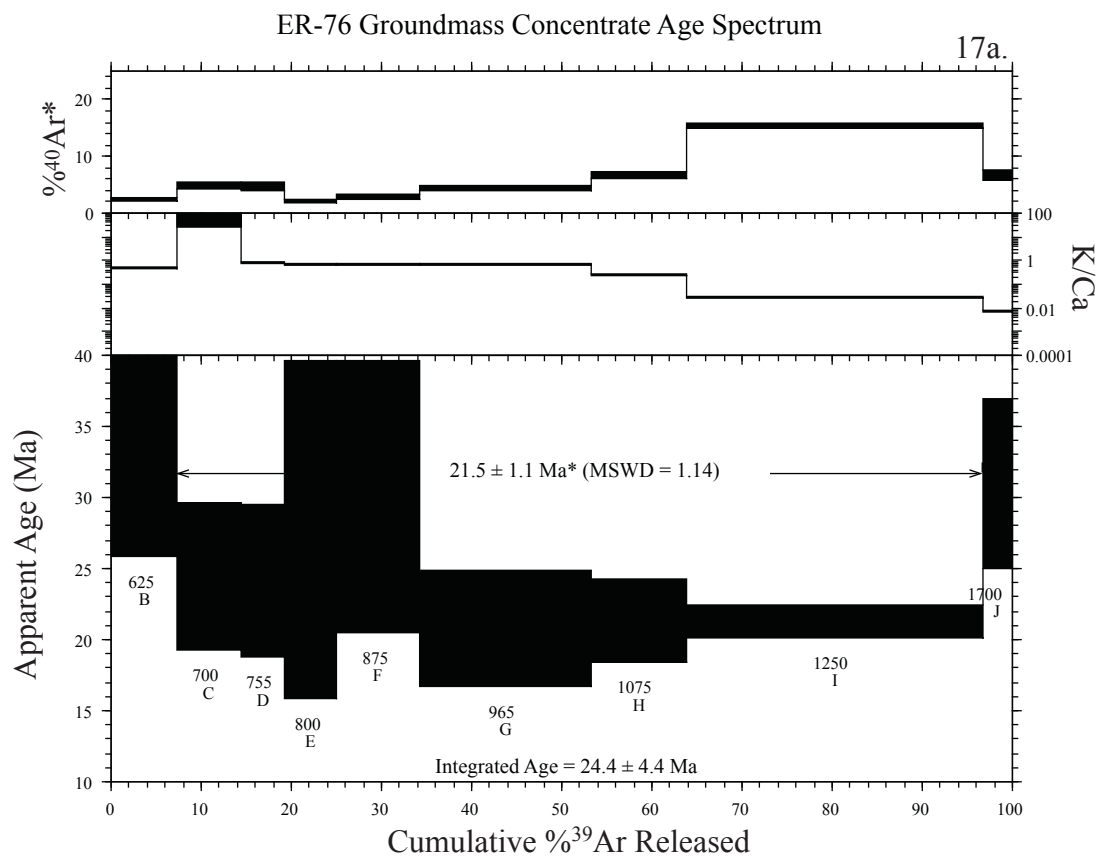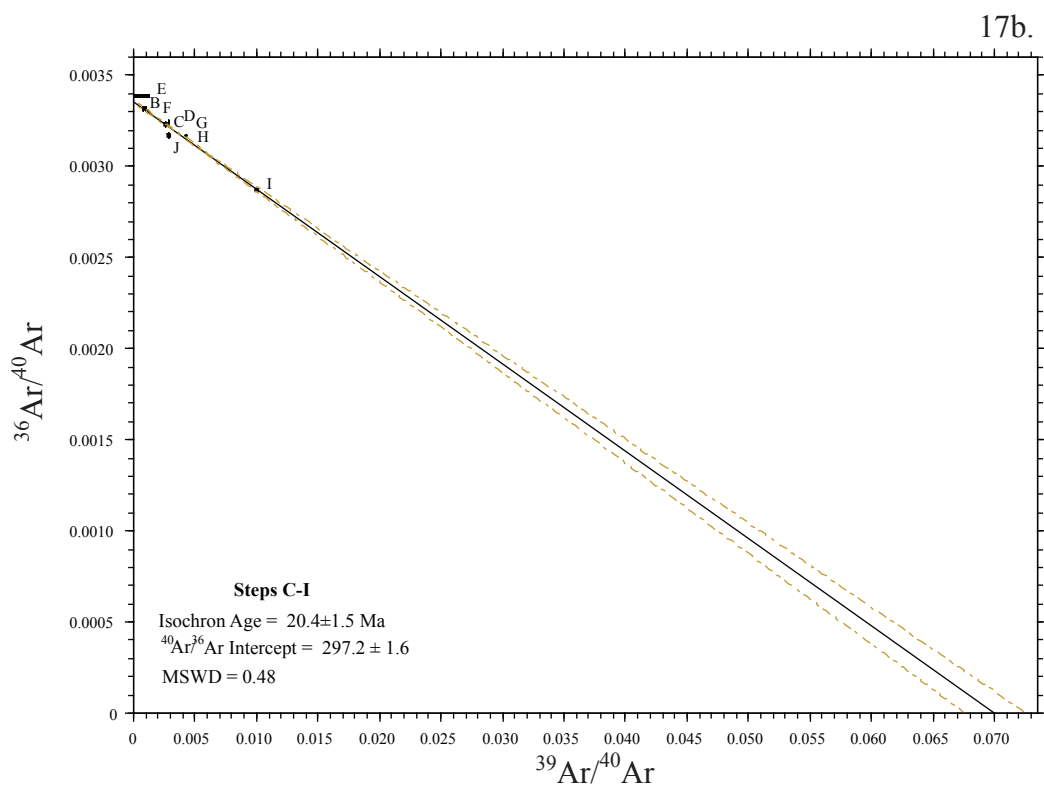

Figure 17. Age spectrum (17a) and isochron (17b) for ER-76 groundmass concentrate.

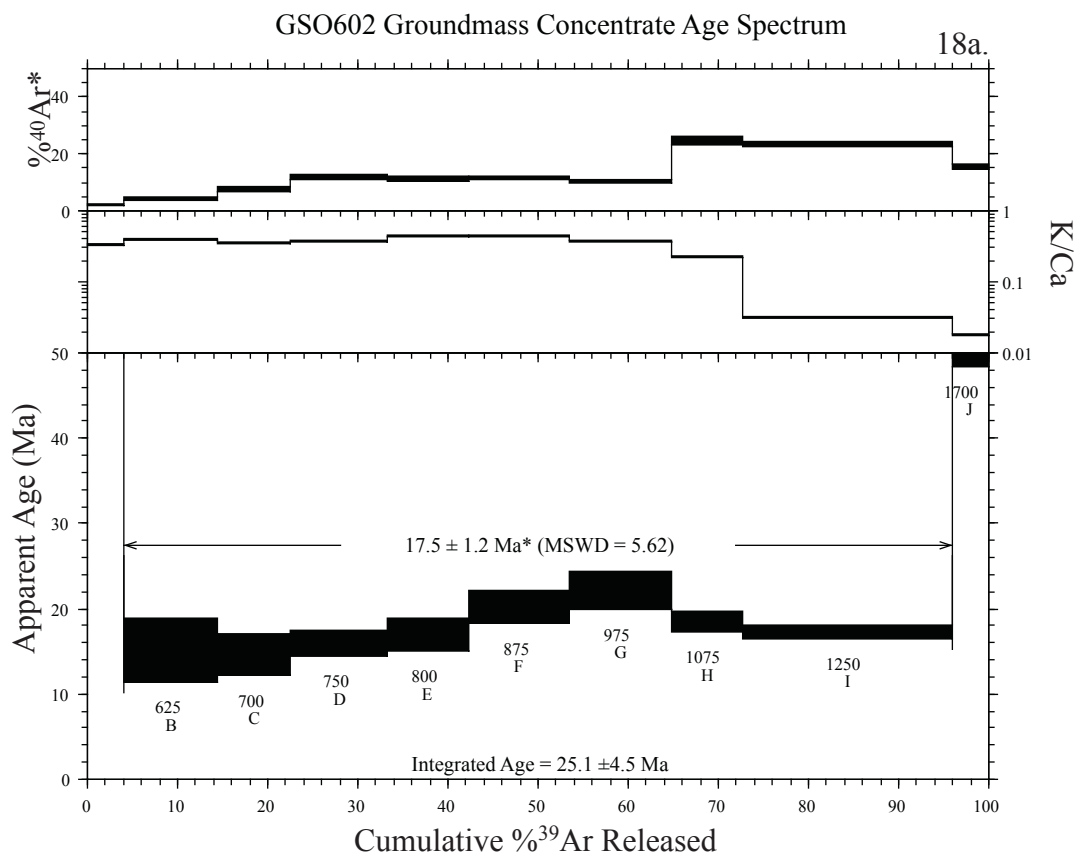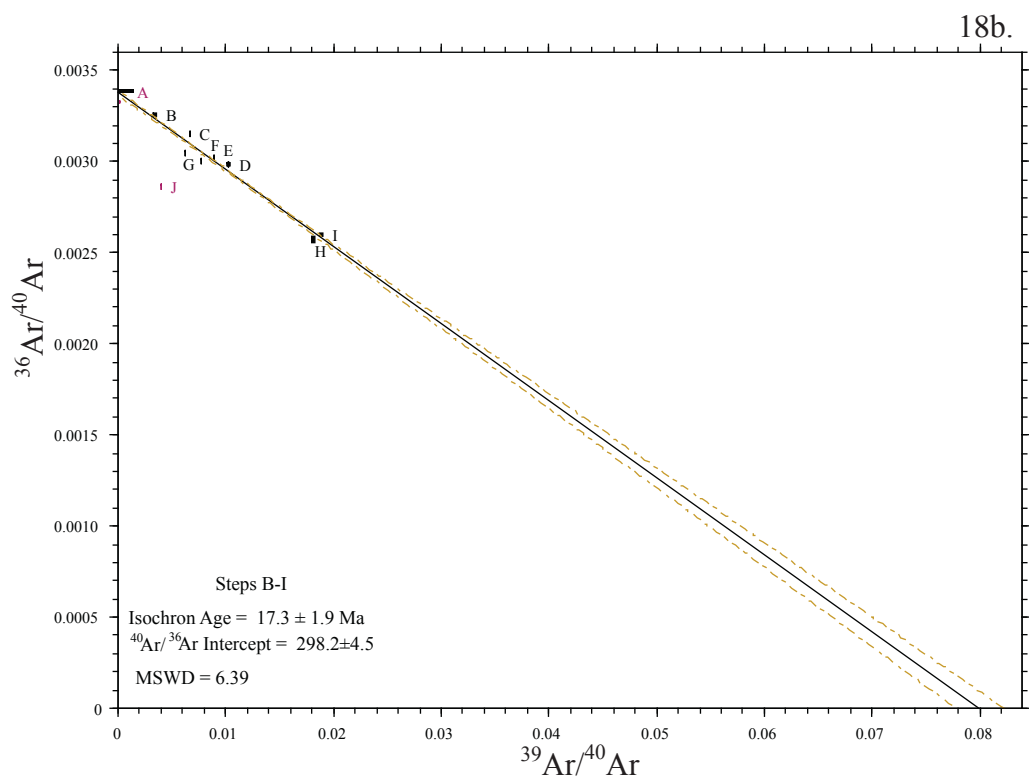

Figure 18. Age spectrum (18a) and isochron (8b) for GSO 602 groundmass concentrate. All errors quoted at 2 sigma.

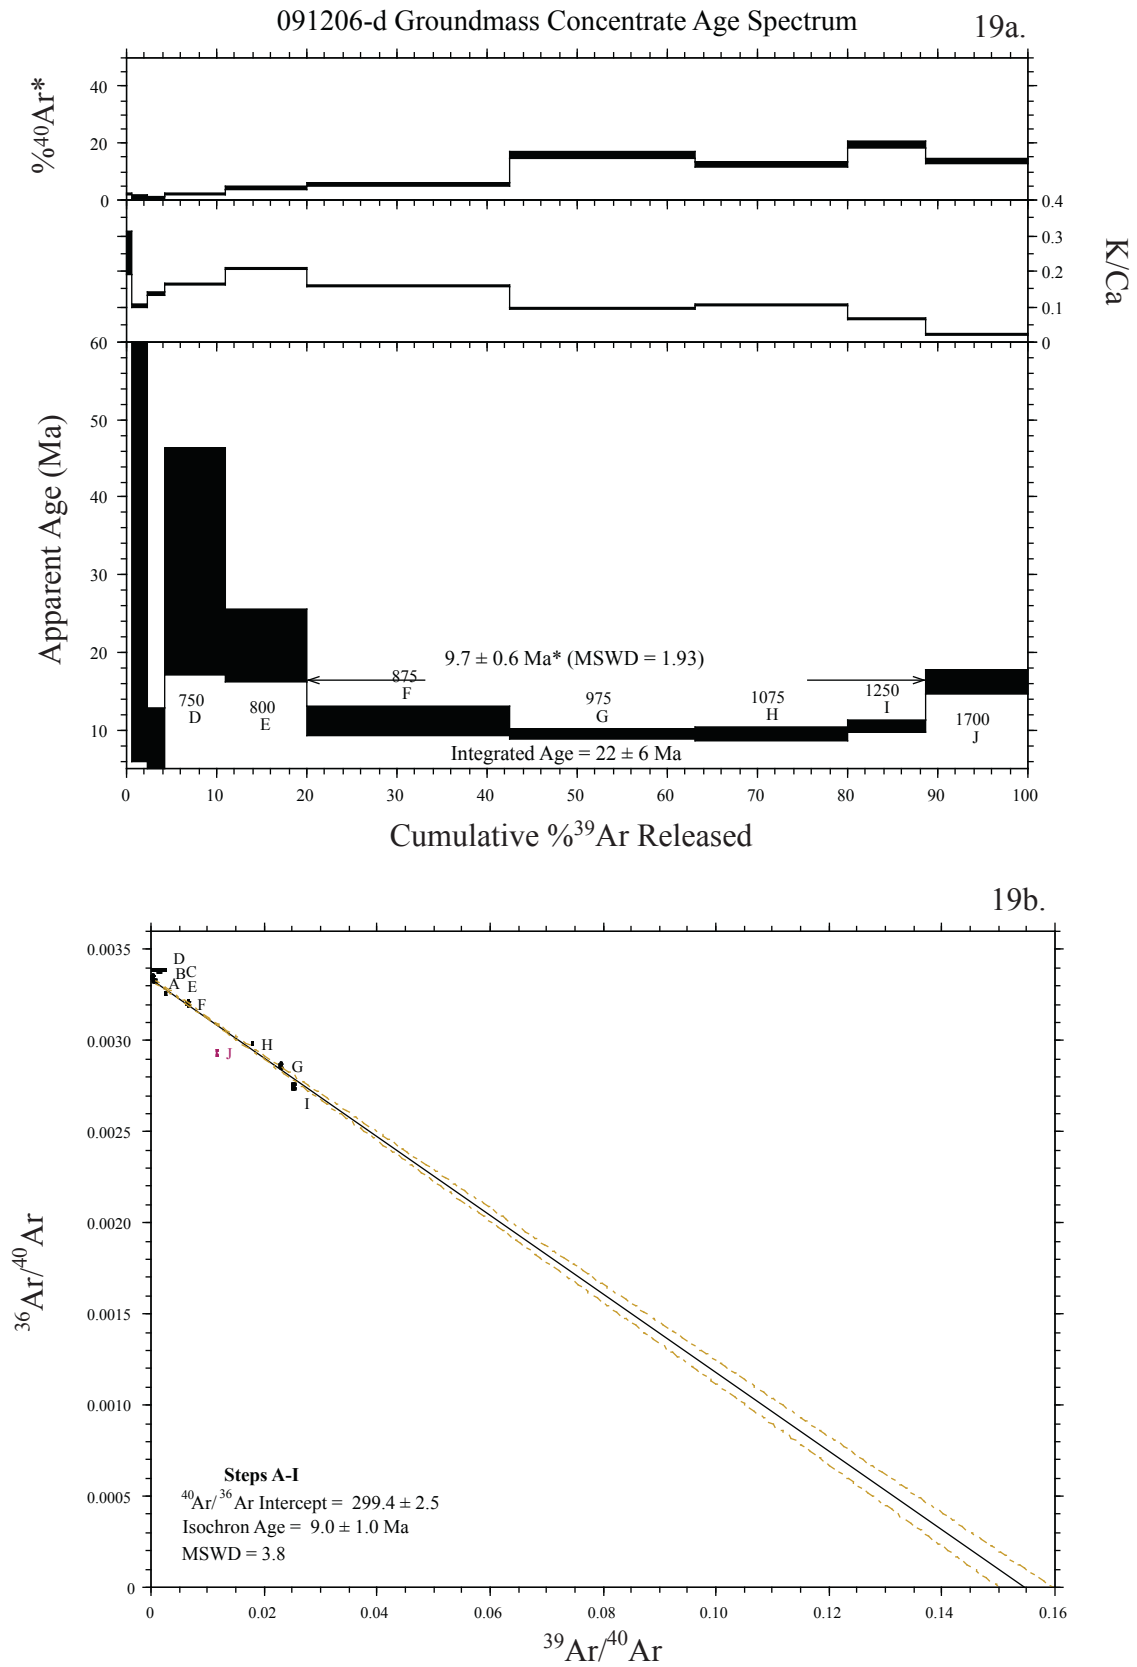

Figure 19. Age spectrum (19a) and isochron (19b) for 091206-d groundmass concentrate.

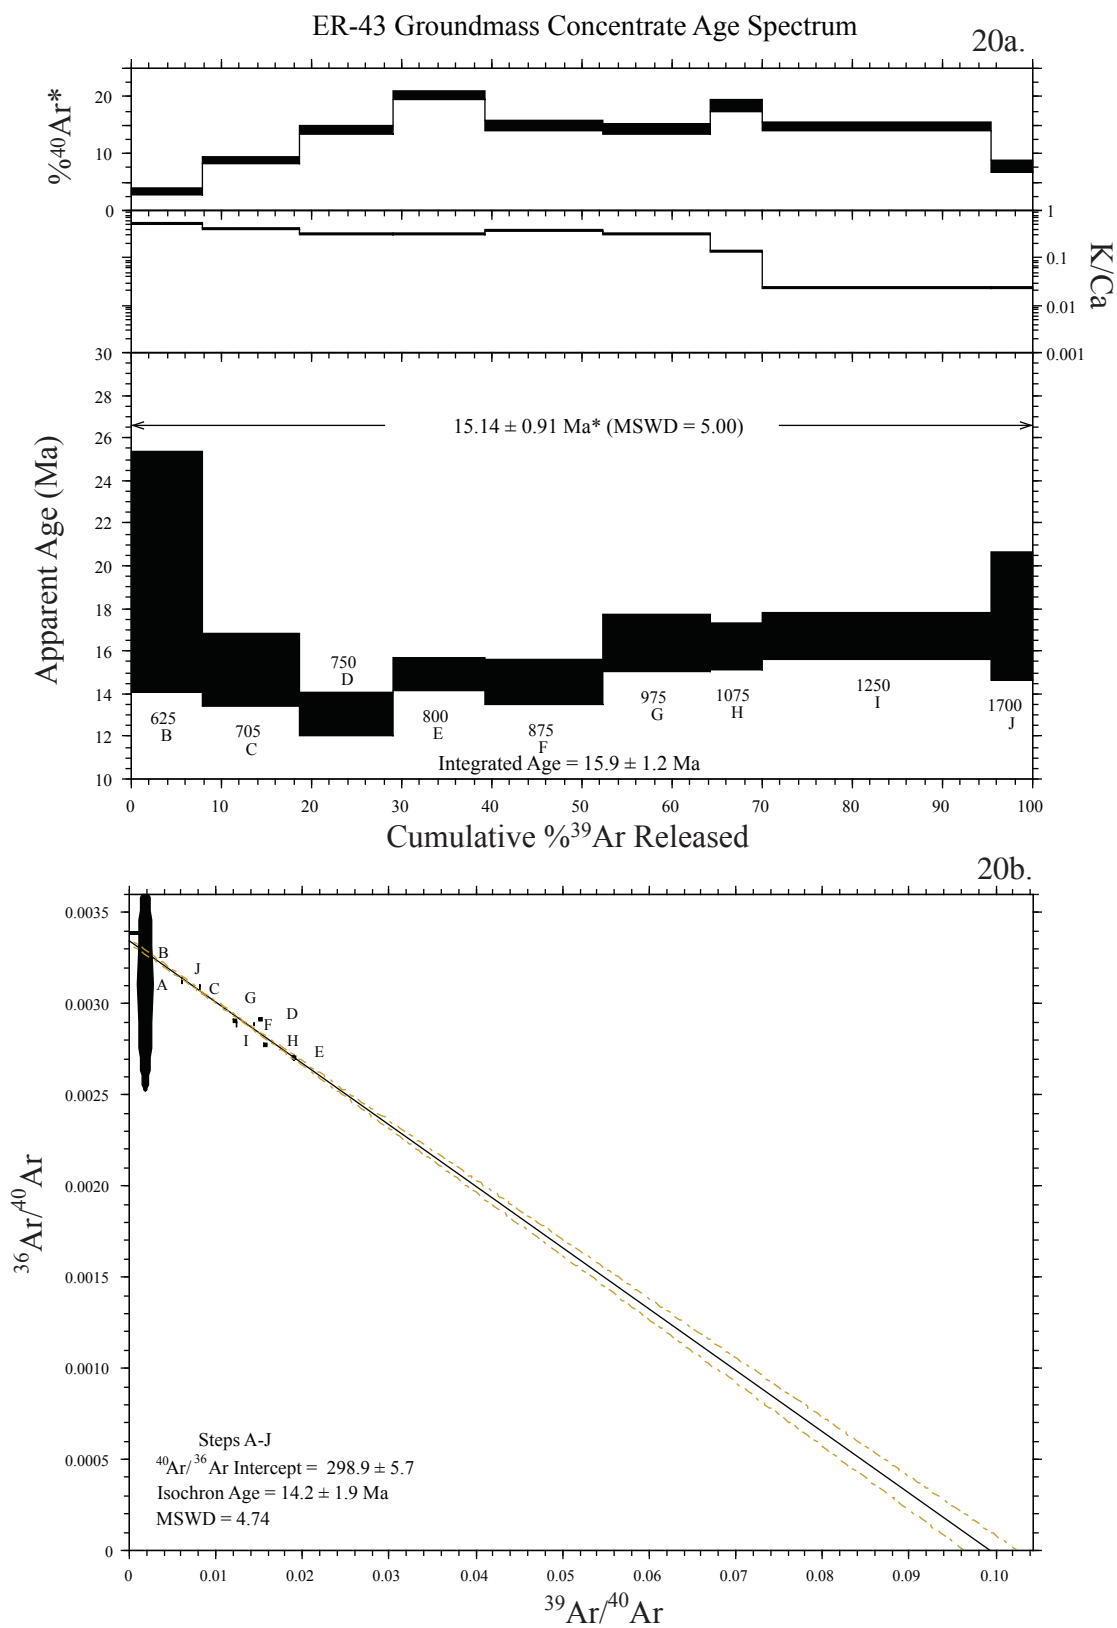

Figure 20. Age spectrum (20a) and isochron (20b) for ER-43-djk groundmass concentrate.

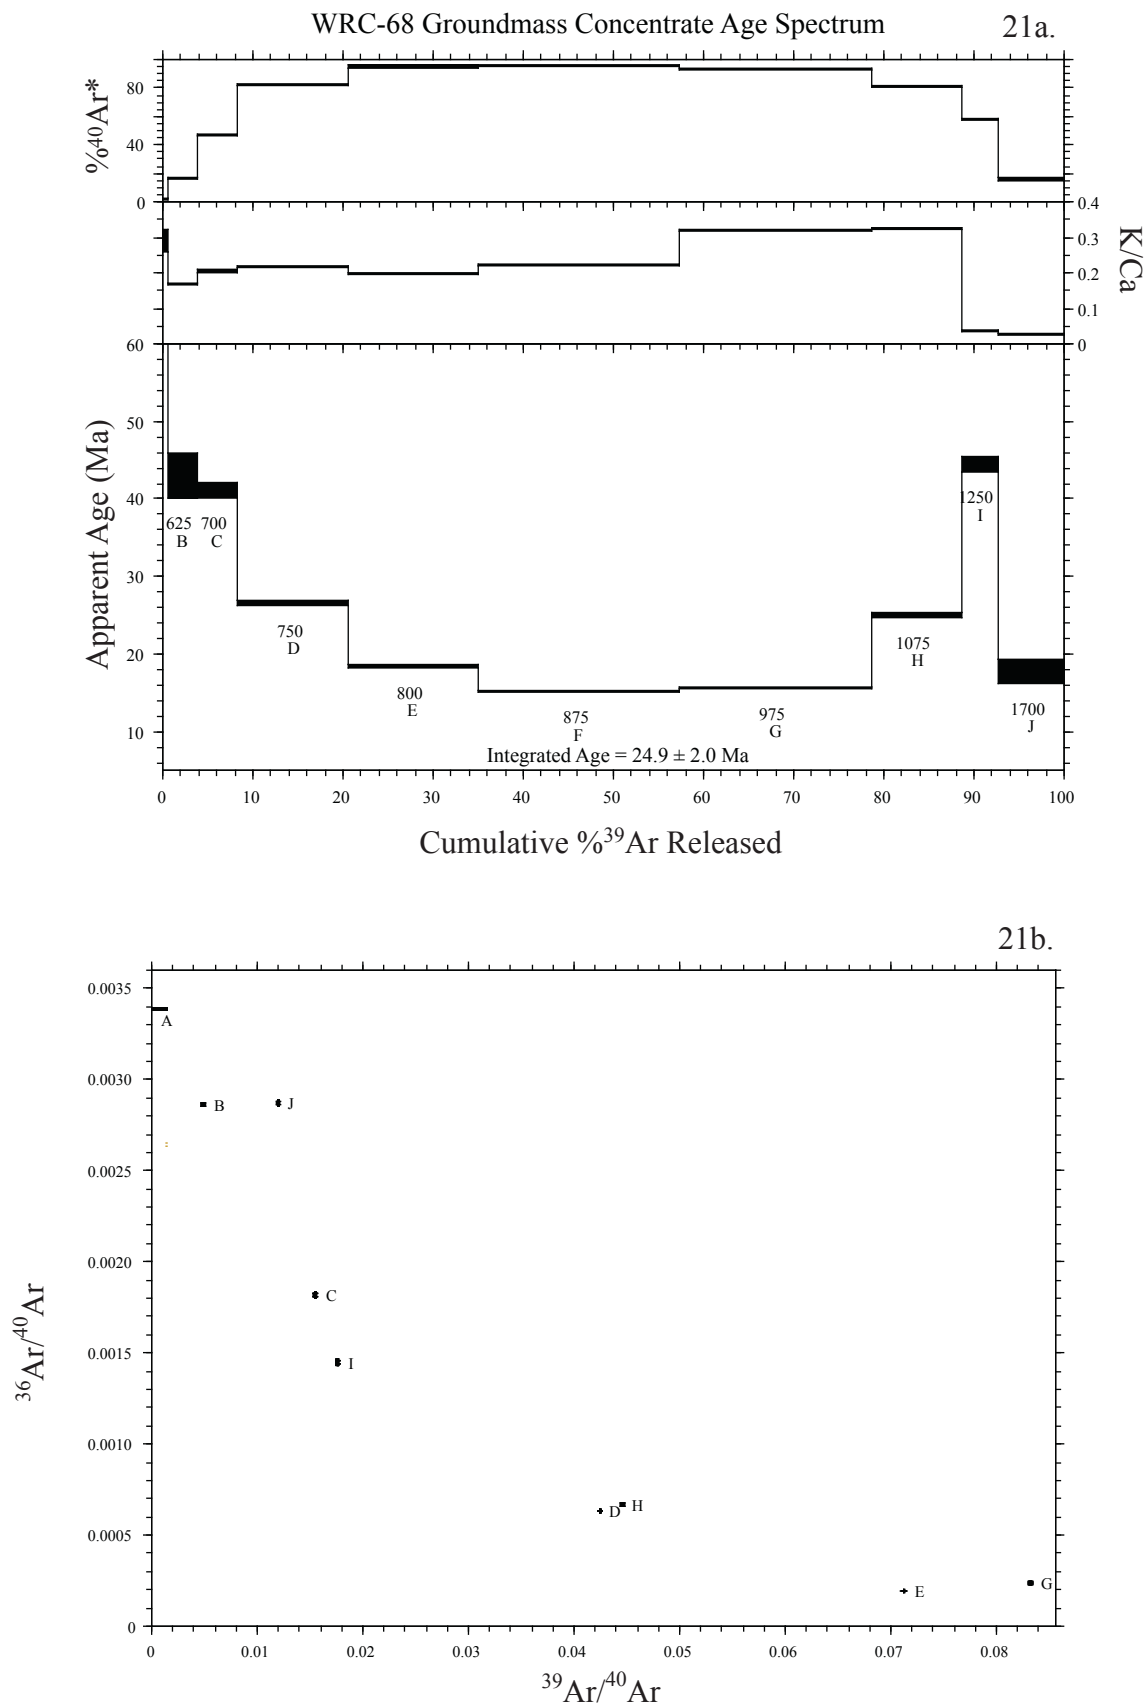

Figure 21. Age spectrum (21a) and isochron (21b) for WRC-68 groundmass concentrate.

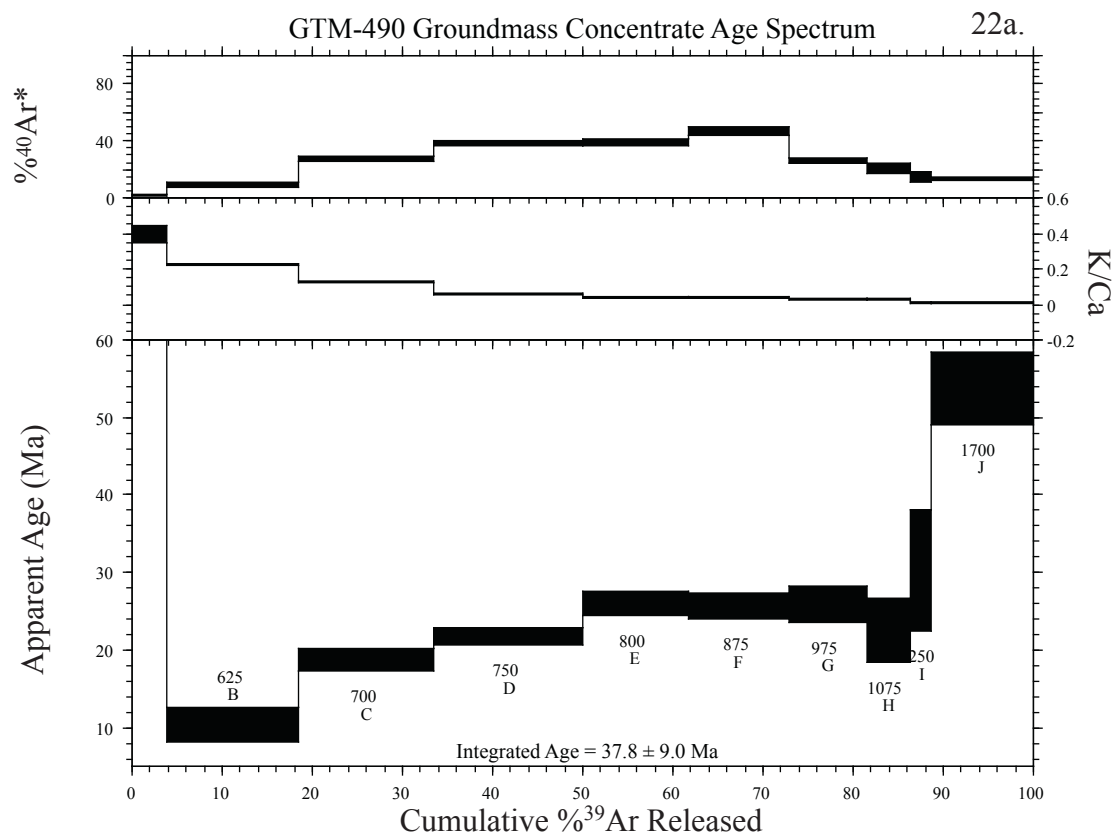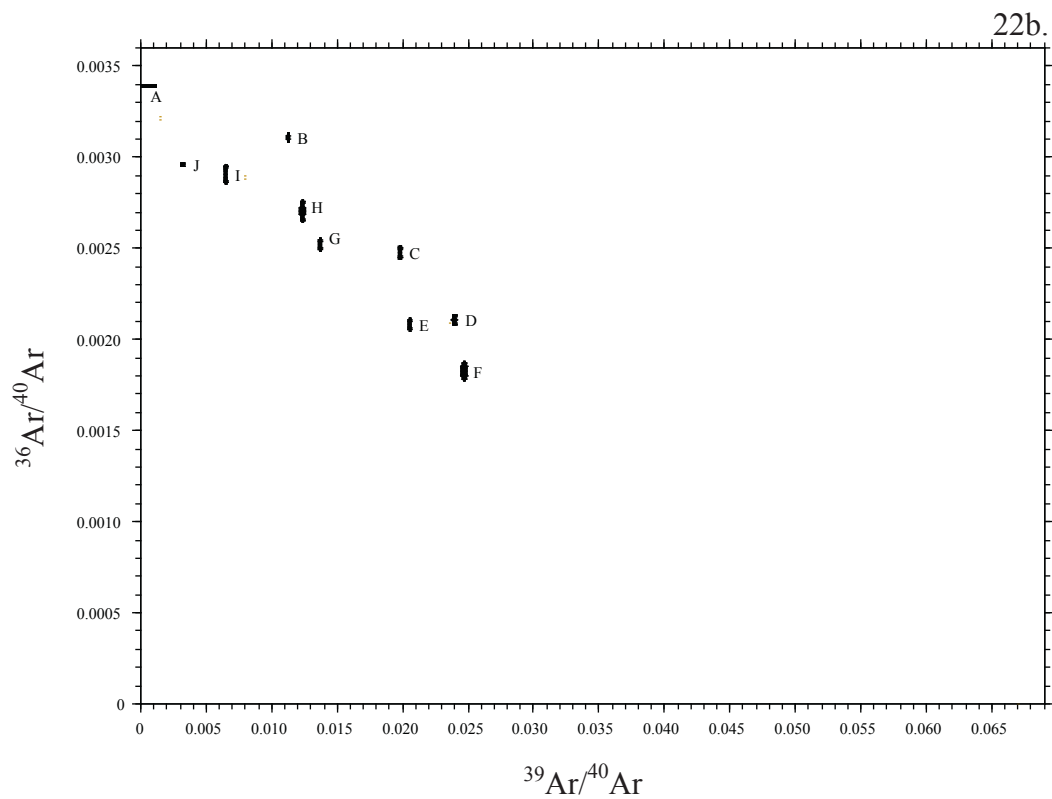

Figure 22. Age spectrum (22a) and isochron (22b) for GTM-490 groundmass concentrate.

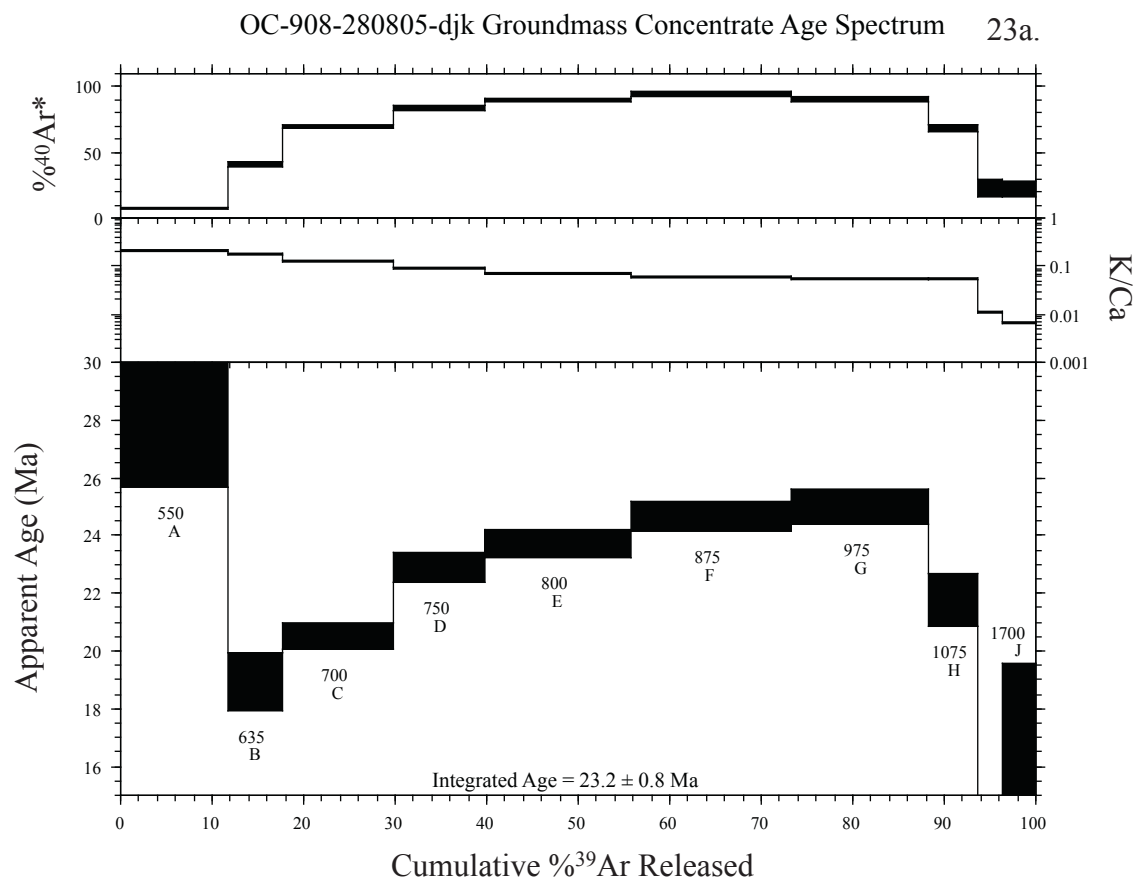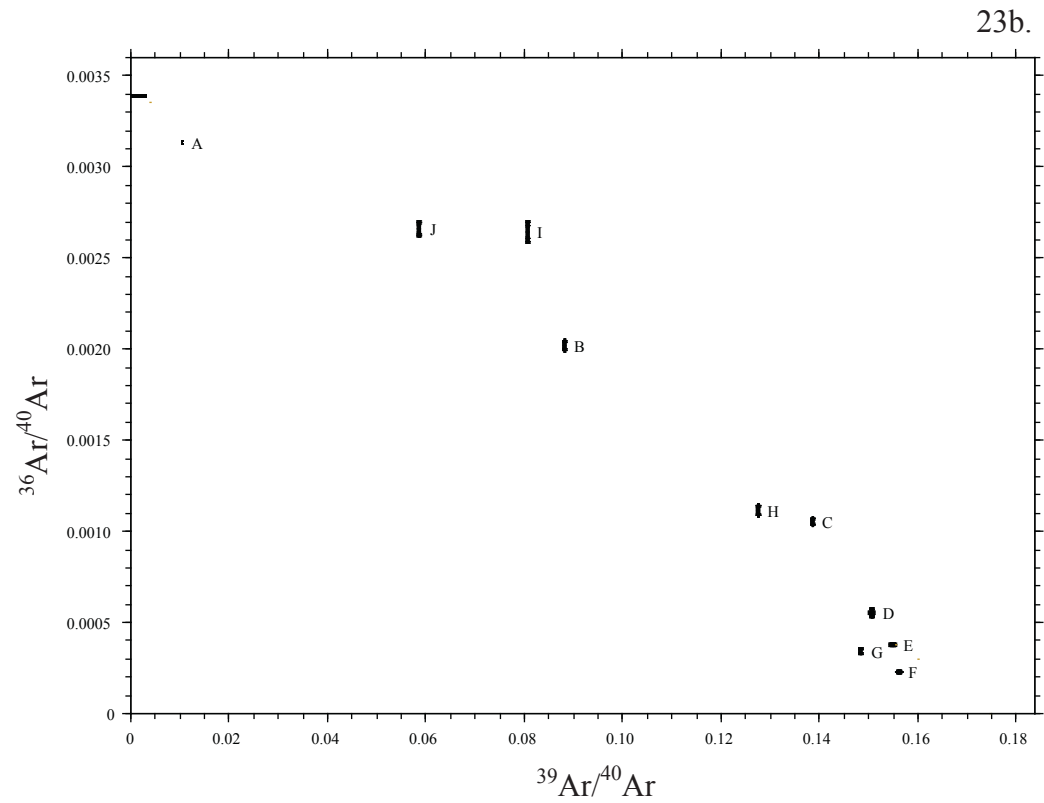

Figure 23. Age spectrum (23a) and isochron (23b) for OC-908-280805-djk groundmass concentrate.

**New Mexico Bureau of Mines and Mineral Resources**

**Procedures of the New Mexico Geochronology Research Laboratory**

**For the Period June 1998 – present**

**Matthew Heizler**

**William C. McIntosh**

**Richard Esser**

**Lisa Peters**

## **$^{40}\text{Ar}/^{39}\text{Ar}$ and K-Ar dating**

Often, large bulk samples (either minerals or whole rocks) are required for K-Ar dating and even small amounts of xenocrystic, authigenic, or other non-ideal behavior can lead to inaccuracy. The K-Ar technique is susceptible to sample inhomogeneity as separate aliquots are required for the potassium and argon determinations. The need to determine absolute quantities (i.e. moles of  $^{40}\text{Ar}^*$  and  $^{40}\text{K}$ ) limits the precision of the K-Ar method to approximately 1% and also, the technique provides limited potential to evaluate underlying assumptions. In the  $^{40}\text{Ar}/^{39}\text{Ar}$  variant of the K-Ar technique, a sample is irradiated with fast neutrons thereby converting  $^{39}\text{K}$  to  $^{39}\text{Ar}$  through a (n,p) reaction. Following irradiation, the sample is either fused or incrementally heated and the gas analyzed in the same manner as in the conventional K-Ar procedure, with one exception, no argon spike need be added.

Some of the advantages of the  $^{40}\text{Ar}/^{39}\text{Ar}$  method over the conventional K-Ar technique are:

1. A single analysis is conducted on one aliquot of sample thereby reducing the sample size and eliminating sample inhomogeneity.
2. Analytical error incurred in determining absolute abundances is reduced by measuring only isotopic ratios. This also eliminates the need to know the exact weight of the sample.
3. The addition of an argon spike is not necessary.
4. The sample does not need to be completely fused, but rather can be incrementally heated. The  $^{40}\text{Ar}/^{39}\text{Ar}$  ratio (age) can be measured for each fraction of argon released and this allows for the generation of an age spectrum.

The age of a sample as determined with the  $^{40}\text{Ar}/^{39}\text{Ar}$  method requires comparison of the measured  $^{40}\text{Ar}/^{39}\text{Ar}$  ratio with that of a standard of known age. Also, several isotopes of other elements (Ca, K, Cl, Ar) produce argon during the irradiation procedure and must be corrected for. Far more in-depth details of the determination of an apparent age via the  $^{40}\text{Ar}/^{39}\text{Ar}$  method are given in Dalrymple et al. (1981) and McDougall and Harrison (1988).

## **Analytical techniques**

### *Sample Preparation and irradiation details*

Mineral separates are obtained in various fashions depending upon the mineral of interest, rock type and grain size. In almost all cases the sample is crushed in a jaw crusher and ground in a disc grinder and then sized. The size fraction used generally corresponds to the largest size possible which will permit obtaining a pure mineral separate. Following sizing, the sample is washed and dried. For plutonic and metamorphic rocks and lavas, crystals are separated using standard heavy liquid, Franz magnetic and hand-picking techniques. For volcanic sanidine and plagioclase, the sized sample is reacted with 15% HF acid to remove glass and/or matrix and then thoroughly washed prior to heavy liquid and magnetic separation. For groundmass concentrates, rock fragments are selected which do not contain any visible phenocrysts.

The NMGRL uses either the Ford reactor at the University of Michigan or the Nuclear Science Center reactor at Texas A&M University. At the Ford reactor, the L67 position is used (unless otherwise noted) and the D-3 position is always used at the Texas A&M reactor. All of the Michigan irradiations are carried out underwater without any shielding for thermal neutrons, whereas the Texas irradiations are in a dry location which is shielded with B and Cd. Depending upon the reactor used, the mineral separates are loaded into either holes drilled into Al discs or into 6 mm I.D. quartz tubes. Various Al discs are used. For Michigan, either six hole or twelve hole, 1 cm diameter discs are used and all holes are of equal size. Samples are placed in the 0, 120 and 240° locations and standards in the 60, 180 and 300° locations for the six hole disc. For the twelve hole disc, samples are located at 30, 60, 120, 150, 210, 240, 300, and 330° and standards at 0, 90, 180 and 270 degrees. If samples are loaded into the quartz tubes, they are wrapped in Cu foil with standards interleaved at ~0.5 cm intervals. For Texas, 2.4 cm diameter discs contain either sixteen or six sample holes with smaller holes used to hold the standards. For the six hole disc, sample locations are 30, 90, 150, 210, 270 and 330° and standards are at 0, 60, 120, 180, 240 and 300°. Samples are located at 18, 36, 54, 72, 108, 126, 144, 162, 198, 216, 234, 252, 288, 306, 324, 342 degrees and standards at 0, 90, 180 and 270 degrees in the sixteen hole disc. Following sample loading into the discs, the discs are stacked, screwed together and sealed

in vacuo in either quartz (Michigan) or Pyrex (Texas) tubes.

### *Extraction Line and Mass Spectrometer details*

The NMGRL argon extraction line has both a double vacuum Mo resistance furnace and a CO<sub>2</sub> laser to heat samples. The Mo furnace crucible is heated with a W heating element and the temperature is monitored with a W-Re thermocouple placed in a hole drilled into the bottom of the crucible. A one inch long Mo liner is placed in the bottom of the crucible to collect the melted samples. The furnace temperature is calibrated by either/or melting Cu foil or with an additional thermocouple inserted in the top of the furnace down to the liner. The CO<sub>2</sub> laser is a Synrad 10W laser equipped with a He-Ne pointing laser. The laser chamber is constructed from a 3 3/8" stainless steel conflat and the window material is ZnS. The extraction line is a two stage design. The first stage is equipped with a SAES GP-50 getter, whereas the second stage houses two SAES GP-50 getters and a tungsten filament. The first stage getter is operated at 450°C as is one of the second stage getters. The other second stage getter is operated at room temperature and the tungsten filament is operated at ~2000°C. Gases evolved from samples heated in the furnace are reacted with the first stage getter during heating. Following heating, the gas is expanded into the second stage for two minutes and then isolated from the first stage. During second stage cleaning, the first stage and furnace are pumped out. After gettering in the second stage, the gas is expanded into the mass spectrometer. Gases evolved from samples heated in the laser are expanded through a cold finger operated at -140°C and directly into the second stage. Following cleanup, the gas in the second stage and laser chamber is expanded into the mass spectrometer for analysis.

The NMGRL employs a MAP-215-50 mass spectrometer which is operated in static mode. The mass spectrometer is operated with a resolution ranging between 450 to 600 at mass 40 and isotopes are detected on a Johnston electron multiplier operated at ~2.1 kV with an overall gain of about 10,000 over the Faraday collector. Final isotopic intensities are determined by linear regression to time zero of the peak height versus time following gas introduction for each mass. Each mass intensity is corrected for mass spectrometer baseline and background and the extraction system blank.

Blanks for the furnace are generally determined at the beginning of a run while the furnace is cold and then between heating steps while the furnace is cooling. Typically, a blank is

run every three to six heating steps. Periodic furnace hot blank analysis reveals that the cold blank is equivalent to the hot blank for temperatures less than about 1300°C. Laser system blanks are generally determined between every four analyses. Mass discrimination is measured using atmospheric argon which has been dried using a Ti-sublimation pump. Typically, 10 to 15 replicate air analyses are measured to determine a mean mass discrimination value. Air pipette analyses are generally conducted 2-3 times per month, but more often when samples sensitive to the mass discrimination value are analyzed. Correction factors for interfering nuclear reactions on K and Ca are determined using K-glass and CaF<sub>2</sub>, respectively. Typically, 3-5 individual pieces of the salt or glass are fused with the CO<sub>2</sub> laser and the correction factors are calculated from the weighted mean of the individual determinations.

### *Data acquisition, presentation and age calculation*

Samples are either step-heated or fused in a single increment (total fusion). Bulk samples are often step-heated and the data are generally displayed on an age spectrum or isochron diagram. Single crystals are often analyzed by the total fusion method and the results are typically displayed on probability distribution diagrams or isochron diagrams.

#### The Age Spectrum Diagram

Age spectra plot apparent age of each incrementally heated gas fraction versus the cumulative % <sup>39</sup>Ar<sub>K</sub> released, with steps increasing in temperature from left to right. Each apparent age is calculated assuming that the trapped argon (argon not produced by *in situ* decay of <sup>40</sup>K) has the modern day atmospheric <sup>40</sup>Ar/<sup>36</sup>Ar value of 295.5. Additional parameters for each heating step are often plotted versus the cumulative % <sup>39</sup>Ar<sub>K</sub> released. These auxiliary parameters can aid age spectra interpretation and may include radiogenic yield (percent of <sup>40</sup>Ar which is not atmospheric), K/Ca (determined from measured Ca-derived <sup>37</sup>Ar and K-derived <sup>39</sup>Ar) and/or K/Cl (determined from measured Cl-derived <sup>38</sup>Ar and K-derived <sup>39</sup>Ar). Incremental heating analysis is often effective at revealing complex argon systematics related to excess argon, alteration, contamination, <sup>39</sup>Ar recoil, argon loss, etc. Often low-temperature heating steps have low radiogenic yields and apparent ages with relatively high errors due mainly to

loosely held, non-radiogenic argon residing on grain surfaces or along grain boundaries. An entirely or partially flat spectrum, in which apparent ages are the same within analytical error, may indicate that the sample is homogeneous with respect to K and Ar and has had a simple thermal and geological history. A drawback to the age spectrum technique is encountered when hydrous minerals such as micas and amphiboles are analyzed. These minerals are not stable in the ultra-high vacuum extraction system and thus step-heating can homogenize important details of the true  $^{40}\text{Ar}$  distribution. In other words, a flat age spectrum may result even if a hydrous sample has a complex argon distribution.

### The Isochron Diagram

Argon data can be plotted on isotope correlation diagrams to help assess the isotopic composition of Ar trapped at the time of argon closure, thereby testing the assumption that trapped argon isotopes have the composition of modern atmosphere which is implicit in age spectra. To construct an “inverse isochron” the  $^{36}\text{Ar}/^{40}\text{Ar}$  ratio is plotted versus the  $^{39}\text{Ar}/^{40}\text{Ar}$  ratio. A best fit line can be calculated for the data array which yields the value for the trapped argon (Y-axis intercept) and the  $^{40}\text{Ar}^*/^{39}\text{Ar}_K$  value (age) from the X-axis intercept. Isochron analysis is most useful for step-heated or total fusion data which have a significant spread in radiogenic yield. For young or low K samples, the calculated apparent age can be very sensitive to the composition of the trapped argon and therefore isochron analysis should be performed routinely on these samples (cf. Heizler and Harrison, 1988). For very old (>Mesozoic) samples or relatively old sanidines (>mid-Cenozoic) the data are often highly radiogenic and cluster near the X-axis thereby making isochron analysis of little value.

## The Probability Distribution Diagram

The probability distribution diagram, which is sometimes referred to as an ideogram, is a plot of apparent age versus the summation of the normal distribution of each individual analysis (Deino and Potts, 1992). This diagram is most effective at displaying single crystal laser fusion data to assess the distribution of the population. The K/Ca, radiogenic yield, and the moles of  $^{39}\text{Ar}$  for each analysis are also often displayed for each sample as this allows for visual ease in identifying apparent age correlations between, for instance, plagioclase contamination, signal size and/or radiogenic concentrations. The error ( $1\sigma$ ) for each age analysis is generally shown by the horizontal lines in the moles of  $^{39}\text{Ar}$  section. Solid symbols represent the analyses used for the weighted mean age calculation and the generation of the solid line on the ideogram, whereas open symbols represent data omitted from the age calculation. If shown, a dashed line represents the probability distribution of all of the displayed data. The diagram is most effective for displaying the form of the age distribution (i.e. gaussian, skewed, etc.) and for identifying xenocrystic or other grains which fall outside of the main population.

## Error Calculations

For step-heated samples, a plateau for the age spectrum is defined by the steps indicated. The plateau age is calculated by weighting each step on the plateau by the inverse of the variance and the error is calculated by either the method of Samson and Alexander (1987) or Taylor (1982). A mean sum weighted deviates (MSWD) value is determined by dividing the Chi-squared value by  $n-1$  degrees of freedom for the plateau ages. If the MSWD value is outside the 95% confidence window (cf. Mahon, 1996; Table 1), the plateau or preferred age error is multiplied by the square root of the MSWD.

For single crystal fusion data, a weighted mean is calculated using the inverse of the variance to weight each age determination (Taylor, 1982). Errors are calculated as described for the plateau ages above.

Isochron ages,  $^{40}\text{Ar}/^{36}\text{Ar}_i$  values and MSWD values are calculated from the regression results obtained by the York (1969) method.

## References cited

- Dalrymple, G.B., Alexander, E.C., Jr., Lanphere, M.A., and Kraker, G.P., 1981. Irradiation of samples for  $^{40}\text{Ar}/^{39}\text{Ar}$  dating using the Geological Survey TRIGA reactor. U.S.G.S., Prof. Paper, 1176.
- Deino, A., and Potts, R., 1990. Single-Crystal  $^{40}\text{Ar}/^{39}\text{Ar}$  dating of the Olorgesailie Formation, Southern Kenya Rift, J. Geophys. Res., 95, 8453-8470.
- Deino, A., and Potts, R., 1992. Age-probability spectra from examination of single-crystal  $^{40}\text{Ar}/^{39}\text{Ar}$  dating results: Examples from Olorgesailie, Southern Kenya Rift, Quat. International, 13/14, 47-53.
- Fleck, R.J., Sutter, J.F., and Elliot, D.H., 1977. Interpretation of discordant  $^{40}\text{Ar}/^{39}\text{Ar}$  age-spectra of Mesozoic tholeiites from Antarctica, Geochim. Cosmochim. Acta, 41, 15-32.
- Heizler, M. T., and Harrison, T. M., 1988. Multiple trapped argon components revealed by  $^{40}\text{Ar}/^{39}\text{Ar}$  analysis, Geochim. Cosmochim. Acta, 52, 295-1303.
- Mahon, K.I., 1996. The New “York” regression: Application of an improved statistical method to geochemistry, International Geology Review, 38, 293-303.
- McDougall, I., and Harrison, T.M., 1988. Geochronology and thermochronology by the  $^{40}\text{Ar}$ - $^{39}\text{Ar}$  method. Oxford University Press.
- Samson, S.D., and, Alexander, E.C., Jr., 1987. Calibration of the interlaboratory  $^{40}\text{Ar}/^{39}\text{Ar}$  dating standard, Mmhb-1, Chem. Geol., 66, 27-34.
- Steiger, R.H., and Jäger, E., 1977. Subcommission on geochronology: Convention on the use of decay constants in geo- and cosmochronology. Earth and Planet. Sci. Lett., 36, 359-362.
- Taylor, J.R., 1982. An Introduction to Error Analysis: The Study of Uncertainties in Physical Measurements,. Univ. Sci. Books, Mill Valley, Calif., 270 p.
- York, D., 1969. Least squares fitting of a straight line with correlated errors, Earth and Planet. Sci. Lett., 5, 320-324.

# $^{40}\text{Ar}/^{39}\text{Ar}$ Geochronology Results

By

Lisa Peters

JUNE 29, 2010

Prepared for

Dan Koning  
NMBMMR/ NM Tech  
Socorro, Nm 87801

NEW MEXICO  
GEOCHRONOLOGY RESEARCH LABORATORY  
(NMGRL)

CO-DIRECTORS

DR. MATTHEW T. HEIZLER

DR. WILLIAM C. MCINTOSH

LABORATORY TECHNICIAN

LISA PETERS

Internal Report #: NMGRL-IR-633

## Introduction

Two tephra samples were submitted by Dan Koning as part of the STATEMAP program. Sanidine was separated from VG-63-250907-djk and Set-26-230807-djk. The age data is summarized below in Table 1.

**Table 1. Brief summary of results.**

| Sample            | Phase    | Age $\pm$ 2s (Ma)   | Comments      |
|-------------------|----------|---------------------|---------------|
| VG-63-250907-djk  | Sanidine | 21.12 $\pm$ 0.06 Ma | near gaussian |
| Set-26-230807-djk | Sanidine | 25.52 $\pm$ 0.07 Ma | near gaussian |

## <sup>40</sup>Ar/<sup>39</sup>Ar Analytical Methods and Results

Samples were prepared by crushing, sieving and then treating with dilute HF acid. Sanidine was then separated with Franz magnetic separator, heavy liquids and hand-picking. The mineral separates and monitors (Fish Canyon tuff sanidine, 28.02, Renne et al., 1998) were loaded into aluminum discs and irradiated for 7 hours at the USGS TRIGA, Denver, Colorado.

The monitors and samples were analyzed by the single crystal laser fusion method. Abbreviated analytical methods for the dated samples are given in Tables 1 and 2, complete data in Table 3 and details of the overall operation of the New Mexico Geochronology Research Laboratory is provided in the Appendix.

The sanidine from both samples yield near Gaussian populations (Figures 1 and 2). All fifteen analyzed crystals were used to calculate the weighted mean age of 21.12 $\pm$ 0.06 Ma for VG-63-250907-djk. Three plagioclase crystals were eliminated from the data set before a weighted mean age of 25.52 $\pm$ 0.07 Ma was calculated Set-26-230807-djk using all the sanidine crystals.

**Discussion**

We assign the weighted mean ages calculated for samples VG-63-250907-djk and SET-26-230807-djk (21.120.06 MA and 25.52±0.07 Ma) as our preferred ages for these samples and the eruption ages of the units from which they were sampled.

## References Cited

- Renne, P.R., C.C. Swisher, A.L. Deino, D.B. Karner, T.L. Owens and D.J. Depaolo, 1998, Intercalibration of standards: absolute ages and uncertainties in  $^{40}\text{Ar}/^{39}\text{Ar}$  dating. *Chem. Geol.*, v. 145, p.117-152.
- Steiger, R.H., and Jäger, E., 1977. Subcommittee on geochronology: Convention on the use of decay constants in geo- and cosmochemistry. *Earth and Planet. Sci. Lett.*, 36, 359-362.
- Taylor, J.R., 1982. *An Introduction to Error Analysis: The Study of Uncertainties in Physical Measurements*, Univ. Sci. Books, Mill Valley, Calif., 270 p.

**Table 1. Summary of  $^{40}\text{Ar}/^{39}\text{Ar}$  results and analytical methods**

| Sample            | Lab # | Irradiation | mineral  | age<br>analysis    | crystals | Age   | $\pm 2\sigma$ | MSWD |
|-------------------|-------|-------------|----------|--------------------|----------|-------|---------------|------|
| VG-63-250907-djk  | 59157 | 226         | sanidine | laser total fusion | 15       | 21.12 | 0.06          | 2.97 |
| Set-26-230807-djk | 59156 | 226         | sanidine | laser total fusion | 12       | 25.52 | 0.07          | 4.04 |

**Sample preparation and irradiation:**

Minerals separated with standard heavy liquid, Franz Magnetic and hand-picking techniques.

Samples in NM-226 irradiated in a machined Aluminum tray for 7 hours in C.T. position, USGS TRIGA, Denver, Colorado.

Neutron flux monitor Fish Canyon Tuff sanidine (FC-2). Assigned age = 28.02 Ma (Renne et al., 1998).

**Instrumentation:**

Analyses performed on a Mass Analyzer Products 215-50 mass spectrometer on line with automated all-metal extraction system.

Flux monitors and sanidine fused by a 50 watt Synrad  $\text{CO}_2$  laser.

**Analytical parameters:**

Electron multiplier sensitivity averaged  $4.70\text{e-}17$  moles/pA for laser analyses.

Total system blank and background averaged 383, 1.5 0.69, 4.1,  $8.4 \times 10^{-18}$  moles at masses 40, 39, 38, 37 and 36, respectively for the laser analyses.

J-factors determined by  $\text{CO}_2$  laser-fusion of 5 single crystals from each of 6 radial positions around the irradiation tray.

Decay constants and isotopic abundances after Steiger and Jäger (1977).

---

| ID                                                                                                                        | $^{40}\text{Ar}/^{39}\text{Ar}$ | $^{37}\text{Ar}/^{39}\text{Ar}$ | $^{36}\text{Ar}/^{39}\text{Ar}$<br>( $\times 10^{-3}$ ) | $^{39}\text{Ar}_K$<br>( $\times 10^{-15}$ mol) | K/Ca | $^{40}\text{Ar}^*$<br>(%) | Age<br>(Ma) | $\pm 1\sigma$<br>(Ma) |
|---------------------------------------------------------------------------------------------------------------------------|---------------------------------|---------------------------------|---------------------------------------------------------|------------------------------------------------|------|---------------------------|-------------|-----------------------|
| <b>Set-26-230807-djk</b> , Sanidine, J=0.0015776 $\pm$ 0.06%, D=1.005 $\pm$ 0.001, NM-226E, Lab#=#59156                   |                                 |                                 |                                                         |                                                |      |                           |             |                       |
| 11A                                                                                                                       | 9.233                           | 0.0200                          | 1.092                                                   | 5.284                                          | 25.5 | 96.5                      | 25.16       | 0.10                  |
| 08A                                                                                                                       | 9.417                           | 0.0136                          | 1.532                                                   | 7.563                                          | 37.5 | 95.2                      | 25.31       | 0.07                  |
| 09A                                                                                                                       | 9.164                           | 0.0165                          | 0.5403                                                  | 6.310                                          | 31.0 | 98.3                      | 25.42       | 0.06                  |
| 07A                                                                                                                       | 9.110                           | 0.0137                          | 0.3501                                                  | 13.692                                         | 37.3 | 98.9                      | 25.43       | 0.05                  |
| 05A                                                                                                                       | 9.150                           | 0.0115                          | 0.4129                                                  | 12.331                                         | 44.5 | 98.7                      | 25.49       | 0.05                  |
| 06A                                                                                                                       | 9.344                           | 0.0113                          | 1.046                                                   | 6.095                                          | 45.2 | 96.7                      | 25.51       | 0.08                  |
| 02A                                                                                                                       | 9.175                           | 0.0126                          | 0.4586                                                  | 12.487                                         | 40.6 | 98.5                      | 25.52       | 0.05                  |
| 13A                                                                                                                       | 9.925                           | 0.0164                          | 2.984                                                   | 19.225                                         | 31.1 | 91.1                      | 25.53       | 0.06                  |
| 01A                                                                                                                       | 9.100                           | 0.0155                          | 0.1301                                                  | 16.094                                         | 32.8 | 99.6                      | 25.58       | 0.05                  |
| 15A                                                                                                                       | 9.122                           | 0.0131                          | 0.1775                                                  | 10.144                                         | 39.1 | 99.4                      | 25.61       | 0.05                  |
| 04A                                                                                                                       | 9.171                           | 0.0091                          | 0.3112                                                  | 14.727                                         | 56.2 | 99.0                      | 25.63       | 0.05                  |
| 03A                                                                                                                       | 9.148                           | 0.0128                          | 0.2079                                                  | 16.247                                         | 39.8 | 99.3                      | 25.65       | 0.05                  |
| <b>Mean age <math>\pm 2\sigma</math></b>                                                                                  | n=12                            | MSWD=4.04                       |                                                         | 38.4 $\pm$ 16.2                                |      |                           | 25.52       | 0.07                  |
| <b>VG-63-250907-djk</b> , Sanidine, J=0.001577 $\pm$ 0.06%, D=1.005 $\pm$ 0.001, NM-226E, Lab#=#59157                     |                                 |                                 |                                                         |                                                |      |                           |             |                       |
| 01A                                                                                                                       | 9.496                           | 0.0089                          | 7.089                                                   | 7.846                                          | 57.4 | 77.9                      | 20.91       | 0.09                  |
| 16A                                                                                                                       | 7.664                           | 0.0088                          | 0.7811                                                  | 14.164                                         | 57.8 | 97.0                      | 21.00       | 0.05                  |
| 06A                                                                                                                       | 10.91                           | 0.0221                          | 11.73                                                   | 9.272                                          | 23.0 | 68.2                      | 21.03       | 0.11                  |
| 11A                                                                                                                       | 7.522                           | 0.0076                          | 0.2556                                                  | 12.525                                         | 67.4 | 99.0                      | 21.04       | 0.05                  |
| 09A                                                                                                                       | 7.851                           | 0.0107                          | 1.351                                                   | 7.355                                          | 47.6 | 94.9                      | 21.05       | 0.07                  |
| 04A                                                                                                                       | 7.625                           | 0.0094                          | 0.5547                                                  | 9.955                                          | 54.2 | 97.9                      | 21.08       | 0.05                  |
| 05A                                                                                                                       | 7.608                           | 0.0073                          | 0.4749                                                  | 5.777                                          | 69.6 | 98.2                      | 21.10       | 0.07                  |
| 12A                                                                                                                       | 7.676                           | 0.0080                          | 0.7008                                                  | 12.223                                         | 63.8 | 97.3                      | 21.10       | 0.05                  |
| 14A                                                                                                                       | 7.643                           | 0.0132                          | 0.5718                                                  | 13.374                                         | 38.8 | 97.8                      | 21.12       | 0.05                  |
| 10A                                                                                                                       | 7.672                           | 0.0103                          | 0.6392                                                  | 14.916                                         | 49.5 | 97.5                      | 21.14       | 0.05                  |
| 13A                                                                                                                       | 7.639                           | 0.0095                          | 0.4949                                                  | 9.268                                          | 53.9 | 98.1                      | 21.17       | 0.06                  |
| 08A                                                                                                                       | 7.728                           | 0.0073                          | 0.7728                                                  | 4.628                                          | 69.8 | 97.0                      | 21.18       | 0.08                  |
| 02A                                                                                                                       | 7.938                           | 0.0256                          | 1.485                                                   | 4.912                                          | 19.9 | 94.5                      | 21.19       | 0.09                  |
| 03A                                                                                                                       | 7.612                           | 0.0094                          | 0.2850                                                  | 10.378                                         | 54.5 | 98.9                      | 21.27       | 0.05                  |
| 15A                                                                                                                       | 7.790                           | 0.0085                          | 0.7926                                                  | 9.252                                          | 60.0 | 97.0                      | 21.34       | 0.06                  |
| <b>Mean age <math>\pm 2\sigma</math></b>                                                                                  | n=15                            | MSWD=2.97                       |                                                         | 52.5 $\pm$ 30.3                                |      |                           | 21.12       | 0.06                  |
| <b>Notes:</b>                                                                                                             |                                 |                                 |                                                         |                                                |      |                           |             |                       |
| Isotopic ratios corrected for blank, radioactive decay, and mass discrimination, not corrected for interfering reactions. |                                 |                                 |                                                         |                                                |      |                           |             |                       |
| Errors quoted for individual analyses include analytical error only, without interfering reaction or J uncertainties.     |                                 |                                 |                                                         |                                                |      |                           |             |                       |
| Mean age is weighted mean age of Taylor (1982). Mean age error is weighted error                                          |                                 |                                 |                                                         |                                                |      |                           |             |                       |
| of the mean (Taylor, 1982), multiplied by the root of the MSWD where MSWD>1, and also                                     |                                 |                                 |                                                         |                                                |      |                           |             |                       |
| incorporates uncertainty in J factors and irradiation correction uncertainties.                                           |                                 |                                 |                                                         |                                                |      |                           |             |                       |
| Decay constants and isotopic abundances after Steiger and Jäger (1977).                                                   |                                 |                                 |                                                         |                                                |      |                           |             |                       |
| X symbol preceding sample ID denotes analyses excluded from mean age calculations.                                        |                                 |                                 |                                                         |                                                |      |                           |             |                       |
| Ages calculated relative to FC-2 Fish Canyon Tuff sanidine interlaboratory standard at 28.02 Ma                           |                                 |                                 |                                                         |                                                |      |                           |             |                       |
| Decay Constant (LambdaK (total)) = 5.543e-10/a                                                                            |                                 |                                 |                                                         |                                                |      |                           |             |                       |
| Correction factors:                                                                                                       |                                 |                                 |                                                         |                                                |      |                           |             |                       |
| $(^{39}\text{Ar}/^{37}\text{Ar})_{\text{Ca}} = 0.0007 \pm 5\text{e-}05$                                                   |                                 |                                 |                                                         |                                                |      |                           |             |                       |
| $(^{36}\text{Ar}/^{37}\text{Ar})_{\text{Ca}} = 0.00028 \pm 2\text{e-}05$                                                  |                                 |                                 |                                                         |                                                |      |                           |             |                       |
| $(^{38}\text{Ar}/^{39}\text{Ar})_K = 0.013$                                                                               |                                 |                                 |                                                         |                                                |      |                           |             |                       |
| $(^{40}\text{Ar}/^{39}\text{Ar})_K = 0.01 \pm 0.002$                                                                      |                                 |                                 |                                                         |                                                |      |                           |             |                       |

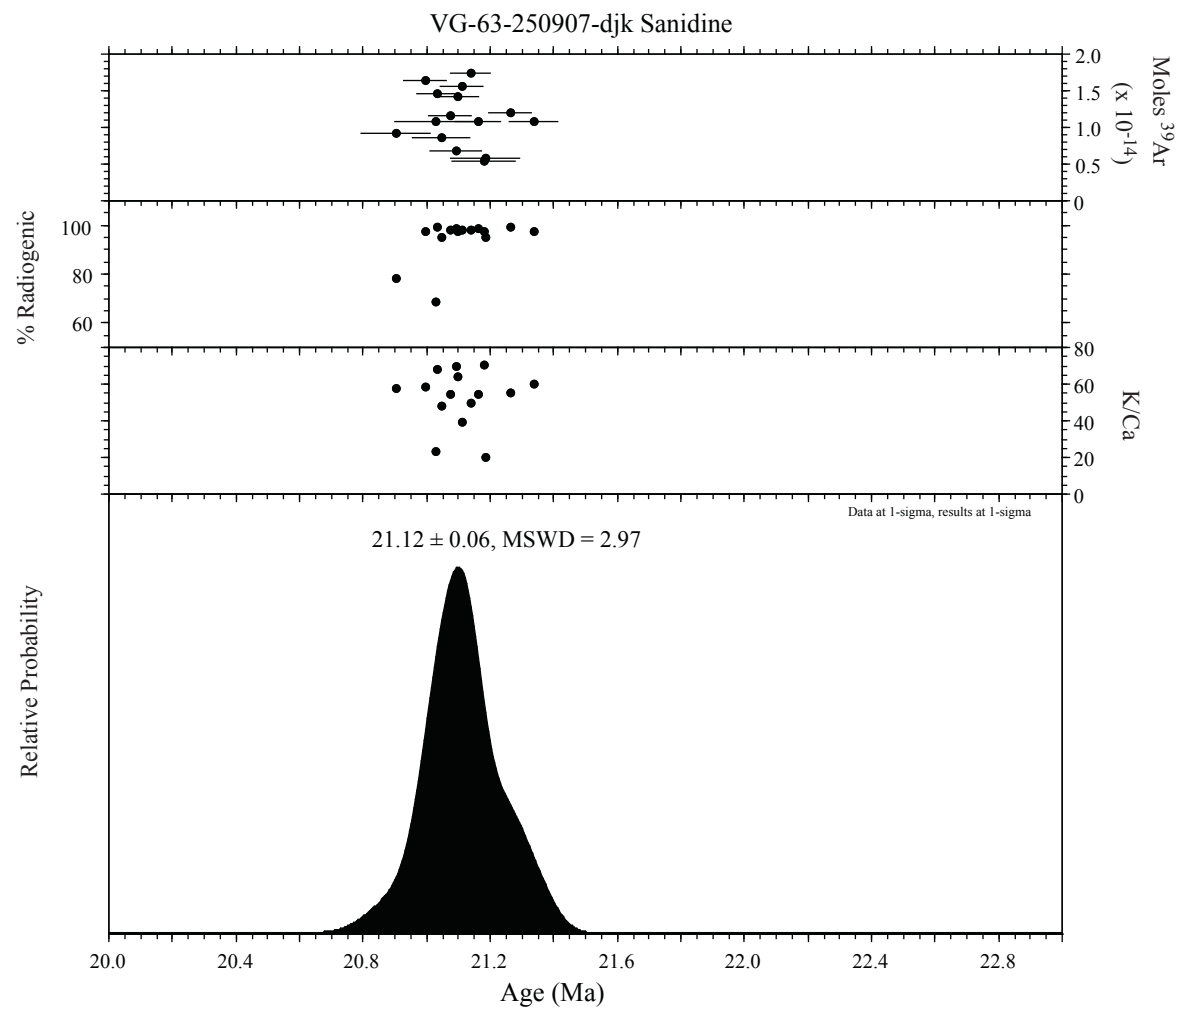

Figure 1. Age probability distribution diagram for VG-63-250907-djk sanidine. All errors quoted at 2 Sigma.

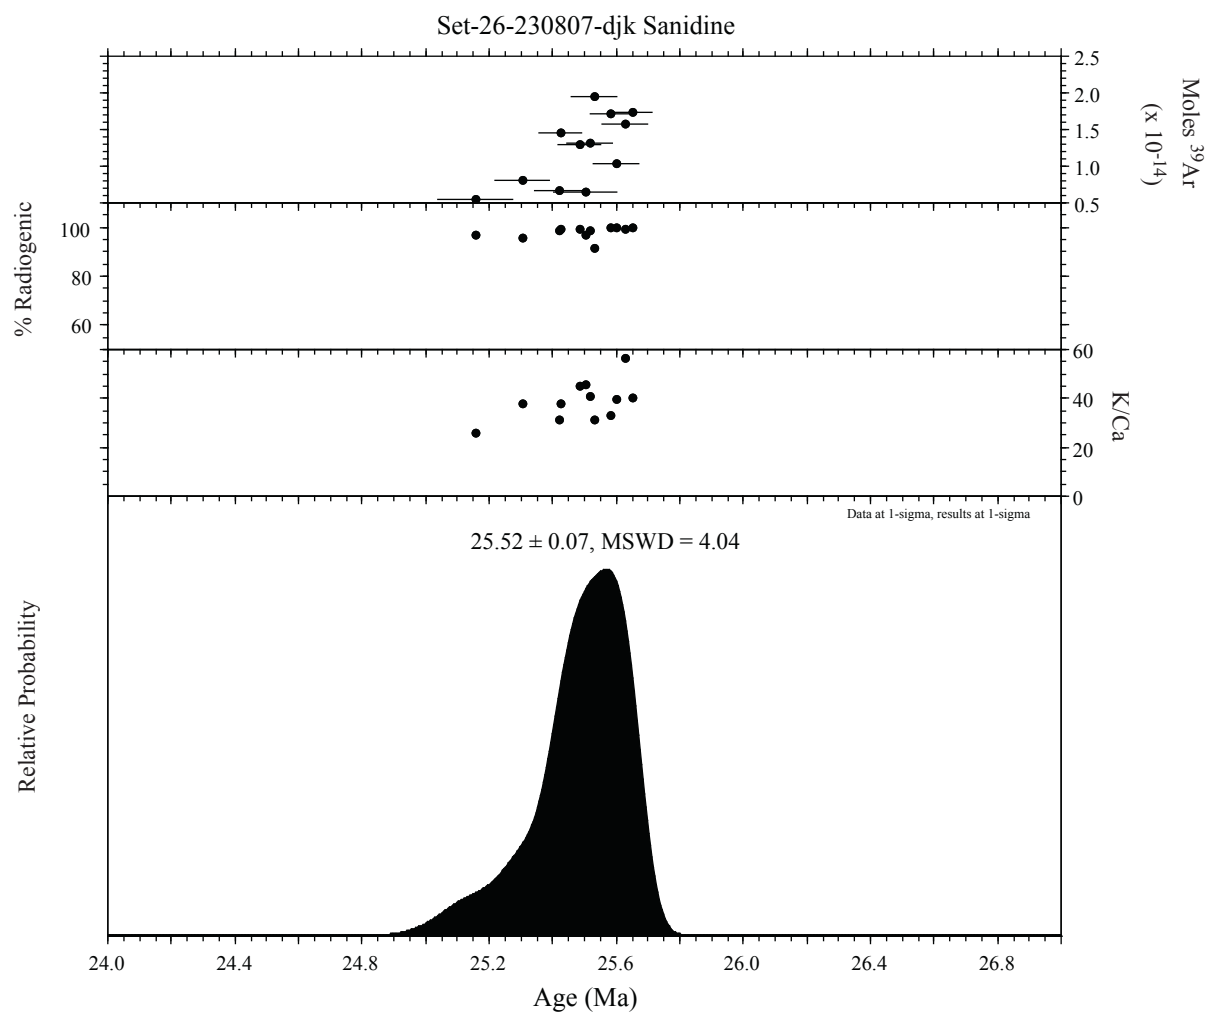

Figure 2. Age probability distribution diagram for Set-26-230807-djk sanidine. All errors quoted at 2 Sigma.

**New Mexico Bureau of Mines and Mineral Resources**

**Procedures of the New Mexico Geochronology Research Laboratory**

**For the Period June 1998 – present**

**Matthew Heizler**

**William C. McIntosh**

**Richard Esser**

**Lisa Peters**

## **$^{40}\text{Ar}/^{39}\text{Ar}$ and K-Ar dating**

Often, large bulk samples (either minerals or whole rocks) are required for K-Ar dating and even small amounts of xenocrystic, authigenic, or other non-ideal behavior can lead to inaccuracy. The K-Ar technique is susceptible to sample inhomogeneity as separate aliquots are required for the potassium and argon determinations. The need to determine absolute quantities (i.e. moles of  $^{40}\text{Ar}^*$  and  $^{40}\text{K}$ ) limits the precision of the K-Ar method to approximately 1% and also, the technique provides limited potential to evaluate underlying assumptions. In the  $^{40}\text{Ar}/^{39}\text{Ar}$  variant of the K-Ar technique, a sample is irradiated with fast neutrons thereby converting  $^{39}\text{K}$  to  $^{39}\text{Ar}$  through a (n,p) reaction. Following irradiation, the sample is either fused or incrementally heated and the gas analyzed in the same manner as in the conventional K-Ar procedure, with one exception, no argon spike need be added.

Some of the advantages of the  $^{40}\text{Ar}/^{39}\text{Ar}$  method over the conventional K-Ar technique are:

1. A single analysis is conducted on one aliquot of sample thereby reducing the sample size and eliminating sample inhomogeneity.
2. Analytical error incurred in determining absolute abundances is reduced by measuring only isotopic ratios. This also eliminates the need to know the exact weight of the sample.
3. The addition of an argon spike is not necessary.
4. The sample does not need to be completely fused, but rather can be incrementally heated. The  $^{40}\text{Ar}/^{39}\text{Ar}$  ratio (age) can be measured for each fraction of argon released and this allows for the generation of an age spectrum.

The age of a sample as determined with the  $^{40}\text{Ar}/^{39}\text{Ar}$  method requires comparison of the measured  $^{40}\text{Ar}/^{39}\text{Ar}$  ratio with that of a standard of known age. Also, several isotopes of other elements (Ca, K, Cl, Ar) produce argon during the irradiation procedure and must be corrected for. Far more in-depth details of the determination of an apparent age via the  $^{40}\text{Ar}/^{39}\text{Ar}$  method are given in Dalrymple et al. (1981) and McDougall and Harrison (1988).

## **Analytical techniques**

### *Sample Preparation and irradiation details*

Mineral separates are obtained in various fashions depending upon the mineral of interest, rock type and grain size. In almost all cases the sample is crushed in a jaw crusher and ground in a disc grinder and then sized. The size fraction used generally corresponds to the largest size possible which will permit obtaining a pure mineral separate. Following sizing, the sample is washed and dried. For plutonic and metamorphic rocks and lavas, crystals are separated using standard heavy liquid, Franz magnetic and hand-picking techniques. For volcanic sanidine and plagioclase, the sized sample is reacted with 15% HF acid to remove glass and/or matrix and then thoroughly washed prior to heavy liquid and magnetic separation. For groundmass concentrates, rock fragments are selected which do not contain any visible phenocrysts.

The NMGRL uses either the Ford reactor at the University of Michigan or the Nuclear Science Center reactor at Texas A&M University. At the Ford reactor, the L67 position is used (unless otherwise noted) and the D-3 position is always used at the Texas A&M reactor. All of the Michigan irradiations are carried out underwater without any shielding for thermal neutrons, whereas the Texas irradiations are in a dry location which is shielded with B and Cd. Depending upon the reactor used, the mineral separates are loaded into either holes drilled into Al discs or into 6 mm I.D. quartz tubes. Various Al discs are used. For Michigan, either six hole or twelve hole, 1 cm diameter discs are used and all holes are of equal size. Samples are placed in the 0, 120 and 240° locations and standards in the 60, 180 and 300° locations for the six hole disc. For the twelve hole disc, samples are located at 30, 60, 120, 150, 210, 240, 300, and 330° and standards at 0, 90, 180 and 270 degrees. If samples are loaded into the quartz tubes, they are wrapped in Cu foil with standards interleaved at ~0.5 cm intervals. For Texas, 2.4 cm diameter discs contain either sixteen or six sample holes with smaller holes used to hold the standards. For the six hole disc, sample locations are 30, 90, 150, 210, 270 and 330° and standards are at 0, 60, 120, 180, 240 and 300°. Samples are located at 18, 36, 54, 72, 108, 126, 144, 162, 198, 216, 234, 252, 288, 306, 324, 342 degrees and standards at 0, 90, 180 and 270 degrees in the sixteen hole disc. Following sample loading into the discs, the discs are stacked, screwed together and sealed

in vacuo in either quartz (Michigan) or Pyrex (Texas) tubes.

### *Extraction Line and Mass Spectrometer details*

The NMGRL argon extraction line has both a double vacuum Mo resistance furnace and a CO<sub>2</sub> laser to heat samples. The Mo furnace crucible is heated with a W heating element and the temperature is monitored with a W-Re thermocouple placed in a hole drilled into the bottom of the crucible. A one inch long Mo liner is placed in the bottom of the crucible to collect the melted samples. The furnace temperature is calibrated by either/or melting Cu foil or with an additional thermocouple inserted in the top of the furnace down to the liner. The CO<sub>2</sub> laser is a Synrad 10W laser equipped with a He-Ne pointing laser. The laser chamber is constructed from a 3 3/8" stainless steel conflat and the window material is ZnS. The extraction line is a two stage design. The first stage is equipped with a SAES GP-50 getter, whereas the second stage houses two SAES GP-50 getters and a tungsten filament. The first stage getter is operated at 450°C as is one of the second stage getters. The other second stage getter is operated at room temperature and the tungsten filament is operated at ~2000°C. Gases evolved from samples heated in the furnace are reacted with the first stage getter during heating. Following heating, the gas is expanded into the second stage for two minutes and then isolated from the first stage. During second stage cleaning, the first stage and furnace are pumped out. After gettering in the second stage, the gas is expanded into the mass spectrometer. Gases evolved from samples heated in the laser are expanded through a cold finger operated at -140°C and directly into the second stage. Following cleanup, the gas in the second stage and laser chamber is expanded into the mass spectrometer for analysis.

The NMGRL employs a MAP-215-50 mass spectrometer which is operated in static mode. The mass spectrometer is operated with a resolution ranging between 450 to 600 at mass 40 and isotopes are detected on a Johnston electron multiplier operated at ~2.1 kV with an overall gain of about 10,000 over the Faraday collector. Final isotopic intensities are determined by linear regression to time zero of the peak height versus time following gas introduction for each mass. Each mass intensity is corrected for mass spectrometer baseline and background and the extraction system blank.

Blanks for the furnace are generally determined at the beginning of a run while the furnace is cold and then between heating steps while the furnace is cooling. Typically, a blank is

run every three to six heating steps. Periodic furnace hot blank analysis reveals that the cold blank is equivalent to the hot blank for temperatures less than about 1300°C. Laser system blanks are generally determined between every four analyses. Mass discrimination is measured using atmospheric argon which has been dried using a Ti-sublimation pump. Typically, 10 to 15 replicate air analyses are measured to determine a mean mass discrimination value. Air pipette analyses are generally conducted 2-3 times per month, but more often when samples sensitive to the mass discrimination value are analyzed. Correction factors for interfering nuclear reactions on K and Ca are determined using K-glass and CaF<sub>2</sub>, respectively. Typically, 3-5 individual pieces of the salt or glass are fused with the CO<sub>2</sub> laser and the correction factors are calculated from the weighted mean of the individual determinations.

### *Data acquisition, presentation and age calculation*

Samples are either step-heated or fused in a single increment (total fusion). Bulk samples are often step-heated and the data are generally displayed on an age spectrum or isochron diagram. Single crystals are often analyzed by the total fusion method and the results are typically displayed on probability distribution diagrams or isochron diagrams.

#### The Age Spectrum Diagram

Age spectra plot apparent age of each incrementally heated gas fraction versus the cumulative % <sup>39</sup>Ar<sub>K</sub> released, with steps increasing in temperature from left to right. Each apparent age is calculated assuming that the trapped argon (argon not produced by *in situ* decay of <sup>40</sup>K) has the modern day atmospheric <sup>40</sup>Ar/<sup>36</sup>Ar value of 295.5. Additional parameters for each heating step are often plotted versus the cumulative % <sup>39</sup>Ar<sub>K</sub> released. These auxiliary parameters can aid age spectra interpretation and may include radiogenic yield (percent of <sup>40</sup>Ar which is not atmospheric), K/Ca (determined from measured Ca-derived <sup>37</sup>Ar and K-derived <sup>39</sup>Ar) and/or K/Cl (determined from measured Cl-derived <sup>38</sup>Ar and K-derived <sup>39</sup>Ar). Incremental heating analysis is often effective at revealing complex argon systematics related to excess argon, alteration, contamination, <sup>39</sup>Ar recoil, argon loss, etc. Often low-temperature heating steps have low radiogenic yields and apparent ages with relatively high errors due mainly to

loosely held, non-radiogenic argon residing on grain surfaces or along grain boundaries. An entirely or partially flat spectrum, in which apparent ages are the same within analytical error, may indicate that the sample is homogeneous with respect to K and Ar and has had a simple thermal and geological history. A drawback to the age spectrum technique is encountered when hydrous minerals such as micas and amphiboles are analyzed. These minerals are not stable in the ultra-high vacuum extraction system and thus step-heating can homogenize important details of the true  $^{40}\text{Ar}$  distribution. In other words, a flat age spectrum may result even if a hydrous sample has a complex argon distribution.

### The Isochron Diagram

Argon data can be plotted on isotope correlation diagrams to help assess the isotopic composition of Ar trapped at the time of argon closure, thereby testing the assumption that trapped argon isotopes have the composition of modern atmosphere which is implicit in age spectra. To construct an “inverse isochron” the  $^{36}\text{Ar}/^{40}\text{Ar}$  ratio is plotted versus the  $^{39}\text{Ar}/^{40}\text{Ar}$  ratio. A best fit line can be calculated for the data array which yields the value for the trapped argon (Y-axis intercept) and the  $^{40}\text{Ar}^*/^{39}\text{Ar}_K$  value (age) from the X-axis intercept. Isochron analysis is most useful for step-heated or total fusion data which have a significant spread in radiogenic yield. For young or low K samples, the calculated apparent age can be very sensitive to the composition of the trapped argon and therefore isochron analysis should be performed routinely on these samples (cf. Heizler and Harrison, 1988). For very old (>Mesozoic) samples or relatively old sanidines (>mid-Cenozoic) the data are often highly radiogenic and cluster near the X-axis thereby making isochron analysis of little value.

## The Probability Distribution Diagram

The probability distribution diagram, which is sometimes referred to as an ideogram, is a plot of apparent age versus the summation of the normal distribution of each individual analysis (Deino and Potts, 1992). This diagram is most effective at displaying single crystal laser fusion data to assess the distribution of the population. The K/Ca, radiogenic yield, and the moles of  $^{39}\text{Ar}$  for each analysis are also often displayed for each sample as this allows for visual ease in identifying apparent age correlations between, for instance, plagioclase contamination, signal size and/or radiogenic concentrations. The error ( $1\sigma$ ) for each age analysis is generally shown by the horizontal lines in the moles of  $^{39}\text{Ar}$  section. Solid symbols represent the analyses used for the weighted mean age calculation and the generation of the solid line on the ideogram, whereas open symbols represent data omitted from the age calculation. If shown, a dashed line represents the probability distribution of all of the displayed data. The diagram is most effective for displaying the form of the age distribution (i.e. gaussian, skewed, etc.) and for identifying xenocrystic or other grains which fall outside of the main population.

## Error Calculations

For step-heated samples, a plateau for the age spectrum is defined by the steps indicated. The plateau age is calculated by weighting each step on the plateau by the inverse of the variance and the error is calculated by either the method of Samson and Alexander (1987) or Taylor (1982). A mean sum weighted deviates (MSWD) value is determined by dividing the Chi-squared value by  $n-1$  degrees of freedom for the plateau ages. If the MSWD value is outside the 95% confidence window (cf. Mahon, 1996; Table 1), the plateau or preferred age error is multiplied by the square root of the MSWD.

For single crystal fusion data, a weighted mean is calculated using the inverse of the variance to weight each age determination (Taylor, 1982). Errors are calculated as described for the plateau ages above.

Isochron ages,  $^{40}\text{Ar}/^{36}\text{Ar}_i$  values and MSWD values are calculated from the regression results obtained by the York (1969) method.

## References cited

- Dalrymple, G.B., Alexander, E.C., Jr., Lanphere, M.A., and Kraker, G.P., 1981. Irradiation of samples for  $^{40}\text{Ar}/^{39}\text{Ar}$  dating using the Geological Survey TRIGA reactor. U.S.G.S., Prof. Paper, 1176.
- Deino, A., and Potts, R., 1990. Single-Crystal  $^{40}\text{Ar}/^{39}\text{Ar}$  dating of the Olorgesailie Formation, Southern Kenya Rift, J. Geophys. Res., 95, 8453-8470.
- Deino, A., and Potts, R., 1992. Age-probability spectra from examination of single-crystal  $^{40}\text{Ar}/^{39}\text{Ar}$  dating results: Examples from Olorgesailie, Southern Kenya Rift, Quat. International, 13/14, 47-53.
- Fleck, R.J., Sutter, J.F., and Elliot, D.H., 1977. Interpretation of discordant  $^{40}\text{Ar}/^{39}\text{Ar}$  age-spectra of Mesozoic tholeiites from Antarctica, Geochim. Cosmochim. Acta, 41, 15-32.
- Heizler, M. T., and Harrison, T. M., 1988. Multiple trapped argon components revealed by  $^{40}\text{Ar}/^{39}\text{Ar}$  analysis, Geochim. Cosmochim. Acta, 52, 295-1303.
- Mahon, K.I., 1996. The New “York” regression: Application of an improved statistical method to geochemistry, International Geology Review, 38, 293-303.
- McDougall, I., and Harrison, T.M., 1988. Geochronology and thermochronology by the  $^{40}\text{Ar}$ - $^{39}\text{Ar}$  method. Oxford University Press.
- Samson, S.D., and, Alexander, E.C., Jr., 1987. Calibration of the interlaboratory  $^{40}\text{Ar}/^{39}\text{Ar}$  dating standard, Mmhb-1, Chem. Geol., 66, 27-34.
- Steiger, R.H., and Jäger, E., 1977. Subcommission on geochronology: Convention on the use of decay constants in geo- and cosmochronology. Earth and Planet. Sci. Lett., 36, 359-362.
- Taylor, J.R., 1982. An Introduction to Error Analysis: The Study of Uncertainties in Physical Measurements,. Univ. Sci. Books, Mill Valley, Calif., 270 p.
- York, D., 1969. Least squares fitting of a straight line with correlated errors, Earth and Planet. Sci. Lett., 5, 320-324.
