# Supplementary material
Source: publisher figshare collection journal article supplement (https://gsapubs.figshare.com/ndownloader/files/23295149)
Supplement: Supplementary file 1 [file 23295149 › 2013139-App_C_biotite_sanidine_data.XLS]

## Sheet: Koning step 2.Laser.Summary
GSA DR Item 2013139 accompanies Koning, D.J., Grauch, V.J.S., Connell, S.D., Ferguson, J., McIntosh, W., Slate, J.L., Wan, E., and Baldridge, W.S., 2013, Structure
and tectonic evolution of the eastern Española Basin, Rio Grande rift, north-central New Mexico, in Hudson, M.R., and Grauch, V.J.S., eds., New Perspectives on Rio Grande
Rift Basins: From Tectonics to Groundwater: Geological Society of America Special Paper 494, p. 185–219, https://doi.org/10.1130/2013.2494(08).
Appendix C. Summary of 40Ar/39Ar results for tephra biotite or sanidine
								Mean Age							Isochron Age									Integrated Age
Sample	Unit	UTM coord zone 13; NAD 27) m	Lab #	Irradation	min	analysis	n	MSWD	K/Ca	±	2s	Age(Ma)	±	2s	40Ar/36Ar	±	2s	Age(Ma)	±	2s		n	MSWD	K/Ca	±	2s	Age(Ma)	±	2s
SCV-946FU-251102-djk	Cejita Mbr (Chamita Fm)	3,987,345 ± 20 N 400,880 ±20 E	54283	NM-170	Biotite, single crystal	Mean	6	0.96	2.3	±	1.7	13.0782	±	0.407029
SCV-948-251102-djk	Cejita Mbr (Chamita Fm),	3,987,440 ± 20 N 400,530 ± 20 E	54435	NM-172	Biotite, single crystal	Mean	8	2.47	0.52	±	0.22	12.0629	±	0.721949
SCV-318-230702-djk	Cuarteles Mbr (Tesuque Fm)	3,988,340 ± 15 N 409,670 ± 15 E	54436	NM-172	Biotite, single crystal	Mean	14	3.85	0.31	±	0	12.7055	±	0.743374
SCV-1014-051202-djk	Ojo Caliente Sandstone (Tesuque Fm)	3,986,170 ± 20 N 398,980 ± 20 E	54437	NM-172	Biotite, single crystal	Mean	12	2.74	0.64	±	1.66	12.7423	±	2.13046
SCV-1154-160103-djk	Cuarteles Mbr (Tesuque Fm)	3,996,440 ± 20 N 411,160 ± 20 E	54445	NM-172	Biotite, single crystal	Mean	14	4.02	5.6	±	13.7	9.4579	±	0.467086
Set-26-230807-djk	lower coarse unit (Tesuque Fm)	3,958,665 ± 8 N 419,464 ± 8 E	59156	NM-226	Sanidine, single crystal	Mean	12	4	38.4	±	16.2	25.52	±	0.07
Sample preparation and irradiation:
Minerals separated with standard heavy liquid, Franz Magnetic and hand-picking techniques.
Neutron flux monitor Fish Canyon Tuff sanidine (FC-2). Assigned age = 28.02 Ma (Renne et al, 1998).
Instrumentation:
Analyses performed on a Mass Analyzer Products 215-50 mass spectrometer on line with automated all-metal extraction system.
Biotite and groundmass concentrates step-heated, using a Mo double-vacuum resistance furnace.
Sanidine, biotite and flux monitor fused or step-heated by a 50 watt Synrad CO2 laser.
Notes:
Fm = Formation; Mbr = Member
Any use of trade names is for descriptive purposes only and does not imply endorsement by the U.S. Government.
Reference:
Renne, P.R., C.C. Swisher, A.L. Deino, D.B. Karner, T.L. Owens and D.J. Depaolo, 1998, Intercalibration of standards: absolute ages and uncertainties in 40Ar/39Ar dating:
Chemical Geology, v. 145, p.117-152.

## Sheet: Koning step 2.Laser
Table 1. 40Ar/39Ar analytical data.
	ID	40Ar/39Ar	37Ar/39Ar	36Ar/39Ar	39ArK	K/Ca	40Ar*	Age	±1s										Run_ID	Sample	Ar36_Over_Ar39	Ar36_Over_Ar39_Er	PctAr36Ca	Ar37_Over_Ar39	Ar37_Over_Ar39_Er	Ca_Over_K	Ca_Over_K_Er	Cl_Over_K	Cl_Over_K_Er	Ar38_Over_Ar39	Ar38_Over_Ar39_Er	Ar40_Over_Ar39	Ar40_Over_Ar39_Er	Ar40Rad_Over_Ar39	Ar40Rad_Over_Ar39_Er	PctAr40Rad	PctAr40Rad_Er	Age	Age_Er	Age_Er_with_J_er	Age_Monte_Carlo	Age_Er_with_external_error	EMV_Axial	EMV_Off_axis	Ar39_Moles	Ar40_Moles	Irrad	J	J_Er
				(x 10-3)	(x 10-15 mol)		(%)	(Ma)	(Ma)
	SCV-946FV-251102-djk bi, C13:170, Biotite, single crystal, J=0.0008245±0.09%, D=0.00081±1.00562, NM-170, Lab#=54283
	03B	31.5823	0.215778	77.6422	9.83787	2.36449	27.4107	12.8337	0.234066										54283-03B	SCV-946FV-251102-djk bi, C13:170	0.0776422	0.0004399	0.0778157	0.215778	0.0012107	0.422924	0.002373	0.0106049	5.10192e-07	0.0290112	0.000827	31.5823	0.0834929	8.65818	0.158473	27.4107	0.43133	12.8337	0.234066	0.234367	0.234791	0	2.24116		9.72529e-15	3.07147e-13	NM-170	0.0008245	7.66e-07
	07B	23.4977	0.15005	48.5406	2.00625	3.40023	39.0099	13.5855	1.00703										54283-07B	SCV-946FV-251102-djk bi, C13:170	0.0485406	0.0022835	0.0865543	0.15005	0.0061002	0.294098	0.0119565	0.011866	2.47852e-06	0.0239807	0.0038478	23.4977	0.190424	9.1673	0.682092	39.0099	2.88779	13.5855	1.00703	1.00711	0.971316	0	2.24112		1.42893e-15	3.35765e-14	NM-170	0.0008245	7.66e-07
	02B	44.6237	0.263663	119.934	3.7545	1.93506	20.628	13.6436	1.11426										54283-02B	SCV-946FV-251102-djk bi, C13:170	0.119934	0.002619	0.0615554	0.263663	0.006662	0.51678	0.0130575	0.0066875	2.70993e-06	0.0355989	0.0041143	44.6237	0.333297	9.20665	0.754746	20.628	1.66354	13.6436	1.11426	1.11433	1.15512	0	2.24116		1.35852e-15	6.06223e-14	NM-170	0.0008245	7.66e-07
	01B	36.6261	0.166389	92.7046	6.15718	3.06632	25.2435	13.7028	0.657259										54283-01B	SCV-946FV-251102-djk bi, C13:170	0.0927046	0.0014989	0.0502554	0.166389	0.0049235	0.326124	0.00965	0.0148563	2.0017e-06	0.0332992	0.0024363	36.6261	0.154915	9.24672	0.445209	25.2435	1.18352	13.7028	0.657259	0.657381	0.65521	0	2.24115		2.32264e-15	8.50691e-14	NM-170	0.0008245	7.66e-07
	09B	20.0552	0.352442	35.8498	1.68826	1.44763	47.3231	14.0663	1.24412										54283-09B	SCV-946FV-251102-djk bi, C13:170	0.0358498	0.0028285	0.27527	0.352442	0.0097085	0.690786	0.0190286	0.0071351	3.94795e-06	0.0199846	0.0048233	20.0552	0.187372	9.493	0.842902	47.3231	4.18798	14.0663	1.24412	1.24419	1.20476	0	2.24114		1.14485e-15	2.29602e-14	NM-170	0.0008245	7.66e-07
	04B	24.9942	0.365732	52.1692	1.9293	1.39502	38.4436	14.2405	0.903615										54283-04B	SCV-946FV-251102-djk bi, C13:170	0.0521692	0.0020269	0.196294	0.365732	0.0069679	0.716835	0.013657	0.02447	2.83842e-06	0.0290249	0.0033796	24.9942	0.216273	9.61104	0.612267	38.4436	2.43381	14.2405	0.903615	0.903711	0.918506	0	2.24115		1.60106e-15	4.00171e-14	NM-170	0.0008245	7.66e-07
xi	10B	31.5483	1.94655	73.8507	0.988651	0.262107	31.3377	14.6669	3.24869										54283-10B	SCV-946FV-251102-djk bi, C13:170	0.0738507	0.0074881	0.738021	1.94655	0.043784	3.81523	0.0858167	0.0101383	1.78e-05	0.0282772	0.0124516	31.5483	0.667242	9.89996	2.20175	31.3377	6.94367	14.6669	3.24869	3.24872	3.24074	0	2.24115		4.36992e-16	1.37864e-14	NM-170	0.0008245	7.66e-07
xi	08B	24.9533	0.178884	46.2285	0.392268	2.85215	45.3144	16.7444	4.56655										54283-08B	SCV-946FV-251102-djk bi, C13:170	0.0462285	0.0103462	0.108348	0.178884	0.027662	0.350613	0.0542176	-0.0019158	1.12e-05	0.0187971	0.0175446	24.9533	0.902298	11.3088	3.09848	45.3144	12.3827	16.7444	4.56655	4.56658	4.48401	0	2.24112		2.95765e-16	7.38032e-15	NM-170	0.0008245	7.66e-07
xi	05B	30.4823	0.652115	63.4978	0.55878	0.782384	38.6215	17.4358	3.81339										54283-05B	SCV-946FV-251102-djk bi, C13:170	0.0634978	0.008666	0.287557	0.652115	0.027856	1.27815	0.0545978	0.012935	1.13e-05	0.0271957	0.0146533	30.4823	0.914243	11.778	2.58843	38.6215	8.45414	17.4358	3.81339	3.81342	3.65429	0	2.24113		3.76334e-16	1.14715e-14	NM-170	0.0008245	7.66e-07
xi	06B	29.1268	0.478006	54.3211	0.355952	1.06736	45.0258	19.4102	6.71087										54283-06B	SCV-946FV-251102-djk bi, C13:170	0.0543211	0.0153033	0.24639	0.478006	0.0454603	0.936892	0.0891023	0.0164795	1.85e-05	0.0266823	0.0262567	29.1268	1.37284	13.1189	4.56016	45.0258	15.5756	19.4102	6.71087	6.7109	6.44384	0	2.24114		2.03782e-16	5.93552e-15	NM-170	0.0008245	7.66e-07
	Mean age ± 2s		n=6	MSWD=0.96		2.3 ±1.7		13.0782	0.407029
	SCV-948-251102-djk,G1:172, single xtal bi, J=0.0007585±0.10%, D=0.001±1.005, NM-172, Lab#=54435
xi	03B	1178.12	-14.74	3979.05	12.5849	-	0.0927244	1.47899	7.6507										54435-03B	SCV-948-251102-djk,G1:172	3.97905	0.0573005	-0.103723	-14.74	0.238985	-28.8904	0.468411	0.0557596	9.77e-05	0.775364	0.0130478	1178.12	16.7757	1.08125	5.59551	0.0927244	0.268583	1.47899	7.6507	7.6507	7.78733	0	2.18964		8.14511e-16	9.59591e-13	NM-172	0.0007585	7.66e-07
xi	15B	658.02	-346.273	2108.99	0.801701	-	0.937122	6.7792	14.034										54435-15B	SCV-948-251102-djk,G1:172	2.109	0.319159	-4.59728	-346.273	52.0512	-678.695	102.02	0.1514	0.0211345	0.430985	0.0993575	658.02	99.0256	4.96338	10.2943	0.937122	1.90047	6.7792	14.034	14.034	13.8032	0	2.18966		3.56104e-17	2.34324e-14	NM-172	0.0007585	7.66e-07
	05B	46.2236	0.890528	129.407	5.43928	0.572923	17.4323	10.9997	0.544846										54435-05B	SCV-948-251102-djk,G1:172	0.129407	0.0012781	0.192685	0.890528	0.0212525	1.74544	0.0416549	0.0187707	8.65659e-06	0.0415927	0.0009933	46.2236	0.168083	8.06285	0.400594	17.4323	0.792578	10.9997	0.544846	0.544959	0.510548	0	2.18966		2.83731e-15	1.31151e-13	NM-172	0.0007585	7.66e-07
	07B	206.108	-5.51799	667.872	9.42142	-	4.02468	11.2722	1.46145										54435-07B	SCV-948-251102-djk,G1:172	0.667872	0.0040972	-0.231337	-5.51799	0.0389906	-10.8153	0.0764216	0.0146505	1.64e-05	0.140686	0.001982	206.108	1.08829	8.26324	1.07468	4.02468	0.353182	11.2722	1.46145	1.46149	1.3696	0	2.18965		2.20928e-15	4.5535e-13	NM-172	0.0007585	7.66e-07
	01B	58.6531	-0.797492	168.493	14.2224	-	14.9999	11.9925	0.352976										54435-01B	SCV-948-251102-djk,G1:172	0.168493	0.0005258	-0.132527	-0.797492	0.003563	-1.56308	0.0069834	0.0157138	1.57537e-06	0.0477369	0.0004022	58.6531	0.111088	8.79297	0.259666	14.9999	0.26729	11.9925	0.352976	0.353183	0.348218	0	2.18965		1.30366e-14	7.64635e-13	NM-172	0.0007585	7.66e-07
	11B	64.5747	-1.58856	188.228	14.6476	-	13.6626	12.0194	0.454525										54435-11B	SCV-948-251102-djk,G1:172	0.188228	0.0008971	-0.236308	-1.58856	0.0160393	-3.11358	0.031437	0.0234633	6.62948e-06	0.0540484	0.0008743	64.5747	0.169816	8.81276	0.334375	13.6626	0.374796	12.0194	0.454525	0.454686	0.428167	0	2.18966		6.35855e-15	4.10602e-13	NM-172	0.0007585	7.66e-07
	14B	29.816	0.760687	68.4971	1.59392	0.670715	32.3282	13.149	0.867285										54435-14B	SCV-948-251102-djk,G1:172	0.0684971	0.0021666	0.310951	0.760687	0.0676314	1.49095	0.132557	0.0335142	2.75e-05	0.0352381	0.0031332	29.816	0.305889	9.64402	0.638424	32.3282	2.10178	13.149	0.867285	0.867386	0.836978	0	2.18966		7.37008e-16	2.19746e-14	NM-172	0.0007585	7.66e-07
	02B	289.122	-56.2411	923.173	1.62691	-	4.03979	15.3124	4.96944										54435-02B	SCV-948-251102-djk,G1:172	0.923173	0.0338164	-1.7058	-56.2411	1.94946	-110.233	3.82093	0.281743	0.0007927	0.276627	0.0137401	289.122	10.0783	11.2375	3.66249	4.03979	1.25215	15.3124	4.96944	4.96946	5.06248	0	2.18965		2.14886e-16	6.21284e-14	NM-172	0.0007585	7.66e-07
	13B	80.6923	-163.988	184.352	0.392217	-	15.6794	15.464	6.56443										54435-13B	SCV-948-251102-djk,G1:172	0.184352	0.0221612	-24.9071	-163.988	12.1825	-321.416	23.8777	0.135872	0.0049478	0.0791005	0.028779	80.6923	6.12867	11.3493	4.8384	15.6794	6.59828	15.464	6.56443	6.56445	6.63532	0	2.18966		7.62534e-17	6.15306e-15	NM-172	0.0007585	7.66e-07
	08B	101.503	1.61528	305.249	4.20607	0.315861	11.2667	15.5993	1.07286										54435-08B	SCV-948-251102-djk,G1:172	0.305249	0.0027695	0.148167	1.61528	0.047091	3.16595	0.0922983	0.0205188	1.92e-05	0.0752446	0.0021946	101.503	0.569962	11.449	0.790826	11.2667	0.68539	15.5993	1.07286	1.07298	1.09026	0	2.18968		1.49351e-15	1.51596e-13	NM-172	0.0007585	7.66e-07
xi	06B	257.704	4.327	822.31	0.936462	0.117912	5.84893	20.571	5.77141										54435-06B	SCV-948-251102-djk,G1:172	0.82231	0.0339648	0.147336	4.327	0.358895	8.48091	0.703433	0.10597	0.0001458	0.201936	0.0167504	257.704	9.99258	15.1187	4.26596	5.84893	1.59047	20.571	5.77141	5.77145	5.83715	0	2.18966		1.50753e-16	3.88496e-14	NM-172	0.0007585	7.66e-07
xi	10B	127.644	3.38106	372.356	0.388851	0.150901	14.023	24.3864	6.3465										54435-10B	SCV-948-251102-djk,G1:172	0.372356	0.0218297	0.254245	3.38106	0.766158	6.62688	1.50167	0.221305	0.0003111	0.157209	0.035625	127.644	5.70841	17.9419	4.70097	14.023	3.60944	24.3864	6.3465	6.34655	6.22326	0	2.18967		1.03442e-16	1.32037e-14	NM-172	0.0007585	7.66e-07
	Mean age ± 2s		n=8	MSWD=2.47		0.52 ±0.22		12.0629	0.721949
	SCV-318-230702-djk,G2:172, single xtal bi, J=0.0007581±0.10%, D=0.001±1.005, NM-172, Lab#=54436
	04B	28.6148	-5.00431	67.4755	7.0595	-	28.8746	11.2263	0.357478										54436-04B	SCV-318-230702-djk,G2:172	0.0674755	0.0008772	-2.07662	-5.00431	0.0462542	-9.80845	0.0906583	0.025797	1.92e-05	0.0319247	0.0020041	28.6148	0.150019	8.2335	0.262996	28.8746	0.858418	11.2263	0.357478	0.357657	0.357342	0	2.18965		2.432e-15	6.9591e-14	NM-172	0.0007581	7.66e-07
	17B	74.2532	-18.0928	217.294	3.84258	-	11.5122	11.5086	1.16817										54436-17B	SCV-318-230702-djk,G2:172	0.217294	0.0041234	-2.3314	-18.0928	0.290134	-35.4619	0.568662	0.0747159	0.0001186	0.0758549	0.0060407	74.2532	1.0996	8.44121	0.859553	11.5122	1.10327	11.5086	1.16817	1.16823	1.16955	0	2.18969		7.76647e-16	5.76685e-14	NM-172	0.0007581	7.66e-07
	06B	84.9522	-2.13241	257.95	10.2479	-	10.067	11.642	0.590452										54436-06B	SCV-318-230702-djk,G2:172	0.257949	0.0011872	-0.23147	-2.13241	0.014661	-4.17953	0.0287355	0.020445	6.18169e-06	0.0660454	0.0007995	84.9522	0.278167	8.53937	0.434494	10.067	0.355667	11.642	0.590452	0.590568	0.590509	0	2.18966		5.07549e-15	4.31174e-13	NM-172	0.0007581	7.66e-07
	10B	146.13	-2.33729	462.696	33.7063	-	6.30296	12.5334	0.966635										54436-10B	SCV-318-230702-djk,G2:172	0.462696	0.0028158	-0.141441	-2.33729	0.0295694	-4.58109	0.057956	0.0112766	1.21e-05	0.101282	0.0015435	146.13	0.779899	9.19548	0.711666	6.30296	0.305279	12.5334	0.966635	0.966718	0.967028	0	2.18966		4.85208e-15	7.09037e-13	NM-172	0.0007581	7.66e-07
	05B	143.345	-0.637358	453.691	38.7198	-	6.43692	12.5706	0.900507										54436-05B	SCV-318-230702-djk,G2:172	0.453691	0.0022012	-0.0393352	-0.637358	0.0135889	-1.24922	0.0266342	0.0176529	5.53957e-06	0.101927	0.0008534	143.345	0.605039	9.22288	0.662994	6.43692	0.264572	12.5706	0.900507	0.900596	0.861002	0	2.18966		7.73135e-15	1.10825e-12	NM-172	0.0007581	7.66e-07
	13B	102.537	-1.92692	315.085	27.4647	-	9.0416	12.6189	0.696712										54436-13B	SCV-318-230702-djk,G2:172	0.315085	0.0019902	-0.171236	-1.92692	0.0142899	-3.77676	0.0280082	0.0441738	5.99433e-06	0.0849633	0.001109	102.537	0.56128	9.25845	0.512965	9.0416	0.333485	12.6189	0.696712	0.696828	0.698246	0	2.18965		5.67692e-15	5.82092e-13	NM-172	0.0007581	7.66e-07
	07B	121.707	-0.807283	379.717	83.4308	-	7.75174	12.8506	0.725081										54436-07B	SCV-318-230702-djk,G2:172	0.379717	0.0016574	-0.0595284	-0.807283	0.0064409	-1.58228	0.0126241	0.0254794	2.69018e-06	0.0907331	0.0006506	121.707	0.464091	9.42906	0.53392	7.75174	0.226693	12.8506	0.725081	0.725196	0.757911	0	2.18964		1.24652e-14	1.5171e-12	NM-172	0.0007581	7.66e-07
	18B	67.5653	-9.84835	192.973	9.93044	-	14.3992	13.1672	0.938573										54436-18B	SCV-318-230702-djk,G2:172	0.192973	0.0028891	-1.42897	-9.84835	0.10614	-19.3028	0.208035	0.0677282	4.38e-05	0.0695415	0.0027242	67.5653	0.679278	9.66221	0.691249	14.3992	0.957141	13.1672	0.938573	0.938667	0.978003	0	2.18968		1.35629e-15	9.16379e-14	NM-172	0.0007581	7.66e-07
	03B	135.748	-4.70508	423.414	17.3596	-	7.54395	13.9069	0.956274										54436-03B	SCV-318-230702-djk,G2:172	0.423414	0.0033128	-0.311143	-4.70508	0.0363945	-9.22196	0.0713332	0.0376095	1.52e-05	0.102802	0.0016825	135.748	0.952328	10.2071	0.704574	7.54395	0.357392	13.9069	0.956274	0.956377	0.95885	0	2.18965		2.48489e-15	3.37318e-13	NM-172	0.0007581	7.66e-07
	08B	76.3747	-5.81504	221.861	9.86093	-	13.5315	14.0231	0.721565										54436-08B	SCV-318-230702-djk,G2:172	0.221861	0.0022301	-0.733888	-5.81504	0.0517562	-11.3975	0.101442	0.0376751	2.15e-05	0.0649213	0.0018263	76.3747	0.591542	10.2927	0.531677	13.5315	0.592601	14.0231	0.721565	0.721703	0.760222	0	2.18966		2.00766e-15	1.53335e-13	NM-172	0.0007581	7.66e-07
	02B	141.669	-1.23423	443.883	48.4344	-	7.3414	14.1572	0.840706										54436-02B	SCV-318-230702-djk,G2:172	0.443883	0.0020556	-0.0778547	-1.23423	0.0093051	-2.41909	0.0182381	0.0299612	3.89932e-06	0.104283	0.0008485	141.669	0.588549	10.3915	0.61951	7.3414	0.222042	14.1572	0.840706	0.840826	0.87031	0	2.18966		6.76885e-15	9.58938e-13	NM-172	0.0007581	7.66e-07
	01B	80.5785	1.62654	238.007	3.66823	0.313675	12.8865	14.1627	0.93882										54436-01B	SCV-318-230702-djk,G2:172	0.238007	0.0026384	0.191352	1.62654	0.0550833	3.18801	0.107963	0.0569978	2.24e-05	0.0752078	0.0025478	80.5785	0.616234	10.3956	0.691812	12.8865	0.773524	14.1627	0.93882	0.938928	0.912197	0	2.18966		1.21324e-15	9.77608e-14	NM-172	0.0007581	7.66e-07
	09B	127.575	-0.0413139	396.049	244.413	-	8.26185	14.3584	0.714622										54436-09B	SCV-318-230702-djk,G2:172	0.396049	0.0017596	-0.0029208	-0.0413139	0.0039948	-0.0809753	0.0078299	0.0297494	1.62222e-06	0.0953309	0.0006896	127.575	0.530884	10.5398	0.526659	8.26185	0.173025	14.3584	0.714622	0.714768	0.710291	0	2.18965		2.05685e-14	2.62404e-12	NM-172	0.0007581	7.66e-07
	12B	141.34	-0.446391	439.533	162.148	-	8.08163	15.551	0.800179										54436-12B	SCV-318-230702-djk,G2:172	0.439533	0.0031239	-0.0284369	-0.446391	0.0046388	-0.874925	0.009092	0.0421343	1.91544e-06	0.107727	0.0010652	141.34	0.992439	11.419	0.590102	8.08163	0.177701	15.551	0.800179	0.800332	0.779721	0	2.18967		2.02907e-14	2.8679e-12	NM-172	0.0007581	7.66e-07
xi	16B	82.9771	1.71543	235.568	6.27414	0.297421	16.2824	18.407	1.47453										54436-16B	SCV-318-230702-djk,G2:172	0.235568	0.0057577	0.203898	1.71543	0.159399	3.36223	0.312423	0.0671061	6.47e-05	0.0782429	0.0072709	82.9771	1.65308	13.5268	1.08913	16.2824	1.2221	18.407	1.47453	1.47464	1.44141	0	2.1897		6.61859e-16	5.49192e-14	NM-172	0.0007581	7.66e-07
xi	15B	359.434	-14.4018	1165.27	11.1002	-	3.86965	18.7361	2.83986										54436-15B	SCV-318-230702-djk,G2:172	1.16527	0.0251752	-0.346058	-14.4018	0.368284	-28.2275	0.721837	0.0846762	0.0001499	0.257442	0.0112861	359.434	7.64077	13.77	2.09799	3.86965	0.438046	18.7361	2.83986	2.83993	2.65262	0	2.18964		8.10902e-16	2.91466e-13	NM-172	0.0007581	7.66e-07
xi	11B	395.695	4.39927	1259.34	5.02345	0.115975	6.04514	32.5229	5.95029										54436-11B	SCV-318-230702-djk,G2:172	1.25934	0.0746791	0.097813	4.39927	0.506266	8.62257	0.99228	-0.132855	0.0002056	0.201588	0.0231996	395.695	23.1872	23.9942	4.42959	6.04514	0.987753	32.5229	5.95029	5.95037	5.70927	0	2.18965		3.03648e-16	1.20152e-13	NM-172	0.0007581	7.66e-07
xi	14B	212.832	-18.6001	584.779	10.0352	-	18.0867	51.2387	2.74369										54436-14B	SCV-318-230702-djk,G2:172	0.584779	0.0178802	-0.890597	-18.6001	0.599654	-36.4562	1.17532	0.118082	0.0002439	0.159715	0.0129592	212.832	6.23493	37.9994	2.06379	18.0867	0.75879	51.2387	2.74369	2.74417	2.81612	0	2.18965		6.5768e-16	1.39975e-13	NM-172	0.0007581	7.66e-07
	Mean age ± 2s		n=14	MSWD=3.85		0.31 ±0.00		12.7055	0.743374
	SCV-1014-051202-djk,G#:172, single xtal bi, J=0.0007576±0.10%, D=0.001±1.005, NM-172, Lab#=54437
	14B	92.6093	0.744478	290.266	1.05654	0.685317	7.44863	9.40816	2.71173										54437-14B	SCV-1014-051202-djk,G#:172	0.290266	0.0081476	0.0718148	0.744478	0.0690691	1.45918	0.135375	0.0308759	2.8e-05	0.0759351	0.0126347	92.6093	1.66694	6.9017	1.99448	7.44863	2.1159	9.40816	2.71173	2.71175	2.77371	0	2.18967		3.13042e-16	2.89906e-14	NM-172	0.0007576	7.66e-07
	12B	99.0624	0.174685	310.934	0.99477	2.92071	7.26285	9.80773	2.42798										54437-12B	SCV-1014-051202-djk,G#:172	0.310934	0.008201	0.0157306	0.174685	0.0982113	0.342383	0.192494	-0.0282999	3.99e-05	0.0593631	0.0182571	99.0624	2.017	7.19562	1.78618	7.26285	1.75799	9.80773	2.42798	2.428	2.32237	0	2.18965		3.03885e-16	3.01036e-14	NM-172	0.0007576	7.66e-07
	06B	198.46	3.5193	647.625	0.589078	0.144973	3.71908	10.0843	5.27412										54437-06B	SCV-1014-051202-djk,G#:172	0.647625	0.0268991	0.152157	3.5193	0.334736	6.89783	0.656082	0.0776613	0.0001359	0.159336	0.015156	198.46	7.5914	7.39912	3.88058	3.71908	1.90685	10.0843	5.27412	5.27413	5.20431	0	2.18966		1.23315e-16	2.44733e-14	NM-172	0.0007576	7.66e-07
	08B	49.3398	1.01034	140.944	2.33484	0.504984	15.7583	10.6027	0.956764										54437-08B	SCV-1014-051202-djk,G#:172	0.140944	0.0027083	0.200714	1.01034	0.0773521	1.98026	0.15161	0.0242563	3.14e-05	0.0456582	0.0034959	49.3398	0.553578	7.78059	0.704167	15.7583	1.37245	10.6027	0.956764	0.956824	0.938351	0	2.18968		6.1989e-16	3.05852e-14	NM-172	0.0007576	7.66e-07
	15B	71.285	0.310035	209.329	1.1665	1.64564	13.2654	12.8808	1.66796										54437-15B	SCV-1014-051202-djk,G#:172	0.209329	0.0045916	0.0414704	0.310035	0.113084	0.607668	0.221644	0.0784242	4.59e-05	0.0771101	0.006466	71.285	0.883936	9.45826	1.22915	13.2654	1.68027	12.8808	1.66796	1.66801	1.63634	0	2.18968		4.48531e-16	3.19735e-14	NM-172	0.0007576	7.66e-07
	03B	272.601	4.57952	889.566	0.993688	0.11141	3.71095	13.8173	7.40521										54437-03B	SCV-1014-051202-djk,G#:172	0.889566	0.0503014	0.144145	4.57952	0.890596	8.97587	1.74557	0.0867387	0.0003616	0.207944	0.0404407	272.601	14.5947	10.1486	5.45987	3.71095	1.94863	13.8173	7.40521	7.40522	7.93152	0	2.18969		1.13051e-16	3.08178e-14	NM-172	0.0007576	7.66e-07
	07B	119.659	1.94275	367.399	0.646694	0.262619	9.40474	15.3361	4.03888										54437-07B	SCV-1014-051202-djk,G#:172	0.367399	0.0148317	0.14806	1.94275	0.201317	3.80779	0.394582	0.0232913	8.17e-05	0.0878874	0.0091078	119.659	3.85714	11.2689	2.98038	9.40474	2.443	15.3361	4.03888	4.03891	4.0386	0	2.18967		1.59523e-16	1.90883e-14	NM-172	0.0007576	7.66e-07
	10B	65.6292	0.940892	183.844	0.825395	0.542256	17.341	15.4978	2.87812										54437-10B	SCV-1014-051202-djk,G#:172	0.183844	0.0078442	0.143301	0.940892	0.299761	1.84415	0.587531	-0.0084005	0.0001217	0.0424413	0.0135218	65.6292	1.43961	11.3882	2.12402	17.341	3.1987	15.4978	2.87812	2.87817	2.87142	0	2.18964		3.13901e-16	2.06011e-14	NM-172	0.0007576	7.66e-07
	09B	117.488	2.30361	354.22	1.00546	0.221481	11.0726	17.7212	2.64213										54437-09B	SCV-1014-051202-djk,G#:172	0.35422	0.0093176	0.182093	2.30361	0.168494	4.51507	0.330248	0.077164	6.84e-05	0.104019	0.007609	117.488	2.46252	13.03	1.95226	11.0726	1.60389	17.7212	2.64213	2.64219	2.58786	0	2.18966		2.7651e-16	3.24867e-14	NM-172	0.0007576	7.66e-07
	01B	178.142	2.50467	559.441	1.11172	0.203701	7.3165	17.7571	3.88025										54437-01B	SCV-1014-051202-djk,G#:172	0.559441	0.0182349	0.125359	2.50467	0.262619	4.90916	0.514734	-0.005774	0.0001066	0.113941	0.0119475	178.142	5.26748	13.0566	2.86717	7.3165	1.54828	17.7571	3.88025	3.88029	3.8507	0	2.18969		2.46164e-16	4.3852e-14	NM-172	0.0007576	7.66e-07
	02B	114.361	2.25775	339.225	1.17875	0.225979	12.5118	19.4813	4.03594										54437-02B	SCV-1014-051202-djk,G#:172	0.339225	0.0175101	0.186357	2.25775	0.680715	4.42519	1.3342	0.0812206	0.0002764	0.102601	0.0309352	114.361	4.98679	14.3312	2.98506	12.5118	2.5241	19.4813	4.03594	4.03599	4.09087	0	2.18967		1.43663e-16	1.64294e-14	NM-172	0.0007576	7.66e-07
	04B	62.9131	2.18248	158.987	0.71376	0.233772	25.6199	21.9291	2.59612										54437-04B	SCV-1014-051202-djk,G#:172	0.158987	0.0071982	0.384368	2.18248	0.255935	4.27767	0.501633	0.168855	0.0001039	0.0989961	0.0116096	62.9131	1.57378	16.1429	1.92275	25.6199	2.97824	21.9291	2.59612	2.59621	2.76842	0	2.18966		2.25019e-16	1.41567e-14	NM-172	0.0007576	7.66e-07
xi	11B	214.413	0.605484	647.438	0.864932	0.842638	10.7966	31.3778	8.58064										54437-11B	SCV-1014-051202-djk,G#:172	0.647438	0.0609605	0.0261856	0.605484	0.470076	1.18675	0.921348	0.133083	0.0001909	0.178178	0.0529411	214.413	19.1538	23.1592	6.38839	10.7966	2.79543	31.3778	8.58064	8.58069	8.33288	0	2.18964		6.25388e-17	1.34091e-14	NM-172	0.0007576	7.66e-07
xi	05B	258.025	7.04939	787.592	0.536706	0.0723757	10.0338	35.2137	17.1322										54437-05B	SCV-1014-051202-djk,G#:172	0.787592	0.110316	0.250616	7.04939	1.64263	13.8168	3.21956	0.46518	0.0006669	0.319498	0.0744504	258.025	33.6899	26.0181	12.7823	10.0338	4.73772	35.2137	17.1322	17.1322	17.1172	0	2.18967		3.76156e-17	9.70576e-15	NM-172	0.0007576	7.66e-07
	Mean age ± 2s		n=12	MSWD=2.74		0.64 ±1.66		12.7423	2.13046
	SCV-1154-160103-djkbi,G12:172, single xtal bi, J=0.0007563±0.10%, D=0.001±1.005, NM-172, Lab#=54445
	08B	138.033	0.133772	448.011	25.1728	3.81398	4.09832	7.70263	0.89502										54445-08B	SCV-1154-160103-djkbi,G12:172	0.448011	0.0015409	0.0083605	0.133772	0.0132609	0.262193	0.0259914	0.0051044	5.38494e-06	0.0965961	0.0014527	138.033	0.311617	5.65755	0.658793	4.09832	0.280811	7.70263	0.89502	0.895054	0.90096	0	2.1897		8.87497e-15	1.22504e-12	NM-172	0.0007563	7.66e-07
	06B	60.2336	0.189709	183.656	9.61373	2.6894	9.92707	8.14092	0.557257										54445-06B	SCV-1154-160103-djkbi,G12:172	0.183656	0.0012974	0.0289229	0.189709	0.0114561	0.37183	0.0224539	0.0177264	4.65354e-06	0.0513546	0.0018115	60.2336	0.220905	5.9802	0.410277	9.92707	0.571958	8.14092	0.557257	0.557318	0.550789	0	2.1897		3.29406e-15	1.98413e-13	NM-172	0.0007563	7.66e-07
	07B	123.023	0.0743573	396.056	15.3295	6.86152	4.873	8.16131	0.820036										54445-07B	SCV-1154-160103-djkbi,G12:172	0.396056	0.0015416	0.0052568	0.0743573	0.0058738	0.14574	0.0115127	0.0096508	2.38549e-06	0.0884112	0.001053	123.023	0.342585	5.99522	0.603754	4.873	0.306029	8.16131	0.820036	0.820077	0.795246	0	2.1897		6.27964e-15	7.72541e-13	NM-172	0.0007563	7.66e-07
	04B	98.7258	0.603455	313.05	23.6803	0.845472	6.35059	8.53762	0.639682										54445-04B	SCV-1154-160103-djkbi,G12:172	0.31305	0.0011077	0.0539746	0.603455	0.0051834	1.18277	0.0101595	0.009469	2.15678e-06	0.0728173	0.0017297	98.7258	0.228198	6.2723	0.471066	6.35059	0.289191	8.53762	0.639682	0.639741	0.638711	0	2.18973		1.01857e-14	1.00559e-12	NM-172	0.0007563	7.66e-07
	11B	53.425	0.29554	159.219	19.8404	1.72635	11.98	8.7132	0.399645										54445-11B	SCV-1154-160103-djkbi,G12:172	0.159219	0.0007767	0.0519731	0.29554	0.0039745	0.579257	0.00779	0.0087174	1.63011e-06	0.043672	0.0009651	53.425	0.12184	6.40161	0.29433	11.98	0.414551	8.7132	0.399645	0.399742	0.369755	0	2.18971		1.21875e-14	6.51117e-13	NM-172	0.0007563	7.66e-07
	13B	39.0902	0.137863	110.244	11.5339	3.70081	16.6917	8.88128	0.289752										54445-13B	SCV-1154-160103-djkbi,G12:172	0.110244	0.0005586	0.0350147	0.137863	0.0040038	0.270211	0.0078475	0.0131686	1.62912e-06	0.0360055	0.0008241	39.0902	0.0943302	6.5254	0.213416	16.6917	0.420048	8.88128	0.289752	0.289891	0.295714	0	2.1897		9.16956e-15	3.5844e-13	NM-172	0.0007563	7.66e-07
	02B	86.5037	0.116306	270.577	9.72073	4.38672	7.58116	8.92622	0.573455										54445-02B	SCV-1154-160103-djkbi,G12:172	0.270577	0.0009296	0.0120357	0.116306	0.003667	0.227961	0.0071874	0.0105212	1.49159e-06	0.0651725	0.0010056	86.5037	0.195566	6.5585	0.422387	7.58116	0.312127	8.92622	0.573455	0.573526	0.573805	0	2.18972		8.34646e-15	7.21999e-13	NM-172	0.0007563	7.66e-07
	01B	92.8819	0.289033	291.323	14.5234	1.76521	7.34302	9.28352	0.725828										54445-01B	SCV-1154-160103-djkbi,G12:172	0.291323	0.0015103	0.0277799	0.289033	0.0141128	0.566505	0.0276612	0.0188745	5.73427e-06	0.0719589	0.0011661	92.8819	0.255644	6.8217	0.534725	7.34302	0.435396	9.28352	0.725828	0.725889	0.725128	0	2.18972		5.62763e-15	5.22705e-13	NM-172	0.0007563	7.66e-07
	10B	42.286	0.165819	120.044	6.64364	3.07687	16.1443	9.29143	0.439476										54445-10B	SCV-1154-160103-djkbi,G12:172	0.120044	0.0009838	0.038677	0.165819	0.0119443	0.325006	0.0234108	0.0068338	4.85111e-06	0.0356621	0.0011581	42.286	0.120586	6.82753	0.323768	16.1443	0.680493	9.29143	0.439476	0.439576	0.426811	0	2.1897		4.68814e-15	1.98243e-13	NM-172	0.0007563	7.66e-07
	12B	32.8194	0.151693	87.3473	9.53152	3.3634	21.3928	9.55497	0.244104										54445-12B	SCV-1154-160103-djkbi,G12:172	0.0873473	0.0004741	0.0486267	0.151693	0.0035321	0.297318	0.0069229	0.0107353	1.43893e-06	0.0308717	0.0010294	32.8194	0.0848657	7.0217	0.179861	21.3928	0.433877	9.55497	0.244104	0.244295	0.244954	0	2.1897		8.45412e-15	2.77459e-13	NM-172	0.0007563	7.66e-07
	03B	115.177	0.27084	365.365	13.7495	1.88378	6.28093	9.84517	0.756748										54445-03B	SCV-1154-160103-djkbi,G12:172	0.365365	0.0013374	0.020756	0.27084	0.0100035	0.530846	0.0196068	0.0122159	4.06693e-06	0.0835532	0.0025768	115.177	0.274923	7.23554	0.557678	6.28093	0.300615	9.84517	0.756748	0.756813	0.75092	0	2.18971		6.16704e-15	7.10301e-13	NM-172	0.0007563	7.66e-07
	14B	28.893	0.0201958	71.7876	1.72108	25.2629	26.5861	10.4504	0.524861										54445-14B	SCV-1154-160103-djkbi,G12:172	0.0717876	0.0012051	0.0078772	0.0201958	0.0174006	0.0395839	0.0341051	0.0061033	7.06464e-06	0.0263448	0.0022001	28.893	0.211225	7.6816	0.386921	26.5861	1.30161	10.4504	0.524861	0.524967	0.532766	0	2.18971		1.87015e-15	5.40344e-14	NM-172	0.0007563	7.66e-07
	15B	31.8133	0.0313132	81.6591	5.66023	16.2936	24.159	10.4562	0.332826										54445-15B	SCV-1154-160103-djkbi,G12:172	0.0816591	0.0007516	0.010737	0.0313132	0.0078532	0.0613739	0.0153924	0.0092866	3.18851e-06	0.0292954	0.0015985	31.8133	0.11952	7.6859	0.245356	24.159	0.697256	10.4562	0.332826	0.332994	0.30519	0	2.18971		4.14004e-15	1.31708e-13	NM-172	0.0007563	7.66e-07
	05B	57.3546	0.248486	166.471	17.521	2.05325	14.268	11.1327	0.408643										54445-05B	SCV-1154-160103-djkbi,G12:172	0.166471	0.0008071	0.0417947	0.248486	0.0066543	0.487032	0.0130424	0.0147827	2.70862e-06	0.0471201	0.0013998	57.3546	0.139923	8.18474	0.301361	14.268	0.38591	11.1327	0.408643	0.408798	0.384629	0	2.18972		7.4128e-15	4.25158e-13	NM-172	0.0007563	7.66e-07
xi	09B	128.291	0.0786086	181.457	5.11662	6.49043	58.2096	99.1213	0.904823										54445-09B	SCV-1154-160103-djkbi,G12:172	0.181457	0.001909	0.0121298	0.0786086	0.0221241	0.154073	0.0433632	0.0176256	8.98258e-06	0.0508984	0.002259	128.291	0.626595	74.6818	0.700628	58.2096	0.42909	99.1213	0.904823	0.910081	0.902052	0	2.18971		1.60019e-15	2.05291e-13	NM-172	0.0007563	7.66e-07
	Mean age ± 2s		n=14	MSWD=4.02		5.6 ±13.7		9.4579	0.467086
	Notes:
	Isotopic ratios corrected for blank, radioactive decay, and mass discrimination, not corrected for interfering reactions.
	Errors quoted for individual analyses include analytical error only, without interfering reaction or J uncertainties.
	Mean age is weighted mean age of Taylor (1982). Mean age error is weighted error
	of the mean (Taylor, 1982), multiplied by the root of the MSWD where MSWD>1, and also																		--- Atmospheric argon ratios and discrimination ---
	incorporates uncertainty in J factors and irradiation correction uncertainties.																		(40Ar/36Ar)atm	295.5 ± 0.5
	Decay constants and isotopic abundances after Steiger and Jäger (1977).																		(40Ar/38Ar)atm	1575 ± 2
	# symbol preceding sample ID denotes analyses excluded from mean age calculations.																		Source of spectrometer discrimination value and error	Data file
	Ages calculated relative to FC-2 Fish Canyon Tuff sanidine interlaboratory standard at 28.02 Ma
	Decay Constant (LambdaK (total)) = 5.543e-10/a																		Source of spectrometer sensitivity value and error	Saved with run
	Correction factors:																		--- Source of J and use of J Adjustment Table ---
	(39Ar/37Ar)Ca = 0.0007 ± 2e-05																		Use J saved with run	FALSE
	(36Ar/37Ar)Ca = 0.00028 ± 5e-06																		J adjustment table useage	Use as J
	(38Ar/39Ar)K = 0.01077
	(40Ar/39Ar)K = 0.0002 ± 0.0003																		--- Minor irradiation parameters (see also Irradiation Data File) ---
																			(38Ar/37Ar)Ca	0.00014 ± 0
																			(38Ar/39Ar)K	0.01077 ± 0
																			P(36Cl/38Cl)	320 ± 0
																			--- Decay constants ---
																			Lambda 40K epsilon	5.810000e-11 ± 5.810000e-11
																			Lambda 40K Beta	4.962000e-10 ± 4.962000e-10
																			Lambda 37Ar	0.01975 ± 0
																			Lambda 39Ar	7.068000e-6 ± 0
																			Lambda 36Cl	6.308000e-9 ± 0
																			--- Calculation options ---
																			Normalize gain	FALSE
																			Always calculate without ratios	FALSE
																			Calc. %40Ar* as %40*/(40*+40Atm)	TRUE
																			Number of trials in Monte Carlo sim.	1000
																			37Ar/39Ar calculation	Normal
																			H35Cl Correction	FALSE
																			--- Isotope curve fitting ---
																			Parabolic vs. Linear probability cutoff	0.05
																			Error envelope as 1 or 2 sigma	2
																			Delete outliers within cycles before fit	TRUE
																			Average cycles before fit	FALSE
																			Delete outliers after fit	TRUE
																			Number of iterations of deleting outliers after fit	1
																			Cutoff for detecting outliers, sigma	2
																			Method of centroid location is	mean
																			--- Files ---
																			Irradiation data file	Macintosh HD:Users:mcintosh:KAr:Aux.Data:Irradiation Data pre and#142B57
																			J Adjustment table	Macintosh HD:Users:mcintosh:Desktop: Kelley 2008:J-Adjustment:J-Adjustment Jemez 28.02
																			Run data file #1	Macintosh HD:Users:mcintosh:Desktop: Koning 2008:MS data koning:MS Lookup Table
[truncated: 107 more columns]

## Sheet: Koning step 2
Run_ID	Sample	Ar36_Over_Ar39	Ar36_Over_Ar39_Er	PctAr36Ca	Ar37_Over_Ar39	Ar37_Over_Ar39_Er	Ca_Over_K	Ca_Over_K_Er	Cl_Over_K	Cl_Over_K_Er	Ar38_Over_Ar39	Ar38_Over_Ar39_Er	Ar40_Over_Ar39	Ar40_Over_Ar39_Er	Ar40Rad_Over_Ar39	Ar40Rad_Over_Ar39_Er	PctAr40Rad	PctAr40Rad_Er	Age	Age_Er	Age_Er_with_J_er	Age_Monte_Carlo	Age_Er_with_external_error	EMV_Axial	EMV_Off_axis	Ar39_Moles	Ar40_Moles	Irrad	J	J_Er	37_Decay	39_Decay	Ca_39_Over_37	Ca_39_Over_37_Er	Ca_38_Over_37	Ca_38_Over_37_Er	Ca_36_Over_37	Ca_36_Over_37_Er	K_38_Over_39	K_38_Over_39_Er	K_40_Over_39	K_40_Over_39_Er	K_37_Over_39	K_37_Over_39_Er	P36Cl_Over_38Cl	P36Cl_Over_38Cl_Er	Ca_Over_K_Multiplier	Ca_Over_K_Multiplier_Er	System_
54283-01B	SCV-946FV-251102-djk bi, C13:170	0.0927046	0.0014989	0.0502554	0.166389	0.0049235	0.326124	0.00965	0.0148563	2.0017e-06	0.0332992	0.0024363	36.6261	0.154915	9.24672	0.445209	25.2435	1.18352	13.7028	0.657259	0.657381	0.65521	0	2.24115		2.32264e-15	8.50691e-14	NM-170	0.0008245	7.66e-07	3.94308	1.00049	0.0007	2e-05	0.00014	0	0.00028	5e-06	0.01077	0	0.0002	0.0003	0	0	320	0	1.96	0	3
54283-02B	SCV-946FV-251102-djk bi, C13:170	0.119934	0.002619	0.0615554	0.263663	0.006662	0.51678	0.0130575	0.0066875	2.70993e-06	0.0355989	0.0041143	44.6237	0.333297	9.20665	0.754746	20.628	1.66354	13.6436	1.11426	1.11433	1.15512	0	2.24116		1.35852e-15	6.06223e-14	NM-170	0.0008245	7.66e-07	3.94646	1.00049	0.0007	2e-05	0.00014	0	0.00028	5e-06	0.01077	0	0.0002	0.0003	0	0	320	0	1.96	0	3
54283-03B	SCV-946FV-251102-djk bi, C13:170	0.0776422	0.0004399	0.0778157	0.215778	0.0012107	0.422924	0.002373	0.0106049	5.10192e-07	0.0290112	0.000827	31.5823	0.0834929	8.65818	0.158473	27.4107	0.43133	12.8337	0.234066	0.234367	0.234791	0	2.24116		9.72529e-15	3.07147e-13	NM-170	0.0008245	7.66e-07	3.95077	1.00049	0.0007	2e-05	0.00014	0	0.00028	5e-06	0.01077	0	0.0002	0.0003	0	0	320	0	1.96	0	3
54283-04B	SCV-946FV-251102-djk bi, C13:170	0.0521692	0.0020269	0.196294	0.365732	0.0069679	0.716835	0.013657	0.02447	2.83842e-06	0.0290249	0.0033796	24.9942	0.216273	9.61104	0.612267	38.4436	2.43381	14.2405	0.903615	0.903711	0.918506	0	2.24115		1.60106e-15	4.00171e-14	NM-170	0.0008245	7.66e-07	3.95395	1.00049	0.0007	2e-05	0.00014	0	0.00028	5e-06	0.01077	0	0.0002	0.0003	0	0	320	0	1.96	0	3
54283-05B	SCV-946FV-251102-djk bi, C13:170	0.0634978	0.008666	0.287557	0.652115	0.027856	1.27815	0.0545978	0.012935	1.13e-05	0.0271957	0.0146533	30.4823	0.914243	11.778	2.58843	38.6215	8.45414	17.4358	3.81339	3.81342	3.65429	0	2.24113		3.76334e-16	1.14715e-14	NM-170	0.0008245	7.66e-07	3.95808	1.00049	0.0007	2e-05	0.00014	0	0.00028	5e-06	0.01077	0	0.0002	0.0003	0	0	320	0	1.96	0	3
54283-06B	SCV-946FV-251102-djk bi, C13:170	0.0543211	0.0153033	0.24639	0.478006	0.0454603	0.936892	0.0891023	0.0164795	1.85e-05	0.0266823	0.0262567	29.1268	1.37284	13.1189	4.56016	45.0258	15.5756	19.4102	6.71087	6.7109	6.44384	0	2.24114		2.03782e-16	5.93552e-15	NM-170	0.0008245	7.66e-07	3.96171	1.00049	0.0007	2e-05	0.00014	0	0.00028	5e-06	0.01077	0	0.0002	0.0003	0	0	320	0	1.96	0	3
54283-07B	SCV-946FV-251102-djk bi, C13:170	0.0485406	0.0022835	0.0865543	0.15005	0.0061002	0.294098	0.0119565	0.011866	2.47852e-06	0.0239807	0.0038478	23.4977	0.190424	9.1673	0.682092	39.0099	2.88779	13.5855	1.00703	1.00711	0.971316	0	2.24112		1.42893e-15	3.35765e-14	NM-170	0.0008245	7.66e-07	3.96605	1.00049	0.0007	2e-05	0.00014	0	0.00028	5e-06	0.01077	0	0.0002	0.0003	0	0	320	0	1.96	0	3
54283-08B	SCV-946FV-251102-djk bi, C13:170	0.0462285	0.0103462	0.108348	0.178884	0.027662	0.350613	0.0542176	-0.0019158	1.12e-05	0.0187971	0.0175446	24.9533	0.902298	11.3088	3.09848	45.3144	12.3827	16.7444	4.56655	4.56658	4.48401	0	2.24112		2.95765e-16	7.38032e-15	NM-170	0.0008245	7.66e-07	3.96955	1.00049	0.0007	2e-05	0.00014	0	0.00028	5e-06	0.01077	0	0.0002	0.0003	0	0	320	0	1.96	0	3
54283-09B	SCV-946FV-251102-djk bi, C13:170	0.0358498	0.0028285	0.27527	0.352442	0.0097085	0.690786	0.0190286	0.0071351	3.94795e-06	0.0199846	0.0048233	20.0552	0.187372	9.493	0.842902	47.3231	4.18798	14.0663	1.24412	1.24419	1.20476	0	2.24114		1.14485e-15	2.29602e-14	NM-170	0.0008245	7.66e-07	3.97393	1.00049	0.0007	2e-05	0.00014	0	0.00028	5e-06	0.01077	0	0.0002	0.0003	0	0	320	0	1.96	0	3
54283-10B	SCV-946FV-251102-djk bi, C13:170	0.0738507	0.0074881	0.738021	1.94655	0.043784	3.81523	0.0858167	0.0101383	1.78e-05	0.0282772	0.0124516	31.5483	0.667242	9.89996	2.20175	31.3377	6.94367	14.6669	3.24869	3.24872	3.24074	0	2.24115		4.36992e-16	1.37864e-14	NM-170	0.0008245	7.66e-07	3.97716	1.00049	0.0007	2e-05	0.00014	0	0.00028	5e-06	0.01077	0	0.0002	0.0003	0	0	320	0	1.96	0	3
54435-01B	SCV-948-251102-djk,G1:172	0.168493	0.0005258	-0.132527	-0.797492	0.003563	-1.56308	0.0069834	0.0157138	1.57537e-06	0.0477369	0.0004022	58.6531	0.111088	8.79297	0.259666	14.9999	0.26729	11.9925	0.352976	0.353183	0.348218	0	2.18965		1.30366e-14	7.64635e-13	NM-172	0.0007585	7.66e-07	21.4382	1.0011	0.0007	2e-05	0.00014	0	0.00028	5e-06	0.01077	0	0.0002	0.0003	0	0	320	0	1.96	0	3
54435-02B	SCV-948-251102-djk,G1:172	0.923173	0.0338164	-1.7058	-56.2411	1.94946	-110.233	3.82093	0.281743	0.0007927	0.276627	0.0137401	289.122	10.0783	11.2375	3.66249	4.03979	1.25215	15.3124	4.96944	4.96946	5.06248	0	2.18965		2.14886e-16	6.21284e-14	NM-172	0.0007585	7.66e-07	21.4545	1.0011	0.0007	2e-05	0.00014	0	0.00028	5e-06	0.01077	0	0.0002	0.0003	0	0	320	0	1.96	0	3
54435-03B	SCV-948-251102-djk,G1:172	3.97905	0.0573005	-0.103723	-14.74	0.238985	-28.8904	0.468411	0.0557596	9.77e-05	0.775364	0.0130478	1178.12	16.7757	1.08125	5.59551	0.0927244	0.268583	1.47899	7.6507	7.6507	7.78733	0	2.18964		8.14511e-16	9.59591e-13	NM-172	0.0007585	7.66e-07	21.4778	1.0011	0.0007	2e-05	0.00014	0	0.00028	5e-06	0.01077	0	0.0002	0.0003	0	0	320	0	1.96	0	3
54435-04B	SCV-948-251102-djk,G1:172	2.17286	0.150679	-1.91725	-148.783	10.2324	-291.615	20.0554	-0.0140628	0.004156	0.4017	0.0607124	651.491	44.6464	-2.62777	7.68122	-0.445355	1.23938	-3.59946	10.5321	10.5321	10.6765	0	2.18965		8.41396e-17	5.48162e-14	NM-172	0.0007585	7.66e-07	21.4946	1.0011	0.0007	2e-05	0.00014	0	0.00028	5e-06	0.01077	0	0.0002	0.0003	0	0	320	0	1.96	0	3
54435-05B	SCV-948-251102-djk,G1:172	0.129407	0.0012781	0.192685	0.890528	0.0212525	1.74544	0.0416549	0.0187707	8.65659e-06	0.0415927	0.0009933	46.2236	0.168083	8.06285	0.400594	17.4323	0.792578	10.9997	0.544846	0.544959	0.510548	0	2.18966		2.83731e-15	1.31151e-13	NM-172	0.0007585	7.66e-07	21.5173	1.0011	0.0007	2e-05	0.00014	0	0.00028	5e-06	0.01077	0	0.0002	0.0003	0	0	320	0	1.96	0	3
54435-06B	SCV-948-251102-djk,G1:172	0.82231	0.0339648	0.147336	4.327	0.358895	8.48091	0.703433	0.10597	0.0001458	0.201936	0.0167504	257.704	9.99258	15.1187	4.26596	5.84893	1.59047	20.571	5.77141	5.77145	5.83715	0	2.18966		1.50753e-16	3.88496e-14	NM-172	0.0007585	7.66e-07	21.5343	1.0011	0.0007	2e-05	0.00014	0	0.00028	5e-06	0.01077	0	0.0002	0.0003	0	0	320	0	1.96	0	3
54435-07B	SCV-948-251102-djk,G1:172	0.667872	0.0040972	-0.231337	-5.51799	0.0389906	-10.8153	0.0764216	0.0146505	1.64e-05	0.140686	0.001982	206.108	1.08829	8.26324	1.07468	4.02468	0.353182	11.2722	1.46145	1.46149	1.3696	0	2.18965		2.20928e-15	4.5535e-13	NM-172	0.0007585	7.66e-07	21.5571	1.0011	0.0007	2e-05	0.00014	0	0.00028	5e-06	0.01077	0	0.0002	0.0003	0	0	320	0	1.96	0	3
54435-08B	SCV-948-251102-djk,G1:172	0.305249	0.0027695	0.148167	1.61528	0.047091	3.16595	0.0922983	0.0205188	1.92e-05	0.0752446	0.0021946	101.503	0.569962	11.449	0.790826	11.2667	0.68539	15.5993	1.07286	1.07298	1.09026	0	2.18968		1.49351e-15	1.51596e-13	NM-172	0.0007585	7.66e-07	21.5739	1.0011	0.0007	2e-05	0.00014	0	0.00028	5e-06	0.01077	0	0.0002	0.0003	0	0	320	0	1.96	0	3
54435-10B	SCV-948-251102-djk,G1:172	0.372356	0.0218297	0.254245	3.38106	0.766158	6.62688	1.50167	0.221305	0.0003111	0.157209	0.035625	127.644	5.70841	17.9419	4.70097	14.023	3.60944	24.3864	6.3465	6.34655	6.22326	0	2.18967		1.03442e-16	1.32037e-14	NM-172	0.0007585	7.66e-07	21.6139	1.0011	0.0007	2e-05	0.00014	0	0.00028	5e-06	0.01077	0	0.0002	0.0003	0	0	320	0	1.96	0	3
54435-11B	SCV-948-251102-djk,G1:172	0.188228	0.0008971	-0.236308	-1.58856	0.0160393	-3.11358	0.031437	0.0234633	6.62948e-06	0.0540484	0.0008743	64.5747	0.169816	8.81276	0.334375	13.6626	0.374796	12.0194	0.454525	0.454686	0.428167	0	2.18966		6.35855e-15	4.10602e-13	NM-172	0.0007585	7.66e-07	21.6368	1.0011	0.0007	2e-05	0.00014	0	0.00028	5e-06	0.01077	0	0.0002	0.0003	0	0	320	0	1.96	0	3
54435-12B	SCV-948-251102-djk,G1:172	1.7166	0.226253	0.190111	11.6552	3.03337	22.8442	5.9454	0.600793	0.0012316	0.540927	0.140784	483.222	62.1469	-23.2408	16.1202	-4.77031	3.22468	-32.0867	22.455	22.455	23.0926	0	2.18966		3.64174e-17	1.75977e-14	NM-172	0.0007585	7.66e-07	21.654	1.0011	0.0007	2e-05	0.00014	0	0.00028	5e-06	0.01077	0	0.0002	0.0003	0	0	320	0	1.96	0	3
54435-13B	SCV-948-251102-djk,G1:172	0.184352	0.0221612	-24.9071	-163.988	12.1825	-321.416	23.8777	0.135872	0.0049478	0.0791005	0.028779	80.6923	6.12867	11.3493	4.8384	15.6794	6.59828	15.464	6.56443	6.56445	6.63532	0	2.18966		7.62534e-17	6.15306e-15	NM-172	0.0007585	7.66e-07	21.6771	1.0011	0.0007	2e-05	0.00014	0	0.00028	5e-06	0.01077	0	0.0002	0.0003	0	0	320	0	1.96	0	3
54435-14B	SCV-948-251102-djk,G1:172	0.0684971	0.0021666	0.310951	0.760687	0.0676314	1.49095	0.132557	0.0335142	2.75e-05	0.0352381	0.0031332	29.816	0.305889	9.64402	0.638424	32.3282	2.10178	13.149	0.867285	0.867386	0.836978	0	2.18966		7.37008e-16	2.19746e-14	NM-172	0.0007585	7.66e-07	21.6945	1.0011	0.0007	2e-05	0.00014	0	0.00028	5e-06	0.01077	0	0.0002	0.0003	0	0	320	0	1.96	0	3
54435-15B	SCV-948-251102-djk,G1:172	2.109	0.319159	-4.59728	-346.273	52.0512	-678.695	102.02	0.1514	0.0211345	0.430985	0.0993575	658.02	99.0256	4.96338	10.2943	0.937122	1.90047	6.7792	14.034	14.034	13.8032	0	2.18966		3.56104e-17	2.34324e-14	NM-172	0.0007585	7.66e-07	21.7176	1.0011	0.0007	2e-05	0.00014	0	0.00028	5e-06	0.01077	0	0.0002	0.0003	0	0	320	0	1.96	0	3
54435-9B	SCV-948-251102-djk,G1:172	1.32217	0.12134	-4.4761	-211.364	18.8873	-414.273	37.0191	0.44372	0.00767	0.394939	0.0708516	394.098	35.2517	-12.2645	7.96804	-3.57248	2.2689	-16.8615	11.006	11.006	10.9465	0	2.18968		6.04718e-17	2.38318e-14	NM-172	0.0007585	7.66e-07	21.5967	1.0011	0.0007	2e-05	0.00014	0	0.00028	5e-06	0.01077	0	0.0002	0.0003	0	0	320	0	1.96	0	3
54436-01B	SCV-318-230702-djk,G2:172	0.238007	0.0026384	0.191352	1.62654	0.0550833	3.18801	0.107963	0.0569978	2.24e-05	0.0752078	0.0025478	80.5785	0.616234	10.3956	0.691812	12.8865	0.773524	14.1627	0.93882	0.938928	0.912197	0	2.18966		1.21324e-15	9.77608e-14	NM-172	0.0007581	7.66e-07	21.7349	1.0011	0.0007	2e-05	0.00014	0	0.00028	5e-06	0.01077	0	0.0002	0.0003	0	0	320	0	1.96	0	3
54436-02B	SCV-318-230702-djk,G2:172	0.443883	0.0020556	-0.0778547	-1.23423	0.0093051	-2.41909	0.0182381	0.0299612	3.89932e-06	0.104283	0.0008485	141.669	0.588549	10.3915	0.61951	7.3414	0.222042	14.1572	0.840706	0.840826	0.87031	0	2.18966		6.76885e-15	9.58938e-13	NM-172	0.0007581	7.66e-07	21.7575	1.0011	0.0007	2e-05	0.00014	0	0.00028	5e-06	0.01077	0	0.0002	0.0003	0	0	320	0	1.96	0	3
54436-03B	SCV-318-230702-djk,G2:172	0.423414	0.0033128	-0.311143	-4.70508	0.0363945	-9.22196	0.0713332	0.0376095	1.52e-05	0.102802	0.0016825	135.748	0.952328	10.2071	0.704574	7.54395	0.357392	13.9069	0.956274	0.956377	0.95885	0	2.18965		2.48489e-15	3.37318e-13	NM-172	0.0007581	7.66e-07	21.774	1.0011	0.0007	2e-05	0.00014	0	0.00028	5e-06	0.01077	0	0.0002	0.0003	0	0	320	0	1.96	0	3
54436-04B	SCV-318-230702-djk,G2:172	0.0674755	0.0008772	-2.07662	-5.00431	0.0462542	-9.80845	0.0906583	0.025797	1.92e-05	0.0319247	0.0020041	28.6148	0.150019	8.2335	0.262996	28.8746	0.858418	11.2263	0.357478	0.357657	0.357342	0	2.18965		2.432e-15	6.9591e-14	NM-172	0.0007581	7.66e-07	21.7966	1.0011	0.0007	2e-05	0.00014	0	0.00028	5e-06	0.01077	0	0.0002	0.0003	0	0	320	0	1.96	0	3
54436-05B	SCV-318-230702-djk,G2:172	0.453691	0.0022012	-0.0393352	-0.637358	0.0135889	-1.24922	0.0266342	0.0176529	5.53957e-06	0.101927	0.0008534	143.345	0.605039	9.22288	0.662994	6.43692	0.264572	12.5706	0.900507	0.900596	0.861002	0	2.18966		7.73135e-15	1.10825e-12	NM-172	0.0007581	7.66e-07	21.8136	1.0011	0.0007	2e-05	0.00014	0	0.00028	5e-06	0.01077	0	0.0002	0.0003	0	0	320	0	1.96	0	3
54436-06B	SCV-318-230702-djk,G2:172	0.257949	0.0011872	-0.23147	-2.13241	0.014661	-4.17953	0.0287355	0.020445	6.18169e-06	0.0660454	0.0007995	84.9522	0.278167	8.53937	0.434494	10.067	0.355667	11.642	0.590452	0.590568	0.590509	0	2.18966		5.07549e-15	4.31174e-13	NM-172	0.0007581	7.66e-07	21.8361	1.0011	0.0007	2e-05	0.00014	0	0.00028	5e-06	0.01077	0	0.0002	0.0003	0	0	320	0	1.96	0	3
54436-07B	SCV-318-230702-djk,G2:172	0.379717	0.0016574	-0.0595284	-0.807283	0.0064409	-1.58228	0.0126241	0.0254794	2.69018e-06	0.0907331	0.0006506	121.707	0.464091	9.42906	0.53392	7.75174	0.226693	12.8506	0.725081	0.725196	0.757911	0	2.18964		1.24652e-14	1.5171e-12	NM-172	0.0007581	7.66e-07	21.8528	1.0011	0.0007	2e-05	0.00014	0	0.00028	5e-06	0.01077	0	0.0002	0.0003	0	0	320	0	1.96	0	3
54436-08B	SCV-318-230702-djk,G2:172	0.221861	0.0022301	-0.733888	-5.81504	0.0517562	-11.3975	0.101442	0.0376751	2.15e-05	0.0649213	0.0018263	76.3747	0.591542	10.2927	0.531677	13.5315	0.592601	14.0231	0.721565	0.721703	0.760222	0	2.18966		2.00766e-15	1.53335e-13	NM-172	0.0007581	7.66e-07	21.8751	1.0011	0.0007	2e-05	0.00014	0	0.00028	5e-06	0.01077	0	0.0002	0.0003	0	0	320	0	1.96	0	3
54436-09B	SCV-318-230702-djk,G2:172	0.396049	0.0017596	-0.0029208	-0.0413139	0.0039948	-0.0809753	0.0078299	0.0297494	1.62222e-06	0.0953309	0.0006896	127.575	0.530884	10.5398	0.526659	8.26185	0.173025	14.3584	0.714622	0.714768	0.710291	0	2.18965		2.05685e-14	2.62404e-12	NM-172	0.0007581	7.66e-07	21.8919	1.0011	0.0007	2e-05	0.00014	0	0.00028	5e-06	0.01077	0	0.0002	0.0003	0	0	320	0	1.96	0	3
54436-10B	SCV-318-230702-djk,G2:172	0.462696	0.0028158	-0.141441	-2.33729	0.0295694	-4.58109	0.057956	0.0112766	1.21e-05	0.101282	0.0015435	146.13	0.779899	9.19548	0.711666	6.30296	0.305279	12.5334	0.966635	0.966718	0.967028	0	2.18966		4.85208e-15	7.09037e-13	NM-172	0.0007581	7.66e-07	21.9142	1.0011	0.0007	2e-05	0.00014	0	0.00028	5e-06	0.01077	0	0.0002	0.0003	0	0	320	0	1.96	0	3
54436-11B	SCV-318-230702-djk,G2:172	1.25934	0.0746791	0.097813	4.39927	0.506266	8.62257	0.99228	-0.132855	0.0002056	0.201588	0.0231996	395.695	23.1872	23.9942	4.42959	6.04514	0.987753	32.5229	5.95029	5.95037	5.70927	0	2.18965		3.03648e-16	1.20152e-13	NM-172	0.0007581	7.66e-07	21.9317	1.00111	0.0007	2e-05	0.00014	0	0.00028	5e-06	0.01077	0	0.0002	0.0003	0	0	320	0	1.96	0	3
54436-12B	SCV-318-230702-djk,G2:172	0.439533	0.0031239	-0.0284369	-0.446391	0.0046388	-0.874925	0.009092	0.0421343	1.91544e-06	0.107727	0.0010652	141.34	0.992439	11.419	0.590102	8.08163	0.177701	15.551	0.800179	0.800332	0.779721	0	2.18967		2.02907e-14	2.8679e-12	NM-172	0.0007581	7.66e-07	21.954	1.00111	0.0007	2e-05	0.00014	0	0.00028	5e-06	0.01077	0	0.0002	0.0003	0	0	320	0	1.96	0	3
54436-13B	SCV-318-230702-djk,G2:172	0.315085	0.0019902	-0.171236	-1.92692	0.0142899	-3.77676	0.0280082	0.0441738	5.99433e-06	0.0849633	0.001109	102.537	0.56128	9.25845	0.512965	9.0416	0.333485	12.6189	0.696712	0.696828	0.698246	0	2.18965		5.67692e-15	5.82092e-13	NM-172	0.0007581	7.66e-07	21.9704	1.00111	0.0007	2e-05	0.00014	0	0.00028	5e-06	0.01077	0	0.0002	0.0003	0	0	320	0	1.96	0	3
54436-14B	SCV-318-230702-djk,G2:172	0.584779	0.0178802	-0.890597	-18.6001	0.599654	-36.4562	1.17532	0.118082	0.0002439	0.159715	0.0129592	212.832	6.23493	37.9994	2.06379	18.0867	0.75879	51.2387	2.74369	2.74417	2.81612	0	2.18965		6.5768e-16	1.39975e-13	NM-172	0.0007581	7.66e-07	21.9931	1.00111	0.0007	2e-05	0.00014	0	0.00028	5e-06	0.01077	0	0.0002	0.0003	0	0	320	0	1.96	0	3
54436-15B	SCV-318-230702-djk,G2:172	1.16527	0.0251752	-0.346058	-14.4018	0.368284	-28.2275	0.721837	0.0846762	0.0001499	0.257442	0.0112861	359.434	7.64077	13.77	2.09799	3.86965	0.438046	18.7361	2.83986	2.83993	2.65262	0	2.18964		8.10902e-16	2.91466e-13	NM-172	0.0007581	7.66e-07	22.0105	1.00111	0.0007	2e-05	0.00014	0	0.00028	5e-06	0.01077	0	0.0002	0.0003	0	0	320	0	1.96	0	3
54436-16B	SCV-318-230702-djk,G2:172	0.235568	0.0057577	0.203898	1.71543	0.159399	3.36223	0.312423	0.0671061	6.47e-05	0.0782429	0.0072709	82.9771	1.65308	13.5268	1.08913	16.2824	1.2221	18.407	1.47453	1.47464	1.44141	0	2.1897		6.61859e-16	5.49192e-14	NM-172	0.0007581	7.66e-07	22.0336	1.00111	0.0007	2e-05	0.00014	0	0.00028	5e-06	0.01077	0	0.0002	0.0003	0	0	320	0	1.96	0	3
54436-17B	SCV-318-230702-djk,G2:172	0.217294	0.0041234	-2.3314	-18.0928	0.290134	-35.4619	0.568662	0.0747159	0.0001186	0.0758549	0.0060407	74.2532	1.0996	8.44121	0.859553	11.5122	1.10327	11.5086	1.16817	1.16823	1.16955	0	2.18969		7.76647e-16	5.76685e-14	NM-172	0.0007581	7.66e-07	22.0509	1.00111	0.0007	2e-05	0.00014	0	0.00028	5e-06	0.01077	0	0.0002	0.0003	0	0	320	0	1.96	0	3
54436-18B	SCV-318-230702-djk,G2:172	0.192973	0.0028891	-1.42897	-9.84835	0.10614	-19.3028	0.208035	0.0677282	4.38e-05	0.0695415	0.0027242	67.5653	0.679278	9.66221	0.691249	14.3992	0.957141	13.1672	0.938573	0.938667	0.978003	0	2.18968		1.35629e-15	9.16379e-14	NM-172	0.0007581	7.66e-07	22.074	1.00111	0.0007	2e-05	0.00014	0	0.00028	5e-06	0.01077	0	0.0002	0.0003	0	0	320	0	1.96	0	3
54437-01B	SCV-1014-051202-djk,G#:172	0.559441	0.0182349	0.125359	2.50467	0.262619	4.90916	0.514734	-0.005774	0.0001066	0.113941	0.0119475	178.142	5.26748	13.0566	2.86717	7.3165	1.54828	17.7571	3.88025	3.88029	3.8507	0	2.18969		2.46164e-16	4.3852e-14	NM-172	0.0007576	7.66e-07	22.0917	1.00111	0.0007	2e-05	0.00014	0	0.00028	5e-06	0.01077	0	0.0002	0.0003	0	0	320	0	1.96	0	3
54437-02B	SCV-1014-051202-djk,G#:172	0.339225	0.0175101	0.186357	2.25775	0.680715	4.42519	1.3342	0.0812206	0.0002764	0.102601	0.0309352	114.361	4.98679	14.3312	2.98506	12.5118	2.5241	19.4813	4.03594	4.03599	4.09087	0	2.18967		1.43663e-16	1.64294e-14	NM-172	0.0007576	7.66e-07	22.1147	1.00111	0.0007	2e-05	0.00014	0	0.00028	5e-06	0.01077	0	0.0002	0.0003	0	0	320	0	1.96	0	3
54437-03B	SCV-1014-051202-djk,G#:172	0.889566	0.0503014	0.144145	4.57952	0.890596	8.97587	1.74557	0.0867387	0.0003616	0.207944	0.0404407	272.601	14.5947	10.1486	5.45987	3.71095	1.94863	13.8173	7.40521	7.40522	7.93152	0	2.18969		1.13051e-16	3.08178e-14	NM-172	0.0007576	7.66e-07	22.1326	1.00111	0.0007	2e-05	0.00014	0	0.00028	5e-06	0.01077	0	0.0002	0.0003	0	0	320	0	1.96	0	3
54437-04B	SCV-1014-051202-djk,G#:172	0.158987	0.0071982	0.384368	2.18248	0.255935	4.27767	0.501633	0.168855	0.0001039	0.0989961	0.0116096	62.9131	1.57378	16.1429	1.92275	25.6199	2.97824	21.9291	2.59612	2.59621	2.76842	0	2.18966		2.25019e-16	1.41567e-14	NM-172	0.0007576	7.66e-07	22.1559	1.00111	0.0007	2e-05	0.00014	0	0.00028	5e-06	0.01077	0	0.0002	0.0003	0	0	320	0	1.96	0	3
54437-05B	SCV-1014-051202-djk,G#:172	0.787592	0.110316	0.250616	7.04939	1.64263	13.8168	3.21956	0.46518	0.0006669	0.319498	0.0744504	258.025	33.6899	26.0181	12.7823	10.0338	4.73772	35.2137	17.1322	17.1322	17.1172	0	2.18967		3.76156e-17	9.70576e-15	NM-172	0.0007576	7.66e-07	22.1738	1.00111	0.0007	2e-05	0.00014	0	0.00028	5e-06	0.01077	0	0.0002	0.0003	0	0	320	0	1.96	0	3
54437-06B	SCV-1014-051202-djk,G#:172	0.647625	0.0268991	0.152157	3.5193	0.334736	6.89783	0.656082	0.0776613	0.0001359	0.159336	0.015156	198.46	7.5914	7.39912	3.88058	3.71908	1.90685	10.0843	5.27412	5.27413	5.20431	0	2.18966		1.23315e-16	2.44733e-14	NM-172	0.0007576	7.66e-07	22.1973	1.00111	0.0007	2e-05	0.00014	0	0.00028	5e-06	0.01077	0	0.0002	0.0003	0	0	320	0	1.96	0	3
54437-07B	SCV-1014-051202-djk,G#:172	0.367399	0.0148317	0.14806	1.94275	0.201317	3.80779	0.394582	0.0232913	8.17e-05	0.0878874	0.0091078	119.659	3.85714	11.2689	2.98038	9.40474	2.443	15.3361	4.03888	4.03891	4.0386	0	2.18967		1.59523e-16	1.90883e-14	NM-172	0.0007576	7.66e-07	22.2151	1.00111	0.0007	2e-05	0.00014	0	0.00028	5e-06	0.01077	0	0.0002	0.0003	0	0	320	0	1.96	0	3
54437-08B	SCV-1014-051202-djk,G#:172	0.140944	0.0027083	0.200714	1.01034	0.0773521	1.98026	0.15161	0.0242563	3.14e-05	0.0456582	0.0034959	49.3398	0.553578	7.78059	0.704167	15.7583	1.37245	10.6027	0.956764	0.956824	0.938351	0	2.18968		6.1989e-16	3.05852e-14	NM-172	0.0007576	7.66e-07	22.2384	1.00111	0.0007	2e-05	0.00014	0	0.00028	5e-06	0.01077	0	0.0002	0.0003	0	0	320	0	1.96	0	3
54437-09B	SCV-1014-051202-djk,G#:172	0.35422	0.0093176	0.182093	2.30361	0.168494	4.51507	0.330248	0.077164	6.84e-05	0.104019	0.007609	117.488	2.46252	13.03	1.95226	11.0726	1.60389	17.7212	2.64213	2.64219	2.58786	0	2.18966		2.7651e-16	3.24867e-14	NM-172	0.0007576	7.66e-07	22.2562	1.00111	0.0007	2e-05	0.00014	0	0.00028	5e-06	0.01077	0	0.0002	0.0003	0	0	320	0	1.96	0	3
54437-10B	SCV-1014-051202-djk,G#:172	0.183844	0.0078442	0.143301	0.940892	0.299761	1.84415	0.587531	-0.0084005	0.0001217	0.0424413	0.0135218	65.6292	1.43961	11.3882	2.12402	17.341	3.1987	15.4978	2.87812	2.87817	2.87142	0	2.18964		3.13901e-16	2.06011e-14	NM-172	0.0007576	7.66e-07	22.2797	1.00111	0.0007	2e-05	0.00014	0	0.00028	5e-06	0.01077	0	0.0002	0.0003	0	0	320	0	1.96	0	3
54437-11B	SCV-1014-051202-djk,G#:172	0.647438	0.0609605	0.0261856	0.605484	0.470076	1.18675	0.921348	0.133083	0.0001909	0.178178	0.0529411	214.413	19.1538	23.1592	6.38839	10.7966	2.79543	31.3778	8.58064	8.58069	8.33288	0	2.18964		6.25388e-17	1.34091e-14	NM-172	0.0007576	7.66e-07	22.3114	1.00111	0.0007	2e-05	0.00014	0	0.00028	5e-06	0.01077	0	0.0002	0.0003	0	0	320	0	1.96	0	3
54437-12B	SCV-1014-051202-djk,G#:172	0.310934	0.008201	0.0157306	0.174685	0.0982113	0.342383	0.192494	-0.0282999	3.99e-05	0.0593631	0.0182571	99.0624	2.017	7.19562	1.78618	7.26285	1.75799	9.80773	2.42798	2.428	2.32237	0	2.18965		3.03885e-16	3.01036e-14	NM-172	0.0007576	7.66e-07	22.3258	1.00111	0.0007	2e-05	0.00014	0	0.00028	5e-06	0.01077	0	0.0002	0.0003	0	0	320	0	1.96	0	3
54437-13B	SCV-1014-051202-djk,G#:172	9.84794	1.85061	-0.0077222	-2.71598	0.80912	-5.32333	1.58587	0.954817	0.0003285	2.18744	0.435991	2904.23	545.134	-6.01977	32.2234	-0.20767	1.03698	-8.24619	44.2424	44.2424	42.5425	0	2.18965		3.01865e-17	8.76686e-14	NM-172	0.0007576	7.66e-07	22.3447	1.00111	0.0007	2e-05	0.00014	0	0.00028	5e-06	0.01077	0	0.0002	0.0003	0	0	320	0	1.96	0	3
54437-14B	SCV-1014-051202-djk,G#:172	0.290266	0.0081476	0.0718148	0.744478	0.0690691	1.45918	0.135375	0.0308759	2.8e-05	0.0759351	0.0126347	92.6093	1.66694	6.9017	1.99448	7.44863	2.1159	9.40816	2.71173	2.71175	2.77371	0	2.18967		3.13042e-16	2.89906e-14	NM-172	0.0007576	7.66e-07	22.3587	1.00111	0.0007	2e-05	0.00014	0	0.00028	5e-06	0.01077	0	0.0002	0.0003	0	0	320	0	1.96	0	3
54437-15B	SCV-1014-051202-djk,G#:172	0.209329	0.0045916	0.0414704	0.310035	0.113084	0.607668	0.221644	0.0784242	4.59e-05	0.0771101	0.006466	71.285	0.883936	9.45826	1.22915	13.2654	1.68027	12.8808	1.66796	1.66801	1.63634	0	2.18968		4.48531e-16	3.19735e-14	NM-172	0.0007576	7.66e-07	22.3768	1.00111	0.0007	2e-05	0.00014	0	0.00028	5e-06	0.01077	0	0.0002	0.0003	0	0	320	0	1.96	0	3
54437-01B	SCV-1014-051202-djk,G#:172	0.559441	0.0182349	0.125359	2.50467	0.262619	4.90916	0.514734	-0.005774	0.0001066	0.113941	0.0119475	178.142	5.26748	13.0566	2.86717	7.3165	1.54828	17.7571	3.88025	3.88029	3.97476	0	2.18969		2.46164e-16	4.3852e-14	NM-172	0.0007576	7.66e-07	22.0917	1.00111	0.0007	2e-05	0.00014	0	0.00028	5e-06	0.01077	0	0.0002	0.0003	0	0	320	0	1.96	0	3
54437-02B	SCV-1014-051202-djk,G#:172	0.339225	0.0175101	0.186357	2.25775	0.680715	4.42519	1.3342	0.0812206	0.0002764	0.102601	0.0309352	114.361	4.98679	14.3312	2.98506	12.5118	2.5241	19.4813	4.03594	4.03599	3.99635	0	2.18967		1.43663e-16	1.64294e-14	NM-172	0.0007576	7.66e-07	22.1147	1.00111	0.0007	2e-05	0.00014	0	0.00028	5e-06	0.01077	0	0.0002	0.0003	0	0	320	0	1.96	0	3
54437-03B	SCV-1014-051202-djk,G#:172	0.889566	0.0503014	0.144145	4.57952	0.890596	8.97587	1.74557	0.0867387	0.0003616	0.207944	0.0404407	272.601	14.5947	10.1486	5.45987	3.71095	1.94863	13.8173	7.40521	7.40522	7.80257	0	2.18969		1.13051e-16	3.08178e-14	NM-172	0.0007576	7.66e-07	22.1326	1.00111	0.0007	2e-05	0.00014	0	0.00028	5e-06	0.01077	0	0.0002	0.0003	0	0	320	0	1.96	0	3
54437-04B	SCV-1014-051202-djk,G#:172	0.158987	0.0071982	0.384368	2.18248	0.255935	4.27767	0.501633	0.168855	0.0001039	0.0989961	0.0116096	62.9131	1.57378	16.1429	1.92275	25.6199	2.97824	21.9291	2.59612	2.59621	2.62636	0	2.18966		2.25019e-16	1.41567e-14	NM-172	0.0007576	7.66e-07	22.1559	1.00111	0.0007	2e-05	0.00014	0	0.00028	5e-06	0.01077	0	0.0002	0.0003	0	0	320	0	1.96	0	3
54437-05B	SCV-1014-051202-djk,G#:172	0.787592	0.110316	0.250616	7.04939	1.64263	13.8168	3.21956	0.46518	0.0006669	0.319498	0.0744504	258.025	33.6899	26.0181	12.7823	10.0338	4.73772	35.2137	17.1322	17.1322	18.0688	0	2.18967		3.76156e-17	9.70576e-15	NM-172	0.0007576	7.66e-07	22.1738	1.00111	0.0007	2e-05	0.00014	0	0.00028	5e-06	0.01077	0	0.0002	0.0003	0	0	320	0	1.96	0	3
54437-06B	SCV-1014-051202-djk,G#:172	0.647625	0.0268991	0.152157	3.5193	0.334736	6.89783	0.656082	0.0776613	0.0001359	0.159336	0.015156	198.46	7.5914	7.39912	3.88058	3.71908	1.90685	10.0843	5.27412	5.27413	5.40177	0	2.18966		1.23315e-16	2.44733e-14	NM-172	0.0007576	7.66e-07	22.1973	1.00111	0.0007	2e-05	0.00014	0	0.00028	5e-06	0.01077	0	0.0002	0.0003	0	0	320	0	1.96	0	3
54437-07B	SCV-1014-051202-djk,G#:172	0.367399	0.0148317	0.14806	1.94275	0.201317	3.80779	0.394582	0.0232913	8.17e-05	0.0878874	0.0091078	119.659	3.85714	11.2689	2.98038	9.40474	2.443	15.3361	4.03888	4.03891	3.91415	0	2.18967		1.59523e-16	1.90883e-14	NM-172	0.0007576	7.66e-07	22.2151	1.00111	0.0007	2e-05	0.00014	0	0.00028	5e-06	0.01077	0	0.0002	0.0003	0	0	320	0	1.96	0	3
54437-08B	SCV-1014-051202-djk,G#:172	0.140944	0.0027083	0.200714	1.01034	0.0773521	1.98026	0.15161	0.0242563	3.14e-05	0.0456582	0.0034959	49.3398	0.553578	7.78059	0.704167	15.7583	1.37245	10.6027	0.956764	0.956824	0.923295	0	2.18968		6.1989e-16	3.05852e-14	NM-172	0.0007576	7.66e-07	22.2384	1.00111	0.0007	2e-05	0.00014	0	0.00028	5e-06	0.01077	0	0.0002	0.0003	0	0	320	0	1.96	0	3
54437-09B	SCV-1014-051202-djk,G#:172	0.35422	0.0093176	0.182093	2.30361	0.168494	4.51507	0.330248	0.077164	6.84e-05	0.104019	0.007609	117.488	2.46252	13.03	1.95226	11.0726	1.60389	17.7212	2.64213	2.64219	2.71123	0	2.18966		2.7651e-16	3.24867e-14	NM-172	0.0007576	7.66e-07	22.2562	1.00111	0.0007	2e-05	0.00014	0	0.00028	5e-06	0.01077	0	0.0002	0.0003	0	0	320	0	1.96	0	3
54437-10B	SCV-1014-051202-djk,G#:172	0.183844	0.0078442	0.143301	0.940892	0.299761	1.84415	0.587531	-0.0084005	0.0001217	0.0424413	0.0135218	65.6292	1.43961	11.3882	2.12402	17.341	3.1987	15.4978	2.87812	2.87817	2.82352	0	2.18964		3.13901e-16	2.06011e-14	NM-172	0.0007576	7.66e-07	22.2797	1.00111	0.0007	2e-05	0.00014	0	0.00028	5e-06	0.01077	0	0.0002	0.0003	0	0	320	0	1.96	0	3
54437-11B	SCV-1014-051202-djk,G#:172	0.647438	0.0609605	0.0261856	0.605484	0.470076	1.18675	0.921348	0.133083	0.0001909	0.178178	0.0529411	214.413	19.1538	23.1592	6.38839	10.7966	2.79543	31.3778	8.58064	8.58069	7.97776	0	2.18964		6.25388e-17	1.34091e-14	NM-172	0.0007576	7.66e-07	22.3114	1.00111	0.0007	2e-05	0.00014	0	0.00028	5e-06	0.01077	0	0.0002	0.0003	0	0	320	0	1.96	0	3
54437-12B	SCV-1014-051202-djk,G#:172	0.310934	0.008201	0.0157306	0.174685	0.0982113	0.342383	0.192494	-0.0282999	3.99e-05	0.0593631	0.0182571	99.0624	2.017	7.19562	1.78618	7.26285	1.75799	9.80773	2.42798	2.428	2.41138	0	2.18965		3.03885e-16	3.01036e-14	NM-172	0.0007576	7.66e-07	22.3258	1.00111	0.0007	2e-05	0.00014	0	0.00028	5e-06	0.01077	0	0.0002	0.0003	0	0	320	0	1.96	0	3
54437-13B	SCV-1014-051202-djk,G#:172	9.84794	1.85061	-0.0077222	-2.71598	0.80912	-5.32333	1.58587	0.954817	0.0003285	2.18744	0.435991	2904.23	545.134	-6.01977	32.2234	-0.20767	1.03698	-8.24619	44.2424	44.2424	43.9618	0	2.18965		3.01865e-17	8.76686e-14	NM-172	0.0007576	7.66e-07	22.3447	1.00111	0.0007	2e-05	0.00014	0	0.00028	5e-06	0.01077	0	0.0002	0.0003	0	0	320	0	1.96	0	3
54437-14B	SCV-1014-051202-djk,G#:172	0.290266	0.0081476	0.0718148	0.744478	0.0690691	1.45918	0.135375	0.0308759	2.8e-05	0.0759351	0.0126347	92.6093	1.66694	6.9017	1.99448	7.44863	2.1159	9.40816	2.71173	2.71175	2.75387	0	2.18967		3.13042e-16	2.89906e-14	NM-172	0.0007576	7.66e-07	22.3587	1.00111	0.0007	2e-05	0.00014	0	0.00028	5e-06	0.01077	0	0.0002	0.0003	0	0	320	0	1.96	0	3
54437-15B	SCV-1014-051202-djk,G#:172	0.209329	0.0045916	0.0414704	0.310035	0.113084	0.607668	0.221644	0.0784242	4.59e-05	0.0771101	0.006466	71.285	0.883936	9.45826	1.22915	13.2654	1.68027	12.8808	1.66796	1.66801	1.6778	0	2.18968		4.48531e-16	3.19735e-14	NM-172	0.0007576	7.66e-07	22.3768	1.00111	0.0007	2e-05	0.00014	0	0.00028	5e-06	0.01077	0	0.0002	0.0003	0	0	320	0	1.96	0	3
54445-01B	SCV-1154-160103-djkbi,G12:172	0.291323	0.0015103	0.0277799	0.289033	0.0141128	0.566505	0.0276612	0.0188745	5.73427e-06	0.0719589	0.0011661	92.8819	0.255644	6.8217	0.534725	7.34302	0.435396	9.28352	0.725828	0.725889	0.725128	0	2.18972		5.62763e-15	5.22705e-13	NM-172	0.0007563	7.66e-07	22.9258	1.00112	0.0007	2e-05	0.00014	0	0.00028	5e-06	0.01077	0	0.0002	0.0003	0	0	320	0	1.96	0	3
54445-02B	SCV-1154-160103-djkbi,G12:172	0.270577	0.0009296	0.0120357	0.116306	0.003667	0.227961	0.0071874	0.0105212	1.49159e-06	0.0651725	0.0010056	86.5037	0.195566	6.5585	0.422387	7.58116	0.312127	8.92622	0.573455	0.573526	0.573805	0	2.18972		8.34646e-15	7.21999e-13	NM-172	0.0007563	7.66e-07	22.9391	1.00112	0.0007	2e-05	0.00014	0	0.00028	5e-06	0.01077	0	0.0002	0.0003	0	0	320	0	1.96	0	3
54445-03B	SCV-1154-160103-djkbi,G12:172	0.365365	0.0013374	0.020756	0.27084	0.0100035	0.530846	0.0196068	0.0122159	4.06693e-06	0.0835532	0.0025768	115.177	0.274923	7.23554	0.557678	6.28093	0.300615	9.84517	0.756748	0.756813	0.75092	0	2.18971		6.16704e-15	7.10301e-13	NM-172	0.0007563	7.66e-07	22.9527	1.00112	0.0007	2e-05	0.00014	0	0.00028	5e-06	0.01077	0	0.0002	0.0003	0	0	320	0	1.96	0	3
54445-04B	SCV-1154-160103-djkbi,G12:172	0.31305	0.0011077	0.0539746	0.603455	0.0051834	1.18277	0.0101595	0.009469	2.15678e-06	0.0728173	0.0017297	98.7258	0.228198	6.2723	0.471066	6.35059	0.289191	8.53762	0.639682	0.639741	0.638711	0	2.18973		1.01857e-14	1.00559e-12	NM-172	0.0007563	7.66e-07	22.9709	1.00112	0.0007	2e-05	0.00014	0	0.00028	5e-06	0.01077	0	0.0002	0.0003	0	0	320	0	1.96	0	3
54445-05B	SCV-1154-160103-djkbi,G12:172	0.166471	0.0008071	0.0417947	0.248486	0.0066543	0.487032	0.0130424	0.0147827	2.70862e-06	0.0471201	0.0013998	57.3546	0.139923	8.18474	0.301361	14.268	0.38591	11.1327	0.408643	0.408798	0.384629	0	2.18972		7.4128e-15	4.25158e-13	NM-172	0.0007563	7.66e-07	22.9846	1.00112	0.0007	2e-05	0.00014	0	0.00028	5e-06	0.01077	0	0.0002	0.0003	0	0	320	0	1.96	0	3
54445-06B	SCV-1154-160103-djkbi,G12:172	0.183656	0.0012974	0.0289229	0.189709	0.0114561	0.37183	0.0224539	0.0177264	4.65354e-06	0.0513546	0.0018115	60.2336	0.220905	5.9802	0.410277	9.92707	0.571958	8.14092	0.557257	0.557318	0.550789	0	2.1897		3.29406e-15	1.98413e-13	NM-172	0.0007563	7.66e-07	22.9985	1.00112	0.0007	2e-05	0.00014	0	0.00028	5e-06	0.01077	0	0.0002	0.0003	0	0	320	0	1.96	0	3
54445-07B	SCV-1154-160103-djkbi,G12:172	0.396056	0.0015416	0.0052568	0.0743573	0.0058738	0.14574	0.0115127	0.0096508	2.38549e-06	0.0884112	0.001053	123.023	0.342585	5.99522	0.603754	4.873	0.306029	8.16131	0.820036	0.820077	0.795246	0	2.1897		6.27964e-15	7.72541e-13	NM-172	0.0007563	7.66e-07	23.0174	1.00112	0.0007	2e-05	0.00014	0	0.00028	5e-06	0.01077	0	0.0002	0.0003	0	0	320	0	1.96	0	3
54445-08B	SCV-1154-160103-djkbi,G12:172	0.448011	0.0015409	0.0083605	0.133772	0.0132609	0.262193	0.0259914	0.0051044	5.38494e-06	0.0965961	0.0014527	138.033	0.311617	5.65755	0.658793	4.09832	0.280811	7.70263	0.89502	0.895054	0.90096	0	2.1897		8.87497e-15	1.22504e-12	NM-172	0.0007563	7.66e-07	23.0314	1.00112	0.0007	2e-05	0.00014	0	0.00028	5e-06	0.01077	0	0.0002	0.0003	0	0	320	0	1.96	0	3
54445-09B	SCV-1154-160103-djkbi,G12:172	0.181457	0.001909	0.0121298	0.0786086	0.0221241	0.154073	0.0433632	0.0176256	8.98258e-06	0.0508984	0.002259	128.291	0.626595	74.6818	0.700628	58.2096	0.42909	99.1213	0.904823	0.910081	0.902052	0	2.18971		1.60019e-15	2.05291e-13	NM-172	0.0007563	7.66e-07	23.0447	1.00112	0.0007	2e-05	0.00014	0	0.00028	5e-06	0.01077	0	0.0002	0.0003	0	0	320	0	1.96	0	3
54445-10B	SCV-1154-160103-djkbi,G12:172	0.120044	0.0009838	0.038677	0.165819	0.0119443	0.325006	0.0234108	0.0068338	4.85111e-06	0.0356621	0.0011581	42.286	0.120586	6.82753	0.323768	16.1443	0.680493	9.29143	0.439476	0.439576	0.426811	0	2.1897		4.68814e-15	1.98243e-13	NM-172	0.0007563	7.66e-07	23.0639	1.00112	0.0007	2e-05	0.00014	0	0.00028	5e-06	0.01077	0	0.0002	0.0003	0	0	320	0	1.96	0	3
54445-11B	SCV-1154-160103-djkbi,G12:172	0.159219	0.0007767	0.0519731	0.29554	0.0039745	0.579257	0.00779	0.0087174	1.63011e-06	0.043672	0.0009651	53.425	0.12184	6.40161	0.29433	11.98	0.414551	8.7132	0.399645	0.399742	0.369755	0	2.18971		1.21875e-14	6.51117e-13	NM-172	0.0007563	7.66e-07	23.0778	1.00112	0.0007	2e-05	0.00014	0	0.00028	5e-06	0.01077	0	0.0002	0.0003	0	0	320	0	1.96	0	3
54445-12B	SCV-1154-160103-djkbi,G12:172	0.0873473	0.0004741	0.0486267	0.151693	0.0035321	0.297318	0.0069229	0.0107353	1.43893e-06	0.0308717	0.0010294	32.8194	0.0848657	7.0217	0.179861	21.3928	0.433877	9.55497	0.244104	0.244295	0.244954	0	2.1897		8.45412e-15	2.77459e-13	NM-172	0.0007563	7.66e-07	23.0913	1.00112	0.0007	2e-05	0.00014	0	0.00028	5e-06	0.01077	0	0.0002	0.0003	0	0	320	0	1.96	0	3
54445-13B	SCV-1154-160103-djkbi,G12:172	0.110244	0.0005586	0.0350147	0.137863	0.0040038	0.270211	0.0078475	0.0131686	1.62912e-06	0.0360055	0.0008241	39.0902	0.0943302	6.5254	0.213416	16.6917	0.420048	8.88128	0.289752	0.289891	0.295714	0	2.1897		9.16956e-15	3.5844e-13	NM-172	0.0007563	7.66e-07	23.1097	1.00112	0.0007	2e-05	0.00014	0	0.00028	5e-06	0.01077	0	0.0002	0.0003	0	0	320	0	1.96	0	3
54445-14B	SCV-1154-160103-djkbi,G12:172	0.0717876	0.0012051	0.0078772	0.0201958	0.0174006	0.0395839	0.0341051	0.0061033	7.06464e-06	0.0263448	0.0022001	28.893	0.211225	7.6816	0.386921	26.5861	1.30161	10.4504	0.524861	0.524967	0.532766	0	2.18971		1.87015e-15	5.40344e-14	NM-172	0.0007563	7.66e-07	23.1234	1.00113	0.0007	2e-05	0.00014	0	0.00028	5e-06	0.01077	0	0.0002	0.0003	0	0	320	0	1.96	0	3
54445-15B	SCV-1154-160103-djkbi,G12:172	0.0816591	0.0007516	0.010737	0.0313132	0.0078532	0.0613739	0.0153924	0.0092866	3.18851e-06	0.0292954	0.0015985	31.8133	0.11952	7.6859	0.245356	24.159	0.697256	10.4562	0.332826	0.332994	0.30519	0	2.18971		4.14004e-15	1.31708e-13	NM-172	0.0007563	7.66e-07	23.1374	1.00113	0.0007	2e-05	0.00014	0	0.00028	5e-06	0.01077	0	0.0002	0.0003	0	0	320	0	1.96	0	3
--- Atmospheric argon ratios and discrimination ---
(40Ar/36Ar)atm	295.5 ± 0.5
(40Ar/38Ar)atm	1575 ± 2
Source of spectrometer discrimination value and error	Data file
Source of spectrometer sensitivity value and error	Saved with run
--- Source of J and use of J Adjustment Table ---
Use J saved with run	FALSE
J adjustment table useage	Use as J
--- Minor irradiation parameters (see also Irradiation Data File) ---
(38Ar/37Ar)Ca	0.00014 ± 0
(38Ar/39Ar)K	0.01077 ± 0
P(36Cl/38Cl)	320 ± 0
--- Decay constants ---
Lambda 40K epsilon	5.810000e-11 ± 5.810000e-11
Lambda 40K Beta	4.962000e-10 ± 4.962000e-10
Lambda 37Ar	0.01975 ± 0
Lambda 39Ar	7.068000e-6 ± 0
Lambda 36Cl	6.308000e-9 ± 0
--- Calculation options ---
Normalize gain	FALSE
Always calculate without ratios	FALSE
Calc. %40Ar* as %40*/(40*+40Atm)	TRUE
Number of trials in Monte Carlo sim.	1000
37Ar/39Ar calculation	Normal
H35Cl Correction	FALSE
--- Isotope curve fitting ---
Parabolic vs. Linear probability cutoff	0.05
Error envelope as 1 or 2 sigma	2
Delete outliers within cycles before fit	TRUE
Average cycles before fit	FALSE
Delete outliers after fit	TRUE
Number of iterations of deleting outliers after fit	1
Cutoff for detecting outliers, sigma	2
Method of centroid location is	mean
--- Files ---
Irradiation data file	Macintosh HD:Users:mcintosh:KAr:Aux.Data:Irradiation Data pre and#142B57
J Adjustment table	Macintosh HD:Users:mcintosh:Desktop: Kelley 2008:J-Adjustment:J-Adjustment Jemez 28.02
Run data file #1	Macintosh HD:Users:mcintosh:Desktop: Koning 2008:MS data koning:MS Lookup Table
[truncated: 88 more columns]
