# Supplementary material
Source: publisher figshare collection journal article supplement (https://gsapubs.figshare.com/ndownloader/files/23295149)
Supplement: Supplementary file 1 [file 23295149 › 2013139-App_C_groundmass_data.XLS]

## Sheet: Koning step 1.Spectra.Summary
GSA DR Item 2013139 accompanies Koning, D.J., Grauch, V.J.S., Connell, S.D., Ferguson, J., McIntosh, W., Slate, J.L., Wan, E., and Baldridge, W.S., 2013, Structure
and tectonic evolution of the eastern Española Basin, Rio Grande rift, north-central New Mexico, in Hudson, M.R., and Grauch, V.J.S., eds., New Perspectives on Rio Grande
Rift Basins: From Tectonics to Groundwater: Geological Society of America Special Paper 494, p. 185–219, https://doi.org/10.1130/2013.2494(08).
Appendix C. Summary of 40Ar/39Ar results for groundmass concentrate from basalts
									Preferred Age							Isochron Age									Integrated Age
Sample	Unit	UTM coord (zone 13; NAD 27) m	Lab #	Irradation	min	analysis	n	%39Ar	MSWD	K/Ca	±	2s	Age(Ma)	±	2s	40Ar/36Ar	±	2s	Age(Ma)	±	2s		n	MSWD	K/Ca	±	2s	Age(Ma)	±	2s
ML-767-190404-djk	2.5-3.0 m-wide basalt dike	390,330 E 3,998,450 N	55542-01	NM-187J	Groundmass Concentrate	Plateau	7	95.3303	2.38	0.12	±	0.1	10.1309	±	0.411828	299.7	±	2.5	9.2774	±	0.563128		9		0.0665098			12.7017	±	2.09
V-63-061103-djk	Lower of two flows located on NE part of Black Mesa	412,130 E 4,007,050 N	55545-01	NM-187J	Groundmass Concentrate	Plateau	6	79.1933	1.64	0.018	±	0.021	3.52931	±	0.251837	286.1	±	7.8	3.92395	±	0.31201		9		0.0127157			12.5349	±	3.4437
120304cl-djk	Lowermost Lobato Fm basalt flow interbedded in Vallito Mbr (Chamita Fm)	396,250 E 3,990,570 N	55546-01	NM-187J	Groundmass Concentrate	Plateau	4	77.3512	2.29	0.17	±	0.18	9.97844	±	0.474456	297.7	±	1.3	9.52621	±	0.424899		9		0.103415			14.0509	±	3.19444
110604c-djk	Top of 18 m-thick Servilleta Basalt at south tip of Black Mesa	400,970 E 3,996,100 N	55547-01	NM-187J	Groundmass Concentrate	Plateau	7	96.0724	1.18	0.09	±	0.16	3.34402	±	0.32466	295.6	±	2.8	3.31411	±	0.657249		9		0.0313992			3.11372	±	2.62844
120304a-djk	Bomb found in silty sand of the Vallito Mbr, lowermost Chamita Fm	394,620 E 3,989,680 N	55548-01	NM-187K	Groundmass Concentrate	Plateau	5	62.1739	3.94	0.23	±	0.13	10.152	±	0.280162	297.9	±	3.8	9.96962	±	0.332732		9		0.0994979			11.7288	±	1.09876
SCV-1584-040603-djk	Servilleta Basalt from footwall of La Mesita fault; upper flow.	414,595 E 4,004,755 N	55549-01	NM-187K	Groundmass Concentrate	Plateau	7	95.055	1.43	0.09	±	0.16	4.83554	±	0.303422	297.2	±	2.4	4.59248	±	0.503896		9		0.0301576			5.00813	±	1.11322
Sample preparation and irradiation:
Neutron flux monitor Fish Canyon Tuff sanidine (FC-2). Assigned age = 28.02 Ma (Renne et al, 1998).
Instrumentation:
Analyses performed on a Mass Analyzer Products 215-50 mass spectrometer on line with automated all-metal extraction system.
Biotite and groundmass concentrates step-heated, using a Mo double-vacuum resistance furnace.
Sanidine, biotite and flux monitor fused or step-heated by a 50 watt Synrad CO2 laser.
Notes:
Fm = Formation; Mbr = Member
Any use of trade names is for descriptive purposes only and does not imply endorsement by the U.S. Government.
Reference:
Renne, P.R., C.C. Swisher, A.L. Deino, D.B. Karner, T.L. Owens and D.J. Depaolo, 1998, Intercalibration of standards: absolute ages and uncertainties in 40Ar/39Ar dating:
Chemical Geology, v. 145, p.117-152.

## Sheet: Koning step 1.Spectra
Table 1. 40Ar/39Ar analytical data.
	ID	Temp	40Ar/39Ar	37Ar/39Ar	36Ar/39Ar	39ArK	K/Ca	40Ar*	39Ar	Age	±1s	Dur Heating At Req Pwr	Comment	Irrad.	Ar40_Disc	Ar40_DiscEr				Run_ID	Sample	Ar36_Over_Ar39	Ar36_Over_Ar39_Er	PctAr36Ca	Ar37_Over_Ar39	Ar37_Over_Ar39_Er	Ca_Over_K	Ca_Over_K_Er	Cl_Over_K	Cl_Over_K_Er	Ar38_Over_Ar39	Ar38_Over_Ar39_Er	Ar40_Over_Ar39	Ar40_Over_Ar39_Er	Ar40Rad_Over_Ar39	Ar40Rad_Over_Ar39_Er	PctAr40Rad	PctAr40Rad_Er	Age	Age_Er	Age_Er_with_J_er	Age_Monte_Carlo	Age_Er_with_external_error	EMV_Axial	EMV_Off_axis	Ar39_Moles	Ar40_Moles	Irrad	J
		(°C)			(x 10-3)	(x 10-15 mol)		(%)	(%)	(Ma)	(Ma)
	ML-767-190404-djk, Groundmass Concentrate, 76.18 mg, J=0.0007497±0.11%, D=1.0055±0.001, NM-187J, Lab#=55542-01
xi	A	625	17194.3	3.49865	57456	0.317391	0.145829	1.25833	0.71918	271.807	83.9425	304	Groundmass Concentrate, 76.18 mg; Automated furnace analysis	NM-187J	1.0055	0.001				55542-01A	ML-767-190404-djk	57.456	1.81975	0.001705	3.49865	0.116072	6.85735	0.227501	5.5427	0.0001209	10.8993	0.345728	17194.3	544.999	216.893	72.1558	1.25833	0.135544	271.807	83.9425	83.943	87.9422	0	0.00075		0.0096198	165.406	NM-187J	0.0007497
	B	700	173.473	4.10049	559.451	2.7034	0.124425	4.8968	6.84485	11.4856	1.11308	454	Groundmass Concentrate, 76.18 mg; Automated furnace analysis ; Det. IC= 22.44735	NM-187J	1.0055	0.001				55542-01B	ML-767-190404-djk	0.559451	0.0024036	0.205226	4.10049	0.0622108	8.03696	0.121933	0.130572	6.52e-05	0.120304	0.0009874	173.473	0.616039	8.51908	0.828228	4.8968	0.281836	11.4856	1.11308	1.11316	1.14965	0	0.00079	0	0.0819055	14.2084	NM-187J	0.0007497
	C	750	63.8195	4.49728	191.539	0.95004	0.113447	11.8957	8.99756	10.2712	0.579876	395	Groundmass Concentrate, 76.18 mg; Automated furnace analysis	NM-187J	1.0055	0.001				55542-01C	ML-767-190404-djk	0.191539	0.0013771	0.657431	4.49728	0.0197834	8.81466	0.0387755	0.0243466	2.25e-05	0.0492173	0.000778	63.8195	0.2644	7.61578	0.431186	11.8957	0.565948	10.2712	0.579876	0.579992	0.562208	0	0.00078		0.0287973	1.83783	NM-187J	0.0007497
	D	800	118.701	5.38799	373.401	6.67261	0.0946929	7.41935	24.1171	11.917	0.677925	462	Groundmass Concentrate, 76.18 mg; Automated furnace analysis ; Det. IC= 22.3725	NM-187J	1.0055	0.001				55542-01D	ML-767-190404-djk	0.373401	0.0010659	0.404026	5.38799	0.0285935	10.5604	0.0560433	0.0236409	3.16e-05	0.0832875	0.0004621	118.701	0.265512	8.84019	0.504554	7.41935	0.194256	11.917	0.677925	0.678059	0.701155	0	0.0008	0	0.202304	24.0137	NM-187J	0.0007497
	E	875	85.67	5.14605	263.782	9.81689	0.0991449	9.51104	46.3613	11.0265	0.467822	454	Groundmass Concentrate, 76.18 mg; Automated furnace analysis ; Det. IC= 22.53622	NM-187J	1.0055	0.001				55542-01E	ML-767-190404-djk	0.263782	0.0005943	0.546243	5.14605	0.0229911	10.0862	0.0450626	0.0591405	2.6e-05	0.0634137	0.0003866	85.67	0.150935	8.17756	0.348011	9.51104	0.163896	11.0265	0.467822	0.467989	0.471047	0	2.12489	0	1.68046e-14	1.43965e-12	NM-187J	0.0007497
	F	975	42.2048	2.8722	118.721	9.92894	0.177635	17.4399	68.8595	9.94775	0.240982	443	Groundmass Concentrate, 76.18 mg; Automated furnace analysis ; Det. IC= 22.39025	NM-187J	1.0055	0.001				55542-01F	ML-767-190404-djk	0.118721	0.000359	0.677401	2.8722	0.0109781	5.62951	0.0215171	0.0059905	1.28e-05	0.0352699	0.0002961	42.2048	0.0680042	7.37531	0.179158	17.4399	0.243594	9.94775	0.240982	0.241245	0.234657	0	2.1249	0	1.69679e-14	7.16129e-13	NM-187J	0.0007497
	G	1075	36.0553	3.08705	98.192	5.68142	0.165272	20.2328	81.7331	9.86095	0.223984	427	Groundmass Concentrate, 76.18 mg; Automated furnace analysis ; Det. IC= 22.1387	NM-187J	1.0055	0.001				55542-01G	ML-767-190404-djk	0.098192	0.0004037	0.88029	3.08705	0.0263034	6.05062	0.0515546	0.0439874	2.8e-05	0.0321401	0.0002297	36.0553	0.0751806	7.31078	0.166513	20.2328	0.311658	9.86095	0.223984	0.224262	0.22246	0	2.12491	0	9.70987e-15	3.50092e-13	NM-187J	0.0007497
	H	1250	54.2284	19.7628	164.255	6.31817	0.0258164	13.5101	96.0495	10.0201	0.340235	426	Groundmass Concentrate, 76.18 mg; Automated furnace analysis ; Det. IC= 22.30849	NM-187J	1.0055	0.001				55542-01H	ML-767-190404-djk	0.164254	0.0005195	3.3689	19.7628	0.0417745	38.735	0.081878	0.0249424	5.88e-05	0.0434742	0.0003658	54.2284	0.0951505	7.4291	0.252958	13.5101	0.285482	10.0201	0.340235	0.340424	0.335913	0	2.12491	0	1.09259e-14	5.92495e-13	NM-187J	0.0007497
xi	I	1700	86.449	35.9514	272.621	1.74344	0.0141915	10.2536	100	12.2566	0.564747	430	Groundmass Concentrate, 76.18 mg; Automated furnace analysis ; Det. IC= 22.16151	NM-187J	1.0055	0.001				55542-01I	ML-767-190404-djk	0.272621	0.0010903	3.69245	35.9514	0.169083	70.4647	0.331404	0.0733833	0.00019	0.0640633	0.0007949	86.449	0.284129	9.09295	0.420399	10.2536	0.294107	12.2566	0.564747	0.564917	0.545311	0	2.12494	0	3.04923e-15	2.63603e-13	NM-187J	0.0007497
	Integrated age ± 2s			n=9		44.1323	0.0665098		K2O=0.30%	12.7017	2.09			NM-187J
	Plateau ± 2s		steps B-H	n=7	MSWD=2.38	42.0715	0.12 ±0.10		95.3303	10.1309	0.411828			NM-187J
	Isochron±2s		steps B-H	n=7	MSWD=0.38		40Ar/36Ar=	299.7±2.5		9.2774	0.563128
	V-63-061103-djk, Groundmass Concentrate, 114.61 mg, J=0.0007402±0.15%, D=1.0055±0.001, NM-187J, Lab#=55545-01
xi	A	625	384813	14.3817	1287376	0.0172886	0.035476	1.14211	0.148087	2625.68	932.27	318	Groundmass Concentrate, 114.61 mg; Automated furnace analysis	NM-187J	1.0055	0.001				55545-01A	V-63-061103-djk	1287.38	721.955	0.0003128	14.3817	8.07117	28.1881	15.8195	199.373	0.0083941	245.383	137.611	384813	215802	4439.7	2992.38	1.14211	0.135736	2625.68	932.27	932.273	957.803	0	0.00093		0.0005257	202.303	NM-187J	0.0007402
xi	B	700	40.9268	9.85616	129.433	1.5853	0.051765	8.53946	13.7271	4.69336	0.446967	454	Groundmass Concentrate, 114.61 mg; Automated furnace analysis ; Det. IC= 22.86205	NM-187J	1.0055	0.001				55545-01B	V-63-061103-djk	0.129433	0.0011032	2.13217	9.85616	0.1515	19.3181	0.29694	0.175275	0.0001588	0.0402444	0.0007221	40.9268	0.168539	3.51921	0.335584	8.53946	0.722486	4.69336	0.446967	0.447022	0.446821	0	0.00095	0	0.0480678	1.96726	NM-187J	0.0007402
	C	750	18.8998	14.6049	61.8566	0.266506	0.0349338	9.68075	16.0099	2.46682	0.661343	396	Groundmass Concentrate, 114.61 mg; Automated furnace analysis	NM-187J	1.0055	0.001				55545-01C	V-63-061103-djk	0.0618566	0.001725	6.61104	14.6049	0.167703	28.6256	0.328697	0.2197	0.0001768	0.0282224	0.0016572	18.8998	0.220981	1.84854	0.495925	9.68075	2.56838	2.46682	0.661343	0.661353	0.66839	0	0.0009		0.0081165	0.153401	NM-187J	0.0007402
	D	800	11.1309	21.7307	35.4308	2.24311	0.0234785	22.0924	35.2235	3.33144	0.206792	462	Groundmass Concentrate, 114.61 mg; Automated furnace analysis ; Det. IC= 22.34983	NM-187J	1.0055	0.001				55545-01D	V-63-061103-djk	0.0354308	0.0004593	17.1732	21.7307	0.0961174	42.5922	0.18839	-0.0014603	0.000109	0.0187147	0.0003548	11.1309	0.0374527	2.49706	0.155143	22.0924	1.32636	3.33144	0.206792	0.206852	0.192785	0	0.00094	0	0.0686011	0.763592	NM-187J	0.0007402
	E	875	8.65576	25.9723	27.9296	2.20032	0.0196442	29.4776	54.0705	3.46699	0.188797	455	Groundmass Concentrate, 114.61 mg; Automated furnace analysis ; Det. IC= 22.26964	NM-187J	1.0055	0.001				55545-01E	V-63-061103-djk	0.0279296	0.0003837	26.0377	25.9723	0.114138	50.9057	0.223711	0.0864964	0.0001296	0.0188222	0.0004629	8.65576	0.0265637	2.59876	0.141653	29.4776	1.56984	3.46699	0.188797	0.188868	0.197481	0	2.12508	0	3.8165e-15	3.30347e-14	NM-187J	0.0007402
	F	975	8.91404	31.0402	29.3481	2.46931	0.0164369	31.5227	75.2216	3.83161	0.167858	445	Groundmass Concentrate, 114.61 mg; Automated furnace analysis ; Det. IC= 22.15368	NM-187J	1.0055	0.001				55545-01F	V-63-061103-djk	0.0293481	0.0002733	29.6144	31.0402	0.135473	60.8388	0.265528	0.0692722	0.000154	0.0185461	0.000267	8.91404	0.031114	2.87236	0.125968	31.5227	1.33745	3.83161	0.167858	0.167955	0.171659	0	2.12506	0	4.2993e-15	3.83241e-14	NM-187J	0.0007402
	G	1075	15.2808	36.7062	53.4217	1.44151	0.0138997	16.5686	87.569	3.46677	0.274256	434	Groundmass Concentrate, 114.61 mg; Automated furnace analysis ; Det. IC= 22.32897	NM-187J	1.0055	0.001				55545-01G	V-63-061103-djk	0.0534217	0.0005648	19.2389	36.7062	0.202908	71.9441	0.397699	0.10291	0.0002235	0.0234737	0.0005265	15.2808	0.0592004	2.59859	0.205772	16.5686	1.25788	3.46677	0.274256	0.274305	0.27184	0	2.12506	0	2.52e-15	3.85077e-14	NM-187J	0.0007402
	H	1250	40.97	150.224	175.37	0.624769	0.00339629	3.85103	92.9205	2.35298	1.03766	427	Groundmass Concentrate, 114.61 mg; Automated furnace analysis ; Det. IC= 22.03406	NM-187J	1.0055	0.001				55545-01H	V-63-061103-djk	0.17537	0.0020315	23.9851	150.224	1.02542	294.439	2.00983	0.282503	0.0011081	0.0450811	0.0012573	40.97	0.262942	1.76318	0.778068	3.85103	1.64749	2.35298	1.03766	1.03767	1.00175	0	2.12506	0	1.18921e-15	4.87218e-14	NM-187J	0.0007402
xi	I	1700	46.2797	128.599	177.996	0.82651	0.00396739	9.33953	100	6.33178	0.922025	428	Groundmass Concentrate, 114.61 mg; Automated furnace analysis ; Det. IC= 22.06215	NM-187J	1.0055	0.001				55545-01I	V-63-061103-djk	0.177996	0.0017158	20.2296	128.599	0.558742	252.055	1.09513	0.152309	0.0006356	0.0439704	0.001309	46.2797	0.188805	4.74989	0.692888	9.33953	1.303	6.33178	0.922025	0.922073	0.93747	0	2.12504	0	1.54729e-15	7.16083e-14	NM-187J	0.0007402
	Integrated age ± 2s			n=9		11.6746	0.0127157		K2O=0.05%	12.5349	3.4437			NM-187J
	Plateau ± 2s		steps C-H	n=6	MSWD=1.64	9.24553	0.018±0.021		79.1933	3.52931	0.251837			NM-187J
	Isochron±2s		steps C-H	n=6	MSWD=1.77		40Ar/36Ar=	286.1±7.8		3.92395	0.31201
	120304cl-djk, Groundmass Concentrate, 54.87 mg, J=0.0007457±0.12%, D=1.0055±0.001, NM-187J, Lab#=55546-01
x	A	625	56889.6	14.2148	189992	0.163788	0.0358926	1.31486	0.320172	806.176	226.642	322	Groundmass Concentrate, 54.87 mg; Automated furnace analysis	NM-187J	1.0055	0.001				55546-01A	120304cl-djk	189.992	22.7941	0.0020949	14.2148	1.70676	27.8609	3.34525	18.6113	0.0017753	36.0165	4.32154	56889.6	6825.92	755.533	263.386	1.31486	0.172018	806.176	226.642	226.644	226.658	0	0.00071		0.005006	284.789	NM-187J	0.0007457
x	B	700	1035.72	2.5265	3475.77	2.64954	0.201941	0.853781	5.49949	11.8781	5.80193	451	Groundmass Concentrate, 54.87 mg; Automated furnace analysis	NM-187J	1.0055	0.001				55546-01B	120304cl-djk	3.47577	0.0254607	0.0203529	2.5265	0.0205647	4.95193	0.0403068	0.74822	2.2e-05	0.679404	0.0054249	1035.72	7.63907	8.85847	4.34123	0.853781	0.137037	11.8781	5.80193	5.80195	5.69968	0	0.00065		0.0804158	83.2885	NM-187J	0.0007457
x	C	750	424.281	1.7714	1414.29	0.814575	0.288023	1.53315	7.09182	8.74067	2.68257	381	Groundmass Concentrate, 54.87 mg; Automated furnace analysis	NM-187J	1.0055	0.001				55546-01C	120304cl-djk	1.41429	0.0083895	0.03507	1.7714	0.0117805	3.47194	0.0230898	0.360114	1.28e-05	0.285199	0.0022069	424.281	2.30784	6.51296	2.00372	1.53315	0.26029	8.74067	2.68257	2.68259	2.73296	0	0.00075		0.0246591	10.4624	NM-187J	0.0007457
x	D	800	320.803	2.11979	1051.25	6.6867	0.240686	3.22153	20.163	13.8705	1.73895	463	Groundmass Concentrate, 54.87 mg; Automated furnace analysis ; Det. IC= 23.81304	NM-187J	1.0055	0.001				55546-01D	120304cl-djk	1.05125	0.0021437	0.0564608	2.11979	0.0351111	4.1548	0.0688177	0.0619777	3.68e-05	0.211337	0.0007618	320.803	0.656983	10.3501	1.30259	3.22153	0.116693	13.8705	1.73895	1.73903	1.68918	0	0.00071	0	0.20264	65.0075	NM-187J	0.0007457
	E	875	101.73	2.0517	316.454	10.8095	0.248674	8.2445	41.2934	11.2642	0.584093	457	Groundmass Concentrate, 54.87 mg; Automated furnace analysis ; Det. IC= 23.55998	NM-187J	1.0055	0.001				55546-01E	120304cl-djk	0.316454	0.0007027	0.181535	2.0517	0.025244	4.02133	0.0494782	0.0596888	2.66e-05	0.0734353	0.000331	101.73	0.20313	8.39916	0.436892	8.2445	0.210993	11.2642	0.584093	0.584248	0.605455	0	2.1249	0	1.84621e-14	1.87814e-12	NM-187J	0.0007457
	F	975	47.232	2.90057	136.106	10.7539	0.175898	15.3552	62.3152	9.75033	0.277739	444	Groundmass Concentrate, 54.87 mg; Automated furnace analysis ; Det. IC= 23.32922	NM-187J	1.0055	0.001				55546-01F	120304cl-djk	0.136106	0.0004631	0.59671	2.90057	0.024077	5.68513	0.0471909	0.0159213	2.57e-05	0.0387216	0.0002084	47.232	0.104649	7.26731	0.20757	15.3552	0.259862	9.75033	0.277739	0.277984	0.273591	0	2.1249	0	1.83782e-14	8.6804e-13	NM-187J	0.0007457
	G	1075	60.0647	2.42453	178.097	8.8866	0.210434	12.7157	79.6868	10.2631	0.340783	424	Groundmass Concentrate, 54.87 mg; Automated furnace analysis ; Det. IC= 23.30235	NM-187J	1.0055	0.001				55546-01G	120304cl-djk	0.178097	0.0005021	0.381178	2.42453	0.0265034	4.75208	0.0519467	0.069604	2.8e-05	0.047652	0.000218	60.0647	0.103192	7.65061	0.254759	12.7157	0.222073	10.2631	0.340783	0.341004	0.349444	0	2.1249	0	1.51819e-14	9.11896e-13	NM-187J	0.0007457
	H	1250	39.4965	12.0977	112.592	9.11982	0.0421736	18.2964	97.5142	9.77823	0.247723	427	Groundmass Concentrate, 54.87 mg; Automated furnace analysis ; Det. IC= 23.13938	NM-187J	1.0055	0.001				55546-01H	120304cl-djk	0.112592	0.0004167	3.00852	12.0977	0.0286027	23.7115	0.0560612	0.0077647	3.84e-05	0.0337701	0.0002569	39.4965	0.0624561	7.28817	0.18514	18.2964	0.310072	9.77823	0.247723	0.247999	0.246251	0	2.1249	0	1.56867e-14	6.1957e-13	NM-187J	0.0007457
xi	I	1700	75.2878	32.4602	234.572	1.27164	0.0157178	11.4994	100	11.8788	0.639207	427	Groundmass Concentrate, 54.87 mg; Automated furnace analysis ; Det. IC= 22.86946	NM-187J	1.0055	0.001				55546-01I	120304cl-djk	0.234572	0.0014228	3.87466	32.4602	0.236022	63.6219	0.462603	0.137011	0.0002539	0.0582935	0.0008808	75.2878	0.278777	8.85895	0.47828	11.4994	0.499322	11.8788	0.639207	0.639365	0.638273	0	2.1249	0	2.21923e-15	1.67081e-13	NM-187J	0.0007457
	Integrated age ± 2s			n=9		51.1561	0.103415		K2O=0.48%	14.0509	3.19444			NM-187J
	Plateau ± 2s		steps E-H	n=4	MSWD=2.29	39.5699	0.17 ±0.18		77.3512	9.97844	0.474456			NM-187J
	Isochron±2s		steps A-H	n=8	MSWD=1.68		40Ar/36Ar=	297.7±1.3		9.52621	0.424899
	110604c-djk, Groundmass Concentrate, 107.88 mg, J=0.0007506±0.16%, D=1.0055±0.001, NM-187J, Lab#=55547-01
xi	A	625	11968.1	1.20989	40566.8	0.307779	0.421696	-0.160923	1.11568	-26.2929	70.1173	300	Groundmass Concentrate, 107.88 mg; Automated furnace analysis	NM-187J	1.0055	0.001				55547-01A	110604c-djk	40.5668	1.44915	0.0008351	1.20989	0.0458705	2.37138	0.0899063	5.06256	4.78e-05	7.7214	0.276618	11968.1	427.579	-19.2758	51.0308	-0.160923	0.151091	-26.2929	70.1173	70.1173	70.0271	0	0.00079		0.0093063	111.379	NM-187J	0.0007506
	B	700	46.8703	2.31398	150.891	6.7093	0.220487	5.2775	25.4364	3.35189	0.281706	453	Groundmass Concentrate, 107.88 mg; Automated furnace analysis ; Det. IC= 22.57248	NM-187J	1.0055	0.001				55547-01B	110604c-djk	0.150891	0.000427	0.429394	2.31398	0.0447165	4.53541	0.0876444	0.0194912	4.67e-05	0.0415884	0.0002922	46.8703	0.0903194	2.47759	0.20842	5.2775	0.225288	3.35189	0.281706	0.281756	0.268852	0	0.00072	0	0.203311	9.52922	NM-187J	0.0007506
	C	750	36.9101	3.18526	116.488	0.708215	0.160177	7.45429	28.0036	3.73023	0.49787	384	Groundmass Concentrate, 107.88 mg; Automated furnace analysis	NM-187J	1.0055	0.001				55547-01C	110604c-djk	0.116488	0.0012605	0.765633	3.18526	0.0187391	6.2431	0.0367287	0.0933829	2.05e-05	0.0365186	0.0007523	36.9101	0.193728	2.75753	0.368426	7.45429	0.921533	3.73023	0.49787	0.497904	0.493328	0	0.00065		0.0215046	0.793736	NM-187J	0.0007506
	D	800	38.7644	7.30614	123.982	4.56496	0.0698322	7.04808	44.5513	3.7149	0.291363	463	Groundmass Concentrate, 107.88 mg; Automated furnace analysis ; Det. IC= 22.88902	NM-187J	1.0055	0.001				55547-01D	110604c-djk	0.123982	0.0005723	1.65001	7.30614	0.0670694	14.32	0.131456	0.103463	7.13e-05	0.0379469	0.0002947	38.7644	0.087518	2.74619	0.215608	7.04808	0.403654	3.7149	0.291363	0.291421	0.300717	0	0.00063	0	0.139073	5.3911	NM-187J	0.0007506
	E	875	46.9283	12.928	155.947	3.54438	0.0394649	4.08206	57.3994	2.61584	0.355257	457	Groundmass Concentrate, 107.88 mg; Automated furnace analysis ; Det. IC= 22.89585	NM-187J	1.0055	0.001				55547-01E	110604c-djk	0.155947	0.0007746	2.32121	12.928	0.0684713	25.339	0.134204	-0.0700055	7.58e-05	0.0403741	0.0004331	46.9283	0.155217	1.93314	0.262729	4.08206	0.39651	2.61584	0.355257	0.35528	0.353762	0	2.12488	0	6.10116e-15	2.86317e-13	NM-187J	0.0007506
	F	975	59.3097	17.8271	197.844	3.96033	0.0286195	3.91502	71.7553	3.18123	0.408291	441	Groundmass Concentrate, 107.88 mg; Automated furnace analysis ; Det. IC= 22.88938	NM-187J	1.0055	0.001				55547-01F	110604c-djk	0.197844	0.0007882	2.52301	17.8271	0.062476	34.9412	0.122453	-7.94e-05	7.41e-05	0.0493755	0.0004058	59.3097	0.162957	2.35133	0.302045	3.91502	0.319184	3.18123	0.408291	0.408321	0.416412	0	2.12489	0	6.84024e-15	4.05693e-13	NM-187J	0.0007506
	G	1075	132.184	14.3778	443.023	3.791	0.0354856	1.86159	85.4975	3.36292	0.809934	423	Groundmass Concentrate, 107.88 mg; Automated furnace analysis ; Det. IC= 23.00158	NM-187J	1.0055	0.001				55547-01G	110604c-djk	0.443023	0.0012539	0.908707	14.3778	0.0781157	28.1805	0.153107	0.155391	8.62e-05	0.0985092	0.0005803	132.184	0.281268	2.48575	0.599232	1.86159	0.216423	3.36292	0.809934	0.809951	0.81335	0	2.12489	0	6.53184e-15	8.63408e-13	NM-187J	0.0007506
	H	1250	152.327	53.7575	520.761	3.22507	0.00949085	1.89706	97.1881	4.06153	1.01886	428	Groundmass Concentrate, 107.88 mg; Automated furnace analysis ; Det. IC= 23.11292	NM-187J	1.0055	0.001				55547-01H	110604c-djk	0.520761	0.0016743	2.8904	53.7575	0.13427	105.365	0.263168	0.168069	0.0001763	0.111699	0.0007475	152.327	0.357247	3.00272	0.7541	1.89706	0.266441	4.06153	1.01886	1.01888	1.01819	0	2.12488	0	5.71634e-15	8.70751e-13	NM-187J	0.0007506
xi	I	1700	354.866	60.2099	1205.06	0.775715	0.00847375	1.05803	100	5.30016	2.40967	427	Groundmass Concentrate, 107.88 mg; Automated furnace analysis ; Det. IC= 22.93042	NM-187J	1.0055	0.001				55547-01I	110604c-djk	1.20505	0.0083792	1.39901	60.2099	0.469604	118.011	0.920423	0.38958	0.0005031	0.244076	0.0023949	354.866	2.33679	3.9198	1.78472	1.05803	0.274258	5.30016	2.40967	2.40968	2.29229	0	2.12488	0	1.38142e-15	4.90221e-13	NM-187J	0.0007506
	Integrated age ± 2s			n=9		27.5867	0.0313992		K2O=0.13%	3.11372	2.62844			NM-187J
	Plateau ± 2s		steps B-H	n=7	MSWD=1.18	26.5032	0.09 ±0.16		96.0724	3.34402	0.32466			NM-187J
	Isochron±2s		steps B-H	n=7	MSWD=1.42		40Ar/36Ar=	295.6±2.8		3.31411	0.657249
	120304a-djk, Groundmass Concentrate, 92.29 mg, J=0.0007486±0.17%, D=1.0055±0.001, NM-187K, Lab#=55548-01
xi	A	625	3768.09	2.53854	12561.4	1.35371	0.200983	1.49702	1.89059	74.7478	19.8811	330	Groundmass Concentrate, 92.29 mg; Automated furnace analysis	NM-187K	1.0055	0.001				55548-01A	120304a-djk	12.5614	0.107785	0.0056585	2.53854	0.0239607	4.97554	0.0469629	1.38026	2.54e-05	2.3962	0.0210702	3768.09	32.6052	56.5095	15.3437	1.49702	0.101681	74.7478	19.8811	19.8815	18.8516	0	0.00087		0.0409019	154.122	NM-187K	0.0007486
	B	700	59.2951	2.63646	176.442	5.38223	0.193518	12.4369	9.40741	9.95036	0.395535	450	Groundmass Concentrate, 92.29 mg; Automated furnace analysis ; Det. IC= 22.80253	NM-187K	1.0055	0.001				55548-01B	120304a-djk	0.176443	0.0007129	0.418385	2.63646	0.0276564	5.16747	0.0542065	0.0597038	2.92e-05	0.0471423	0.0003993	59.2951	0.106548	7.38809	0.294493	12.4369	0.339389	9.95036	0.395535	0.395881	0.409189	0	0.0009	0	0.162533	9.63739	NM-187K	0.0007486
	C	750	18.4938	1.82506	37.2499	2.16178	0.279555	41.2974	12.4265	10.2984	0.165725	392	Groundmass Concentrate, 92.29 mg; Automated furnace analysis	NM-187K	1.0055	0.001				55548-01C	120304a-djk	0.0372499	0.0003535	1.37186	1.82506	0.0085309	3.57712	0.0167206	-0.0127746	9.59572e-06	0.0196671	0.000256	18.4938	0.0796276	7.64725	0.123413	41.2974	0.601056	10.2984	0.165725	0.166607	0.163586	0	0.00091		0.065231	1.20637	NM-187K	0.0007486
	D	800	19.5642	1.60887	41.778	11.7062	0.317119	37.5784	28.7755	9.9129	0.107779	456	Groundmass Concentrate, 92.29 mg; Automated furnace analysis ; Det. IC= 22.39233	NM-187K	1.0055	0.001				55548-01D	120304a-djk	0.041778	0.0001931	1.07828	1.60887	0.0160356	3.15339	0.0314297	0.0172895	1.7e-05	0.0211039	0.0001715	19.5642	0.0509635	7.3602	0.0802449	37.5784	0.284766	9.9129	0.107779	0.109032	0.107759	0	0.00093	0	0.353035	6.90684	NM-187K	0.0007486
	E	875	29.457	2.23952	74.9663	12.0167	0.227819	25.4261	45.558	10.1027	0.158605	451	Groundmass Concentrate, 92.29 mg; Automated furnace analysis ; Det. IC= 22.5446	NM-187K	1.0055	0.001				55548-01E	120304a-djk	0.0749663	0.0002438	0.836462	2.23952	0.0170165	4.38945	0.0333524	0.0082732	1.83e-05	0.027131	0.0001614	29.457	0.0539473	7.50153	0.118099	25.4261	0.235342	10.1027	0.158605	0.159492	0.157605	0	2.12502	0	2.05064e-14	6.04057e-13	NM-187K	0.0007486
	F	975	32.324	3.26999	83.5311	13.2511	0.156026	24.4745	64.0645	10.6771	0.168515	444	Groundmass Concentrate, 92.29 mg; Automated furnace analysis ; Det. IC= 22.61242	NM-187K	1.0055	0.001				55548-01F	120304a-djk	0.0835311	0.0002327	1.09612	3.26999	0.0125065	6.40918	0.0245127	0.0224174	1.46e-05	0.028967	0.0002122	32.324	0.0473005	7.9293	0.125518	24.4745	0.209246	10.6771	0.168515	0.169447	0.165282	0	2.12502	0	2.26292e-14	7.31468e-13	NM-187K	0.0007486
xi	G	1075	25.9024	2.46015	62.2606	10.5401	0.207388	29.7576	78.7848	10.3978	0.132112	423	Groundmass Concentrate, 92.29 mg; Automated furnace analysis ; Det. IC= 22.48265	NM-187K	1.0055	0.001				55548-01G	120304a-djk	0.0622606	0.0001979	1.10638	2.46015	0.0165378	4.82189	0.0324142	0.0248778	1.79e-05	0.0250573	0.0001749	25.9024	0.0406218	7.72123	0.0983875	29.7576	0.216505	10.3978	0.132112	0.133237	0.133777	0	2.12501	0	1.79909e-14	4.66008e-13	NM-187K	0.0007486
xi	H	1250	30.8737	13.0154	80.1278	12.2379	0.0392	26.7957	95.8763	11.2403	0.165977	427	Groundmass Concentrate, 92.29 mg; Automated furnace analysis ; Det. IC= 22.60723	NM-187K	1.0055	0.001				55548-01H	120304a-djk	0.0801278	0.0002265	4.54813	13.0154	0.0264344	25.5102	0.0518115	0.0173995	3.79e-05	0.0278262	0.000222	30.8737	0.0546562	8.34888	0.123665	26.7957	0.230308	11.2403	0.165977	0.167024	0.171047	0	2.12502	0	2.10429e-14	6.49672e-13	NM-187K	0.0007486
xi	I	1700	54.7967	23.6201	162.571	2.95267	0.0216004	15.8974	100	11.9231	0.376764	428	Groundmass Concentrate, 92.29 mg; Automated furnace analysis ; Det. IC= 22.45589	NM-187K	1.0055	0.001				55548-01I	120304a-djk	0.162571	0.000741	4.06815	23.6201	0.0985814	46.2954	0.193219	0.0811071	0.0001129	0.0440778	0.0004308	54.7967	0.170059	8.8577	0.280824	15.8974	0.356399	11.9231	0.376764	0.377284	0.368016	0	2.12501	0	5.1158e-15	2.80329e-13	NM-187K	0.0007486
	Integrated age ± 2s			n=9		71.6024	0.0994979		K2O=0.40%	11.7288	1.09876			NM-187K
	Plateau ± 2s		steps B-F	n=5	MSWD=3.94	44.518	0.23 ±0.13		62.1739	10.152	0.280162			NM-187K
	Isochron±2s		steps B-F	n=5	MSWD=4.56		40Ar/36Ar=	297.9±3.8		9.96962	0.332732
	SCV-1584-040603-djk, Groundmass Concentrate, 93.33 mg, J=0.0007432±0.10%, D=1.0055±0.001, NM-187K, Lab#=55549-01
x	A	625	6976.81	3.11702	23559.4	0.124259	0.163683	0.218735	0.52088	20.3905	39.0581	297	Groundmass Concentrate, 93.33 mg; Automated furnace analysis	NM-187K	1.0055	0.001				55549-01A	SCV-1584-040603-djk	23.5594	0.717442	0.0037045	3.11702	0.102505	6.10935	0.20091	0.110354	0.0001068	4.43519	0.136819	6976.81	212.383	15.2941	29.4618	0.218735	0.140576	20.3905	39.0581	39.0581	39.6855	0	0.00064		0.0037738	26.3294	NM-187K	0.0007432
	B	700	55.1866	2.17663	174.439	4.07547	0.234401	6.92185	17.6048	5.12227	0.357216	454	Groundmass Concentrate, 93.33 mg; Automated furnace analysis	NM-187K	1.0055	0.001				55549-01B	SCV-1584-040603-djk	0.174439	0.0006045	0.34938	2.17663	0.0058722	4.26619	0.0115095	0.0072125	7.50352e-06	0.0457762	0.0003633	55.1866	0.104494	3.82577	0.267179	6.92185	0.301861	5.12227	0.357216	0.357253	0.347375	0	0.00064		0.123689	6.82599	NM-187K	0.0007432
	C	750	53.1153	3.36696	165.633	1.13262	0.151532	8.37679	22.3527	5.96986	0.493346	394	Groundmass Concentrate, 93.33 mg; Automated furnace analysis	NM-187K	1.0055	0.001				55549-01C	SCV-1584-040603-djk	0.165633	0.0011445	0.569181	3.36696	0.0146797	6.59925	0.0287721	-0.125146	1.67e-05	0.041529	0.0006616	53.1153	0.20108	4.45987	0.369171	8.37679	0.583843	5.96986	0.493346	0.493383	0.519419	0	0.00067		0.0343826	1.82624	NM-187K	0.0007432
	D	800	44.1091	6.5826	139.278	3.96814	0.077508	7.92852	38.9867	4.70458	0.300072	461	Groundmass Concentrate, 93.33 mg; Automated furnace analysis ; Det. IC= 21.6886	NM-187K	1.0055	0.001				55549-01D	SCV-1584-040603-djk	0.139277	0.000573	1.32335	6.5826	0.0459715	12.9019	0.0901041	-0.008061	4.96e-05	0.038702	0.0003803	44.1091	0.110757	3.51339	0.224386	7.92852	0.339537	4.70458	0.300072	0.300109	0.308044	0	0.00071	0	0.120632	5.32096	NM-187K	0.0007432
	E	875	42.3764	10.6273	133.843	2.94872	0.0480089	8.74351	51.3475	4.99818	0.294904	454	Groundmass Concentrate, 93.33 mg; Automated furnace analysis ; Det. IC= 21.73694	NM-187K	1.0055	0.001				55549-01E	SCV-1584-040603-djk	0.133843	0.0005794	2.22324	10.6273	0.0755767	20.8295	0.14813	0.0192858	8.14e-05	0.0380399	0.0003634	42.3764	0.122144	3.73295	0.220558	8.74351	0.356148	4.99818	0.294904	0.294948	0.303822	0	2.12479	0	5.07134e-15	2.14905e-13	NM-187K	0.0007432
	F	975	37.997	12.8258	120.974	3.28013	0.0397794	8.71192	65.0974	4.47304	0.29255	439	Groundmass Concentrate, 93.33 mg; Automated furnace analysis ; Det. IC= 21.7518	NM-187K	1.0055	0.001				55549-01F	SCV-1584-040603-djk	0.120974	0.0006077	2.96859	12.8258	0.0777721	25.1386	0.152433	-0.0328516	8.49e-05	0.0345314	0.0004215	37.997	0.124119	3.34026	0.218734	8.71192	0.42985	4.47304	0.29255	0.292585	0.30034	0	2.12479	0	5.65002e-15	2.14684e-13	NM-187K	0.0007432
	G	1075	39.5938	9.58888	125.012	4.31891	0.0532079	8.70381	83.2019	4.64582	0.300802	424	Groundmass Concentrate, 93.33 mg; Automated furnace analysis ; Det. IC= 21.80074	NM-187K	1.0055	0.001				55549-01G	SCV-1584-040603-djk	0.125012	0.0006261	2.14771	9.58888	0.0574327	18.7942	0.112568	-0.0303066	6.27e-05	0.0354725	0.0002991	39.5938	0.106486	3.46945	0.224926	8.70381	0.422272	4.64582	0.300802	0.300839	0.285502	0	2.12476	0	7.4242e-15	2.93952e-13	NM-187K	0.0007432
	H	1250	57.6763	49.8651	197.855	2.95189	0.0102317	5.78397	95.5759	4.62868	0.456913	430	Groundmass Concentrate, 93.33 mg; Automated furnace analysis ; Det. IC= 21.91281	NM-187K	1.0055	0.001				55549-01H	SCV-1584-040603-djk	0.197855	0.0009277	7.0568	49.8651	0.193615	97.7356	0.379486	0.0201349	0.0002248	0.0484325	0.0005394	57.6763	0.218687	3.45663	0.341654	5.78397	0.419857	4.62868	0.456913	0.456937	0.44624	0	2.1248	0	5.22083e-15	3.01118e-13	NM-187K	0.0007432
x	I	1700	62.9988	89.5645	221.449	1.0554	0.0056965	7.89114	100	7.09738	0.703476	426	Groundmass Concentrate, 93.33 mg; Automated furnace analysis ; Det. IC= 21.69232	NM-187K	1.0055	0.001				55549-01I	SCV-1584-040603-djk	0.221449	0.0013712	11.3246	89.5645	0.389414	175.547	0.763252	0.0674353	0.0004429	0.052116	0.0006138	62.9988	0.242113	5.30386	0.526741	7.89114	0.681041	7.09738	0.703476	0.703513	0.713302	0	2.12479	0	1.92213e-15	1.21092e-13	NM-187K	0.0007432
	Integrated age ± 2s			n=9		23.8556	0.0301576		K2O=0.13%	5.00813	1.11322			NM-187K
	Plateau ± 2s		steps B-H	n=7	MSWD=1.43	22.6759	0.09 ±0.16		95.055	4.83554	0.303422			NM-187K
	Isochron±2s		steps A-I	n=9	MSWD=2.91		40Ar/36Ar=	297.2±2.4		4.59248	0.503896
	Notes:
	Isotopic ratios corrected for blank, radioactive decay, and mass discrimination, not corrected for interfering reactions.
	Errors quoted for individual analyses include analytical error only, without interfering reaction or J uncertainties.
	Integrated age calculated by summing isotopic measurements of all steps.																			--- Atmospheric argon ratios and discrimination ---
	Integrated age error is volume-weighted mean of step errors.																			(40Ar/36Ar)atm	295.5 ± 0.5
	Plateau age is inverse-variance-weighted mean of selected steps.																			(40Ar/38Ar)atm	1575 ± 2
	Plateau age error is inverse-variance-weighted mean error (Taylor, 1982) times root MSWD where MSWD>1.																			Source of spectrometer discrimination value and error	Data file
	Plateau error is weighted error of Taylor (1982).
	Decay constants and isotopic abundances after Steiger and Jäger (1977).																			Source of spectrometer sensitivity value and error	Saved with run
	# symbol preceding sample ID denotes analyses excluded from plateau age calculations.
	Weight percent K2O calculated from 39Ar signal, sample weight, and instrument sensitivity.																			--- Source of J and use of J Adjustment Table ---
	Ages calculated relative to FC-2 Fish Canyon Tuff sanidine interlaboratory standard at 28.02 Ma																			Use J saved with run	FALSE
	Decay Constant (LambdaK (total)) = 5.543e-10/a																			J adjustment table useage	Use as J
	Correction factors:																			--- Minor irradiation parameters (see also Irradiation Data File) ---
	(39Ar/37Ar)Ca = 0.0007 ± 5e-05																			(38Ar/37Ar)Ca	0.00014 ± 0
	(36Ar/37Ar)Ca = 0.00028 ± 1e-05																			(38Ar/39Ar)K	0.01077 ± 0
	(38Ar/39Ar)K = 0.013																			P(36Cl/38Cl)	320 ± 0
	(40Ar/39Ar)K = 0 ± 0.0004
																				--- Decay constants ---
																				Lambda 40K epsilon	5.810000e-11 ± 5.810000e-11
																				Lambda 40K Beta	4.962000e-10 ± 4.962000e-10
																				Lambda 37Ar	0.01975 ± 0
																				Lambda 39Ar	7.068000e-6 ± 0
																				Lambda 36Cl	6.308000e-9 ± 0
																				--- Calculation options ---
																				Normalize gain	FALSE
																				Always calculate without ratios	FALSE
																				Calc. %40Ar* as %40*/(40*+40Atm)	TRUE
																				Number of trials in Monte Carlo sim.	1000
																				37Ar/39Ar calculation	Normal
																				H35Cl Correction	FALSE
																				--- Isotope curve fitting ---
																				Parabolic vs. Linear probability cutoff	0.05
																				Error envelope as 1 or 2 sigma	2
																				Delete outliers within cycles before fit	TRUE
																				Average cycles before fit	FALSE
																				Delete outliers after fit	TRUE
																				Number of iterations of deleting outliers after fit	1
																				Cutoff for detecting outliers, sigma	2
																				Method of centroid location is	mean
																				--- Files ---
																				Irradiation data file	Macintosh HD:Users:mcintosh:KAr:Aux.Data:Irradiation Data pre and#142B57
																				J Adjustment table	Macintosh HD:Users:mcintosh:Desktop: Kelley 2008:J-Adjustment:J-Adjustment Jemez 28.02
[truncated: 108 more columns]

## Sheet: Koning step 1
Run_ID	Sample	Ar36_Over_Ar39	Ar36_Over_Ar39_Er	PctAr36Ca	Ar37_Over_Ar39	Ar37_Over_Ar39_Er	Ca_Over_K	Ca_Over_K_Er	Cl_Over_K	Cl_Over_K_Er	Ar38_Over_Ar39	Ar38_Over_Ar39_Er	Ar40_Over_Ar39	Ar40_Over_Ar39_Er	Ar40Rad_Over_Ar39	Ar40Rad_Over_Ar39_Er	PctAr40Rad	PctAr40Rad_Er	Age	Age_Er	Age_Er_with_J_er	Age_Monte_Carlo	Age_Er_with_external_error	EMV_Axial	EMV_Off_axis	Ar39_Moles	Ar40_Moles	Irrad	J	J_Er	37_Decay	39_Decay	Ca_39_Over_37	Ca_39_Over_37_Er	Ca_38_Over_37	Ca_38_Over_37_Er	Ca_36_Over_37	Ca_36_Over_37_Er	K_38_Over_39	K_38_Over_39_Er	K_40_Over_39	K_40_Over_39_Er	K_37_Over_39	K_37_Over_39_Er	P36Cl_Over_38Cl	P36Cl_Over_38Cl_Er	Ca_Over_K_Multiplier	Ca_Over_K_Multiplier_Er	System_
55542-01A	ML-767-190404-djk	57.456	1.81975	0.001705	3.49865	0.116072	6.85735	0.227501	5.5427	0.0001209	10.8993	0.345728	17194.3	544.999	216.893	72.1558	1.25833	0.135544	271.807	83.9425	83.943	87.9422	0	0.00075		0.0096198	165.406	NM-187J	0.0007497	8.5078e-07	2.02048	1.00025	0.0007	5e-05	2e-05	5e-06	0.00028	1e-05	0.013	0.001	0	0.0004	0	0	96	0	1.96	0	3
55542-01B	ML-767-190404-djk	0.559451	0.0024036	0.205226	4.10049	0.0622108	8.03696	0.121933	0.130572	6.52e-05	0.120304	0.0009874	173.473	0.616039	8.51908	0.828228	4.8968	0.281836	11.4856	1.11308	1.11316	1.14965	0	0.00079	0	0.0819055	14.2084	NM-187J	0.0007497	8.5078e-07	2.02116	1.00025	0.0007	5e-05	2e-05	5e-06	0.00028	1e-05	0.013	0.001	0	0.0004	0	0	96	0	1.96	0	3
55542-01C	ML-767-190404-djk	0.191539	0.0013771	0.657431	4.49728	0.0197834	8.81466	0.0387755	0.0243466	2.25e-05	0.0492173	0.000778	63.8195	0.2644	7.61578	0.431186	11.8957	0.565948	10.2712	0.579876	0.579992	0.562208	0	0.00078		0.0287973	1.83783	NM-187J	0.0007497	8.5078e-07	2.02256	1.00025	0.0007	5e-05	2e-05	5e-06	0.00028	1e-05	0.013	0.001	0	0.0004	0	0	96	0	1.96	0	3
55542-01D	ML-767-190404-djk	0.373401	0.0010659	0.404026	5.38799	0.0285935	10.5604	0.0560433	0.0236409	3.16e-05	0.0832875	0.0004621	118.701	0.265512	8.84019	0.504554	7.41935	0.194256	11.917	0.677925	0.678059	0.701155	0	0.0008	0	0.202304	24.0137	NM-187J	0.0007497	8.5078e-07	2.02311	1.00025	0.0007	5e-05	2e-05	5e-06	0.00028	1e-05	0.013	0.001	0	0.0004	0	0	96	0	1.96	0	3
55542-01E	ML-767-190404-djk	0.263782	0.0005943	0.546243	5.14605	0.0229911	10.0862	0.0450626	0.0591405	2.6e-05	0.0634137	0.0003866	85.67	0.150935	8.17756	0.348011	9.51104	0.163896	11.0265	0.467822	0.467989	0.471047	0	2.12489	0	1.68046e-14	1.43965e-12	NM-187J	0.0007497	8.5078e-07	2.02366	1.00025	0.0007	5e-05	2e-05	5e-06	0.00028	1e-05	0.013	0.001	0	0.0004	0	0	96	0	1.96	0	3
55542-01F	ML-767-190404-djk	0.118721	0.000359	0.677401	2.8722	0.0109781	5.62951	0.0215171	0.0059905	1.28e-05	0.0352699	0.0002961	42.2048	0.0680042	7.37531	0.179158	17.4399	0.243594	9.94775	0.240982	0.241245	0.234657	0	2.1249	0	1.69679e-14	7.16129e-13	NM-187J	0.0007497	8.5078e-07	2.02422	1.00025	0.0007	5e-05	2e-05	5e-06	0.00028	1e-05	0.013	0.001	0	0.0004	0	0	96	0	1.96	0	3
55542-01G	ML-767-190404-djk	0.098192	0.0004037	0.88029	3.08705	0.0263034	6.05062	0.0515546	0.0439874	2.8e-05	0.0321401	0.0002297	36.0553	0.0751806	7.31078	0.166513	20.2328	0.311658	9.86095	0.223984	0.224262	0.22246	0	2.12491	0	9.70987e-15	3.50092e-13	NM-187J	0.0007497	8.5078e-07	2.02477	1.00025	0.0007	5e-05	2e-05	5e-06	0.00028	1e-05	0.013	0.001	0	0.0004	0	0	96	0	1.96	0	3
55542-01H	ML-767-190404-djk	0.164254	0.0005195	3.3689	19.7628	0.0417745	38.735	0.081878	0.0249424	5.88e-05	0.0434742	0.0003658	54.2284	0.0951505	7.4291	0.252958	13.5101	0.285482	10.0201	0.340235	0.340424	0.335913	0	2.12491	0	1.09259e-14	5.92495e-13	NM-187J	0.0007497	8.5078e-07	2.02532	1.00025	0.0007	5e-05	2e-05	5e-06	0.00028	1e-05	0.013	0.001	0	0.0004	0	0	96	0	1.96	0	3
55542-01I	ML-767-190404-djk	0.272621	0.0010903	3.69245	35.9514	0.169083	70.4647	0.331404	0.0733833	0.00019	0.0640633	0.0007949	86.449	0.284129	9.09295	0.420399	10.2536	0.294107	12.2566	0.564747	0.564917	0.545311	0	2.12494	0	3.04923e-15	2.63603e-13	NM-187J	0.0007497	8.5078e-07	2.02587	1.00025	0.0007	5e-05	2e-05	5e-06	0.00028	1e-05	0.013	0.001	0	0.0004	0	0	96	0	1.96	0	3
55544-01A	110604b-djk	190.754	20.5787	0.0003859	2.62884	0.297451	5.15252	0.583005	3.13129	0.0003094	35.8622	3.8694	56537.8	6099.68	170.549	237.121	0.3011	0.12904	214.232	280.849	280.849	281.963	0	0.0008		0.0029081	164.415	NM-187J	0.0007393	1.2784e-06	2.034	1.00025	0.0007	5e-05	2e-05	5e-06	0.00028	1e-05	0.013	0.001	0	0.0004	0	0	96	0	1.96	0	3
55544-01B	110604b-djk	0.406973	0.0011976	0.239011	3.47396	0.075695	6.80896	0.148362	0.0795126	7.9e-05	0.0907403	0.0005517	122.64	0.245923	2.67347	0.562028	2.17464	0.235948	3.56224	0.748128	0.748153	0.736335	0	0.0008	0	0.103205	12.657	NM-187J	0.0007393	1.2784e-06	2.03469	1.00025	0.0007	5e-05	2e-05	5e-06	0.00028	1e-05	0.013	0.001	0	0.0004	0	0	96	0	1.96	0	3
55544-01C	110604b-djk	0.19424	0.0016491	0.700556	4.85985	0.0237846	9.52532	0.0466178	-0.0767669	2.66e-05	0.0477645	0.0011178	58.8202	0.286262	1.83064	0.510246	3.10167	0.77188	2.43997	0.679623	0.679636	0.718681	0	0.00087		0.0223906	1.31702	NM-187J	0.0007393	1.2784e-06	2.03611	1.00025	0.0007	5e-05	2e-05	5e-06	0.00028	1e-05	0.013	0.001	0	0.0004	0	0	96	0	1.96	0	3
55544-01D	110604b-djk	0.136807	0.000755	1.86606	9.11749	0.0790982	17.8703	0.155032	0.0001661	8.43e-05	0.0382912	0.0003672	41.4487	0.121841	1.78807	0.264156	4.28639	0.501301	2.38327	0.351854	0.351878	0.368619	0	0.00084	0	0.0906139	3.75583	NM-187J	0.0007393	1.2784e-06	2.03667	1.00025	0.0007	5e-05	2e-05	5e-06	0.00028	1e-05	0.013	0.001	0	0.0004	0	0	96	0	1.96	0	3
55544-01E	110604b-djk	0.108322	0.0007075	3.47792	13.4548	0.0757534	26.3714	0.148477	-0.0451869	8.33e-05	0.0318941	0.0004551	33.4299	0.0968916	2.55814	0.237408	7.5802	0.592746	3.40871	0.316046	0.316101	0.309571	0	2.12506	0	4.6859e-15	1.56649e-13	NM-187J	0.0007393	1.2784e-06	2.03722	1.00025	0.0007	5e-05	2e-05	5e-06	0.00028	1e-05	0.013	0.001	0	0.0004	0	0	96	0	1.96	0	3
55544-01F	110604b-djk	0.131831	0.0006947	3.65564	17.2117	0.0897119	33.735	0.175835	0.0454503	9.95e-05	0.0378915	0.0004736	38.7522	0.113122	1.23497	0.248593	3.14845	0.497943	1.6464	0.33126	0.331272	0.32873	0	2.12507	0	5.47688e-15	2.12241e-13	NM-187J	0.0007393	1.2784e-06	2.03777	1.00025	0.0007	5e-05	2e-05	5e-06	0.00028	1e-05	0.013	0.001	0	0.0004	0	0	96	0	1.96	0	3
55544-01G	110604b-djk	0.400228	0.0015696	1.1162	15.9548	0.0758165	31.2714	0.1486	0.0450976	8.51e-05	0.0882933	0.0005883	118.631	0.323057	1.70274	0.600385	1.4193	0.3077	2.26961	0.79976	0.79977	0.848667	0	2.12508	0	4.24388e-15	5.03455e-13	NM-187J	0.0007393	1.2784e-06	2.03833	1.00025	0.0007	5e-05	2e-05	5e-06	0.00028	1e-05	0.013	0.001	0	0.0004	0	0	96	0	1.96	0	3
55544-01H	110604b-djk	0.931613	0.0028776	1.95274	64.9715	0.178614	127.344	0.350084	0.196202	0.0002268	0.188857	0.0010199	272.902	0.689361	3.1283	1.32413	1.09417	0.239465	4.16757	1.76199	1.76201	1.79745	0	2.12509	0	4.09649e-15	1.11794e-12	NM-187J	0.0007393	1.2784e-06	2.03888	1.00025	0.0007	5e-05	2e-05	5e-06	0.00028	1e-05	0.013	0.001	0	0.0004	0	0	96	0	1.96	0	3
55544-01I	110604b-djk	1.03666	0.0061265	1.35292	50.0899	0.36647	98.1762	0.718281	0.336662	0.0003941	0.211886	0.0022084	307.226	1.38733	5.22035	1.87018	1.63961	0.43544	6.94927	2.48478	2.48481	2.414	0	2.1251	0	1.0167e-15	3.12356e-13	NM-187J	0.0007393	1.2784e-06	2.03944	1.00025	0.0007	5e-05	2e-05	5e-06	0.00028	1e-05	0.013	0.001	0	0.0004	0	0	96	0	1.96	0	3
55545-01A	V-63-061103-djk	1287.38	721.955	0.0003128	14.3817	8.07117	28.1881	15.8195	199.373	0.0083941	245.383	137.611	384813	215802	4439.7	2992.38	1.14211	0.135736	2625.68	932.27	932.273	957.803	0	0.00093		0.0005257	202.303	NM-187J	0.0007402	1.107e-06	2.04084	1.00025	0.0007	5e-05	2e-05	5e-06	0.00028	1e-05	0.013	0.001	0	0.0004	0	0	96	0	1.96	0	3
55545-01B	V-63-061103-djk	0.129433	0.0011032	2.13217	9.85616	0.1515	19.3181	0.29694	0.175275	0.0001588	0.0402444	0.0007221	40.9268	0.168539	3.51921	0.335584	8.53946	0.722486	4.69336	0.446967	0.447022	0.446821	0	0.00095	0	0.0480678	1.96726	NM-187J	0.0007402	1.107e-06	2.04153	1.00025	0.0007	5e-05	2e-05	5e-06	0.00028	1e-05	0.013	0.001	0	0.0004	0	0	96	0	1.96	0	3
55545-01C	V-63-061103-djk	0.0618566	0.001725	6.61104	14.6049	0.167703	28.6256	0.328697	0.2197	0.0001768	0.0282224	0.0016572	18.8998	0.220981	1.84854	0.495925	9.68075	2.56838	2.46682	0.661343	0.661353	0.66839	0	0.0009		0.0081165	0.153401	NM-187J	0.0007402	1.107e-06	2.04293	1.00026	0.0007	5e-05	2e-05	5e-06	0.00028	1e-05	0.013	0.001	0	0.0004	0	0	96	0	1.96	0	3
55545-01D	V-63-061103-djk	0.0354308	0.0004593	17.1732	21.7307	0.0961174	42.5922	0.18839	-0.0014603	0.000109	0.0187147	0.0003548	11.1309	0.0374527	2.49706	0.155143	22.0924	1.32636	3.33144	0.206792	0.206852	0.192785	0	0.00094	0	0.0686011	0.763592	NM-187J	0.0007402	1.107e-06	2.04349	1.00026	0.0007	5e-05	2e-05	5e-06	0.00028	1e-05	0.013	0.001	0	0.0004	0	0	96	0	1.96	0	3
55545-01E	V-63-061103-djk	0.0279296	0.0003837	26.0377	25.9723	0.114138	50.9057	0.223711	0.0864964	0.0001296	0.0188222	0.0004629	8.65576	0.0265637	2.59876	0.141653	29.4776	1.56984	3.46699	0.188797	0.188868	0.197481	0	2.12508	0	3.8165e-15	3.30347e-14	NM-187J	0.0007402	1.107e-06	2.04405	1.00026	0.0007	5e-05	2e-05	5e-06	0.00028	1e-05	0.013	0.001	0	0.0004	0	0	96	0	1.96	0	3
55545-01F	V-63-061103-djk	0.0293481	0.0002733	29.6144	31.0402	0.135473	60.8388	0.265528	0.0692722	0.000154	0.0185461	0.000267	8.91404	0.031114	2.87236	0.125968	31.5227	1.33745	3.83161	0.167858	0.167955	0.171659	0	2.12506	0	4.2993e-15	3.83241e-14	NM-187J	0.0007402	1.107e-06	2.0446	1.00026	0.0007	5e-05	2e-05	5e-06	0.00028	1e-05	0.013	0.001	0	0.0004	0	0	96	0	1.96	0	3
55545-01G	V-63-061103-djk	0.0534217	0.0005648	19.2389	36.7062	0.202908	71.9441	0.397699	0.10291	0.0002235	0.0234737	0.0005265	15.2808	0.0592004	2.59859	0.205772	16.5686	1.25788	3.46677	0.274256	0.274305	0.27184	0	2.12506	0	2.52e-15	3.85077e-14	NM-187J	0.0007402	1.107e-06	2.04516	1.00026	0.0007	5e-05	2e-05	5e-06	0.00028	1e-05	0.013	0.001	0	0.0004	0	0	96	0	1.96	0	3
55545-01H	V-63-061103-djk	0.17537	0.0020315	23.9851	150.224	1.02542	294.439	2.00983	0.282503	0.0011081	0.0450811	0.0012573	40.97	0.262942	1.76318	0.778068	3.85103	1.64749	2.35298	1.03766	1.03767	1.00175	0	2.12506	0	1.18921e-15	4.87218e-14	NM-187J	0.0007402	1.107e-06	2.04571	1.00026	0.0007	5e-05	2e-05	5e-06	0.00028	1e-05	0.013	0.001	0	0.0004	0	0	96	0	1.96	0	3
55545-01I	V-63-061103-djk	0.177996	0.0017158	20.2296	128.599	0.558742	252.055	1.09513	0.152309	0.0006356	0.0439704	0.001309	46.2797	0.188805	4.74989	0.692888	9.33953	1.303	6.33178	0.922025	0.922073	0.93747	0	2.12504	0	1.54729e-15	7.16083e-14	NM-187J	0.0007402	1.107e-06	2.04626	1.00026	0.0007	5e-05	2e-05	5e-06	0.00028	1e-05	0.013	0.001	0	0.0004	0	0	96	0	1.96	0	3
55546-01A	120304cl-djk	189.992	22.7941	0.0020949	14.2148	1.70676	27.8609	3.34525	18.6113	0.0017753	36.0165	4.32154	56889.6	6825.92	755.533	263.386	1.31486	0.172018	806.176	226.642	226.644	226.658	0	0.00071		0.005006	284.789	NM-187J	0.0007457	8.952e-07	2.09083	1.00026	0.0007	5e-05	2e-05	5e-06	0.00028	1e-05	0.013	0.001	0	0.0004	0	0	96	0	1.96	0	3
55546-01B	120304cl-djk	3.47577	0.0254607	0.0203529	2.5265	0.0205647	4.95193	0.0403068	0.74822	2.2e-05	0.679404	0.0054249	1035.72	7.63907	8.85847	4.34123	0.853781	0.137037	11.8781	5.80193	5.80195	5.69968	0	0.00065		0.0804158	83.2885	NM-187J	0.0007457	8.952e-07	2.09153	1.00026	0.0007	5e-05	2e-05	5e-06	0.00028	1e-05	0.013	0.001	0	0.0004	0	0	96	0	1.96	0	3
55546-01C	120304cl-djk	1.41429	0.0083895	0.03507	1.7714	0.0117805	3.47194	0.0230898	0.360114	1.28e-05	0.285199	0.0022069	424.281	2.30784	6.51296	2.00372	1.53315	0.26029	8.74067	2.68257	2.68259	2.73296	0	0.00075		0.0246591	10.4624	NM-187J	0.0007457	8.952e-07	2.09392	1.00026	0.0007	5e-05	2e-05	5e-06	0.00028	1e-05	0.013	0.001	0	0.0004	0	0	96	0	1.96	0	3
55546-01D	120304cl-djk	1.05125	0.0021437	0.0564608	2.11979	0.0351111	4.1548	0.0688177	0.0619777	3.68e-05	0.211337	0.0007618	320.803	0.656983	10.3501	1.30259	3.22153	0.116693	13.8705	1.73895	1.73903	1.68918	0	0.00071	0	0.20264	65.0075	NM-187J	0.0007457	8.952e-07	2.09449	1.00026	0.0007	5e-05	2e-05	5e-06	0.00028	1e-05	0.013	0.001	0	0.0004	0	0	96	0	1.96	0	3
55546-01E	120304cl-djk	0.316454	0.0007027	0.181535	2.0517	0.025244	4.02133	0.0494782	0.0596888	2.66e-05	0.0734353	0.000331	101.73	0.20313	8.39916	0.436892	8.2445	0.210993	11.2642	0.584093	0.584248	0.605455	0	2.1249	0	1.84621e-14	1.87814e-12	NM-187J	0.0007457	8.952e-07	2.09506	1.00026	0.0007	5e-05	2e-05	5e-06	0.00028	1e-05	0.013	0.001	0	0.0004	0	0	96	0	1.96	0	3
55546-01F	120304cl-djk	0.136106	0.0004631	0.59671	2.90057	0.024077	5.68513	0.0471909	0.0159213	2.57e-05	0.0387216	0.0002084	47.232	0.104649	7.26731	0.20757	15.3552	0.259862	9.75033	0.277739	0.277984	0.273591	0	2.1249	0	1.83782e-14	8.6804e-13	NM-187J	0.0007457	8.952e-07	2.09563	1.00026	0.0007	5e-05	2e-05	5e-06	0.00028	1e-05	0.013	0.001	0	0.0004	0	0	96	0	1.96	0	3
55546-01G	120304cl-djk	0.178097	0.0005021	0.381178	2.42453	0.0265034	4.75208	0.0519467	0.069604	2.8e-05	0.047652	0.000218	60.0647	0.103192	7.65061	0.254759	12.7157	0.222073	10.2631	0.340783	0.341004	0.349444	0	2.1249	0	1.51819e-14	9.11896e-13	NM-187J	0.0007457	8.952e-07	2.0962	1.00026	0.0007	5e-05	2e-05	5e-06	0.00028	1e-05	0.013	0.001	0	0.0004	0	0	96	0	1.96	0	3
55546-01H	120304cl-djk	0.112592	0.0004167	3.00852	12.0977	0.0286027	23.7115	0.0560612	0.0077647	3.84e-05	0.0337701	0.0002569	39.4965	0.0624561	7.28817	0.18514	18.2964	0.310072	9.77823	0.247723	0.247999	0.246251	0	2.1249	0	1.56867e-14	6.1957e-13	NM-187J	0.0007457	8.952e-07	2.09677	1.00026	0.0007	5e-05	2e-05	5e-06	0.00028	1e-05	0.013	0.001	0	0.0004	0	0	96	0	1.96	0	3
55546-01I	120304cl-djk	0.234572	0.0014228	3.87466	32.4602	0.236022	63.6219	0.462603	0.137011	0.0002539	0.0582935	0.0008808	75.2878	0.278777	8.85895	0.47828	11.4994	0.499322	11.8788	0.639207	0.639365	0.638273	0	2.1249	0	2.21923e-15	1.67081e-13	NM-187J	0.0007457	8.952e-07	2.09734	1.00026	0.0007	5e-05	2e-05	5e-06	0.00028	1e-05	0.013	0.001	0	0.0004	0	0	96	0	1.96	0	3
55547-01A	110604c-djk	40.5668	1.44915	0.0008351	1.20989	0.0458705	2.37138	0.0899063	5.06256	4.78e-05	7.7214	0.276618	11968.1	427.579	-19.2758	51.0308	-0.160923	0.151091	-26.2929	70.1173	70.1173	70.0271	0	0.00079		0.0093063	111.379	NM-187J	0.0007506	1.1801e-06	2.25488	1.00029	0.0007	5e-05	2e-05	5e-06	0.00028	1e-05	0.013	0.001	0	0.0004	0	0	96	0	1.96	0	3
55547-01B	110604c-djk	0.150891	0.000427	0.429394	2.31398	0.0447165	4.53541	0.0876444	0.0194912	4.67e-05	0.0415884	0.0002922	46.8703	0.0903194	2.47759	0.20842	5.2775	0.225288	3.35189	0.281706	0.281756	0.268852	0	0.00072	0	0.203311	9.52922	NM-187J	0.0007506	1.1801e-06	2.25564	1.00029	0.0007	5e-05	2e-05	5e-06	0.00028	1e-05	0.013	0.001	0	0.0004	0	0	96	0	1.96	0	3
55547-01C	110604c-djk	0.116488	0.0012605	0.765633	3.18526	0.0187391	6.2431	0.0367287	0.0933829	2.05e-05	0.0365186	0.0007523	36.9101	0.193728	2.75753	0.368426	7.45429	0.921533	3.73023	0.49787	0.497904	0.493328	0	0.00065		0.0215046	0.793736	NM-187J	0.0007506	1.1801e-06	2.2625	1.00029	0.0007	5e-05	2e-05	5e-06	0.00028	1e-05	0.013	0.001	0	0.0004	0	0	96	0	1.96	0	3
55547-01D	110604c-djk	0.123982	0.0005723	1.65001	7.30614	0.0670694	14.32	0.131456	0.103463	7.13e-05	0.0379469	0.0002947	38.7644	0.087518	2.74619	0.215608	7.04808	0.403654	3.7149	0.291363	0.291421	0.300717	0	0.00063	0	0.139073	5.3911	NM-187J	0.0007506	1.1801e-06	2.26312	1.00029	0.0007	5e-05	2e-05	5e-06	0.00028	1e-05	0.013	0.001	0	0.0004	0	0	96	0	1.96	0	3
55547-01E	110604c-djk	0.155947	0.0007746	2.32121	12.928	0.0684713	25.339	0.134204	-0.0700055	7.58e-05	0.0403741	0.0004331	46.9283	0.155217	1.93314	0.262729	4.08206	0.39651	2.61584	0.355257	0.35528	0.353762	0	2.12488	0	6.10116e-15	2.86317e-13	NM-187J	0.0007506	1.1801e-06	2.26374	1.00029	0.0007	5e-05	2e-05	5e-06	0.00028	1e-05	0.013	0.001	0	0.0004	0	0	96	0	1.96	0	3
55547-01F	110604c-djk	0.197844	0.0007882	2.52301	17.8271	0.062476	34.9412	0.122453	-7.94e-05	7.41e-05	0.0493755	0.0004058	59.3097	0.162957	2.35133	0.302045	3.91502	0.319184	3.18123	0.408291	0.408321	0.416412	0	2.12489	0	6.84024e-15	4.05693e-13	NM-187J	0.0007506	1.1801e-06	2.26436	1.00029	0.0007	5e-05	2e-05	5e-06	0.00028	1e-05	0.013	0.001	0	0.0004	0	0	96	0	1.96	0	3
55547-01G	110604c-djk	0.443023	0.0012539	0.908707	14.3778	0.0781157	28.1805	0.153107	0.155391	8.62e-05	0.0985092	0.0005803	132.184	0.281268	2.48575	0.599232	1.86159	0.216423	3.36292	0.809934	0.809951	0.81335	0	2.12489	0	6.53184e-15	8.63408e-13	NM-187J	0.0007506	1.1801e-06	2.26497	1.00029	0.0007	5e-05	2e-05	5e-06	0.00028	1e-05	0.013	0.001	0	0.0004	0	0	96	0	1.96	0	3
55547-01H	110604c-djk	0.520761	0.0016743	2.8904	53.7575	0.13427	105.365	0.263168	0.168069	0.0001763	0.111699	0.0007475	152.327	0.357247	3.00272	0.7541	1.89706	0.266441	4.06153	1.01886	1.01888	1.01819	0	2.12488	0	5.71634e-15	8.70751e-13	NM-187J	0.0007506	1.1801e-06	2.26559	1.00029	0.0007	5e-05	2e-05	5e-06	0.00028	1e-05	0.013	0.001	0	0.0004	0	0	96	0	1.96	0	3
55547-01I	110604c-djk	1.20505	0.0083792	1.39901	60.2099	0.469604	118.011	0.920423	0.38958	0.0005031	0.244076	0.0023949	354.866	2.33679	3.9198	1.78472	1.05803	0.274258	5.30016	2.40967	2.40968	2.29229	0	2.12488	0	1.38142e-15	4.90221e-13	NM-187J	0.0007506	1.1801e-06	2.2662	1.00029	0.0007	5e-05	2e-05	5e-06	0.00028	1e-05	0.013	0.001	0	0.0004	0	0	96	0	1.96	0	3
55548-01A	120304a-djk	12.5614	0.107785	0.0056585	2.53854	0.0239607	4.97554	0.0469629	1.38026	2.54e-05	2.3962	0.0210702	3768.09	32.6052	56.5095	15.3437	1.49702	0.101681	74.7478	19.8811	19.8815	18.8516	0	0.00087		0.0409019	154.122	NM-187K	0.0007486	1.2477e-06	1.95783	1.00024	0.0007	5e-05	2e-05	5e-06	0.00028	1e-05	0.013	0.001	0	0.0004	0	0	96	0	1.96	0	3
55548-01B	120304a-djk	0.176443	0.0007129	0.418385	2.63646	0.0276564	5.16747	0.0542065	0.0597038	2.92e-05	0.0471423	0.0003993	59.2951	0.106548	7.38809	0.294493	12.4369	0.339389	9.95036	0.395535	0.395881	0.409189	0	0.0009	0	0.162533	9.63739	NM-187K	0.0007486	1.2477e-06	1.9585	1.00024	0.0007	5e-05	2e-05	5e-06	0.00028	1e-05	0.013	0.001	0	0.0004	0	0	96	0	1.96	0	3
55548-01C	120304a-djk	0.0372499	0.0003535	1.37186	1.82506	0.0085309	3.57712	0.0167206	-0.0127746	9.59572e-06	0.0196671	0.000256	18.4938	0.0796276	7.64725	0.123413	41.2974	0.601056	10.2984	0.165725	0.166607	0.163586	0	0.00091		0.065231	1.20637	NM-187K	0.0007486	1.2477e-06	1.95985	1.00024	0.0007	5e-05	2e-05	5e-06	0.00028	1e-05	0.013	0.001	0	0.0004	0	0	96	0	1.96	0	3
55548-01D	120304a-djk	0.041778	0.0001931	1.07828	1.60887	0.0160356	3.15339	0.0314297	0.0172895	1.7e-05	0.0211039	0.0001715	19.5642	0.0509635	7.3602	0.0802449	37.5784	0.284766	9.9129	0.107779	0.109032	0.107759	0	0.00093	0	0.353035	6.90684	NM-187K	0.0007486	1.2477e-06	1.9604	1.00024	0.0007	5e-05	2e-05	5e-06	0.00028	1e-05	0.013	0.001	0	0.0004	0	0	96	0	1.96	0	3
55548-01E	120304a-djk	0.0749663	0.0002438	0.836462	2.23952	0.0170165	4.38945	0.0333524	0.0082732	1.83e-05	0.027131	0.0001614	29.457	0.0539473	7.50153	0.118099	25.4261	0.235342	10.1027	0.158605	0.159492	0.157605	0	2.12502	0	2.05064e-14	6.04057e-13	NM-187K	0.0007486	1.2477e-06	1.96095	1.00024	0.0007	5e-05	2e-05	5e-06	0.00028	1e-05	0.013	0.001	0	0.0004	0	0	96	0	1.96	0	3
55548-01F	120304a-djk	0.0835311	0.0002327	1.09612	3.26999	0.0125065	6.40918	0.0245127	0.0224174	1.46e-05	0.028967	0.0002122	32.324	0.0473005	7.9293	0.125518	24.4745	0.209246	10.6771	0.168515	0.169447	0.165282	0	2.12502	0	2.26292e-14	7.31468e-13	NM-187K	0.0007486	1.2477e-06	1.9615	1.00024	0.0007	5e-05	2e-05	5e-06	0.00028	1e-05	0.013	0.001	0	0.0004	0	0	96	0	1.96	0	3
55548-01G	120304a-djk	0.0622606	0.0001979	1.10638	2.46015	0.0165378	4.82189	0.0324142	0.0248778	1.79e-05	0.0250573	0.0001749	25.9024	0.0406218	7.72123	0.0983875	29.7576	0.216505	10.3978	0.132112	0.133237	0.133777	0	2.12501	0	1.79909e-14	4.66008e-13	NM-187K	0.0007486	1.2477e-06	1.96205	1.00024	0.0007	5e-05	2e-05	5e-06	0.00028	1e-05	0.013	0.001	0	0.0004	0	0	96	0	1.96	0	3
55548-01H	120304a-djk	0.0801278	0.0002265	4.54813	13.0154	0.0264344	25.5102	0.0518115	0.0173995	3.79e-05	0.0278262	0.000222	30.8737	0.0546562	8.34888	0.123665	26.7957	0.230308	11.2403	0.165977	0.167024	0.171047	0	2.12502	0	2.10429e-14	6.49672e-13	NM-187K	0.0007486	1.2477e-06	1.9626	1.00024	0.0007	5e-05	2e-05	5e-06	0.00028	1e-05	0.013	0.001	0	0.0004	0	0	96	0	1.96	0	3
55548-01I	120304a-djk	0.162571	0.000741	4.06815	23.6201	0.0985814	46.2954	0.193219	0.0811071	0.0001129	0.0440778	0.0004308	54.7967	0.170059	8.8577	0.280824	15.8974	0.356399	11.9231	0.376764	0.377284	0.368016	0	2.12501	0	5.1158e-15	2.80329e-13	NM-187K	0.0007486	1.2477e-06	1.96315	1.00024	0.0007	5e-05	2e-05	5e-06	0.00028	1e-05	0.013	0.001	0	0.0004	0	0	96	0	1.96	0	3
55549-01A	SCV-1584-040603-djk	23.5594	0.717442	0.0037045	3.11702	0.102505	6.10935	0.20091	0.110354	0.0001068	4.43519	0.136819	6976.81	212.383	15.2941	29.4618	0.218735	0.140576	20.3905	39.0581	39.0581	39.6855	0	0.00064		0.0037738	26.3294	NM-187K	0.0007432	7.5256e-07	1.9853	1.00025	0.0007	5e-05	2e-05	5e-06	0.00028	1e-05	0.013	0.001	0	0.0004	0	0	96	0	1.96	0	3
55549-01B	SCV-1584-040603-djk	0.174439	0.0006045	0.34938	2.17663	0.0058722	4.26619	0.0115095	0.0072125	7.50352e-06	0.0457762	0.0003633	55.1866	0.104494	3.82577	0.267179	6.92185	0.301861	5.12227	0.357216	0.357253	0.347375	0	0.00064		0.123689	6.82599	NM-187K	0.0007432	7.5256e-07	1.98586	1.00025	0.0007	5e-05	2e-05	5e-06	0.00028	1e-05	0.013	0.001	0	0.0004	0	0	96	0	1.96	0	3
55549-01C	SCV-1584-040603-djk	0.165633	0.0011445	0.569181	3.36696	0.0146797	6.59925	0.0287721	-0.125146	1.67e-05	0.041529	0.0006616	53.1153	0.20108	4.45987	0.369171	8.37679	0.583843	5.96986	0.493346	0.493383	0.519419	0	0.00067		0.0343826	1.82624	NM-187K	0.0007432	7.5256e-07	1.98723	1.00025	0.0007	5e-05	2e-05	5e-06	0.00028	1e-05	0.013	0.001	0	0.0004	0	0	96	0	1.96	0	3
55549-01D	SCV-1584-040603-djk	0.139277	0.000573	1.32335	6.5826	0.0459715	12.9019	0.0901041	-0.008061	4.96e-05	0.038702	0.0003803	44.1091	0.110757	3.51339	0.224386	7.92852	0.339537	4.70458	0.300072	0.300109	0.308044	0	0.00071	0	0.120632	5.32096	NM-187K	0.0007432	7.5256e-07	1.98778	1.00025	0.0007	5e-05	2e-05	5e-06	0.00028	1e-05	0.013	0.001	0	0.0004	0	0	96	0	1.96	0	3
55549-01E	SCV-1584-040603-djk	0.133843	0.0005794	2.22324	10.6273	0.0755767	20.8295	0.14813	0.0192858	8.14e-05	0.0380399	0.0003634	42.3764	0.122144	3.73295	0.220558	8.74351	0.356148	4.99818	0.294904	0.294948	0.303822	0	2.12479	0	5.07134e-15	2.14905e-13	NM-187K	0.0007432	7.5256e-07	1.98834	1.00025	0.0007	5e-05	2e-05	5e-06	0.00028	1e-05	0.013	0.001	0	0.0004	0	0	96	0	1.96	0	3
55549-01F	SCV-1584-040603-djk	0.120974	0.0006077	2.96859	12.8258	0.0777721	25.1386	0.152433	-0.0328516	8.49e-05	0.0345314	0.0004215	37.997	0.124119	3.34026	0.218734	8.71192	0.42985	4.47304	0.29255	0.292585	0.30034	0	2.12479	0	5.65002e-15	2.14684e-13	NM-187K	0.0007432	7.5256e-07	1.9889	1.00025	0.0007	5e-05	2e-05	5e-06	0.00028	1e-05	0.013	0.001	0	0.0004	0	0	96	0	1.96	0	3
55549-01G	SCV-1584-040603-djk	0.125012	0.0006261	2.14771	9.58888	0.0574327	18.7942	0.112568	-0.0303066	6.27e-05	0.0354725	0.0002991	39.5938	0.106486	3.46945	0.224926	8.70381	0.422272	4.64582	0.300802	0.300839	0.285502	0	2.12476	0	7.4242e-15	2.93952e-13	NM-187K	0.0007432	7.5256e-07	1.98945	1.00025	0.0007	5e-05	2e-05	5e-06	0.00028	1e-05	0.013	0.001	0	0.0004	0	0	96	0	1.96	0	3
55549-01H	SCV-1584-040603-djk	0.197855	0.0009277	7.0568	49.8651	0.193615	97.7356	0.379486	0.0201349	0.0002248	0.0484325	0.0005394	57.6763	0.218687	3.45663	0.341654	5.78397	0.419857	4.62868	0.456913	0.456937	0.44624	0	2.1248	0	5.22083e-15	3.01118e-13	NM-187K	0.0007432	7.5256e-07	1.99001	1.00025	0.0007	5e-05	2e-05	5e-06	0.00028	1e-05	0.013	0.001	0	0.0004	0	0	96	0	1.96	0	3
55549-01I	SCV-1584-040603-djk	0.221449	0.0013712	11.3246	89.5645	0.389414	175.547	0.763252	0.0674353	0.0004429	0.052116	0.0006138	62.9988	0.242113	5.30386	0.526741	7.89114	0.681041	7.09738	0.703476	0.703513	0.713302	0	2.12479	0	1.92213e-15	1.21092e-13	NM-187K	0.0007432	7.5256e-07	1.99057	1.00025	0.0007	5e-05	2e-05	5e-06	0.00028	1e-05	0.013	0.001	0	0.0004	0	0	96	0	1.96	0	3
--- Atmospheric argon ratios and discrimination ---
(40Ar/36Ar)atm	295.5 ± 0.5
(40Ar/38Ar)atm	1575 ± 2
Source of spectrometer discrimination value and error	Data file
Source of spectrometer sensitivity value and error	Saved with run
--- Source of J and use of J Adjustment Table ---
Use J saved with run	FALSE
J adjustment table useage	Use as J
--- Minor irradiation parameters (see also Irradiation Data File) ---
(38Ar/37Ar)Ca	0.00014 ± 0
(38Ar/39Ar)K	0.01077 ± 0
P(36Cl/38Cl)	320 ± 0
--- Decay constants ---
Lambda 40K epsilon	5.810000e-11 ± 5.810000e-11
Lambda 40K Beta	4.962000e-10 ± 4.962000e-10
Lambda 37Ar	0.01975 ± 0
Lambda 39Ar	7.068000e-6 ± 0
Lambda 36Cl	6.308000e-9 ± 0
--- Calculation options ---
Normalize gain	FALSE
Always calculate without ratios	FALSE
Calc. %40Ar* as %40*/(40*+40Atm)	TRUE
Number of trials in Monte Carlo sim.	1000
37Ar/39Ar calculation	Normal
H35Cl Correction	FALSE
--- Isotope curve fitting ---
Parabolic vs. Linear probability cutoff	0.05
Error envelope as 1 or 2 sigma	2
Delete outliers within cycles before fit	TRUE
Average cycles before fit	FALSE
Delete outliers after fit	TRUE
Number of iterations of deleting outliers after fit	1
Cutoff for detecting outliers, sigma	2
Method of centroid location is	mean
--- Files ---
Irradiation data file	Macintosh HD:Users:mcintosh:KAr:Aux.Data:Irradiation Data pre and#142B57
J Adjustment table	Macintosh HD:Users:mcintosh:Desktop: Kelley 2008:J-Adjustment:J-Adjustment Jemez 28.02
[truncated: 88 more columns]
