# Supplementary material
Source: publisher figshare collection journal article supplement (https://gsapubs.figshare.com/ndownloader/files/23295149)
Supplement: Supplementary file 1 [file 23295149 › 2013139-App_F.pdf]

## Appendix F. Supporting data for throw and tilt rate calculations

**Table F-1. Data used to calculate throw rates on the Cañada del Almagre fault**

| Approx. age interval | Stratigraphic offset of lower marker bed    | Age of lower marker bed | Stratigraphic offset of upper marker bed | Age of upper marker bed | Difference in strat offset & age | Rate          |
|----------------------|---------------------------------------------|-------------------------|------------------------------------------|-------------------------|----------------------------------|---------------|
| 3-10 Ma              | 60-67 m (Lobato Fm)                         | 9.2-10.2 Ma             | 0 m (Puye Fm)                            | 3-5 Ma                  | 60-67 m / 4.2-7.2 m.y.           | 8-16 m /m.y.  |
| 9.2-13.4 Ma          | 430-480 m (upper Chama-El Rito Mbr contact) | 13.4-13.6 Ma            | 60-67 m (Lobato Fm)                      | 9.2-10.2 Ma             | 100-120 m / 3.2-4.4 m.y.         | 23-38 m /m.y. |

**Notes:**

More information and illustrations given in Koning and Kempter (2007).

**Table F-2. Data used to estimate throw rates on the Main Pajarito fault near St. Peter's Dome\***

| Approx. age interval    | Stratigraphic offset of lower marker bed                                                                                                                        | Age of lower marker bed | Stratigraphic offset of upper marker bed | Age of upper marker bed | Difference in strat offset & age | Rate           |
|-------------------------|-----------------------------------------------------------------------------------------------------------------------------------------------------------------|-------------------------|------------------------------------------|-------------------------|----------------------------------|----------------|
| 0-1.2 Ma (west strand)  | 60-90 m (base of Tshirege Mbr)                                                                                                                                  | 1.2 Ma                  | No upper bed                             | Present                 | 60-90 m / 1.2 m.y.               | 50-75 m / m.y. |
| 6.8-11 Ma (west strand) | 550 m (Keres Group/Santa Fe Group contact) east of Boundary Pk                                                                                                  | 10-11 Ma                | 60-90 m (Base of Tshirege Mbr)           | 1.2 Ma                  | 460-490 m / 8.8-9.8 m.y.         | 40-60 m /m.y.  |
| 11-13 Ma (fault A)      | Thickness of Vallito Member on immediate hanging wall of fault A – correlates to lower buff sand in Guaje well field (>190 m; age range of 10-11 to 13-13.5 Ma) |                         |                                          |                         | >190 m / 2-3.5 m.y.              | 50-100 m/m.y.  |

**Notes:**

\* See geologic map in Appendix G.

**Table F-3. Data used to calculate throw rates on west strand(s) of Puye fault in the Guaje well field and environs**

| Approx. age interval | Stratigraphic offset of lower marker bed                  | Age of lower marker bed | Stratigraphic offset of upper marker bed                  | Age of upper marker bed | Difference in strat offset & age | Rate          |
|----------------------|-----------------------------------------------------------|-------------------------|-----------------------------------------------------------|-------------------------|----------------------------------|---------------|
| After 1.2 Ma         | 5-10 m* (Tshirege Mbr)                                    | 1.2 Ma                  | No upper bed                                              | N/A                     | 5-10 m / 1.2 m.y.                | 3-4 m /m.y.   |
| 1.2-10.2 Ma          | 16-26 m (Base of western Hernandez Mbr tongue)            | 10.0-10.5 Ma**          | 5-10 m* (Tshirege Mbr)                                    | 1.2 Ma                  | 6-21 m / 8.8-9.3 m.y.            | 1-2 m /m.y.   |
| 10.2-12.4 Ma         | 64-70 m (base of upper Vallito Mbr, above 12.3 Ma basalt) | 12.3-12.5 Ma            | 16-26 m (Base of western Hernandez Mbr tongue)            | 10.0-10.5 Ma**          | 38-54 m / 1.8-2.5 m.y.           | 15-30 m /m.y. |
| 12.4-13.7            | 75-95 m Base of Vallito Mbr***                            | 13.6-13.8 Ma            | 64-70 m (base of upper Vallito Mbr, above 12.3 Ma basalt) | 12.3-12.5 Ma            | 5-31 m / 1.1-1.5 m.y.            | 3-30 m /m.y.  |

**Notes:**

\* Offset estimated from mapping of Dethier (2003) in the mesa between Chupaderos Canyon and Canada de las Latas.

\*\* Age from comparison with base of Hernandez Member in the Gaucho stratigraphic section of Koning and Aby (2005)

\*\*\* Age obtained from extrapolation of depositional rates calculated between the lower basalts in the GR-1 well.

**Table F-4. Data used to calculate throw rates on the North Pajarito fault**

| Approx. age interval | Stratigraphic offset of lower marker bed | Age of lower marker bed | Stratigraphic offset of upper marker bed | Age of upper marker bed | Difference in strat offset & age | Rate           |
|----------------------|------------------------------------------|-------------------------|------------------------------------------|-------------------------|----------------------------------|----------------|
| After 1.2 Ma         | 100-150 m* (Tshirege Mbr)                | 1.22-1.26 Ma            | No upper bed                             | N/a                     | 100-150 m / 1.22-1.26 m.y.       | 79-123 m /m.y. |

**Notes:**

- Offset value from Golombek (1983) and Kempter et al. (2005)

**Table F-5. Data used to calculate throw rates on the Santa Clara fault**

| <b>Approx. age interval</b>        | <b>Stratigraphic offset of lower marker bed</b>    | <b>Age of lower marker bed</b> | <b>Stratigraphic offset of upper marker bed</b>    | <b>Age of upper marker bed</b> | <b>Difference in strat offset &amp; age</b> | <b>Rate</b>                 |
|------------------------------------|----------------------------------------------------|--------------------------------|----------------------------------------------------|--------------------------------|---------------------------------------------|-----------------------------|
| 0-0.6 Ma                           | 10-13 m<br>(Terrace deposit with Lava Creek B ash) | 0.62 Ma                        | No upper bed                                       | Present                        | 10-13 m / 0.62 m.y.                         | 15-20 m / m.y.              |
| 0.6-3.5 Ma<br>(North of Rio Chama) | 130-150 m<br>(Servilleta Basalt)                   | 3.5-3.8 Ma                     | 10-13 m<br>(Terrace deposit with Lava Creek B ash) | 0.62 Ma                        | 117-140 m / 2.9-3.2 m.y.                    | 35-48 m / m.y.              |
| 3.5-8 Ma<br>(North of Rio Chama)   | 510-570 m<br>(minimum offset of CLTZ)***           | 8.1-8.5 Ma                     | 130-150 m<br>(Servilleta Basalt)                   | 3.5-3.8 Ma                     | 360-440 m / 4.3-5.0 m.y.                    | 72-102 m /m.y. <sup>Ψ</sup> |
| 8-10.2 Ma<br>(South of Rio Chama)  | 360-380 m<br>(phreatomagmatic bed)                 | 10.2 Ma                        | 260 m***<br>(minimum offset of CLTZ)               | 8.1-8.5 Ma                     | 100-120 m / 1.7-2.1 m.y.                    | 48-71 m /m.y.**             |
| 8-10.6 Ma<br>(North of Rio Chama)  | 580-640 m*<br>(upper green coarse white ash bed)*  | 10.6 Ma                        | 510-570 m*<br>(minimum offset of CLTZ)             | 8.1-8.5 Ma                     | 10-130 m / 2.1-2.5 m.y.                     | 4-62 m /m.y.**              |

**Notes:**

CLTZ = Chamita lower tuffaceous zone.

\*Offset measured immediately west of the western fault strand of the Santa Clara fault zone using cross-section C-C' of Plate 1.

\*\* Only maximum plotted in Figure 13 because the minimum offset of CLTZ results in a maximum throw rate (i.e., increasing the CLTZ offset results in a smaller numerator).

\*\*\* Faulting has removed the CLTZ along cross-section D-D,' although it is exposed locally to the north on the footwall.

<sup>Ψ</sup> Only the minimum rate was plotted in Figure 13 because minimum offset of CLTZ results in a minimum rate (i.e., increasing the CLTZ offset results in a larger numerator).

**Table F-6. Data used to calculate throw rates on the Black Mesa fault**

| Approx. age interval | Stratigraphic offset of lower marker bed | Age of lower marker bed | Stratigraphic offset of upper marker bed | Age of upper marker bed | Difference in strat offset & age | Rate            |
|----------------------|------------------------------------------|-------------------------|------------------------------------------|-------------------------|----------------------------------|-----------------|
| After 3.5-3.8 Ma     | 34-40 m (Servilleta Basalt flows)        | 3.5-3.8 Ma              | No upper bed                             | Present                 | 34-40 m / 3.5-3.8 m.y.           | 9-11 m /m.y.    |
| 3.5-10 Ma            | 60-70 m (base of Chamita Formation)      | 8.7-10 Ma*              | 34-40 m (Servilleta Basalt flows)        | 3.5-3.8 Ma              | 20-36 m / 4.9-6.5                | 3-7 m /m.y.     |
| 10-30(?) Ma          | 1500-2000 m (base of Santa Fe Group)     | 25-30 Ma                | 60-70 m (base of Chamita Formation)      | 8.7-10 Ma*              | 1430-1940 m / 15-21 m.y.         | 68-129 m / m.y. |

**Notes:**

Stratigraphic offset values taken from north slope of Black Mesa.

\* We use an age of 8.7-10 Ma because early Hemphillian fossils (e.g., the sloth *Pliomastomys*) were found in the Chamita Formation (Tedford and Barghoorn, 1993) but the Chamita lower tuffaceous zone is not present.

**Table F-7. Data used to calculate throw rates on the Rio de Truchas fault**

| Approx. age interval | Stratigraphic offset of lower marker bed | Age of lower marker bed | Stratigraphic offset of upper marker bed | Age of upper marker bed | Difference in strat offset & age | Rate          |
|----------------------|------------------------------------------|-------------------------|------------------------------------------|-------------------------|----------------------------------|---------------|
| After ca. 10 Ma      | 65-100 m                                 | 10 Ma                   | No upper bed                             | N/a                     | 65-100 m / 10 m.y.               | 7-10 m /m.y.  |
| 10-30 Ma             | 350-400 m                                | 25 Ma                   | 65-100 m                                 | 10 Ma                   | 250-335 m / 15 m.y.              | 17-22 m/ m.y. |

**Notes:**

Stratigraphic offset values taken from mapping (Koning and Aby, 2003) and seismic reflection interpretations (see text) where the Rio de Truchas fault passes under its namesake.

**Table F-8. Data used to calculate tilt rates in the northeast Espanola Basin**

| Approx. age interval*      | Mean dip of lower interval     | Age of lower interval | Mean dip of upper interval            | Age of upper interval | Difference in dip & age | Approx Rate |
|----------------------------|--------------------------------|-----------------------|---------------------------------------|-----------------------|-------------------------|-------------|
| 3-12 Ma (Martinez)         | 2.4° (B/t ATZ and LCWAZ)       | 10-12 Ma              | 1°* (distal Oso and Truchas surfaces) | 3-5 Ma**              | 1.4° / 7 m.y.           | 0.2° /m.y.  |
| 10-13 Ma (Martinez)        | 3.7° (within LCWAZ)            | 12-13 Ma              | 2.4° (B/t ATZ and LCWAZ)              | 10-12 Ma              | 1.3° / 1.5 m.y.         | 0.9° /m.y.  |
| 12-13 Ma (Martinez)        | 4.0° (basal Cejita Mbr tongue) | 13.0-13.2 Ma          | 3.7° (within LCWAZ)                   | 12-13 Ma              | 0.3° / 0.6 m.y.         | 0.5° /m.y.  |
| 12-13 Ma (C. de Vaqueros)  | 4.9° (basal Cejita Mbr tongue) | 13.0-13.2 Ma          | 3.2° (within LCWAZ)                   | 12-13 Ma              | 1.7° / 0.6 m.y.         | 2.8° /m.y.  |
| 13-14 Ma (Martinez)        | 4.6° (within PWAZ)             | 13.2-14.0 Ma          | 4.0° (basal Cejita Mbr tongue)        | 13.0-13.2 Ma          | 0.6° / 0.5 m.y.         | 1.2° /m.y.  |
| 13-14 Ma (C. de Vaqueros)  | 5.8° (within PWAZ)             | 13.2-14.0 Ma          | 4.9° (basal Cejita Mbr tongue)        | 13.0-13.2 Ma          | 0.9° / 0.5 m.y.         | 1.8° /m.y.  |
| 13.2-15.0 Ma (Martinez)    | 7.0° (Pojoaque Mbr below PWAZ) | 15.0-14.0 Ma          | 4.6° (within PWAZ)                    | 13.2-14.0 Ma          | 2.4° / 0.9 m.y.         | 2.7° /m.y.  |
| 13.2-15.4 Ma (C. de Vaq.)  | 6.1° (B/t WA4 and PWAZ)        | 15.4-14.0 Ma          | 5.8° (within PWAZ)                    | 13.2-14.0 Ma          | 0.3° / 1.2 m.y.         | 0.3° /m.y.  |
| 14.0-15.4 Ma (Martinez)    | 7.0° (SR above WA4)            | 15.4-15.0 Ma          | 7.0° (Pojoaque Mbr below PWAZ)        | 15.0-14.0 Ma          | 0° / 0.75 m.y.          | 0° / m.y.   |
| 14.0-15.4 Ma (Arroyo Seco) | 5.2° (SR above WA4)            | 15.4-15.0 Ma          | 4.6° (Pojoaque Mbr below PWAZ)        | 15.0-14.0 Ma          | 0.6° / 0.75 m.y.        | 0.8° /m.y.  |
| 15.0-15.8 Ma (Martinez)    | 8.5° (B/t WA4 and WA2)         | 15.8-15.4 Ma          | 7.0° (SR above WA4)                   | 15.4-15.0 Ma          | 1.5° / 0.4 m.y.         | 3.8° /m.y.  |
| 15.0-15.8 Ma (Arroyo Seco) | 6.4° (B/t WA4 and WA2)         | 15.8-15.4 Ma          | 5.2° (SR above WA4)                   | 15.4-15.0 Ma          | 1.2° / 0.4 m.y.         | 3.0° / m.y. |

**Notes:**

See text and Figure 12 for more information regarding the age- and dip-related datasets. These calculations averaged dips within intervals whose boundaries had age control (Figure 12). We utilized attitudes depicted in Plate 1. For calculating rates, the median of a given age interval was used.

\*Text in paranthesis denote dip dataset locality used (see Figures 5 and 12)

\*\* Utilized distal Oso and Truchas surfaces of Manley (1979, fig. 5).

WA4 = No. 4 white ash of Galusha and Blick (1971)

WA2 = No. 2 white ash of Galusha and Blicka (1971)

**Table F-9. Data used to calculate tilt rates on the Northern Barrancos monocline**

| Approx. age interval | Dip of datum                      | Age of datum | Apparent dip of upper marker bed | Age of upper marker bed | Difference in dip & age | Rate          |
|----------------------|-----------------------------------|--------------|----------------------------------|-------------------------|-------------------------|---------------|
| 0-13.2 Ma            | 14-28° (base of Cuarteles Member) | 13.2 Ma      | 1°*                              | 3-5 Ma*                 | 14-28°/8.2-10.2 m.y.    | 1.4-3.4°/m.y. |

**Notes:**

\* Utilized distal Oso and Truchas surfaces of Manley (1979, fig. 5).

**Table F-10. Data used to calculate tilt rates on the Southern Barrancos monocline**

| Approx. age interval | Apparent dip of older marker bed         | Age of lower marker bed | Apparent dip of younger marker bed       | Age of upper marker bed | Difference in dip & age | Rate             |
|----------------------|------------------------------------------|-------------------------|------------------------------------------|-------------------------|-------------------------|------------------|
| 3-5 Ma               | 1.3-1.9° (Tga1 and Tga2 terrace straths) | 4-5 Ma                  | 0.9-1.0° (Tga3 terrace strath)           | ca. 3 Ma                | 0.3-1.0° / 1-2 m.y.     | 0.2-1.0° /m.y.   |
| 5-10 Ma              | 2-4° (pumiceous interval)                | 8.5-10 Ma               | 1.3-1.9° (Tga1 and Tga2 terrace straths) | 4-5 Ma                  | 0.1-2.7° / 3.5-6.0 m.y. | 0.02-0.8° / m.y. |
| 8.5-13.2 Ma          | 5-6° (Cuarteles Mbr base)                | 13.1 Ma                 | 2-4° (pumiceous interval)                | 8.5-10 Ma               | 1-4° / 3.1-4.6 m.y.     | 0.2-1.3° / m.y.  |
| 13.2-15 Ma           | 8-9° (Pojaque Mbr base)                  | 15 Ma                   | 5-6° (Cuarteles Mbr base)                | 13.1 Ma                 | 2-4° / 1.9 m.y.         | 1-2° / m.y.      |
| 14.5-23(?) Ma        | 17°                                      | 19-23(?) Ma             | 8-9°                                     | 15.0 Ma                 | 8-9°/4-8.5 m.y.         | 0.9-2° / m.y.    |

**Notes:**

Dip values came from limb of monocline, west of west-down fault (see Figure 15).  
The pumiceous interval is located in the Cuarteles Member near Cañada Ancha.

**Table F-11. Data used to calculate throw rates on the West Arroyo Seco fault**

| <b>Approx.<br/>age interval</b> | <b>Stratigraphic<br/>offset of<br/>lower<br/>marker bed</b> | <b>Age of<br/>lower<br/>marker<br/>bed</b> | <b>Stratigraphic<br/>offset of<br/>upper<br/>marker bed</b> | <b>Age of<br/>upper<br/>marker<br/>bed</b> | <b>Differ-<br/>ence in<br/>stratigraphic<br/>offset &amp; age</b> | <b>Rate</b>     |
|---------------------------------|-------------------------------------------------------------|--------------------------------------------|-------------------------------------------------------------|--------------------------------------------|-------------------------------------------------------------------|-----------------|
| 0-15.8 Ma                       | 123                                                         | 15.8 Ma<br>(No. 2<br>white ash)            | None                                                        | 0                                          | 123/15.8 m.y.                                                     | 8<br>m/m.y.     |
| 3-15.8 Ma                       | 123                                                         | 15.8 Ma<br>(No. 2<br>white ash)            | None<br>(Terraces of<br>Manley,<br>1979b)                   | 3-5                                        | 123/12.8-10.8                                                     | 10-11<br>m/m.y. |
| 15.4-15.8<br>Ma                 | N/A                                                         | 15.8 Ma<br>(No. 2<br>white ash<br>2)       | None                                                        | 15.4 Ma<br>(No. 4<br>white<br>ash)         | 3 m of<br>thickening/0.4<br>Ma                                    | 8<br>m/m.y.     |

**Note:**

No.2 and No. 4 white ashes belong to the Skull Ridge Member of the Tesuque Formation (Galusha and Blick, 1971)

**REFERENCES**

Dethier, D.P., 2003, Geologic map of the Puye quadrangle, Los Alamos and Rio Arriba

Counties, New Mexico: U.S. Geological Survey Miscellaneous Field Studies Map MF-2419,  
scale 1:24,000.

Galusha, T., and Blick, J.C., 1971, Stratigraphy of the Santa Fe Group, New Mexico: Bulletin of  
the American Museum of Natural History, v. 144, 127 p.

Golombek, M.P., 1983, Geology, structure, and tectonics of the Pajarito fault zone in the  
Española Basin of the Rio Grande rift, New Mexico: Geological Society of America Bulletin,  
v. 94, p. 192-205.

Kempton, K.A., Kelley, S., Koning, D., Ferguson, C., Osburn, B., and Fluk, L., 2005, Preliminary  
geologic map of the Vallecitos 7.5-minute quadrangle, Rio Arriba and Sandoval Counties,

New Mexico, New Mexico Bureau of Geology and Mineral Resources, Open-file Geologic Map OF-GM 108, scale 1:24,000.

Koning, D.J., and Aby, S., 2003, revised June-2004, Geologic map of the Velarde 7.5-minute quadrangle, Rio Arriba and Taos counties, New Mexico: New Mexico Bureau of Geology and Mineral Resources, Open-file Geologic Map OF-GM-79, scale 1:24,000.

Koning, D.J., and Aby, S.B., 2005, Proposed Members of the Chamita Formation, north-central New Mexico, *in* Lucas, S.G., Zeigler, K.E., Lueth, V.W., and Owen, D.E., eds., Geology of the Chama Basin: New Mexico Geological Society, 56<sup>th</sup> Annual Field Conference Guidebook, p. 258-278.

Koning, D.J., and Kempter, K., 2007, Inferences regarding middle to late Miocene vertical motion on the Cañada de Almagre and Cerritos faults near Clara Peak, northeastern Jemez Mountains [non-peer reviewed mini-paper], *in* Kues, B.S., Kelley, S.A., and Lueth, W., eds., Geology of the Jemez Region II: New Mexico Geological Society, 58<sup>th</sup> Annual Field Conference Guidebook, First-day road log, p. 49-51.

Manley, K., 1979, Tertiary and Quaternary stratigraphy of the Northeast Plateau, Española Basin, New Mexico, *in* Ingersoll, R.V., Woodward, L.A., and James, H.L., eds., Guidebook of Santa Fe Country: New Mexico Geological Society, 30<sup>th</sup> Annual Field Conference Guidebook, p. 231-236.

Tedford, R.H., and Barghoorn, S.F., 1993, Neogene stratigraphy and mammalian biochronology of the Española Basin, northern New Mexico: Vertebrate paleontology in New Mexico, New Mexico Museum of Natural History and Science, Bulletin 2, p. 159-168.
