# Supplementary material
Source: publisher figshare collection journal article supplement (https://gsapubs.figshare.com/ndownloader/files/23295149)
Supplement: Supplementary file 1 [file 23295149 › 2013139-App_G.pdf]

Figure G-1

GSA DR Item **2013139** accompanies Koning, D.J., Grauch, V.J.S., Connell, S.D., Ferguson, J., McIntosh, W., Slate, J.L., Wan, E., and Baldrige, W.S., 2013, Structure and tectonic evolution of the eastern Española Basin, Rio Grande rift, north-central New Mexico, in Hudson, M.R., and Grauch, V.J.S., eds., *New Perspectives on Rio Grande Rift Basins: From Tectonics to Groundwater*. Geological Society of America Special Paper 494, p. 185–219, [https://doi.org/10.1130/2013.2494\(08\)](https://doi.org/10.1130/2013.2494(08)).

## Geologic map of the St Peters Dome area

Map modified from Goff et al. (1990 and 2002) using field investigations of the lead author.

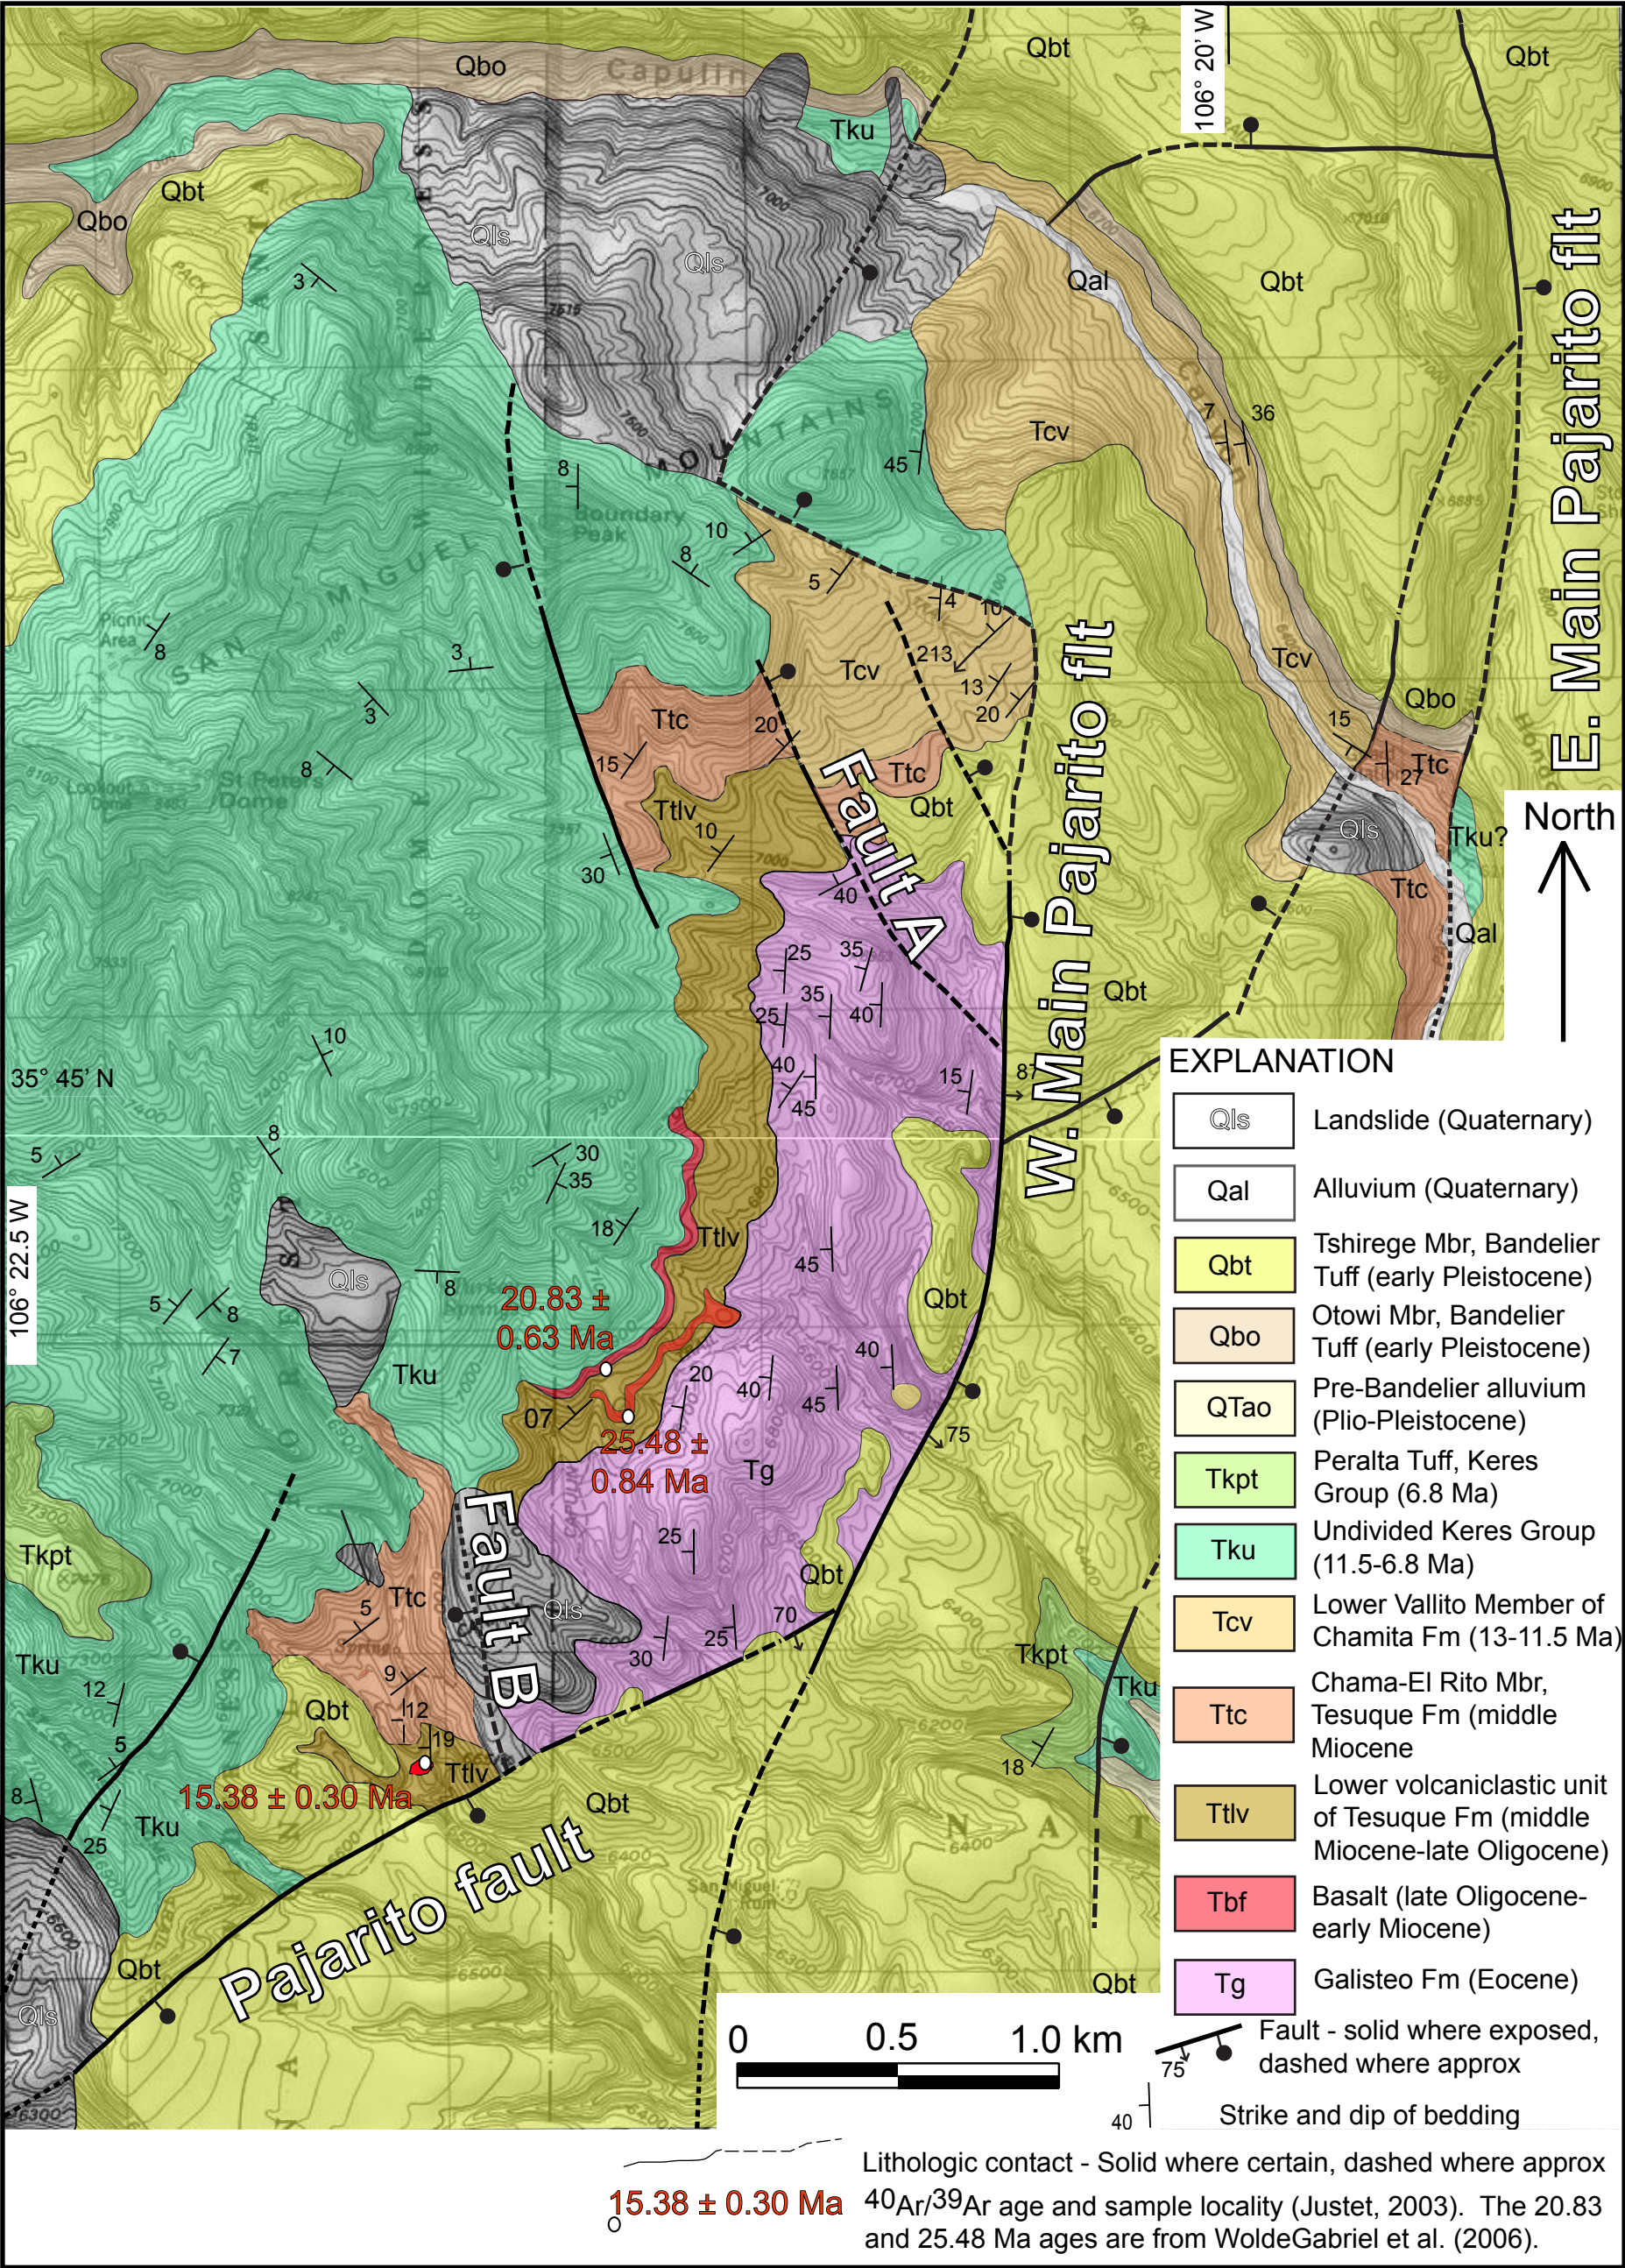

## FIGURE G-1 REFERENCES

- Goff, F., Gardner, J.N, and Valentine, G., 1990, Geology of St. Peter's Dome area, Jemez Mountains, New Mexico: New Mexico Bureau of Mines and Mineral Resources, Geologic Map 69, scale 1:24,000.
- Goff, F., Gardner, J.N., and Reneau, S.L., 2002, Geology of Frijoles quadrangle, Los Alamos and Sandoval Counties, New Mexico: New Mexico Bureau of Geology and Mineral Resources, Open-file map series OF-GM 42, scale 1:24,000.
- Justet, L., 2003, Effects of basalt intrusion on the multi-phase evolution of the Jemez volcanic field, NM [Ph.D. dissertation]: Las Vegas, University of Nevada, 248 p.
- WoldeGabriel, G., Warren, R.G., Cole, G., Goff, F, Broxton, D., Vaniman, D., Peters, L., Naranjo, A., and Kluk, E., 2006a, Volcanism, tectonics, and chronostratigraphic records in the Pajarito Plateau of the Española Basin, Rio Grande rift, north-central New Mexico, USA: Los Alamos National Laboratory, Report LA-UR-06-6089, 122 p.
