# Supplementary material
Source: publisher figshare collection journal article supplement (https://gsapubs.figshare.com/ndownloader/files/23295149)

Figure H-1

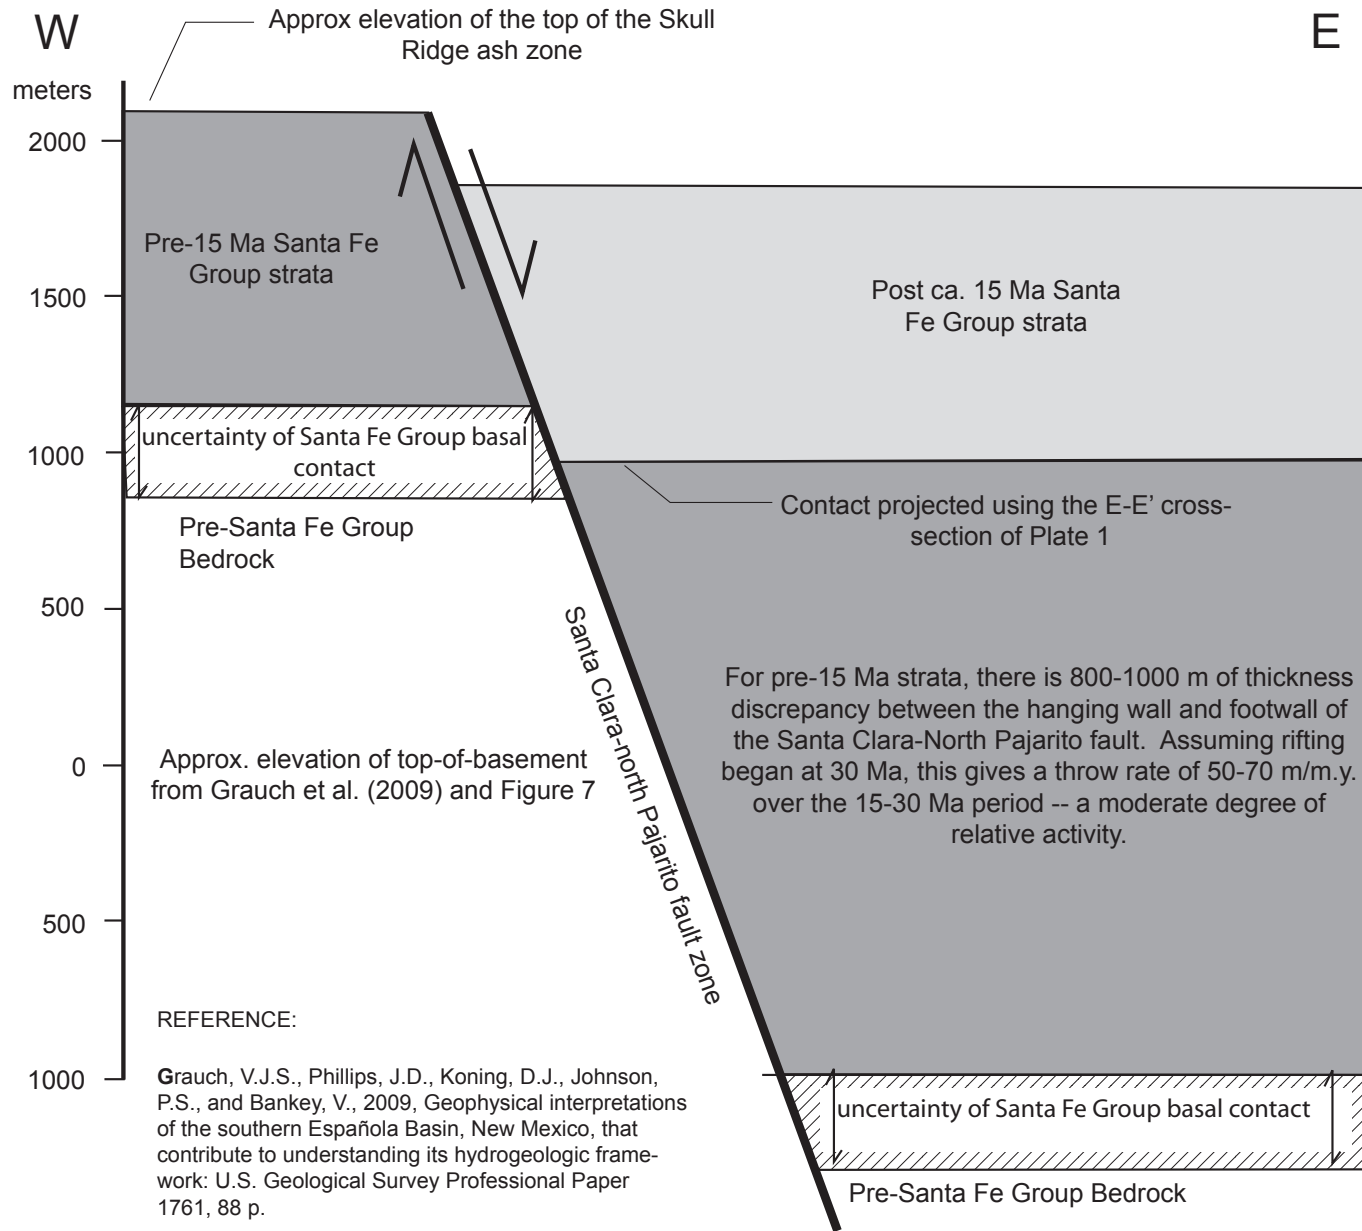

Supplement: Supplementary file 1 [file 23295149 › 2013139-App_H.pdf]
